# Supplementary material for: Circulating miRNAs as Noninvasive Biomarkers for PDAC Diagnosis and Prognosis in Mexico
Source: MDPI journal article supplement (doi:10.3390/ijms242015193), 2023-10-14
Supplement: s1 [file s1]

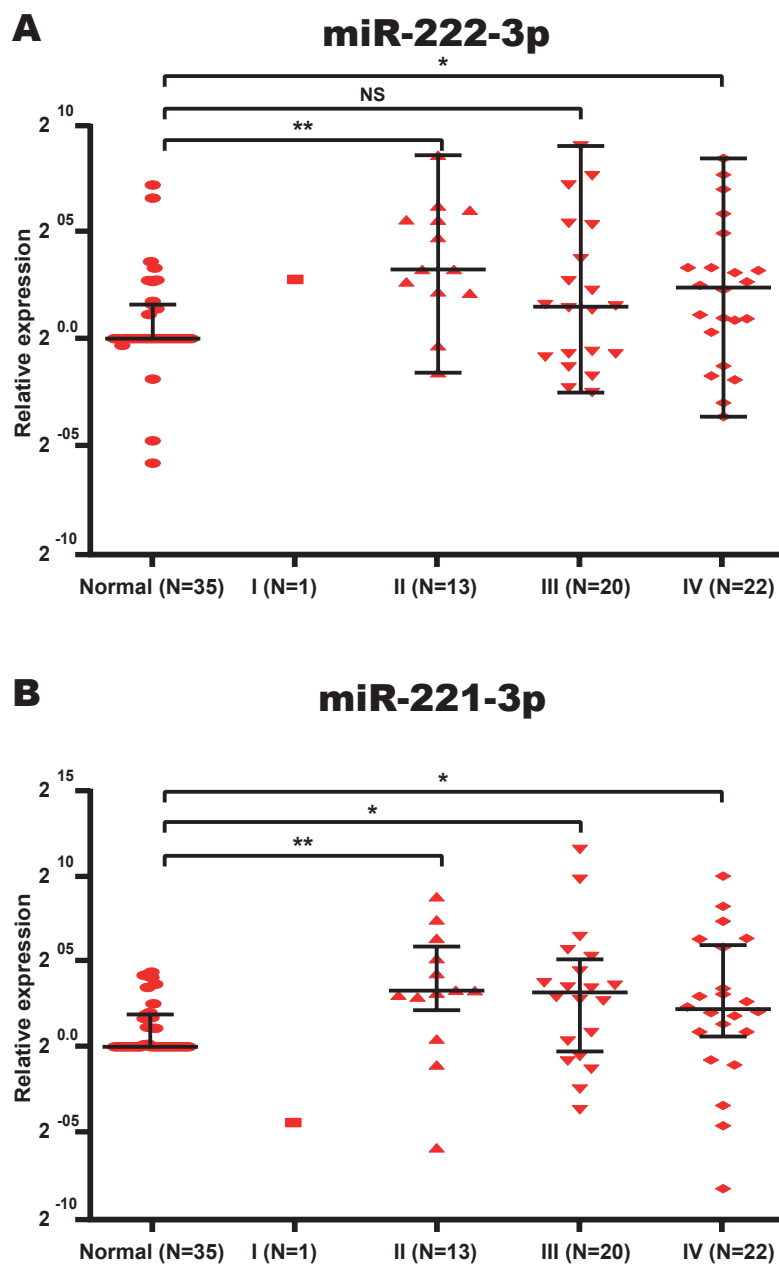

**Figure S1.** miR-222-3p and miR-221-3p expression according to PDAC stages. **(A)** The miR-222-3p and **(B)** miR-221-3p expression was analyzed by RT-qPCR assays in tissue and plasma samples of PDAC patients and control people that live in Mexico. The differences were determined using the Mann-Whitney test. NS: not significant, \* $p$ -value<0.05 and \*\* $p$ -value<0.01.

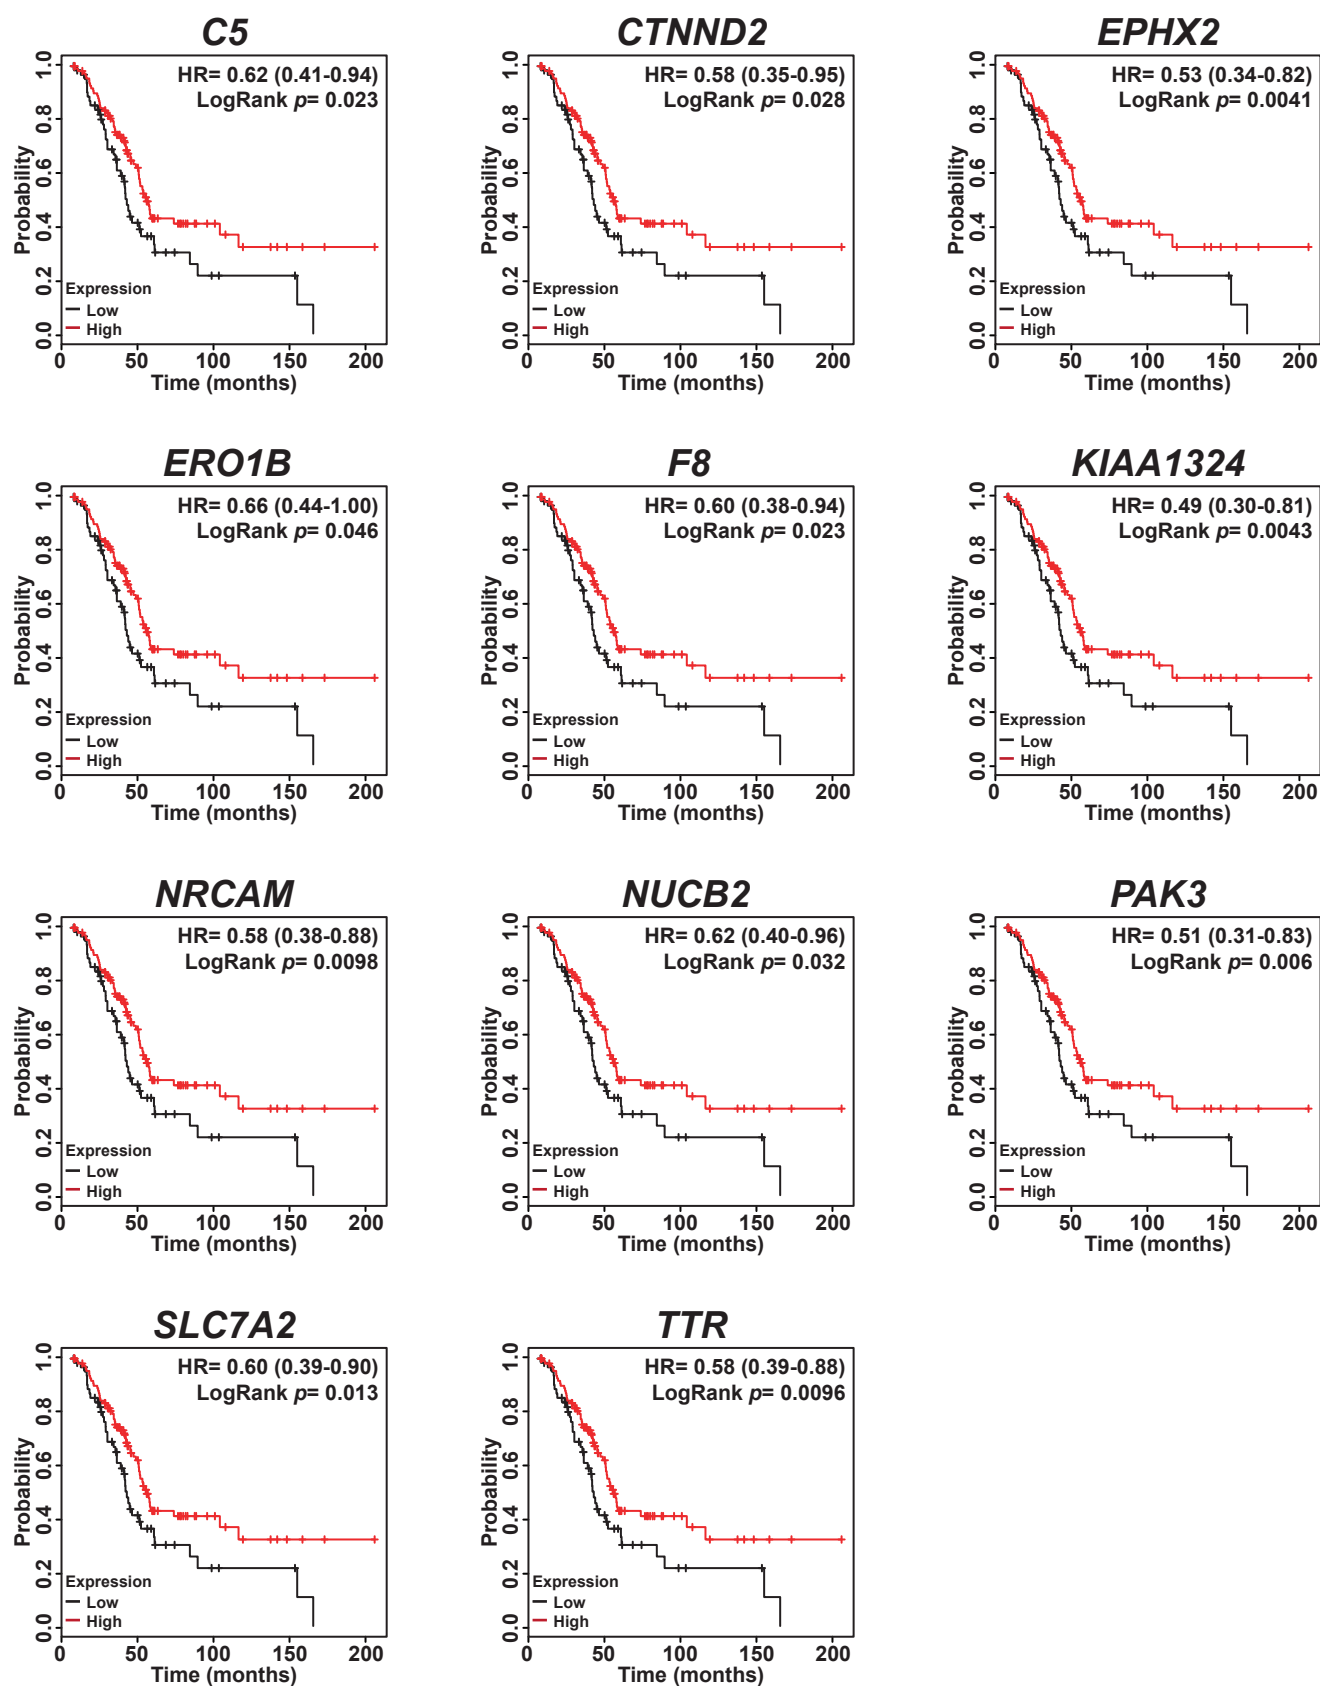

**Figure S2.** 47 mRNAs were identified as targets of 4 DEMiRNAs and their impact on the prognosis of PDAC. Kaplan-Meier curves of 11 mRNAs were identified as targets of 4 DEMiRNAs identified in this work.



**Figure S3.** Expression of 11 mRNAs in PDAC **(A)** The box plot was downloaded from the GEPIA tool. The gray and red boxes represent normal and cancer tissues, respectively. Tumor, T; Normal, N; and \*,  $p$ -value<0.05, considered as statistically significant. PAAD pancreatic adenocarcinoma. **(B)** Immunohistochemistry of the four target mRNAs of 4 DE miRNAs found in this work. EPHX2: Normal: staining: high; intensity: strong; quantity: >75%. PDAC: staining: medium; intensity: moderate; quantity: <25%. ERO1B: Normal: staining: high; intensity: strong; quantity: >75%. PDAC: staining: not detected; intensity: weak; quantity: <25%. KIAA1324: Normal: staining: high; intensity: strong; quantity: >75%. PDAC: staining: low; intensity: moderate; quantity: <25%. NRCAM: Normal: staining: high; intensity: strong; quantity: >75%. PDAC: staining: low; intensity: weak; quantity: >75%.



**Table S1. mRNAs target of four differentially expressed miRNAs identified in this study.**

| hsa-miR-222-3p  | hsa-miR-345-5p      | hsa-miR-100-5p | hsa-miR-221-3p |
|-----------------|---------------------|----------------|----------------|
| <i>A1CF</i>     | <i>A1CF</i>         | <i>ABCA5</i>   | <i>A1CF</i>    |
| <i>A4GNT</i>    | <i>A4GNT</i>        | <i>ABCC5</i>   | <i>A4GNT</i>   |
| <i>AADAC</i>    | <i>AADAC</i>        | <i>ABCF3</i>   | <i>AADAC</i>   |
| <i>AADACL2</i>  | <i>AAGAB</i>        | <i>ABCG2</i>   | <i>AADACL2</i> |
| <i>AAGAB</i>    | <i>AAK1</i>         | <i>ABHD17A</i> | <i>AAGAB</i>   |
| <i>AAK1</i>     | <i>AAR2</i>         | <i>ABHD2</i>   | <i>AAK1</i>    |
| <i>ABAT</i>     | <i>AARD</i>         | <i>ABLIM1</i>  | <i>ABAT</i>    |
| <i>ABCA1</i>    | <i>AARS2</i>        | <i>ABLIM2</i>  | <i>ABCA1</i>   |
| <i>ABCA3</i>    | <i>AASDH</i>        | <i>ACAA2</i>   | <i>ABCA3</i>   |
| <i>ABCA5</i>    | <i>AASDHPPT</i>     | <i>ACAD10</i>  | <i>ABCA5</i>   |
| <i>ABCA8</i>    | <i>ABAT</i>         | <i>ACAP2</i>   | <i>ABCA8</i>   |
| <i>ABCB11</i>   | <i>ABCA1</i>        | <i>ACKR3</i>   | <i>ABCB11</i>  |
| <i>ABCB5</i>    | <i>ABCA10</i>       | <i>ACO1</i>    | <i>ABCB5</i>   |
| <i>ABCC11</i>   | <i>ABCA4</i>        | <i>ACOT11</i>  | <i>ABCC11</i>  |
| <i>ABCC12</i>   | <i>ABCA5</i>        | <i>ACOT9</i>   | <i>ABCC12</i>  |
| <i>ABCC5</i>    | <i>ABCA6</i>        | <i>ACSBG1</i>  | <i>ABCC5</i>   |
| <i>ABCD2</i>    | <i>ABCA8</i>        | <i>ACSF3</i>   | <i>ABCD2</i>   |
| <i>ABCF1</i>    | <i>ABCA9</i>        | <i>ACSL3</i>   | <i>ABCF1</i>   |
| <i>ABCF3</i>    | <i>ABCB10</i>       | <i>ACTB</i>    | <i>ABCF3</i>   |
| <i>ABCG1</i>    | <i>ABCB11</i>       | <i>ACTR1B</i>  | <i>ABCG2</i>   |
| <i>ABCG2</i>    | <i>ABCB5</i>        | <i>ACVR2B</i>  | <i>ABHD12</i>  |
| <i>ABHD12</i>   | <i>ABCB6</i>        | <i>ADAM19</i>  | <i>ABHD13</i>  |
| <i>ABHD13</i>   | <i>ABCB8</i>        | <i>ADAMTS5</i> | <i>ABHD17A</i> |
| <i>ABHD17A</i>  | <i>ABCB9</i>        | <i>ADAP1</i>   | <i>ABHD2</i>   |
| <i>ABHD2</i>    | <i>ABCC12</i>       | <i>ADARB2</i>  | <i>ABHD3</i>   |
| <i>ABHD3</i>    | <i>ABCC5</i>        | <i>ADAT1</i>   | <i>ABHD5</i>   |
| <i>ABHD4</i>    | <i>ABCC6</i>        | <i>ADAT2</i>   | <i>ABITRAM</i> |
| <i>ABHD5</i>    | <i>ABCD2</i>        | <i>ADAT3</i>   | <i>ABL1</i>    |
| <i>ABI3BP</i>   | <i>ABCD3</i>        | <i>ADCK1</i>   | <i>ABL2</i>    |
| <i>ABL1</i>     | <i>ABCD4</i>        | <i>ADCY1</i>   | <i>ABLIM1</i>  |
| <i>ABLIM1</i>   | <i>ABCE1</i>        | <i>ADGRE2</i>  | <i>ABRACL</i>  |
| <i>ABRAXAS2</i> | <i>ABCF1</i>        | <i>ADH1B</i>   | <i>ABTB2</i>   |
| <i>ABTB2</i>    | <i>ABCF2</i>        | <i>AFAP1L1</i> | <i>ACAA2</i>   |
| <i>ACAA2</i>    | <i>ABCF3</i>        | <i>AGAP1</i>   | <i>ACAD10</i>  |
| <i>ACACA</i>    | <i>ABCG1</i>        | <i>AGBL5</i>   | <i>ACADL</i>   |
| <i>ACAD10</i>   | <i>ABCG2</i>        | <i>AGFG2</i>   | <i>ACADM</i>   |
| <i>ACADL</i>    | <i>ABHD10</i>       | <i>AGO2</i>    | <i>ACADSB</i>  |
| <i>ACADM</i>    | <i>ABHD13</i>       | <i>AGO3</i>    | <i>ACAP3</i>   |
| <i>ACAP3</i>    | <i>ABHD14A</i>      | <i>AGPAT3</i>  | <i>ACBD5</i>   |
| <i>ACBD5</i>    | <i>ABHD14A-ACY1</i> | <i>AGPAT4</i>  | <i>ACBD7</i>   |
| <i>ACBD7</i>    | <i>ABHD15</i>       | <i>AGTPBP1</i> | <i>ACCS</i>    |
| <i>ACCS</i>     | <i>ABHD17A</i>      | <i>AHR</i>     | <i>ACE</i>     |

|          |          |          |          |
|----------|----------|----------|----------|
| ACE      | ABHD17B  | AIG1     | ACER2    |
| ACER2    | ABHD17C  | AIPL1    | ACER3    |
| ACER3    | ABHD18   | AK4      | ACIN1    |
| ACOD1    | ABHD2    | AKAP1    | ACOD1    |
| ACOT11   | ABHD3    | AKAP13   | ACOT11   |
| ACOT2    | ABHD5    | AKR7A2   | ACOT2    |
| ACOT9    | ABHD6    | AKT1     | ACOT9    |
| ACOX1    | ABI1     | ALDH3B2  | ACOX1    |
| ACP7     | ABI3BP   | ALDH9A1  | ACOX3    |
| ACSF2    | ABITRAM  | ALG13    | ACSF2    |
| ACSL3    | ABL1     | ALG14    | ACSL3    |
| ACSL6    | ABL2     | ALG3     | ACSM5    |
| ACSM5    | ABLIM1   | ALKBH2   | ACSS1    |
| ACSS1    | ABLIM3   | ALS2     | ACSS3    |
| ACSS3    | ABRA     | ALS2CL   | ACTB     |
| ACTB     | ABRACL   | AMER3    | ACTC1    |
| ACTC1    | ABRAXAS1 | AMMECR1  | ACTG1    |
| ACTG1    | ABRAXAS2 | AMN      | ACTL7A   |
| ACTL7A   | ABT1     | ANAPC1   | ACTR1A   |
| ACTR1A   | ABTB2    | ANAPC11  | ACTR2    |
| ACTR2    | ACACB    | ANGPT2   | ACTR3    |
| ACTR3    | ACAD8    | ANGPT4   | ACTR3B   |
| ACVR1B   | ACADL    | ANK3     | ACVR1B   |
| ACVR1C   | ACADM    | ANKLE1   | ACVR1C   |
| ACVR2A   | ACADSB   | ANKRD28  | ACVR2A   |
| ACVR2B   | ACAN     | ANKRD33B | ACVR2B   |
| ADAD1    | ACAP2    | ANKRD49  | ADAD1    |
| ADAL     | ACBD3    | ANKRD52  | ADAL     |
| ADAM10   | ACBD5    | ANKRD63  | ADAM10   |
| ADAM11   | ACBD7    | ANKS6    | ADAM11   |
| ADAM12   | ACER2    | ANP32E   | ADAM12   |
| ADAM17   | ACER3    | ANTXR1   | ADAM17   |
| ADAM1A   | ACHE     | AOPEP    | ADAM18   |
| ADAM22   | ACKR3    | AP1AR    | ADAM1A   |
| ADAM23   | ACKR4    | AP1M1    | ADAM22   |
| ADAM28   | ACO1     | AP1S1    | ADAM23   |
| ADAM8    | ACO2     | AP3M1    | ADAM28   |
| ADAM9    | ACOT11   | AP5B1    | ADAM8    |
| ADAMTS1  | ACOT13   | APBA1    | ADAM9    |
| ADAMTS14 | ACOT2    | APBA3    | ADAMTS1  |
| ADAMTS17 | ACOT4    | APC2     | ADAMTS14 |
| ADAMTS5  | ACOT9    | APCDD1   | ADAMTS16 |
| ADAMTSL1 | ACOX1    | APEX1    | ADAMTS17 |
| ADARB2   | ACP1     | API5     | ADAMTS2  |

|           |        |          |           |
|-----------|--------|----------|-----------|
| ADAT1     | ACPP   | APOA1    | ADAMTS5   |
| ADCY1     | ACRV1  | APOBEC3D | ADAMTS6   |
| ADCY2     | ACSBG1 | APOBEC3F | ADAMTSL1  |
| ADCY9     | ACSF3  | APOC3    | ADAP1     |
| ADCYAP1   | ACSL3  | APOL2    | ADARB2    |
| ADCYAP1R1 | ACSL4  | AR       | ADAT1     |
| ADD1      | ACSL6  | ARFGEF1  | ADCY1     |
| ADD2      | ACSM2A | ARHGEF7  | ADCY2     |
| ADD3      | ACSM2B | ARID3A   | ADCY9     |
| ADGRL3    | ACSM3  | ARID3B   | ADCYAP1   |
| ADH1B     | ACSM4  | ARPP19   | ADCYAP1R1 |
| ADH5      | ACSS3  | ARRB1    | ADD1      |
| ADHFE1    | ACTBL2 | ARRDC4   | ADD2      |
| ADIPOR1   | ACTC1  | ARSD     | ADD3      |
| ADM2      | ACTL6A | ART5     | ADGRG3    |
| ADNP2     | ACTL7B | ASB7     | ADGRL2    |
| ADO       | ACTN2  | ATAT1    | ADGRL3    |
| ADRA2C    | ACTR10 | ATF7IP2  | ADH1B     |
| ADSL      | ACTR2  | ATIC     | ADH5      |
| AFDN      | ACTR3  | ATM      | ADHFE1    |
| AFF1      | ACTR3C | ATP10B   | ADI1      |
| AFF2      | ACTR6  | ATP11A   | ADIPOR1   |
| AFF3      | ACTR8  | ATP11C   | ADM2      |
| AFF4      | ACTRT1 | ATP1A2   | ADNP2     |
| AFG1L     | ACVR1  | ATP1B3   | ADO       |
| AGAP1     | ACVR1B | ATP2A2   | ADSL      |
| AGBL5     | ACVR1C | ATP2B1   | AFDN      |
| AGFG1     | ACVR2A | ATP2B3   | AFF1      |
| AGL       | ACVR2B | ATP2B4   | AFF2      |
| AGPAT3    | ACVRL1 | ATP5F1A  | AFF3      |
| AGPAT4    | ACY1   | ATP5MG   | AFG1L     |
| AGPAT5    | ACYP2  | ATP5PB   | AGAP1     |
| AGPS      | ADA2   | ATP6AP1  | AGBL2     |
| AGTPBP1   | ADAL   | ATP6AP1L | AGBL5     |
| AGTRAP    | ADAM10 | ATP6V1C2 | AGFG1     |
| ago-01    | ADAM12 | ATP7B    | AGGF1     |
| ago-02    | ADAM17 | AUTS2    | AGL       |
| ago-03    | ADAM18 | AVPR1B   | AGO1      |
| ago-04    | ADAM2  | AXIN1    | AGO2      |
| AHCTF1    | ADAM22 | B3GALNT2 | AGO3      |
| AHCY      | ADAM23 | B4GALNT1 | AGO4      |
| AHRR      | ADAM28 | B4GALNT3 | AGPAT3    |
| AHSA1     | ADAM7  | B4GALT7  | AGPAT4    |
| AIDA      | ADAM9  | BAG5     | AGPAT5    |

|          |           |           |          |
|----------|-----------|-----------|----------|
| AIRE     | ADAMTS12  | BAK1      | AGPS     |
| AJAP1    | ADAMTS15  | BAMBI     | AGTPBP1  |
| AK3      | ADAMTS16  | BAZ1B     | AGTRAP   |
| AK4      | ADAMTS17  | BAZ2A     | AHCY     |
| AK9      | ADAMTS2   | BAZ2B     | AHRR     |
| AKAP11   | ADAMTS20  | BBX       | AIDA     |
| AKAP13   | ADAMTS4   | BCAR1     | AIRE     |
| AKAP5    | ADAMTS5   | BCAS4     | AJAP1    |
| AKAP6    | ADAMTS8   | BCL10     | AK2      |
| AKAP9    | ADAMTSL1  | BCL7C     | AK3      |
| AKIRIN1  | ADAMTSL3  | BECN1     | AK4      |
| AKR1C1   | ADARB2    | BEND2     | AK9      |
| AKR7A2   | ADAT1     | BEND6     | AKAP13   |
| AKT2     | ADAT2     | BID       | AKAP2    |
| AKT3     | ADAT3     | BIRC5     | AKAP5    |
| AKTIP    | ADCK2     | BLOC1S2   | AKAP6    |
| ALDH16A1 | ADCY1     | BLOC1S4   | AKAP8    |
| ALDH1A1  | ADCY10    | BMF       | AKAP9    |
| ALDH1A2  | ADCY5     | BMP2      | AKIRIN1  |
| ALDH1B1  | ADCY9     | BMPR2     | AKR1C1   |
| ALDH1L2  | ADCYAP1   | BRCC3     | AKR1C2   |
| ALDH3A2  | ADCYAP1R1 | BRD4      | AKR7A2   |
| ALDH5A1  | ADD1      | BRF2      | AKT2     |
| ALG14    | ADD2      | BRIX1     | AKT3     |
| ALG3     | ADGB      | BSG       | AKTIP    |
| ALG6     | ADGRA3    | BTBD9     | ALDH16A1 |
| ALG8     | ADGRB3    | BTD       | ALDH1A1  |
| ALG9     | ADGRE2    | BTG3      | ALDH1A2  |
| ALKBH1   | ADGRF1    | C10orf71  | ALDH1B1  |
| ALPK3    | ADGRF5    | C11orf49  | ALDH1L2  |
| ALX4     | ADGRG2    | C12orf45  | ALG14    |
| AMACR    | ADGRG3    | C12orf66  | ALG6     |
| AMDHD2   | ADGRG6    | C14orf28  | ALG8     |
| AMER3    | ADGRG7    | C16orf54  | ALG9     |
| AMIGO1   | ADGRL1    | C19orf38  | ALKBH1   |
| AMIGO3   | ADGRL2    | C1orf109  | ALKBH8   |
| AMMECR1  | ADGRL3    | C1orf115  | ALPK3    |
| AMMECR1L | ADGRL4    | C20orf194 | ALX4     |
| AMOT     | ADH1B     | C21orf91  | AMACR    |
| AMPD2    | ADH5      | C2CD4C    | AMD1     |
| AMPD3    | ADH6      | C2orf72   | AMDHD2   |
| AMPH     | ADIPOR1   | C3        | AMER3    |
| AMZ1     | ADIPOR2   | C3orf52   | AMIGO1   |
| ANAPC10  | ADK       | C3orf67   | AMIGO3   |

|           |         |          |           |
|-----------|---------|----------|-----------|
| ANAPC16   | ADM2    | C3orf80  | AMMECR1   |
| ANG       | ADNP    | C5orf22  | AMMECR1L  |
| ANGPTL2   | ADNP2   | C7orf26  | AMOT      |
| ANGPTL3   | ADO     | CACNA1C  | AMPD2     |
| ANGPTL8   | ADORA1  | CACNA1I  | AMPH      |
| ANK2      | ADPGK   | CACNG7   | AMZ1      |
| ANKDD1B   | ADPRHL1 | CACNG8   | ANAPC10   |
| ANKFY1    | ADRA1A  | CACTIN   | ANAPC16   |
| ANKHD1    | ADRA2A  | CALCOCO2 | ANG       |
| ANKIB1    | ADRB1   | CALM2    | ANGPTL2   |
| ANKMY1    | ADSL    | CAMK2N1  | ANGPTL3   |
| ANKRD10   | ADSS    | CAMKK2   | ANGPTL4   |
| ANKRD12   | ADTRP   | CAMTA1   | ANGPTL8   |
| ANKRD16   | AEBP2   | CAND2    | ANK2      |
| ANKRD17   | AEN     | CAPN13   | ANKDD1B   |
| ANKRD18A  | AFAP1L1 | CAPNS1   | ANKFY1    |
| ANKRD20A2 | AFAP1L2 | CAPZB    | ANKHD1    |
| ANKRD20A4 | AFDN    | CARD9    | ANKIB1    |
| ANKRD27   | AFF1    | CASC4    | ANKMY1    |
| ANKRD28   | AFF2    | CASK     | ANKRD10   |
| ANKRD33B  | AFF4    | CASZ1    | ANKRD12   |
| ANKRD34C  | AFG1L   | CATSPER1 | ANKRD16   |
| ANKRD36   | AFG3L2  | CBL      | ANKRD17   |
| ANKRD40   | AFMID   | CBX3     | ANKRD18A  |
| ANKRD44   | AFTPH   | CBX6     | ANKRD20A2 |
| ANKRD49   | AGA     | CBX7     | ANKRD20A4 |
| ANKRD50   | AGAP1   | CCBE1    | ANKRD27   |
| ANKRD52   | AGAP4   | CCDC113  | ANKRD28   |
| ANKRD54   | AGAP5   | CCDC115  | ANKRD33B  |
| ANKRD65   | AGAP6   | CCDC117  | ANKRD34C  |
| ANKS1B    | AGAP9   | CCDC124  | ANKRD44   |
| ANO1      | AGBL5   | CCDC134  | ANKRD49   |
| ANO10     | AGFG1   | CCDC59   | ANKRD50   |
| ANO3      | AGFG2   | CCDC77   | ANKRD52   |
| ANO7      | AGK     | CCN1     | ANKRD54   |
| ANOS1     | AGL     | CCNG1    | ANKRD55   |
| ANP32B    | AGMAT   | CCNYL1   | ANKRD65   |
| ANTXR2    | AGMO    | CCR1     | ANKS1B    |
| ANXA1     | AGO1    | CCR4     | ANO1      |
| ANXA11    | AGO2    | CCZ1B    | ANO10     |
| ANXA3     | AGO3    | CD14     | ANO3      |
| ANXA6     | AGO4    | CD274    | ANO6      |
| AP1AR     | AGPAT4  | CD93     | ANO7      |
| AP1B1     | AGPAT5  | CDC25A   | ANOS1     |

|           |         |          |          |
|-----------|---------|----------|----------|
| AP1G1     | AGPS    | CDC42BPG | ANP32B   |
| AP1M1     | AGR3    | CDC42EP3 | ANTXR2   |
| AP1S3     | AGTPBP1 | CDC42EP4 | ANXA1    |
| AP2A1     | AGTR2   | CDC73    | ANXA11   |
| AP3B2     | AGXT    | CDCA3    | ANXA3    |
| AP3M1     | AGXT2   | CDH6     | ANXA6    |
| AP5B1     | AHCTF1  | CDK19    | AP1AR    |
| AP5M1     | AHCY    | CDK5RAP2 | AP1G1    |
| AP5S1     | AHCYL1  | CDK6     | AP1M1    |
| APAF1     | AHCYL2  | CDS1     | AP1S1    |
| APBA1     | AHDC1   | CDS2     | AP1S3    |
| APCDD1L   | AHI1    | CDYL2    | AP2A1    |
| APEX2     | AHNAK   | CELF1    | AP3B1    |
| APLP2     | AHR     | CELSR1   | AP3B2    |
| APOBEC1   | AHRR    | CENPF    | AP3M1    |
| APOBEC3C  | AIDA    | CEP104   | AP5B1    |
| APOBEC3F  | AIF1L   | CEP170B  | AP5M1    |
| APOC3     | AIG1    | CEP85    | AP5S1    |
| APOL2     | AIMP1   | CEP85L   | APAF1    |
| APOL3     | AIPL1   | CERK     | APBA1    |
| APOL4     | AJAP1   | CFAP20   | APCDD1   |
| APOL6     | AJUBA   | CFAP44   | APCDD1L  |
| APOLD1    | AK2     | CGAS     | APEX2    |
| APOOL     | AK3     | CGN      | APLP2    |
| APP       | AK4     | CHAF1B   | APOB     |
| APPBP2    | AK5     | CHERP    | APOBEC1  |
| APPL1     | AK6     | CHID1    | APOBEC3C |
| APTX      | AK9     | CHRM2    | APOBEC3F |
| AQP12A    | AKAIN1  | CHRNA2   | APOC3    |
| AQP12B    | AKAP10  | CHST3    | APOL2    |
| AQP3      | AKAP11  | CHSY1    | APOL3    |
| AQP4      | AKAP12  | CIAO3    | APOL4    |
| AR        | AKAP13  | CKS1B    | APOL6    |
| ARAP2     | AKAP17A | CLCN6    | APOLD1   |
| AREL1     | AKAP2   | CLCN7    | APOOL    |
| ARF1      | AKAP5   | CLDN11   | APP      |
| ARF4      | AKAP6   | CLDN12   | APPBP2   |
| ARF5      | AKAP7   | CLEC16A  | APPL1    |
| ARFGEF1   | AKIRIN1 | CLEC4C   | APTX     |
| ARFGEF3   | AKIRIN2 | CLIC5    | AQP12A   |
| ARFIP1    | AKR1C1  | CLIP2    | AQP12B   |
| ARHGAP11A | AKR1C2  | CLK4     | AQP3     |
| ARHGAP12  | AKR1D1  | CLN8     | AQP4     |
| ARHGAP19  | AKR7A2  | CLPX     | AQR      |

|             |          |         |           |
|-------------|----------|---------|-----------|
| ARHGAP20    | AKT2     | CLU     | AR        |
| ARHGAP28    | AKT3     | CLYBL   | ARAF      |
| ARHGAP40    | AKTIP    | CMBL    | ARAP2     |
| ARHGAP42    | ALCAM    | CMTM6   | AREL1     |
| ARHGEF10    | ALDH16A1 | CNBP    | ARF1      |
| ARHGEF12    | ALDH1A2  | CNDP2   | ARF3      |
| ARHGEF17    | ALDH1A3  | CNTNAP5 | ARF4      |
| ARHGEF37    | ALDH1L2  | COG5    | ARF5      |
| ARHGEF38    | ALDH3A2  | COG6    | ARF6      |
| ARHGEF39    | ALDH5A1  | COL26A1 | ARFGEF1   |
| ARHGEF4     | ALDH6A1  | COL4A1  | ARFGEF3   |
| ARHGEF7     | ALDH7A1  | COMMMD2 | ARFIP1    |
| ARID1A      | ALDH8A1  | COMTD1  | ARGLU1    |
| ARID2       | ALDH9A1  | COPS7B  | ARHGAP11A |
| ARIH2       | ALG1     | COQ2    | ARHGAP12  |
| ARL1        | ALG10    | CORO6   | ARHGAP19  |
| ARL10       | ALG10B   | COX10   | ARHGAP20  |
| ARL11       | ALG13    | COX5A   | ARHGAP28  |
| ARL13B      | ALG14    | CPEB2   | ARHGAP31  |
| ARL14EP     | ALG5     | CPNE5   | ARHGAP40  |
| ARL14EPL    | ALG6     | CPSF2   | ARHGAP42  |
| ARL17A      | ALG8     | CREBBP  | ARHGAP5   |
| ARL17B      | ALG9     | CREG2   | ARHGEF10  |
| ARL2BP      | ALKAL2   | CRIP1   | ARHGEF12  |
| ARL4A       | ALKBH1   | CRLS1   | ARHGEF17  |
| ARL4D       | ALKBH8   | CROCC   | ARHGEF18  |
| ARL5A       | ALOX12   | CRTC1   | ARHGEF37  |
| ARL6        | ALOX15   | CSNK1E  | ARHGEF38  |
| ARL6IP1     | ALPG     | CSTF2   | ARHGEF39  |
| ARL6IP5     | ALPK2    | CTC1    | ARHGEF4   |
| ARMC1       | ALPK3    | CTDSP2  | ARHGEF7   |
| ARMC10      | ALPP     | CTDSPL  | ARID1A    |
| ARMC3       | ALS2     | CTDSPL2 | ARID2     |
| ARMCX3      | ALX1     | CTU1    | ARID3A    |
| ARMH3       | ALX4     | CUEDC1  | ARIH2     |
| ARMT1       | AMACR    | CUL1    | ARL1      |
| ARNT        | AMD1     | CUL2    | ARL10     |
| ARNTL2      | AMDHD1   | CUL5    | ARL11     |
| ARPC2       | AMER2    | CUX1    | ARL13B    |
| ARPC4-TTLL3 | AMER3    | CXCL16  | ARL14EP   |
| ARPIN       | AMFR     | CXCR5   | ARL14EPL  |
| ARPP19      | AMIGO2   | CXorf56 | ARL17A    |
| ARRDC2      | AMMECR1  | CYHR1   | ARL17B    |
| ARRDC4      | AMMECR1L | CYP1A2  | ARL2BP    |



|         |           |         |            |
|---------|-----------|---------|------------|
| ARSA    | AMN1      | CYP20A1 | ARL3       |
| ARSB    | AMOT      | CYP26B1 | ARL4A      |
| ARSE    | AMOTL2    | CYP2W1  | ARL4D      |
| ARSG    | AMPD3     | CYTH1   | ARL5A      |
| ARSK    | AMTN      | CYYR1   | ARL6       |
| ASB1    | AMZ1      | DAPK3   | ARL6IP1    |
| ASB4    | ANAPC1    | DAZAP2  | ARL6IP5    |
| ASB5    | ANAPC10   | DBN1    | ARMC1      |
| ASB6    | ANAPC7    | DBNDD1  | ARMC10     |
| ASB7    | ANGEL1    | DBNL    | ARMC3      |
| ASB9    | ANGEL2    | DBT     | ARMC6      |
| ASCC3   | ANGPT1    | DCAF10  | ARMC7      |
| ASCL4   | ANGPT2    | DCAF5   | ARMCX3     |
| ASPA    | ANGPT4    | DCAF6   | ARMH3      |
| ASPH    | ANGPTL1   | DCBLD1  | ARMT1      |
| ASTN1   | ANGPTL2   | DCUN1D5 | ARNT       |
| ASTN2   | ANGPTL3   | DDAH1   | ARNTL2     |
| ASXL1   | ANK1      | DDIT4L  | ARPC2      |
| ASXL3   | ANK3      | DDRKG1  | ARPC4-TTL3 |
| ATAD2B  | ANKEF1    | DDX21   | ARPIN      |
| ATAT1   | ANKFY1    | DDX4    | ARPP19     |
| ATF2    | ANKH      | DDX49   | ARRDC2     |
| ATF3    | ANKHD1    | DEAF1   | ARRDC3     |
| ATF4    | ANKIB1    | DELE1   | ARRDC4     |
| ATF5    | ANKMY1    | DENR    | ARSB       |
| ATF6    | ANKMY2    | DESI2   | ARSD       |
| ATF7    | ANKRA2    | DFFB    | ARSE       |
| ATF7IP2 | ANKRD11   | DGCR2   | ARSG       |
| ATG12   | ANKRD12   | DHRS13  | ARSK       |
| ATG13   | ANKRD13A  | DHX33   | ASAH2      |
| ATG16L1 | ANKRD13B  | DHX40   | ASB4       |
| ATG2B   | ANKRD13C  | DIAPH2  | ASB5       |
| ATG3    | ANKRD16   | DIP2A   | ASB6       |
| ATG4A   | ANKRD17   | DIPK2B  | ASB7       |
| ATG7    | ANKRD18A  | DLG5    | ASB9       |
| ATIC    | ANKRD18B  | DLX3    | ASCC3      |
| ATL2    | ANKRD20A2 | DLX4    | ASCL4      |
| ATL3    | ANKRD20A4 | DMRT1   | ASPA       |
| ATM     | ANKRD22   | DNAJB4  | ASPH       |
| ATN1    | ANKRD28   | DNAJB6  | ASTN1      |
| ATOH8   | ANKRD29   | DNAJB7  | ASTN2      |
| ATP10D  | ANKRD31   | DNAJC11 | ASXL2      |
| ATP11A  | ANKRD33B  | DNAJC15 | ASXL3      |
| ATP11B  | ANKRD34B  | DNAJC28 | ASZ1       |

|          |          |           |          |
|----------|----------|-----------|----------|
| ATP13A2  | ANKRD34C | DNAJC5    | ATAD2B   |
| ATP1A1   | ANKRD37  | DNASE2    | ATAT1    |
| ATP1B2   | ANKRD42  | DNM3      | ATF2     |
| ATP1B4   | ANKRD44  | DNMT1     | ATF3     |
| ATP2A3   | ANKRD45  | DOCK8-AS1 | ATF4     |
| ATP2B3   | ANKRD46  | DOLK      | ATF6     |
| ATP2B4   | ANKRD49  | DOT1L     | ATF7     |
| ATP4A    | ANKRD50  | DPH7      | ATF7IP2  |
| ATP5MC1  | ANKRD52  | DPM3      | ATG12    |
| ATP5MC3  | ANKRD6   | DPY19L3   | ATG16L1  |
| ATP6AP1  | ANKRD66  | DPY19L4   | ATG2B    |
| ATP6V0A2 | ANKS1B   | DPYSL2    | ATG3     |
| ATP6V0D2 | ANKS3    | DRG1      | ATG4A    |
| ATP6V0E1 | ANKS4B   | DUSP1     | ATG7     |
| ATP6V1E1 | ANKS6    | DUSP4     | ATIC     |
| ATP6V1G2 | ANO3     | DUSP9     | ATL2     |
| ATP7A    | ANO5     | DUXA      | ATL3     |
| ATP7B    | ANO6     | DVL3      | ATM      |
| ATP8A1   | ANO7     | DYNC1LI2  | ATOH8    |
| ATP8B4   | ANO8     | DYRK1A    | ATP10D   |
| ATPAF2   | ANOS1    | DZIP1L    | ATP11A   |
| ATRNL    | ANP32A   | E2F2      | ATP11B   |
| ATRNL1   | ANP32E   | E2F7      | ATP13A2  |
| ATRX     | ANTXR1   | ECEL1     | ATP1A1   |
| ATXN1    | ANTXR2   | EDC3      | ATP1B2   |
| ATXN1L   | ANXA11   | EDEM1     | ATP1B4   |
| ATXN7L1  | ANXA4    | EDRF1     | ATP2A2   |
| ATXN7L3  | ANXA5    | EEF1A1    | ATP2A3   |
| ATXN7L3B | ANXA6    | EEF2K     | ATP2B3   |
| AUTS2    | AOC3     | EFCAB13   | ATP2B4   |
| AVL9     | AOPEP    | EFCAB2    | ATP4A    |
| AXIN2    | AOX1     | EFNA1     | ATP5MC1  |
| AZI2     | AP1AR    | EFNB2     | ATP5MC3  |
| B3GALNT2 | AP1G1    | EGR2      | ATP5PB   |
| B3GALT5  | AP1S1    | EGR4      | ATP6AP1  |
| B3GAT2   | AP1S2    | EHD1      | ATP6V0A2 |
| B3GLCT   | AP1S3    | EIF2AK2   | ATP6V0E1 |
| B3GNT3   | AP3B1    | EIF2B5    | ATP6V1E1 |
| B3GNT4   | AP3B2    | EIF2S3    | ATP6V1G2 |
| B3GNT5   | AP3M1    | EIF5A     | ATP7A    |
| B3GNT7   | AP3S2    | EIF5AL1   | ATP8A1   |
| B4GALNT4 | AP4E1    | EIF5B     | ATP8A2   |
| B4GALT7  | AP4S1    | ELAC1     | ATP8B4   |
| BAALC    | AP5B1    | ELF4      | ATPAF2   |

|               |          |           |           |
|---------------|----------|-----------|-----------|
| BAALC-AS2     | AP5M1    | ELF5      | ATRN      |
| BACE2         | APAF1    | ELOVL6    | ATRX      |
| BAG2          | APBA1    | ELP2      | ATXN1     |
| BAG3          | APBB1IP  | EML6      | ATXN1L    |
| BAG5          | APBB2    | ENTPD5    | ATXN7     |
| BAG6          | APCDD1   | ENTPD6    | ATXN7L1   |
| BAHD1         | APEH     | EPB41L1   | ATXN7L3   |
| BAIAP2        | APH1B    | EPC2      | ATXN7L3B  |
| BAMBI         | API5     | EPDR1     | AUTS2     |
| BARD1         | APLF     | EPHA7     | AVL9      |
| BAZ2B         | APLP1    | EPHX2     | AXIN2     |
| BBC3          | APOA1    | EPHX3     | AZI2      |
| BBS12         | APOB     | EPN2      | AZIN1     |
| BBS4          | APOBEC3C | EPSTI1    | B2M       |
| BBS7          | APOBEC3F | ERC1      | B3GALNT1  |
| BBX           | APOBEC3G | ERGIC1    | B3GALNT2  |
| BCAT1         | APOBEC4  | ERI1      | B3GALT5   |
| BCHE          | APOL3    | ESF1      | B3GAT2    |
| BCL10         | APOL4    | ESR1      | B3GLCT    |
| BCL11A        | APOL6    | ETFDH     | B3GNT3    |
| BCL11B        | APOLD1   | ETV3      | B3GNT4    |
| BCL2L11       | APOOL    | EVI2B     | B3GNT5    |
| BCL2L13       | APP      | EWSR1     | B3GNT7    |
| BCL2L14       | APPBP2   | EXOC3     | B4GALNT4  |
| BCL2L15       | APPL1    | EXOC3-AS1 | B4GALT2   |
| BCL2L2        | APPL2    | EXOC4     | B4GALT7   |
| BCL2L2-PABPN1 | APTIX    | F11R      | BAALC     |
| BCL7B         | AQP1     | FAAP20    | BAALC-AS2 |
| BCL7C         | AQP2     | FABP2     | BACE2     |
| BCL9          | AQP4     | FAHD1     | BACH1     |
| BCLAF1        | AQP7     | FAIM2     | BACH2     |
| BDNF          | AQP9     | FAM102A   | BAG2      |
| BDP1          | AQR      | FAM110D   | BAG3      |
| BEAN1         | AR       | FAM111A   | BAG5      |
| BEGAIN        | AREL1    | FAM118A   | BAHD1     |
| BEND4         | ARF1     | FAM120AOS | BAIAP2    |
| BEND6         | ARF3     | FAM126B   | BAMBI     |
| BEST3         | ARF6     | FAM155B   | BARD1     |
| BFSP2         | ARFGAP1  | FAM161A   | BAZ1A     |
| BHLHE40       | ARFGAP3  | FAM163A   | BAZ2B     |
| BICD1         | ARFGEF1  | FAM204A   | BBC3      |
| BICD2         | ARFGEF2  | FAM219A   | BBS12     |
| BICDL1        | ARFGEF3  | FAM221A   | BBS4      |
| BIVM          | ARFIP1   | FAM49A    | BBS7      |

|         |           |             |               |
|---------|-----------|-------------|---------------|
| BLOC1S3 | ARGLU1    | FAM53A      | BBX           |
| BLOC1S4 | ARHGAP1   | FAM83B      | BCAS2         |
| BLOC1S5 | ARHGAP11A | FANCC       | BCAS3         |
| BLVRA   | ARHGAP12  | FARP1       | BCAT1         |
| BMERB1  | ARHGAP18  | FARSB       | BCHE          |
| BMF     | ARHGAP19  | FASN        | BCL10         |
| BMI1    | ARHGAP20  | FBXL15      | BCL11A        |
| BMP10   | ARHGAP24  | FBXL18      | BCL11B        |
| BMP2K   | ARHGAP28  | FBXL20      | BCL2L11       |
| BMP3    | ARHGAP29  | FBXL4       | BCL2L13       |
| BMP6    | ARHGAP30  | FBXO41      | BCL2L14       |
| BMP8A   | ARHGAP31  | FBXW2       | BCL2L15       |
| BMP8B   | ARHGAP32  | FCN2        | BCL2L2        |
| BMPR1A  | ARHGAP44  | FCRL2       | BCL2L2-PABPN1 |
| BMPR2   | ARHGAP5   | FGF11       | BCL6          |
| BMT2    | ARHGEF10  | FGF17       | BCL7B         |
| BNC2    | ARHGEF12  | FGFBP1      | BCL7C         |
| BNIP2   | ARHGEF26  | FGFR3       | BCL9          |
| BNIP3   | ARHGEF28  | FIGN        | BCLAF1        |
| BNIP3L  | ARHGEF3   | FKBP5       | BCLAF3        |
| BOD1    | ARHGEF38  | FKRP        | BDNF          |
| BOLL    | ARHGEF39  | FLT1        | BDP1          |
| BORCS5  | ARHGEF4   | FLVCR2      | BEAN1         |
| BORCS6  | ARHGEF7   | FNBP1       | BECN1         |
| BORCS8  | ARID1A    | FOSL2       | BEGAIN        |
| BPNT1   | ARID2     | FOXA1       | BEND4         |
| BPTF    | ARID3A    | FOXH1       | BEND6         |
| BRAP    | ARID3B    | FOXL2NB     | BEST3         |
| BRCA1   | ARID4B    | FOXN2       | BFSP2         |
| BRD8    | ARID5B    | FOXO3       | BHLHE40       |
| BRF1    | ARIH1     | FOXP1       | BHLHE41       |
| BRINP3  | ARIH2     | FPGT-TNNI3K | BICD1         |
| BRIX1   | ARL1      | FRA10AC1    | BICD2         |
| BRK1    | ARL10     | FRAT1       | BICDL1        |
| BRS3    | ARL11     | FRMD1       | BLOC1S4       |
| BRSK2   | ARL13B    | FRMD8       | BLOC1S5       |
| BRWD1   | ARL14     | FRRS1       | BLVRA         |
| BRWD3   | ARL14EP   | FSTL4       | BMERB1        |
| BSDC1   | ARL14EPL  | FUBP1       | BMF           |
| BSPRY   | ARL17A    | FUS         | BMI1          |
| BTAF1   | ARL17B    | FUT1        | BMP10         |
| BTBD7   | ARL4A     | FUT5        | BMP2K         |
| BTBD9   | ARL4C     | FUT7        | BMP3          |
| BTD     | ARL5A     | FXN         | BMP6          |

|                    |                    |                |                  |
|--------------------|--------------------|----------------|------------------|
| <i>BTF3L4</i>      | <i>ARL5B</i>       | <i>FXR1</i>    | <i>BMP8A</i>     |
| <i>BTLA</i>        | <i>ARL5C</i>       | <i>FZD1</i>    | <i>BMP8B</i>     |
| <i>BTN3A1</i>      | <i>ARL6</i>        | <i>FZD2</i>    | <i>BMPER</i>     |
| <i>BTN3A2</i>      | <i>ARL6IP1</i>     | <i>FZD5</i>    | <i>BMPR1A</i>    |
| <i>BTN3A3</i>      | <i>ARL6IP6</i>     | <i>FZD7</i>    | <i>BMPR2</i>     |
| <i>BTNL8</i>       | <i>ARMC1</i>       | <i>FZD8</i>    | <i>BMT2</i>      |
| <i>BTNL9</i>       | <i>ARMC10</i>      | <i>G6PC2</i>   | <i>BNC2</i>      |
| <i>BTRC</i>        | <i>ARMC12</i>      | <i>G6PC3</i>   | <i>BNIP2</i>     |
| <i>BZW1</i>        | <i>ARMC3</i>       | <i>GABRA4</i>  | <i>BNIP3</i>     |
| <i>C10orf105</i>   | <i>ARMC7</i>       | <i>GABRP</i>   | <i>BNIP3L</i>    |
| <i>C10orf67</i>    | <i>ARMC8</i>       | <i>GAD2</i>    | <i>BOD1</i>      |
| <i>C11orf1</i>     | <i>ARMCX2</i>      | <i>GAGE1</i>   | <i>BORCS5</i>    |
| <i>C11orf54</i>    | <i>ARMH4</i>       | <i>GALNT11</i> | <i>BORCS6</i>    |
| <i>C11orf74</i>    | <i>ARMT1</i>       | <i>GAS8</i>    | <i>BORCS8</i>    |
| <i>C11orf87</i>    | <i>ARNT</i>        | <i>GATA6</i>   | <i>BPNT1</i>     |
| <i>C11orf98</i>    | <i>ARNT2</i>       | <i>GATAD2B</i> | <i>BRAP</i>      |
| <i>C12orf40</i>    | <i>ARNTL</i>       | <i>GBP4</i>    | <i>BRCA1</i>     |
| <i>C12orf49</i>    | <i>ARNTL2</i>      | <i>GBX2</i>    | <i>BRD1</i>      |
| <i>C12orf65</i>    | <i>ARPC1A</i>      | <i>GCSH</i>    | <i>BRD8</i>      |
| <i>C12orf74</i>    | <i>ARPC2</i>       | <i>GDE1</i>    | <i>BRINP3</i>    |
| <i>C14orf132</i>   | <i>ARPC4-TTLL3</i> | <i>GDF11</i>   | <i>BRIX1</i>     |
| <i>C15orf61</i>    | <i>ARPC5</i>       | <i>GDF6</i>    | <i>BRK1</i>      |
| <i>C16orf54</i>    | <i>ARPC5L</i>      | <i>GDF7</i>    | <i>BRMS1L</i>    |
| <i>C16orf72</i>    | <i>ARPIN</i>       | <i>GFM1</i>    | <i>BRS3</i>      |
| <i>C16orf95</i>    | <i>ARPIN-AP3S2</i> | <i>GFOD1</i>   | <i>BRSK2</i>     |
| <i>C17orf75</i>    | <i>ARPP19</i>      | <i>GHRHR</i>   | <i>BRWD1</i>     |
| <i>C18orf21</i>    | <i>ARPP21</i>      | <i>GID4</i>    | <i>BRWD3</i>     |
| <i>C18orf25</i>    | <i>ARRB1</i>       | <i>GIMAP6</i>  | <i>BSDC1</i>     |
| <i>C18orf54</i>    | <i>ARRDC1-AS1</i>  | <i>GIPC3</i>   | <i>BSN</i>       |
| <i>C19orf12</i>    | <i>ARRDC2</i>      | <i>GIPR</i>    | <i>BSPRY</i>     |
| <i>C1GALT1</i>     | <i>ARRDC3</i>      | <i>GLB1L</i>   | <i>BTBD7</i>     |
| <i>C1orf115</i>    | <i>ARRDC4</i>      | <i>GLG1</i>    | <i>BTD</i>       |
| <i>C1orf116</i>    | <i>ARSA</i>        | <i>GLIPR2</i>  | <i>BTF3L4</i>    |
| <i>C1orf198</i>    | <i>ARSB</i>        | <i>GMDS</i>    | <i>BTLA</i>      |
| <i>C1orf210</i>    | <i>ARSD</i>        | <i>GMEB2</i>   | <i>BTN3A1</i>    |
| <i>C1orf216</i>    | <i>ARSE</i>        | <i>GMPR</i>    | <i>BTN3A2</i>    |
| <i>C1orf226</i>    | <i>ARSG</i>        | <i>GMPS</i>    | <i>BTN3A3</i>    |
| <i>C1orf35</i>     | <i>ARSJ</i>        | <i>GNA13</i>   | <i>BTNL8</i>     |
| <i>C1orf43</i>     | <i>ARSK</i>        | <i>GNAO1</i>   | <i>BTRC</i>      |
| <i>C1orf52</i>     | <i>ART3</i>        | <i>GNB1L</i>   | <i>BZW1</i>      |
| <i>C1orf68</i>     | <i>ART4</i>        | <i>GNE</i>     | <i>C10orf105</i> |
| <i>C1QTNF1-AS1</i> | <i>ASAH2</i>       | <i>GNG4</i>    | <i>C10orf67</i>  |
| <i>C1QTNF3</i>     | <i>ASAH2B</i>      | <i>GNG5</i>    | <i>C10orf82</i>  |
| <i>C1RL</i>        | <i>ASAP1</i>       | <i>GNL3L</i>   | <i>C11orf1</i>   |

|              |         |          |             |
|--------------|---------|----------|-------------|
| C20orf194    | ASB1    | GNPTG    | C11orf21    |
| C21orf58     | ASB14   | GOLGA3   | C11orf54    |
| C21orf91     | ASB15   | GOLGA7B  | C11orf74    |
| C2CD2        | ASB4    | GOSR1    | C11orf87    |
| C2CD2L       | ASB5    | GP6      | C11orf98    |
| C2CD4A       | ASB7    | GPAT4    | C12orf40    |
| C2CD4C       | ASB8    | GPATCH2L | C12orf49    |
| C2orf49      | ASCC1   | GPI      | C12orf66    |
| C2orf50      | ASCC3   | GPLD1    | C12orf74    |
| C2orf68      | ASDURF  | GPR12    | C14orf132   |
| C2orf72      | ASF1B   | GPR150   | C15orf40    |
| C2orf80      | ASNA1   | GPR151   | C15orf61    |
| C3           | ASNSD1  | GPR157   | C16orf54    |
| C3orf14      | ASPA    | GPR180   | C16orf72    |
| C3orf67      | ASPH    | GPR26    | C16orf87    |
| C3orf70      | ASPHD2  | GPR55    | C16orf95    |
| C4orf33      | ASPN    | GPR63    | C17orf75    |
| C4orf46      | ASPSCR1 | GPRC5A   | C18orf21    |
| C4orf54      | ASRGL1  | GPRC5B   | C18orf54    |
| C5AR2        | ASTN1   | GRAMD1B  | C19orf12    |
| C5orf15      | ASTN2   | GRAP2    | C19orf47    |
| C5orf22      | ASXL1   | GRB2     | C1GALT1     |
| C5orf24      | ASXL2   | GRHL1    | C1GALT1C1   |
| C5orf30      | ASXL3   | GRIK3    | C1orf115    |
| C5orf46      | ATAD1   | GRM6     | C1orf116    |
| C5orf51      | ATAD2   | GRWD1    | C1orf198    |
| C5orf63      | ATAD2B  | GTDC1    | C1orf216    |
| C6           | ATAD5   | GTF2F1   | C1orf226    |
| C6orf118     | ATAT1   | GTF2H1   | C1orf35     |
| C6orf120     | ATCAY   | GTF3C1   | C1orf43     |
| C6orf141     | ATE1    | GTF3C4   | C1orf52     |
| C6orf89      | ATF2    | GTPBP1   | C1QTNF1-AS1 |
| C8A          | ATF5    | GUCY1A1  | C1QTNF3     |
| C8orf31      | ATF6    | GZMM     | C1RL        |
| C8orf33      | ATF7    | H2AFV    | C20orf194   |
| C8orf34-AS1  | ATF7IP  | H2AFY    | C21orf58    |
| C8orf37      | ATG10   | H3F3A    | C21orf91    |
| C8orf44-SGK3 | ATG12   | HACD3    | C2CD2       |
| C9orf135     | ATG13   | HAS2     | C2CD2L      |
| C9orf153     | ATG14   | HBS1L    | C2CD4A      |
| C9orf47      | ATG16L1 | HCAR1    | C2CD4C      |
| C9orf64      | ATG2B   | HCAR3    | C2orf49     |
| C9orf72      | ATG3    | HDAC2    | C2orf50     |
| CA12         | ATG5    | HDAC3    | C2orf68     |

|          |          |            |              |
|----------|----------|------------|--------------|
| CA13     | ATG7     | HDHD2      | C2orf72      |
| CA5B     | ATIC     | HDLBP      | C2orf80      |
| CA8      | ATL1     | HEATR3     | C3           |
| CABLES1  | ATL2     | HECTD1     | C3orf67      |
| CABP1    | ATL3     | HENMT1     | C3orf70      |
| CABYR    | ATM      | HES7       | C4orf33      |
| CACNA1C  | ATMIN    | HEXA       | C4orf46      |
| CACNB1   | ATN1     | HEXB       | C4orf50      |
| CACNB3   | ATOH7    | HEXIM2     | C4orf54      |
| CACNB4   | ATOH8    | HHAT       | C5AR2        |
| CACNG8   | ATP10A   | HHIPL1     | C5orf15      |
| CACUL1   | ATP10B   | HIF3A      | C5orf22      |
| CADM1    | ATP10D   | HIP1       | C5orf24      |
| CADM2    | ATP11A   | HIPK2      | C5orf30      |
| CALB1    | ATP11B   | HIST1H4C   | C5orf46      |
| CALB2    | ATP11C   | HIST2H2AA3 | C5orf51      |
| CALCOCO2 | ATP1A2   | HIST2H4B   | C5orf63      |
| CALCRL   | ATP1B4   | HIST4H4    | C6           |
| CALHM3   | ATP2B1   | HJURP      | C6orf118     |
| CALHM4   | ATP2B3   | HLA-DOA    | C6orf120     |
| CALHM5   | ATP2B4   | HLCS       | C6orf141     |
| CALM1    | ATP2C1   | HLTF       | C6orf58      |
| CALM3    | ATP5F1A  | HMGB1      | C6orf89      |
| CALN1    | ATP5F1E  | HMGB2      | C8A          |
| CALU     | ATP5IF1  | HMGNI      | C8orf31      |
| CAMK4    | ATP5MC1  | HNRNPF     | C8orf33      |
| CAMKK1   | ATP5MC3  | HOMEZ      | C8orf34-AS1  |
| CAMKK2   | ATP5MG   | HOXA1      | C8orf37      |
| CAMSAP2  | ATP5MPL  | HOXA13     | C8orf44-SGK3 |
| CAMTA1   | ATP5PB   | HOXA2      | C9orf135     |
| CAND1    | ATP5PF   | HOXC5      | C9orf153     |
| CANX     | ATP6V0A2 | HOXD13     | C9orf47      |
| CAP1     | ATP6V0D1 | HS1BP3     | C9orf64      |
| CAPN11   | ATP6V0D2 | HS3ST2     | C9orf72      |
| CAPN5    | ATP6V0E1 | HS3ST3B1   | CA12         |
| CAPN6    | ATP6V0E2 | HS6ST1     | CA13         |
| CAPN7    | ATP6V1A  | HSD17B13   | CA8          |
| CAPN8    | ATP6V1C2 | HSP90B1    | CABLES1      |
| CAPN9    | ATP6V1E1 | HSPA12B    | CABP1        |
| CAPRIN1  | ATP6V1G1 | HSPA14     | CABYR        |
| CAPRIN2  | ATP7A    | HSPA6      | CACNA1C      |
| CAPS2    | ATP7B    | HSPBP1     | CACNB1       |
| CAPZA2   | ATP8A1   | IARS       | CACNB3       |
| CARD8    | ATP8A2   | ICMT       | CACNB4       |



|         |          |            |          |
|---------|----------|------------|----------|
| CARF    | ATP8B2   | ICOSLG     | CACNG8   |
| CARM1   | ATP8B4   | ID1        | CACUL1   |
| CASC3   | ATP9B    | IDS        | CADM1    |
| CASC4   | ATPAF2   | IER5       | CADM2    |
| CASD1   | ATR      | IFFO2      | CADM3    |
| CASK    | ATRNL    | IFIT2      | CALB1    |
| CASKIN1 | ATRNL1   | IFIT3      | CALB2    |
| CASKIN2 | ATRX     | IFNAR1     | CALCOCO2 |
| CASP10  | ATXN1    | IFNE       | CALCRL   |
| CASP3   | ATXN1L   | IFT22      | CALHM3   |
| CASP9   | ATXN7    | IFT74      | CALHM4   |
| CASQ2   | ATXN7L1  | IGF1R      | CALHM5   |
| CASR    | ATXN7L3B | IGF2       | CALM1    |
| CAST    | AURKC    | IGF2R      | CALML4   |
| CASTOR3 | AUTS2    | IGFN1      | CALN1    |
| CASZ1   | AVL9     | IKZF4      | CALR     |
| CAV2    | AVP11    | IL17D      | CALU     |
| CAVIN3  | AVPR1A   | IL17RA     | CAMK2D   |
| CAVIN4  | AWAT1    | IL22RA1    | CAMK4    |
| CBFB    | AXL      | IL3RA      | CAMKK1   |
| CBL     | AZI2     | IL6R       | CAMKK2   |
| CBLB    | AZIN1    | ILRUN      | CAMSAP2  |
| CBLL1   | B3GALNT1 | IMPDH1     | CAMTA1   |
| CBLN2   | B3GALNT2 | IMPG2      | CAND1    |
| CBR4    | B3GALT1  | INHBB      | CANX     |
| CBWD1   | B3GALT2  | INO80E     | CAP1     |
| CBWD2   | B3GALT5  | INPP4A     | CAPN11   |
| CBWD3   | B3GALT6  | INPP5E     | CAPN5    |
| CBWD5   | B3GAT2   | INSIG1     | CAPN6    |
| CBWD6   | B3GLCT   | INSM1      | CAPN7    |
| CBX2    | B3GNT2   | INTS6L     | CAPN8    |
| CBX5    | B3GNT5   | IP6K1      | CAPN9    |
| CBY1    | B4GALT1  | IPPK       | CAPRIN1  |
| CC2D1B  | B4GALT5  | IQCK       | CAPRIN2  |
| CCDC113 | B4GALT6  | IRAK3      | CAPS2    |
| CCDC114 | B4GALT7  | IREB2      | CAPZA2   |
| CCDC117 | B9D1     | IRF2BP2    | CARD8    |
| CCDC121 | BAALC    | IRF8       | CARF     |
| CCDC125 | BAAT     | ISL2       | CARM1    |
| CCDC126 | BABAM2   | ISY1-RAB43 | CASC4    |
| CCDC127 | BACE1    | ITGA3      | CASD1    |
| CCDC13  | BACE2    | ITGA4      | CASK     |
| CCDC141 | BACH1    | ITM2B      | CASKIN1  |
| CCDC148 | BACH2    | ITPK1      | CASP10   |

|         |         |          |         |
|---------|---------|----------|---------|
| CCDC150 | BAG2    | ITPRIP   | CASP16P |
| CCDC155 | BAG3    | ITSN1    | CASP3   |
| CCDC171 | BAG4    | JAGN1    | CASP9   |
| CCDC173 | BAG5    | JDP2     | CASQ2   |
| CCDC185 | BAHCC1  | JMJD4    | CASR    |
| CCDC186 | BAHD1   | JPH1     | CAST    |
| CCDC198 | BAIAP2  | JPH3     | CASTOR3 |
| CCDC33  | BAMBI   | JPH4     | CASZ1   |
| CCDC36  | BANF1   | JPT2     | CAV2    |
| CCDC47  | BARD1   | KAAG1    | CAVIN3  |
| CCDC50  | BATF2   | KANK1    | CAVIN4  |
| CCDC71L | BAZ1B   | KARS     | CBFB    |
| CCDC80  | BAZ2A   | KATNBL1  | CBL     |
| CCDC85C | BAZ2B   | KBTBD11  | CBLB    |
| CCDC88A | BBOF1   | KBTBD8   | CBLL1   |
| CCL22   | BBS10   | KCMF1    | CBLN1   |
| CCL28   | BBS7    | KCNA7    | CBLN2   |
| CCM2L   | BBS9    | KCNAB2   | CBR4    |
| CCN1    | BBX     | KCNG4    | CBWD1   |
| CCN2    | BCAP29  | KCNJ11   | CBWD2   |
| CCN3    | BCAR3   | KCNJ5    | CBWD3   |
| CCN4    | BCAS4   | KCNV1    | CBWD5   |
| CCNB1   | BCAT1   | KCTD10   | CBWD6   |
| CCNC    | BCCIP   | KCTD12   | CBX2    |
| CCND1   | BCDIN3D | KCTD15   | CBX5    |
| CCND2   | BCHE    | KDEL2    | CC2D1B  |
| CCNG2   | BCKDHB  | KDM5A    | CCDC113 |
| CCNL2   | BCL10   | KDM6B    | CCDC114 |
| CCNT2   | BCL11A  | KIAA1191 | CCDC117 |
| CCNYL1  | BCL11B  | KIAA1257 | CCDC121 |
| CCP110  | BCL2    | KIAA1549 | CCDC125 |
| CCR1    | BCL2L11 | KIAA1614 | CCDC126 |
| CCR6    | BCL2L13 | KIF1A    | CCDC127 |
| CCR7    | BCL2L15 | KIF1B    | CCDC13  |
| CCS     | BCL2L2  | KIF3C    | CCDC134 |
| CCSER1  | BCL6B   | KLC1     | CCDC141 |
| CCSER2  | BCL7A   | KLF3     | CCDC142 |
| CCT4    | BCL7C   | KLF8     | CCDC148 |
| CCT5    | BCLAF1  | KLHL15   | CCDC150 |
| CCT6B   | BCLAF3  | KLHL36   | CCDC155 |
| CCT7    | BCO2    | KMO      | CCDC160 |
| CD164   | BCOR    | KMT2D    | CCDC170 |
| CD180   | BCORL1  | KPNA2    | CCDC171 |
| CD1C    | BDH1    | KREMEN1  | CCDC173 |

|          |         |              |         |
|----------|---------|--------------|---------|
| CD226    | BDH2    | KRTAP10-1    | CCDC185 |
| CD28     | BDNF    | KRTAP4-9     | CCDC186 |
| CD2AP    | BDP1    | L2HGDH       | CCDC198 |
| CD2BP2   | BEND2   | LAMA5        | CCDC25  |
| CD300A   | BEND3   | LDHB         | CCDC30  |
| CD300E   | BEND4   | LEF1         | CCDC33  |
| CD36     | BEND6   | LEPR         | CCDC36  |
| CD38     | BEST1   | LEPROT       | CCDC47  |
| CD4      | BEST3   | LETM1        | CCDC50  |
| CD44     | BET1    | LGALS1       | CCDC57  |
| CD47     | BET1L   | LGR6         | CCDC71  |
| CD55     | BHLHE22 | LHFPL2       | CCDC71L |
| CD68     | BHLHE40 | LHPP         | CCDC80  |
| CD79A    | BHLHE41 | LHX4         | CCDC85C |
| CD83     | BHMT    | LIF          | CCDC88A |
| CD84     | BHMT2   | LIN28B       | CCDC93  |
| CD93     | BICC1   | LINC01124    | CCL22   |
| CD99L2   | BICD1   | LINC02312    | CCL28   |
| CDAN1    | BICD2   | LIX1L        | CCM2L   |
| CDC27    | BICRAL  | LMBR1        | CCN1    |
| CDC34    | BID     | LMLN         | CCN2    |
| CDC37L1  | BIRC2   | LMO3         | CCN3    |
| CDC42BPA | BIRC3   | LNPEP        | CCN4    |
| CDC42EP3 | BIRC5   | LOC100129215 | CCNB1   |
| CDC42EP4 | BIVM    | LOC105375614 | CCNC    |
| CDC42SE2 | BLID    | LONRF3       | CCND1   |
| CDC5L    | BLMH    | LPIN2        | CCND2   |
| CDC6     | BLNK    | LPP          | CCNG2   |
| CDC73    | BLOC1S3 | LRFN2        | CCNJ    |
| CDCA2    | BLOC1S4 | LRIG2        | CCNL2   |
| CDCA7L   | BLOC1S5 | LRP2         | CCNT2   |
| CDH1     | BLOC1S6 | LRP4         | CCNY    |
| CDH19    | BLVRA   | LRP8         | CCNYL1  |
| CDH2     | BMERB1  | LRPAP1       | CCP110  |
| CDH5     | BMI1    | LRRC20       | CCR1    |
| CDH6     | BMP1    | LRRC31       | CCR6    |
| CDHR2    | BMP10   | LRRC32       | CCR7    |
| CDK14    | BMP2    | LRRC41       | CCSAP   |
| CDK15    | BMP2K   | LRRC8B       | CCSER1  |
| CDK17    | BMP3    | LRRFIP1      | CCSER2  |
| CDK18    | BMP5    | LRRN1        | CCT3    |
| CDK19    | BMP6    | LTBR         | CCT4    |
| CDK2     | BMP8A   | LTO1         | CCT5    |
| CDK5R1   | BMPER   | LUC7L        | CCT6B   |

|          |        |           |          |
|----------|--------|-----------|----------|
| CDK6     | BMPR1A | LURAP1    | CCT7     |
| CDK8     | BMPR1B | LYRM4     | CD164    |
| CDKL4    | BMPR2  | LYZ       | CD180    |
| CDKL5    | BMS1   | MAATS1    | CD1C     |
| CDKN1B   | BMT2   | MAFG      | CD1D     |
| CDKN1C   | BNC1   | MAK       | CD226    |
| CDKN2AIP | BNC2   | MAP2K3    | CD28     |
| CDKN2B   | BNIP2  | MAP2K7    | CD2AP    |
| CDON     | BNIP3  | MAP4      | CD2BP2   |
| CDPF1    | BNIP3L | MAP7D1    | CD300A   |
| CDR1     | BOD1   | MAP9      | CD300E   |
| CDR2L    | BOD1L1 | MAPK13    | CD36     |
| CDS1     | BOD1L2 | MAPK1IP1L | CD38     |
| CDS2     | BOLA3  | MAPK6     | CD4      |
| CDV3     | BOLL   | MAPKBP1   | CD44     |
| CDY1     | BORCS5 | MAPRE2    | CD47     |
| CDY1B    | BORCS7 | MARC1     | CD55     |
| CDYL2    | BORCS8 | MARCH4    | CD79A    |
| CEACAM19 | BPIFB2 | MARF1     | CD83     |
| CEACAM21 | BPTF   | MASP1     | CD84     |
| CEBPD    | BRAP   | MASTL     | CD93     |
| CEBPG    | BRCA1  | MAU2      | CD99L2   |
| CELF1    | BRCC3  | MBD3      | CDAN1    |
| CELF4    | BRD4   | MBIP      | CDC14B   |
| CELF5    | BRD7   | MBNL1     | CDC25C   |
| CEMIP2   | BRI3   | MBNL3     | CDC27    |
| CENPA    | BRI3BP | MBOAT2    | CDC34    |
| CENPC    | BRINP3 | MBTD1     | CDC37L1  |
| CENPF    | BRIP1  | MCC       | CDC42BPA |
| CENPI    | BRIX1  | MCFD2     | CDC42EP3 |
| CENPJ    | BRMS1L | MCTP2     | CDC42EP4 |
| CENPL    | BROX   | MDH2      | CDC42SE2 |
| CENPM    | BRPF1  | MEAK7     | CDC5L    |
| CENPN    | BRPF3  | MECP2     | CDC6     |
| CENPQ    | BRWD1  | MED12     | CDCA2    |
| CEP104   | BRWD3  | MED7      | CDCA7L   |
| CEP126   | BSN    | MEF2D     | CDH1     |
| CEP128   | BTAF1  | METTL22   | CDH11    |
| CEP162   | BTBD1  | METTL24   | CDH18    |
| CEP250   | BTBD10 | MFAP2     | CDH19    |
| CEP295   | BTBD17 | MFHAS1    | CDH2     |
| CEP350   | BTBD19 | MFNG      | CDH23    |
| CEP44    | BTBD7  | MFSD6     | CDH6     |
| CEP55    | BTBD9  | MGA       | CDH7     |

|         |           |         |          |
|---------|-----------|---------|----------|
| CEP57   | BTC       | MGAT1   | CDHR2    |
| CEP57L1 | BTD       | MGMT    | CDK1     |
| CEP68   | BTF3      | MIEF2   | CDK14    |
| CEP70   | BTF3L4    | MINDY2  | CDK15    |
| CEP72   | BTG1      | MIP     | CDK17    |
| CEP78   | BTK       | MIS12   | CDK19    |
| CEP83   | BTLA      | MITD1   | CDK2     |
| CEP89   | BTN1A1    | MKLN1   | CDK2AP1  |
| CEP97   | BTN3A1    | MLKL    | CDK5R1   |
| CERCAM  | BTNL8     | MMP13   | CDK6     |
| CERS1   | BTNL9     | MOCS3   | CDK8     |
| CERS2   | BTRC      | MORF4L2 | CDKL4    |
| CERS5   | BUB1      | MPP3    | CDKN1B   |
| CETP    | BUB3      | MPPED1  | CDKN1C   |
| CFAP161 | BVES      | MRC2    | CDKN2AIP |
| CFAP20  | BYSL      | MRE11   | CDKN2B   |
| CFAP298 | BZW1      | MRGBP   | CDO1     |
| CFAP299 | C10orf105 | MRGPRF  | CDON     |
| CFAP300 | C10orf53  | MRPS14  | CDPF1    |
| CFAP97  | C10orf67  | MRPS23  | CDR2L    |
| CFD     | C10orf88  | MRPS33  | CDS1     |
| CFHR3   | C10orf90  | MS4A15  | CDS2     |
| CFHR4   | C11orf1   | MSANTD1 | CDV3     |
| CFL2    | C11orf49  | MSANTD3 | CDY1     |
| CFLAR   | C11orf54  | MSX2    | CDY1B    |
| CGGBP1  | C11orf58  | MTA3    | CDYL2    |
| CGREF1  | C11orf65  | MT-CO2  | CEACAM19 |
| CHAF1B  | C11orf68  | MT-CYB  | CEBPD    |
| CHD1    | C11orf72  | MTF1    | CEBPG    |
| CHD2    | C11orf74  | MTG1    | CELF1    |
| CHD5    | C11orf87  | MTMR1   | CELF4    |
| CHD6    | C11orf91  | MTMR3   | CEMIP2   |
| CHD7    | C11orf98  | MTMR8   | CENPA    |
| CHD8    | C12orf29  | MTO1    | CENPBD1  |
| CHDH    | C12orf4   | MTOR    | CENPC    |
| CHERP   | C12orf40  | MXRA8   | CENPF    |
| CHGB    | C12orf43  | MYADM   | CENPH    |
| CHIC1   | C12orf49  | MYCBP   | CENPI    |
| CHKA    | C12orf50  | MYCBP2  | CENPJ    |
| CHMP3   | C12orf60  | MYO9B   | CENPL    |
| CHMP4B  | C12orf65  | MYOM2   | CENPM    |
| CHN1    | C12orf66  | MYOZ3   | CENPN    |
| CHORDC1 | C12orf73  | MYPN    | CENPP    |
| CHP1    | C12orf74  | MZF1    | CENPQ    |

|             |           |         |         |
|-------------|-----------|---------|---------|
| CHRA1       | C12orf75  | N4BP2   | CENPT   |
| CHRD1       | C14orf119 | N4BP3   | CEP104  |
| CHRM2       | C14orf28  | N6AMT1  | CEP126  |
| CHRM3       | C14orf39  | NAA30   | CEP128  |
| CHRNA5      | C15orf40  | NAIP    | CEP162  |
| CHRNA6      | C15orf41  | NARF    | CEP295  |
| CHRNE       | C15orf48  | NCMAP   | CEP350  |
| CHST11      | C15orf61  | NCOR1   | CEP44   |
| CHST3       | C15orf65  | NCOR2   | CEP55   |
| CHST7       | C16orf46  | NCS1    | CEP57   |
| CHSY1       | C16orf70  | NDC1    | CEP57L1 |
| CHSY3       | C16orf72  | NDE1    | CEP68   |
| CHTF8       | C16orf87  | NDRG1   | CEP70   |
| CHURC1      | C17orf107 | NDST1   | CEP72   |
| CHURC1-FNTB | C17orf75  | NDUFA10 | CEP78   |
| CIAO2A      | C18orf21  | NDUFA2  | CEP83   |
| CIAPIN1     | C18orf54  | NDUFA7  | CEP89   |
| CILP        | C18orf63  | NDUFA9  | CEP97   |
| CIP2A       | C19orf12  | NDUFC2  | CERCAM  |
| CIPC        | C19orf47  | NDUFV3  | CERS1   |
| CISD1       | C1D       | NEBL    | CERS2   |
| CISD2       | C1GALT1   | NEFM    | CERS5   |
| CISH        | C1GALT1C1 | NEIL2   | CETP    |
| CIT         | C1orf109  | NEU1    | CFAP161 |
| CITED2      | C1orf112  | NEU3    | CFAP20  |
| CKAP2       | C1orf116  | NF1     | CFAP298 |
| CKAP5       | C1orf122  | NFATC4  | CFAP299 |
| CKS1B       | C1orf131  | NFE2L3  | CFAP300 |
| CLASP1      | C1orf141  | NFIA    | CFAP44  |
| CLASP2      | C1orf162  | NFIB    | CFAP97  |
| CLCC1       | C1orf198  | NFYA    | CFD     |
| CLCN3       | C1orf21   | NHLRC2  | CFHR3   |
| CLCN5       | C1orf210  | NHSL1   | CFHR4   |
| CLDN1       | C1orf35   | NIBAN1  | CFL2    |
| CLDN11      | C1orf50   | NIFK    | CFLAR   |
| CLDN12      | C1orf52   | NIP7    | CGGBP1  |
| CLDN16      | C1QL3     | NIPAL1  | CGREF1  |
| CLDN19      | C1QTNF3   | NIPAL2  | CHAF1B  |
| CLDN22      | C1QTNF7   | NIPAL3  | CHCHD2  |
| CLDN23      | C1QTNF9   | NIPBL   | CHD1    |
| CLDND1      | C1RL      | NIT1    | CHD2    |
| CLEC16A     | C20orf144 | NKAIN1  | CHD5    |
| CLEC17A     | C20orf187 | NKD1    | CHD6    |
| CLEC1A      | C20orf194 | NKRF    | CHD7    |

|        |           |          |             |
|--------|-----------|----------|-------------|
| CLEC4E | C20orf202 | NKTR     | CHD8        |
| CLEC4F | C21orf58  | NKX6-2   | CHDH        |
| CLEC4M | C21orf91  | NLRP2    | CHERP       |
| CLEC5A | C22orf23  | NLRP3    | CHGB        |
| CLGN   | C22orf42  | NME6     | CHIC1       |
| CLIC2  | C2CD2     | NOL4L    | CHID1       |
| CLIC4  | C2CD2L    | NOL9     | CHKA        |
| CLIC5  | C2CD3     | NOP2     | CHML        |
| CLINT1 | C2CD4A    | NOS1     | CHMP3       |
| CLIP4  | C2CD6     | NOTCH1   | CHMP4B      |
| CLMN   | C2orf42   | NOVA2    | CHN1        |
| CLN5   | C2orf66   | NOX4     | CHORDC1     |
| CLN8   | C2orf68   | NPC1     | CHP1        |
| CLNK   | C2orf69   | NPEPPS   | CHP2        |
| CLPB   | C2orf72   | NPHS1    | CHRA1       |
| CLSPN  | C2orf73   | NPR3     | CHRD1       |
| CLSTN1 | C2orf80   | NR1D2    | CHRFAM7A    |
| CLSTN2 | C2orf88   | NR6A1    | CHRM2       |
| CLU    | C3        | NRBP2    | CHRM3       |
| CLVS2  | C3orf14   | NRIP3    | CHRNA4      |
| CLYBL  | C3orf38   | NSF      | CHRNA5      |
| CMBL   | C3orf67   | NT5C1A   | CHRNA6      |
| CMC1   | C3orf70   | NT5DC3   | CHRNE       |
| CMIP   | C3orf80   | NTAN1    | CHST10      |
| CMSS1  | C4orf19   | NTN1     | CHST11      |
| CMTM3  | C4orf3    | NTPCR    | CHST14      |
| CMTM4  | C4orf33   | NTRK2    | CHST3       |
| CMTM5  | C4orf36   | NTRK3    | CHST7       |
| CMTM6  | C4orf45   | NTSR1    | CHSY1       |
| CMTM8  | C4orf46   | NUDCD2   | CHSY3       |
| CNBP   | C4orf50   | NUDT15   | CHTF8       |
| CNDP2  | C4orf54   | NUDT16   | CHURC1      |
| CNIH3  | C5        | NUDT16L1 | CHURC1-FNTB |
| CNKSR3 | C5AR1     | NUDT19   | CIAO2A      |
| CNNM2  | C5AR2     | NUFIP2   | CIAPIN1     |
| CNNM3  | C5orf24   | NUGGC    | CILP        |
| CNNM4  | C5orf30   | NUP188   | CINP        |
| CNOT1  | C5orf38   | NUP62CL  | CIP2A       |
| CNOT2  | C5orf46   | NUTF2    | CISD1       |
| CNOT4  | C5orf47   | NXF1     | CISD2       |
| CNOT6  | C5orf49   | NXN      | CIT         |
| CNOT6L | C5orf51   | NXPH3    | CITED2      |
| CNOT7  | C5orf63   | ODC1     | CKAP5       |
| CNP    | C5orf64   | ODF2L    | CKS1B       |



|             |              |          |         |
|-------------|--------------|----------|---------|
| CNPY3       | C6orf118     | ONECUT2  | CLASP1  |
| CNPY4       | C6orf120     | OPA3     | CLASP2  |
| CNR1        | C6orf132     | OPN3     | CLCC1   |
| CNR2        | C6orf136     | OPRM1    | CLCN3   |
| CNST        | C6orf141     | ORC2     | CLCN5   |
| CNTD1       | C6orf223     | ORC5     | CLDN1   |
| CNTF        | C6orf58      | ORC6     | CLDN11  |
| CNTLN       | C6orf62      | ORMDL1   | CLDN12  |
| CNTN1       | C6orf89      | ORMDL2   | CLDN14  |
| CNTN2       | C7           | OSBP2    | CLDN16  |
| CNTNAP5     | C7orf25      | OSBPL2   | CLDN19  |
| COA5        | C7orf26      | OSGEPL1  | CLDN22  |
| COA7        | C8A          | OSTF1    | CLDND1  |
| COBL        | C8orf31      | OTUD3    | CLEC12B |
| COBLL1      | C8orf33      | OTULIN   | CLEC16A |
| COG2        | C8orf34-AS1  | OTULINL  | CLEC17A |
| COG5        | C8orf37      | OXA1L    | CLEC1A  |
| COG6        | C8orf44-SGK3 | OXCT1    | CLEC4C  |
| COIL        | C8orf86      | P2RX1    | CLEC4E  |
| COL20A1     | C8orf88      | P2RX5    | CLEC4F  |
| COL21A1     | C9orf116     | PABPN1   | CLEC4M  |
| COL26A1     | C9orf152     | PADI2    | CLEC5A  |
| COL27A1     | C9orf153     | PAFAH1B1 | CLGN    |
| COL28A1     | C9orf40      | PAFAH1B2 | CLIC1   |
| COL4A1      | C9orf47      | PAG1     | CLIC2   |
| COL4A3      | C9orf64      | PALM     | CLIC5   |
| COL4A4      | C9orf72      | PANK2    | CLINT1  |
| COL4A6      | C9orf78      | PANK3    | CLMN    |
| COL5A2      | C9orf85      | PAPLN    | CLN8    |
| COL6A5      | CA1          | PAPSS1   | CLNK    |
| COL9A2      | CA10         | PARP15   | CLNS1A  |
| COLEC11     | CA12         | PARVG    | CLPB    |
| COMMD2      | CA13         | PATE2    | CLPTM1  |
| COMMD3-BMI1 | CA2          | PATZ1    | CLSPN   |
| COMMD5      | CA3          | PAX2     | CLSTN1  |
| COMMD9      | CA8          | PAX7     | CLSTN2  |
| COMTD1      | CAAP1        | PBX1     | CLTC    |
| COPS2       | CAB39        | PCBP1    | CLU     |
| COPS7A      | CAB39L       | PCBP2    | CLVS2   |
| COPS8       | CABCOCO1     | PCDH1    | CLYBL   |
| COPZ1       | CABP7        | PCDH7    | CMBL    |
| COQ7        | CABYR        | PCID2    | CMC1    |
| CORIN       | CACNA1I      | PCSK7    | CMIP    |
| CORO1A      | CACNA2D1     | PCSK9    | CMSS1   |

|          |          |         |         |
|----------|----------|---------|---------|
| CORO1C   | CACNA2D2 | PCYT1A  | CMTM3   |
| CORO7    | CACNB1   | PDCD11  | CMTM4   |
| COX15    | CACNB4   | PDE2A   | CMTM6   |
| COX19    | CACNG2   | PDE9A   | CMTM8   |
| COX7A2L  | CACNG4   | PDF     | CNBP    |
| COX8C    | CACNG7   | PDIA6   | CNDP2   |
| CPD      | CACNG8   | PDK1    | CNIH3   |
| CPE      | CACUL1   | PDLIM2  | CNIH4   |
| CPEB3    | CAD      | PDLIM4  | CNKSR3  |
| CPEB4    | CADM1    | PDZD8   | CNNM2   |
| CPED1    | CADM2    | PER1    | CNNM3   |
| CPLX4    | CALB1    | PEX11A  | CNNM4   |
| CPM      | CALCOCO2 | PEX19   | CNOT1   |
| CPNE8    | CALCR    | PEX5L   | CNOT2   |
| CPPED1   | CALCRL   | PEX7    | CNOT4   |
| CPS1     | CALHM4   | PFKFB3  | CNOT6   |
| CPSF6    | CALHM5   | PFN2    | CNOT6L  |
| CPT1A    | CALM1    | PGAM5   | CNOT7   |
| CPT2     | CALM3    | PGAP3   | CNP     |
| CRABP2   | CALML3   | PGP     | CNPY3   |
| CRB1     | CALML4   | PGR     | CNPY4   |
| CRB2     | CALN1    | PHAX    | CNR1    |
| CRB3     | CALR     | PHC3    | CNR2    |
| CREB1    | CALU     | PHF24   | CNRIP1  |
| CREB5    | CALY     | PHLDA3  | CNST    |
| CREBL2   | CAMK1D   | PHOX2B  | CNTD1   |
| CREG2    | CAMK2A   | PHTF2   | CNTF    |
| CREM     | CAMK2D   | PI15    | CNTLN   |
| CRHBP    | CAMK4    | PI4K2A  | CNTN1   |
| CRHR1    | CAMKK2   | PIAS2   | CNTN2   |
| CRIPT    | CAMKMT   | PIAS4   | CNTNAP5 |
| CRISPLD2 | CAMLG    | PIDD1   | COA5    |
| CRKL     | CAMSAP1  | PIFO    | COA7    |
| CRPPA    | CAMSAP2  | PIGP    | COBL    |
| CRTAP    | CAMTA1   | PIK3IP1 | COBLL1  |
| CRTC1    | CAND1    | PIK3R3  | COG2    |
| CRTC3    | CAND2    | PIKFYVE | COG5    |
| CRX      | CAP1     | PIMREG  | COG6    |
| CRY1     | CAP2     | PIP5KL1 | COL12A1 |
| CRYBG3   | CAPN13   | PITPNA  | COL20A1 |
| CRYZ     | CAPN5    | PITPNM2 | COL21A1 |
| CSAG1    | CAPN6    | PKNOX1  | COL26A1 |
| CSDC2    | CAPN7    | PLA2G5  | COL27A1 |
| CSDE1    | CAPN8    | PLAAT3  | COL28A1 |

|           |          |          |             |
|-----------|----------|----------|-------------|
| CSE1L     | CAPNS2   | PLAGL2   | COL4A1      |
| CSF1      | CAPRN1   | PLBD2    | COL4A3      |
| CSF2RA    | CAPS2    | PLEKHA7  | COL4A4      |
| CSF3      | CAPSL    | PLEKHB2  | COL4A5      |
| CSH2      | CAPZA1   | PLEKHG4B | COL4A6      |
| CSKMT     | CAPZA2   | PLEKHH1  | COL6A5      |
| CSNK1A1   | CAPZB    | PLEKHM3  | COL9A2      |
| CSNK1A1L  | CARD11   | PLK1     | COLEC11     |
| CSNK1D    | CARD16   | PLPP7    | COMMD2      |
| CSNK1G1   | CARD18   | PLPPR4   | COMMD3-BMI1 |
| CSNK2A1   | CARD8    | PLXNA1   | COMMD5      |
| CSPP1     | CARF     | PMFBP1   | COMMD9      |
| CSRNP1    | CARHSP1  | PNLIPRP3 | COMTD1      |
| CSRNP3    | CARMIL1  | PNMA8A   | COPS2       |
| CST3      | CARNMT1  | PNO1     | COPS8       |
| CSTF2     | CASC1    | PNPLA3   | COPZ1       |
| CSTF2T    | CASC4    | PNRC1    | COQ7        |
| CSTF3     | CASK     | POLE     | CORIN       |
| CT45A5    | CASP1    | POLM     | CORO1A      |
| CTBP2     | CASP10   | POLR1A   | CORO1C      |
| CTBS      | CASP2    | POM121   | CORO7       |
| CTCF      | CASP3    | POTED    | COX15       |
| CTCFL     | CASP4    | POTEI    | COX18       |
| CTDSPL    | CASP5    | PPARGC1B | COX19       |
| CTDSPL2   | CASP7    | PPFIA3   | COX6B1      |
| CTIF      | CASP9    | PPIF     | COX7A2L     |
| CTNNA2    | CASQ2    | PPIL6    | COX8C       |
| CTNNA3    | CAST     | PPM1H    | CPA4        |
| CTNNB1    | CAT      | PPP1CB   | CPD         |
| CTNNBIP1  | CATSPER2 | PPP1R3F  | CPE         |
| CTNNBL1   | CAV1     | PPP1R7   | CPEB3       |
| CTPS2     | CAV2     | PPP2R3B  | CPEB4       |
| CTSB      | CAVIN2   | PQLC1    | CPED1       |
| CTSC      | CAVIN3   | PRDM1    | CPLANE2     |
| CTSE      | CAVIN4   | PRDM2    | CPM         |
| CTTN      | CBFA2T3  | PRDM6    | CPNE8       |
| CTTNBP2NL | CBFB     | PRDX1    | CPPED1      |
| CTU1      | CBL      | PRELID2  | CPS1        |
| CUEDC1    | CBLB     | PRELID3B | CPSF6       |
| CUL3      | CBLL1    | PREX1    | CPT1A       |
| CUL5      | CBLN1    | PRKAB2   | CPT2        |
| CUX1      | CBLN2    | PRKDC    | CRABP2      |
| CUX2      | CBLN4    | PRMT8    | CRB1        |
| CWF19L1   | CBR4     | PROP1    | CRB2        |

|          |                |           |          |
|----------|----------------|-----------|----------|
| CWF19L2  | CBS            | PRORP     | CREB1    |
| CXADR    | CBWD1          | PROSER3   | CREB5    |
| CXCL11   | CBWD2          | PRPF3     | CREBL2   |
| CXCL12   | CBWD3          | PRPH2     | CREBZF   |
| CXCL14   | CBWD5          | PRR12     | CREG2    |
| CXCL17   | CBWD6          | PRRC2C    | CRELD2   |
| CXCR5    | CBX1           | PRSS23    | CREM     |
| CXorf21  | CBX3           | PRTG      | CRHBP    |
| CXorf38  | CBX4           | PRX       | CRHR1    |
| CXorf56  | CBX5           | PSMA2     | CRIPT    |
| CXXC4    | CBX8           | PSMA5     | CRISP3   |
| CYB561   | CC2D1B         | PSMD11    | CRISPLD1 |
| CYB561D1 | CC2D2B         | PSMG2     | CRISPLD2 |
| CYB5D1   | CCAR1          | PSMG4     | CRKL     |
| CYB5R1   | CCBE1          | PTCHD3    | CRNKL1   |
| CYB5R4   | CCDC110        | PTDSS1    | CROT     |
| CYBA     | CCDC112        | PTGES     | CRP      |
| CYBRD1   | CCDC113        | PTGR2     | CRPPA    |
| CYCS     | CCDC117        | PTK6      | CRTAP    |
| CYHR1    | CCDC121        | PTP4A1    | CRTC1    |
| CYP20A1  | CCDC126        | PTPN11    | CRTC3    |
| CYP24A1  | CCDC127        | PTPN14    | CRX      |
| CYP27C1  | CCDC14         | PTPN9     | CRY1     |
| CYP2A7   | CCDC141        | PTPRD     | CRYBG3   |
| CYP2B6   | CCDC148        | PTPRN2    | CRYZ     |
| CYP2C8   | CCDC149        | PURG      | CSDE1    |
| CYP2F1   | CCDC152        | PWP2      | CSE1L    |
| CYP3A5   | CCDC169-SOHLH2 | PYGO1     | CSF1     |
| CYP4F11  | CCDC170        | PYROXD1   | CSF2RA   |
| CYP4V2   | CCDC171        | QKI       | CSF3     |
| CYP4X1   | CCDC173        | QSER1     | CSH2     |
| CYP7A1   | CCDC174        | QSOX1     | CSNK1A1  |
| CYP7B1   | CCDC175        | RAB11FIP3 | CSNK1A1L |
| CYSLTR2  | CCDC177        | RAB15     | CSNK1G1  |
| CYSTM1   | CCDC181        | RAB33B    | CSNK2A1  |
| CYTH3    | CCDC186        | RAB3B     | CSPP1    |
| CYTIP    | CCDC191        | RAB3IP    | CSRNP1   |
| DAAM1    | CCDC198        | RAB43     | CSRNP3   |
| DAAM2    | CCDC24         | RAB5B     | CST3     |
| DAB2IP   | CCDC25         | RAB5C     | CSTF2T   |
| DACT1    | CCDC3          | RAB6B     | CSTF3    |
| DAG1     | CCDC30         | RABL6     | CT45A5   |
| DAP      | CCDC32         | RAC1      | CTBP2    |
| DARS2    | CCDC34         | RAD23A    | CTBS     |

|                |                |                 |                 |
|----------------|----------------|-----------------|-----------------|
| <i>DAXX</i>    | <i>CCDC40</i>  | <i>RAD51C</i>   | <i>CTCF</i>     |
| <i>DAZAP1</i>  | <i>CCDC43</i>  | <i>RALGAPA2</i> | <i>CTCFL</i>    |
| <i>DBN1</i>    | <i>CCDC47</i>  | <i>RANBP10</i>  | <i>CTDSP1</i>   |
| <i>DBNL</i>    | <i>CCDC50</i>  | <i>RAP1B</i>    | <i>CTDSP2</i>   |
| <i>DBT</i>     | <i>CCDC57</i>  | <i>RAP2B</i>    | <i>CTDSPL</i>   |
| <i>DCAF11</i>  | <i>CCDC58</i>  | <i>RAP2C</i>    | <i>CTDSPL2</i>  |
| <i>DCAF12</i>  | <i>CCDC59</i>  | <i>RAPH1</i>    | <i>CTIF</i>     |
| <i>DCAF5</i>   | <i>CCDC6</i>   | <i>RARS</i>     | <i>CTNNA2</i>   |
| <i>DCAF7</i>   | <i>CCDC68</i>  | <i>RASA2</i>    | <i>CTNNA3</i>   |
| <i>DCAKD</i>   | <i>CCDC7</i>   | <i>RASA3</i>    | <i>CTNNB1</i>   |
| <i>DCANP1</i>  | <i>CCDC71L</i> | <i>RASGEF1A</i> | <i>CTNNBIP1</i> |
| <i>DCBLD2</i>  | <i>CCDC74A</i> | <i>RASGRP3</i>  | <i>CTNNBL1</i>  |
| <i>DCDC1</i>   | <i>CCDC74B</i> | <i>RASSF4</i>   | <i>CTPS2</i>    |
| <i>DCLK1</i>   | <i>CCDC77</i>  | <i>RASSF6</i>   | <i>CTR9</i>     |
| <i>DCLRE1A</i> | <i>CCDC80</i>  | <i>RAVER2</i>   | <i>CTSB</i>     |
| <i>DCLRE1C</i> | <i>CCDC85A</i> | <i>RB1</i>      | <i>CTSC</i>     |
| <i>DCP2</i>    | <i>CCDC85C</i> | <i>RBFA</i>     | <i>CTSE</i>     |
| <i>DCTN5</i>   | <i>CCDC88A</i> | <i>RBFOX1</i>   | <i>CTTN</i>     |
| <i>DCTN6</i>   | <i>CCDC88C</i> | <i>RBFOX2</i>   | <i>CTU1</i>     |
| <i>DCUN1D1</i> | <i>CCDC90B</i> | <i>RBM19</i>    | <i>CUEDC1</i>   |
| <i>DCUN1D3</i> | <i>CCDC91</i>  | <i>RBM22</i>    | <i>CUL3</i>     |
| <i>DCUN1D4</i> | <i>CCDC93</i>  | <i>RBM28</i>    | <i>CUL5</i>     |
| <i>DCUN1D5</i> | <i>CCDC96</i>  | <i>RBM48</i>    | <i>CUX1</i>     |
| <i>DDA1</i>    | <i>CCL1</i>    | <i>RBM7</i>     | <i>CUX2</i>     |
| <i>DDB2</i>    | <i>CCL22</i>   | <i>RBMX2</i>    | <i>CWF19L1</i>  |
| <i>DDHD1</i>   | <i>CCL28</i>   | <i>RBSN</i>     | <i>CWF19L2</i>  |
| <i>DDHD2</i>   | <i>CCL7</i>    | <i>RCBTB1</i>   | <i>CXADR</i>    |
| <i>DDI2</i>    | <i>CCL8</i>    | <i>RCL1</i>     | <i>CXCL11</i>   |
| <i>DDIT4</i>   | <i>CCN1</i>    | <i>RCN2</i>     | <i>CXCL12</i>   |
| <i>DDR1</i>    | <i>CCN2</i>    | <i>RELB</i>     | <i>CXCL14</i>   |
| <i>DDRGK1</i>  | <i>CCN3</i>    | <i>REPS2</i>    | <i>CXCL17</i>   |
| <i>DDX17</i>   | <i>CCN4</i>    | <i>RFC2</i>     | <i>CXCR5</i>    |
| <i>DDX18</i>   | <i>CCNB1</i>   | <i>RFLNB</i>    | <i>CXorf38</i>  |
| <i>DDX19A</i>  | <i>CCNC</i>    | <i>RHBDL3</i>   | <i>CXorf56</i>  |
| <i>DDX19B</i>  | <i>CCND1</i>   | <i>RHEBL1</i>   | <i>CXXC4</i>    |
| <i>DDX20</i>   | <i>CCND2</i>   | <i>RHOH</i>     | <i>CYB561</i>   |
| <i>DDX21</i>   | <i>CCNDBP1</i> | <i>RHPN2</i>    | <i>CYB561D1</i> |
| <i>DDX3Y</i>   | <i>CCNF</i>    | <i>RIC1</i>     | <i>CYB5D1</i>   |
| <i>DDX4</i>    | <i>CCNG1</i>   | <i>RIMBP2</i>   | <i>CYB5R1</i>   |
| <i>DDX42</i>   | <i>CCNG2</i>   | <i>RIMS4</i>    | <i>CYB5R4</i>   |
| <i>DDX43</i>   | <i>CCNH</i>    | <i>RIOK2</i>    | <i>CYBA</i>     |
| <i>DDX46</i>   | <i>CCNI</i>    | <i>RLIM</i>     | <i>CYBRD1</i>   |
| <i>DDX55</i>   | <i>CCNI2</i>   | <i>RMND5A</i>   | <i>CYCS</i>     |
| <i>DDX6</i>    | <i>CCNJ</i>    | <i>RNASE7</i>   | <i>CYHR1</i>    |

|          |         |         |         |
|----------|---------|---------|---------|
| DECR1    | CCNL2   | RNF121  | CYP1B1  |
| DEDD     | CCNO    | RNF144B | CYP20A1 |
| DEFB107A | CCNT1   | RNF149  | CYP24A1 |
| DEFB107B | CCNT2   | RNF165  | CYP27C1 |
| DEFB134  | CCNY    | RNF168  | CYP2A7  |
| DELE1    | CCPG1   | RNF19B  | CYP2B6  |
| DENND2A  | CCR1    | RNF212  | CYP2C8  |
| DENND3   | CCR10   | RNF213  | CYP2F1  |
| DENND5B  | CCR5    | RNF24   | CYP3A5  |
| DENND6B  | CCR6    | RNF40   | CYP4F11 |
| DENR     | CCR7    | RNMT    | CYP4F12 |
| DEPDC1   | CCR9    | RNPEPL1 | CYP4V2  |
| DEPTOR   | CCRL2   | RO60    | CYP4X1  |
| DERA     | CCSAP   | ROPN1   | CYP51A1 |
| DERL1    | CCSER1  | RORB    | CYP7A1  |
| DERL2    | CCSER2  | RORC    | CYP7B1  |
| DERL3    | CCT4    | RPL10   | CYSLTR2 |
| DFFA     | CCT6B   | RPL10A  | CYSRT1  |
| DGAT2L6  | CCZ1    | RPL14   | CYTH3   |
| DGCR2    | CCZ1B   | RPL15   | CYTH4   |
| DGCR6L   | CD109   | RPL19   | DAAM1   |
| DGCR8    | CD163L1 | RPL21   | DAAM2   |
| DGKB     | CD164   | RPL26   | DAB2IP  |
| DGKE     | CD180   | RPL28   | DACT1   |
| DGKG     | CD1B    | RPL31   | DAOA    |
| DGKH     | CD1C    | RPL36A  | DBN1    |
| DGKI     | CD1D    | RPL39L  | DBNL    |
| DHCR24   | CD200R1 | RPL5    | DBT     |
| DHDDS    | CD226   | RPL7    | DCAF12  |
| DHRS4    | CD244   | RPL7A   | DCAF17  |
| DHTKD1   | CD248   | RPL7L1  | DCAF5   |
| DHX15    | CD274   | RPL9    | DCAF8L1 |
| DHX35    | CD276   | RPLP1   | DCAKD   |
| DHX36    | CD28    | RPS15   | DCANP1  |
| DHX8     | CD2AP   | RPS15A  | DCBLD2  |
| DIAPH2   | CD2BP2  | RPS20   | DCDC1   |
| DICER1   | CD300E  | RPS21   | DCK     |
| DIDO1    | CD302   | RPS27   | DCLK1   |
| DIMT1    | CD36    | RPS6KA2 | DCLRE1A |
| DIO2     | CD38    | RPS8    | DCLRE1C |
| DIP2B    | CD3D    | RPTOR   | DCP2    |
| DIPK1A   | CD3EAP  | RPUUSD1 | DCTN5   |
| DIPK2B   | CD3G    | RRAGD   | DCTN6   |
| DIRAS1   | CD44    | RRM2    | DCUN1D1 |

|                |                 |                 |                 |
|----------------|-----------------|-----------------|-----------------|
| <i>DIRAS2</i>  | <i>CD46</i>     | <i>RRN3</i>     | <i>DCUN1D3</i>  |
| <i>DIRAS3</i>  | <i>CD47</i>     | <i>RSL24D1</i>  | <i>DCUN1D4</i>  |
| <i>DIS3</i>    | <i>CD53</i>     | <i>RTL6</i>     | <i>DCUN1D5</i>  |
| <i>DIS3L2</i>  | <i>CD55</i>     | <i>RTL9</i>     | <i>DDA1</i>     |
| <i>DISP2</i>   | <i>CD5L</i>     | <i>RUNX1T1</i>  | <i>DDAH1</i>    |
| <i>DKK2</i>    | <i>CD83</i>     | <i>RUNX3</i>    | <i>DDB2</i>     |
| <i>DLD</i>     | <i>CD84</i>     | <i>RYR2</i>     | <i>DDHD1</i>    |
| <i>DLEU7</i>   | <i>CD86</i>     | <i>S100A10</i>  | <i>DDHD2</i>    |
| <i>DLG2</i>    | <i>CD93</i>     | <i>SAE1</i>     | <i>DDI2</i>     |
| <i>DLG3</i>    | <i>CD96</i>     | <i>SALL4</i>    | <i>DDIT4</i>    |
| <i>DLGAP1</i>  | <i>CD99L2</i>   | <i>SAMD14</i>   | <i>DDR1</i>     |
| <i>DLGAP3</i>  | <i>CDADC1</i>   | <i>SAP30BP</i>  | <i>DDRGK1</i>   |
| <i>DLST</i>    | <i>CDC14A</i>   | <i>SAP30L</i>   | <i>DDX17</i>    |
| <i>DLX1</i>    | <i>CDC14B</i>   | <i>SASH3</i>    | <i>DDX18</i>    |
| <i>DLX3</i>    | <i>CDC23</i>    | <i>SAT1</i>     | <i>DDX19A</i>   |
| <i>DMBX1</i>   | <i>CDC25A</i>   | <i>SATB1</i>    | <i>DDX19B</i>   |
| <i>DMPK</i>    | <i>CDC25B</i>   | <i>SCAMP2</i>   | <i>DDX20</i>    |
| <i>DMRT2</i>   | <i>CDC27</i>    | <i>SCD5</i>     | <i>DDX21</i>    |
| <i>DMRT3</i>   | <i>CDC37</i>    | <i>SCN2B</i>    | <i>DDX3Y</i>    |
| <i>DMRTA1</i>  | <i>CDC37L1</i>  | <i>SCNN1A</i>   | <i>DDX42</i>    |
| <i>DMWD</i>    | <i>CDC42BPA</i> | <i>SCNN1G</i>   | <i>DDX43</i>    |
| <i>DMXL1</i>   | <i>CDC42BPB</i> | <i>SCO1</i>     | <i>DDX46</i>    |
| <i>DNAAF1</i>  | <i>CDC42EP3</i> | <i>SDHAF2</i>   | <i>DDX55</i>    |
| <i>DNAAF2</i>  | <i>CDC42EP4</i> | <i>SEBOX</i>    | <i>DDX6</i>     |
| <i>DNAH14</i>  | <i>CDC42SE2</i> | <i>SEMA4G</i>   | <i>DECR1</i>    |
| <i>DNAJA2</i>  | <i>CDC5L</i>    | <i>SEMA6A</i>   | <i>DEFB107A</i> |
| <i>DNAJB12</i> | <i>CDC6</i>     | <i>SEPSECS</i>  | <i>DEFB107B</i> |
| <i>DNAJB14</i> | <i>CDC7</i>     | <i>SEPTIN10</i> | <i>DEFB134</i>  |
| <i>DNAJB4</i>  | <i>CDC73</i>    | <i>SERBP1</i>   | <i>DELE1</i>    |
| <i>DNAJB6</i>  | <i>CDCA2</i>    | <i>SERPINB5</i> | <i>DENND2A</i>  |
| <i>DNAJC10</i> | <i>CDCA5</i>    | <i>SERPINE1</i> | <i>DENND3</i>   |
| <i>DNAJC16</i> | <i>CDCA7</i>    | <i>SET</i>      | <i>DENND5B</i>  |
| <i>DNAJC18</i> | <i>CDCP1</i>    | <i>SETX</i>     | <i>DENND6B</i>  |
| <i>DNAJC19</i> | <i>CDH1</i>     | <i>SF3B3</i>    | <i>DENR</i>     |
| <i>DNAJC22</i> | <i>CDH10</i>    | <i>SFT2D2</i>   | <i>DEPDC1</i>   |
| <i>DNAJC24</i> | <i>CDH11</i>    | <i>SGCB</i>     | <i>DEPTOR</i>   |
| <i>DNAJC30</i> | <i>CDH12</i>    | <i>SGCD</i>     | <i>DERL1</i>    |
| <i>DNAJC5</i>  | <i>CDH13</i>    | <i>SGPL1</i>    | <i>DERL2</i>    |
| <i>DNAJC6</i>  | <i>CDH17</i>    | <i>SGSM2</i>    | <i>DERL3</i>    |
| <i>DNAL1</i>   | <i>CDH18</i>    | <i>SGTB</i>     | <i>DESI2</i>    |
| <i>DNM3</i>    | <i>CDH19</i>    | <i>SH3BP2</i>   | <i>DGAT2L6</i>  |
| <i>DNMT3A</i>  | <i>CDH2</i>     | <i>SH3BP4</i>   | <i>DGCR2</i>    |
| <i>DNMT3B</i>  | <i>CDH23</i>    | <i>SH3D19</i>   | <i>DGCR8</i>    |
| <i>DNTT</i>    | <i>CDH24</i>    | <i>SH3RF2</i>   | <i>DGKB</i>     |



|         |            |          |        |
|---------|------------|----------|--------|
| DNTTIP2 | CDH26      | SH3RF3   | DGKE   |
| DOCK10  | CDH6       | SHC1     | DGKH   |
| DOCK5   | CDH7       | SHH      | DGKI   |
| DOCK7   | CDH8       | SHLD1    | DGLUCY |
| DOK3    | CDHR1      | SHOX     | DHCR24 |
| DOK6    | CDK1       | SIAE     | DHDDS  |
| DONSON  | CDK12      | SIK2     | DHODH  |
| DOT1L   | CDK13      | SIRT7    | DHRS4  |
| DPEP2   | CDK14      | SKI      | DHTKD1 |
| DPF2    | CDK15      | SKIDA1   | DHX15  |
| DPH2    | CDK17      | SLC12A2  | DHX35  |
| DPH6    | CDK2       | SLC14A1  | DHX36  |
| DPM1    | CDK5       | SLC17A4  | DIAPH2 |
| DPP10   | CDK5R1     | SLC17A8  | DICER1 |
| DPP6    | CDK5R2     | SLC18A1  | DIDO1  |
| DPP8    | CDK5RAP2   | SLC19A1  | DIMT1  |
| DPPA3   | CDK6       | SLC19A3  | DIO2   |
| DPY19L1 | CDKL1      | SLC24A4  | DIP2B  |
| DPY19L3 | CDKL2      | SLC25A38 | DIPK1A |
| DPY19L4 | CDKL3      | SLC26A1  | DIPK2B |
| DPYSL2  | CDKN1A     | SLC26A7  | DIRAS1 |
| DPYSL3  | CDKN1B     | SLC27A4  | DIRAS2 |
| DPYSL4  | CDKN2AIP   | SLC29A1  | DIRAS3 |
| DPYSL5  | CDKN2AIPNL | SLC35F1  | DIS3   |
| DR1     | CDKN2B     | SLC35F2  | DIS3L2 |
| DRAXIN  | CDKN3      | SLC38A7  | DISC1  |
| DRD1    | CDON       | SLC39A1  | DISP2  |
| DSCAM   | CDPF1      | SLC39A14 | DKK2   |
| DSCC1   | CDR1       | SLC3A1   | DLD    |
| DSG1    | CDS2       | SLC43A3  | DLEU7  |
| DSG2    | CDT1       | SLC44A1  | DLG2   |
| DSG3    | CDV3       | SLC44A2  | DLG3   |
| DST     | CDX2       | SLC4A4   | DLGAP1 |
| DSTN    | CDX4       | SLC6A11  | DLGAP3 |
| DTD2    | CDY1       | SLC6A7   | DLST   |
| DTNA    | CDY1B      | SLC7A6OS | DLX1   |
| DTWD2   | CDYL       | SLC8A2   | DLX3   |
| DTX3    | CDYL2      | SLC9A7   | DMAC2  |
| DTX3L   | CEACAM1    | SLCO3A1  | DMBX1  |
| DUSP18  | CEACAM5    | SLCO5A1  | DMPK   |
| DUSP19  | CEACAM6    | SLFN12L  | DMRT2  |
| DUSP22  | CEACAM7    | SLITRK3  | DMRT3  |
| DUSP3   | CEACAM8    | SLX4IP   | DMRTA1 |
| DUSP6   | CEBPG      | SMAD7    | DNAAF1 |

|                |            |          |          |
|----------------|------------|----------|----------|
| DVL2           | CEBPZOS    | SMARCA5  | DNAAF2   |
| DYNC1I1        | CELF1      | SMARCD1  | DNAH14   |
| DYNC1I2        | CELF2      | SMC1A    | DNAJA2   |
| DYNC1LI2       | CELF3      | SMC4     | DNAJB12  |
| DYNLL2         | CELF5      | SMCHD1   | DNAJB14  |
| DYRK1A         | CEMIP      | SMG1     | DNAJB2   |
| DYRK2          | CEMIP2     | SMIM19   | DNAJB4   |
| DYRK3          | CENPA      | SMPD3    | DNAJB6   |
| DZANK1         | CENPB      | SMPDL3B  | DNAJC10  |
| E2F2           | CENPC      | SMURF2   | DNAJC16  |
| E2F3           | CENPE      | SNORC    | DNAJC18  |
| E2F7           | CENPF      | SNRNP27  | DNAJC19  |
| EAH1           | CENPH      | SNRPE    | DNAJC22  |
| EBF3           | CENPI      | SNX22    | DNAJC24  |
| EBPL           | CENPL      | SNX4     | DNAJC27  |
| ECD            | CENPN      | SNX8     | DNAJC3   |
| ECPAS          | CENPO      | SNX9     | DNAJC30  |
| ECT2           | CENPP      | SOBP     | DNAJC5   |
| EDA            | CENPS-CORT | SOGA1    | DNAJC6   |
| EDEM1          | CENPU      | SORL1    | DNAL1    |
| EDEM3          | CENPW      | SOX1     | DNASE1L1 |
| EDNRA          | CEP104     | SP140L   | DNM3     |
| EDNRB          | CEP120     | SP6      | DNMT3A   |
| EEF1AKMT2      | CEP126     | SP7      | DNMT3B   |
| EEF1AKMT4-ECE2 | CEP128     | SP8      | DNTT     |
| EEF1AKNMT      | CEP135     | SPAG6    | DNTTIP2  |
| EEF2           | CEP162     | SPATA17  | DOCK10   |
| EEFSEC         | CEP164     | SPATA2L  | DOCK7    |
| EFCAB1         | CEP170     | SPECC1   | DOK3     |
| EFCAB11        | CEP350     | SPEN     | DOK6     |
| EFCAB14        | CEP41      | SPG7     | DOK7     |
| EFCAB2         | CEP44      | SPIB     | DONSON   |
| EFHC2          | CEP55      | SPOCK2   | DOT1L    |
| EFNA1          | CEP57      | SPOUT1   | DPEP2    |
| EFNA2          | CEP57L1    | SPRY3    | DPF2     |
| EFNB2          | CEP63      | SPSB1    | DPH2     |
| EFR3A          | CEP68      | SPTBN2   | DPH3     |
| EFR3B          | CEP72      | SRARP    | DPH6     |
| EGF            | CEP76      | SRCAP    | DPM1     |
| EGFLAM         | CEP78      | SRD5A1   | DPP10    |
| EGFR           | CEP83      | SRD5A3   | DPP6     |
| EHD1           | CEP85L     | SREK1IP1 | DPP8     |
| EHD3           | CEP89      | SRF      | DPPA3    |
| EHD4           | CEP97      | SRFBP1   | DPY19L1  |

|                 |                |                   |                 |
|-----------------|----------------|-------------------|-----------------|
| <i>EHF</i>      | <i>CEPT1</i>   | <i>SRI</i>        | <i>DPY19L3</i>  |
| <i>EHMT1</i>    | <i>CERK</i>    | <i>SRMS</i>       | <i>DPY19L4</i>  |
| <i>EID1</i>     | <i>CERKL</i>   | <i>SRPX2</i>      | <i>DPYD</i>     |
| <i>EIF1</i>     | <i>CERS2</i>   | <i>SRSF3</i>      | <i>DPYSL2</i>   |
| <i>EIF1AD</i>   | <i>CERS3</i>   | <i>SSR3</i>       | <i>DPYSL3</i>   |
| <i>EIF1AX</i>   | <i>CERS5</i>   | <i>SSR4P1</i>     | <i>DPYSL4</i>   |
| <i>EIF1B</i>    | <i>CERS6</i>   | <i>SSTR1</i>      | <i>DPYSL5</i>   |
| <i>EIF2AK1</i>  | <i>CETN3</i>   | <i>SSX3</i>       | <i>DR1</i>      |
| <i>EIF2AK2</i>  | <i>CFAP161</i> | <i>ST14</i>       | <i>DRAM1</i>    |
| <i>EIF2AK3</i>  | <i>CFAP20</i>  | <i>ST5</i>        | <i>DRAXIN</i>   |
| <i>EIF2B2</i>   | <i>CFAP298</i> | <i>ST6GAL2</i>    | <i>DRD1</i>     |
| <i>EIF2S1</i>   | <i>CFAP300</i> | <i>ST6GALNAC4</i> | <i>DSCAM</i>    |
| <i>EIF2S3</i>   | <i>CFAP43</i>  | <i>STARD3NL</i>   | <i>DSCC1</i>    |
| <i>EIF2S3B</i>  | <i>CFAP44</i>  | <i>STAT5B</i>     | <i>DSG2</i>     |
| <i>EIF3B</i>    | <i>CFAP45</i>  | <i>STK17B</i>     | <i>DSG3</i>     |
| <i>EIF3I</i>    | <i>CFAP47</i>  | <i>STK24</i>      | <i>DST</i>      |
| <i>EIF3J</i>    | <i>CFAP61</i>  | <i>STK25</i>      | <i>DSTN</i>     |
| <i>EIF3M</i>    | <i>CFAP65</i>  | <i>STK35</i>      | <i>DTD2</i>     |
| <i>EIF4E</i>    | <i>CFAP97</i>  | <i>STMN3</i>      | <i>DTL</i>      |
| <i>EIF4E2</i>   | <i>CFD</i>     | <i>STMP1</i>      | <i>DTNA</i>     |
| <i>EIF4E3</i>   | <i>CFH</i>     | <i>STRADA</i>     | <i>DTWD2</i>    |
| <i>EIF4EBP2</i> | <i>CFHR1</i>   | <i>STXBP6</i>     | <i>DTX3</i>     |
| <i>EIF5</i>     | <i>CFHR3</i>   | <i>SUGT1</i>      | <i>DTX3L</i>    |
| <i>EIF5A2</i>   | <i>CFHR4</i>   | <i>SULF1</i>      | <i>DUSP1</i>    |
| <i>EIF5B</i>    | <i>CFL2</i>    | <i>SULT4A1</i>    | <i>DUSP18</i>   |
| <i>EIPR1</i>    | <i>CFLAR</i>   | <i>SUPT16H</i>    | <i>DUSP19</i>   |
| <i>ELAVL1</i>   | <i>CGGBP1</i>  | <i>SUSD1</i>      | <i>DUSP22</i>   |
| <i>ELAVL2</i>   | <i>CGN</i>     | <i>SUV39H2</i>    | <i>DUSP3</i>    |
| <i>ELAVL3</i>   | <i>CGNL1</i>   | <i>SV2B</i>       | <i>DUSP6</i>    |
| <i>ELAVL4</i>   | <i>CGRRF1</i>  | <i>SV2C</i>       | <i>DVL2</i>     |
| <i>ELF3</i>     | <i>CHAC2</i>   | <i>SYMPK</i>      | <i>DYNC1H1</i>  |
| <i>ELF4</i>     | <i>CHAF1B</i>  | <i>SYNCRIP</i>    | <i>DYNC1I1</i>  |
| <i>ELK1</i>     | <i>CHAMP1</i>  | <i>SYNPO2</i>     | <i>DYNC1I2</i>  |
| <i>ELK4</i>     | <i>CHCHD3</i>  | <i>SYP</i>        | <i>DYNC1LI2</i> |
| <i>ELL2</i>     | <i>CHCHD4</i>  | <i>SYT7</i>       | <i>DYNLL2</i>   |
| <i>ELL3</i>     | <i>CHD1</i>    | <i>SZRD1</i>      | <i>DYRK1A</i>   |
| <i>ELMOD2</i>   | <i>CHD1L</i>   | <i>TADA2B</i>     | <i>DYRK2</i>    |
| <i>ELMOD3</i>   | <i>CHD2</i>    | <i>TAOK1</i>      | <i>DYRK3</i>    |
| <i>ELOB</i>     | <i>CHD5</i>    | <i>TAPBP</i>      | <i>DZANK1</i>   |
| <i>ELOC</i>     | <i>CHD6</i>    | <i>TARDBP</i>     | <i>E2F2</i>     |
| <i>ELOVL6</i>   | <i>CHD7</i>    | <i>TASOR</i>      | <i>E2F3</i>     |
| <i>ELP2</i>     | <i>CHD9</i>    | <i>TBC1D16</i>    | <i>E2F7</i>     |
| <i>ELP4</i>     | <i>CHDH</i>    | <i>TBKBP1</i>     | <i>EBF1</i>     |
| <i>EMB</i>      | <i>CHEK1</i>   | <i>TBRG1</i>      | <i>EBF3</i>     |

|          |             |          |                |
|----------|-------------|----------|----------------|
| EMC2     | CHERP       | TCAF2    | EBNA1BP2       |
| EMC3     | CHIC1       | TCEA3    | EBPL           |
| EMC7     | CHIC2       | TCF19    | ECD            |
| EMC8     | CHKA        | TCOF1    | ECHDC3         |
| EML4     | CHL1        | TCP1     | ECPAS          |
| EML5     | CHM         | TCTEX1D1 | ECT2           |
| EML6     | CHML        | TECPR2   | EDA            |
| EMP1     | CHMP1B      | TENM1    | EDEM1          |
| EMX2     | CHMP2B      | TENT4A   | EDEM3          |
| EN1      | CHMP3       | TENT5C   | EDNRA          |
| ENAH     | CHMP5       | TERF2IP  | EDNRB          |
| ENC1     | CHN1        | TEX264   | EED            |
| ENDOD1   | CHN2        | TFAM     | EEF1A1         |
| ENGASE   | CHODL       | TFCP2L1  | EEF1AKMT2      |
| ENO1     | CHORDC1     | TGFBR2   | EEF1AKMT4-ECE2 |
| ENOSF1   | CHPT1       | THAP2    | EEF1AKNMT      |
| ENOX1    | CHRA1       | THAP6    | EEFSEC         |
| ENPEP    | CHRD1       | THRA     | EFCAB1         |
| ENPP5    | CHRM2       | THRAP3   | EFCAB11        |
| ENPP6    | CHRM3       | THY1     | EFCAB14        |
| ENSA     | CHRNA3      | TIFA     | EFCAB2         |
| ENTPD1   | CHRNA4      | TIGD6    | EFHC2          |
| ENTPD3   | CHRNA5      | TIGIT    | EFNA1          |
| ENTPD4   | CHRNA9      | TIMM10B  | EFNA2          |
| ENTPD7   | CHRNE       | TIMM8A   | EFNB2          |
| EOGT     | CHST10      | TLCD5    | EFR3A          |
| EPB41L1  | CHST11      | TLE3     | EFR3B          |
| EPB41L2  | CHST12      | TLK2     | EGF            |
| EPB41L4B | CHST14      | TM9SF3   | EGFLAM         |
| EPB41L5  | CHST2       | TMC2     | EGFR           |
| EPC2     | CHST3       | TMED4    | EHD3           |
| EPHA4    | CHST6       | TMED7    | EHD4           |
| EPHA5    | CHST7       | TMEM106B | EHF            |
| EPHA7    | CHST9       | TMEM11   | EHMT1          |
| EPHA8    | CHSY1       | TMEM120B | EID1           |
| EPHX2    | CHSY3       | TMEM134  | EID2           |
| EPM2AIP1 | CHUK        | TMEM135  | EIF1           |
| EPN1     | CHURC1      | TMEM161B | EIF1AD         |
| EPOR     | CHURC1-FNTB | TMEM184A | EIF1AX         |
| EPPIN    | CIAO1       | TMEM185B | EIF1B          |
| EPS15    | CIAO2A      | TMEM186  | EIF2AK1        |
| EPSTI1   | CIDEB       | TMEM200B | EIF2AK2        |
| ERAL1    | CILP        | TMEM200C | EIF2AK3        |
| ERBB2    | CIPC        | TMEM231  | EIF2B2         |

|            |         |           |          |
|------------|---------|-----------|----------|
| ERBB3      | CIRBP   | TMEM236   | EIF2S3   |
| ERBB4      | CISD1   | TMEM255B  | EIF2S3B  |
| ERC1       | CISD2   | TMEM30A   | EIF3A    |
| ERCC2      | CIT     | TMEM87B   | EIF3H    |
| ERCC4      | CITED2  | TMPRSS13  | EIF3J    |
| ERCC6      | CKAP2   | TMPRSS9   | EIF4E    |
| ERCC6L     | CKAP4   | TNFAIP2   | EIF4E3   |
| ERFE       | CKS1B   | TNFAIP8   | EIF4EBP2 |
| ERG        | CLASP2  | TNFAIP8L1 | EIF4G3   |
| ERI1       | CLCA4   | TNFAIP8L3 | EIF5     |
| ERICH3     | CLCC1   | TNFRSF13C | EIF5A2   |
| ERLIN1     | CLCN3   | TOGARAM2  | EIF5B    |
| ERMAP      | CLCN5   | TOM1L2    | EIPR1    |
| ERMN       | CLCN6   | TOMM40    | ELAVL1   |
| ERMP1      | CLDN1   | TOR1A     | ELAVL2   |
| ERV3-1     | CLDN11  | TOR2A     | ELAVL3   |
| ERVMER34-1 | CLDN12  | TP73      | ELAVL4   |
| ESCO1      | CLDN16  | TPO       | ELF3     |
| ESCO2      | CLDN18  | TPPP      | ELF4     |
| ESF1       | CLDN19  | TRAF1     | ELK1     |
| ESR1       | CLDN22  | TRAF3     | ELK4     |
| ESRP1      | CLDN23  | TRAK1     | ELL2     |
| ESS2       | CLDN8   | TRAM2     | ELL3     |
| ESYT1      | CLEC12A | TRAPPC9   | ELMOD2   |
| ESYT3      | CLEC12B | TRIB1     | ELMOD3   |
| ETFBKMT    | CLEC16A | TRIB2     | ELOC     |
| ETNK1      | CLEC18A | TRIM2     | ELOVL6   |
| ETS1       | CLEC1A  | TRIM38    | ELP4     |
| ETV1       | CLEC1B  | TRIM41    | EMB      |
| ETV3       | CLEC2D  | TRIM44    | EMC2     |
| ETV5       | CLEC4C  | TRIM54    | EMC3     |
| EVI5       | CLEC4D  | TRIM7     | EMC4     |
| EVPLL      | CLEC4E  | TRIM71    | EMC8     |
| EVX1       | CLEC5A  | TRMO      | EML4     |
| EVX2       | CLEC7A  | TRMT10C   | EML5     |
| EXO5       | CLEC9A  | TSC22D1   | EML6     |
| EXOC2      | CLGN    | TSHZ3     | EMP1     |
| EXOC6B     | CLIC1   | TSPAN11   | EMX2     |
| EXOC8      | CLIC2   | TSPAN14   | EN1      |
| EXOSC1     | CLIC4   | TSPAN17   | ENAH     |
| EXOSC10    | CLIC5   | TSPYL2    | ENC1     |
| EXOSC2     | CLIC6   | TSPYL4    | ENDOD1   |
| EXOSC3     | CLINT1  | TSPYL5    | ENGASE   |
| EXOSC6     | CLIP3   | TTC1      | ENOSF1   |

|          |         |           |            |
|----------|---------|-----------|------------|
| EXTL3    | CLIP4   | TTC22     | ENOX1      |
| EYA3     | CLK4    | TTC30A    | ENPEP      |
| EZH1     | CLLU1OS | TTC37     | ENPP5      |
| EZR      | CLMN    | TTC38     | ENPP6      |
| F10      | CLMP    | TTC39A    | ENSA       |
| F7       | CLN8    | TTC39B    | ENTPD1     |
| FAAH     | CLNK    | TTLL7     | ENTPD3     |
| FAAP20   | CLNS1A  | TTYH3     | ENTPD4     |
| FABP2    | CLOCK   | TUBGCP3   | ENTPD5     |
| FADS1    | CLPB    | TULP4     | ENTPD6     |
| FAF1     | CLPTM1L | TUSC3     | ENTPD7     |
| FAF2     | CLPX    | TXLNA     | ENY2       |
| FAHD1    | CLRN1   | TYW5      | EOGT       |
| FAIM2    | CLSPN   | UBA2      | EPB41L1    |
| FAM102A  | CLSTN2  | UBB       | EPB41L4B   |
| FAM102B  | CLSTN3  | UBE2E3    | EPB41L5    |
| FAM104B  | CLTC    | UBE2I     | EPC2       |
| FAM110B  | CLUAP1  | UBE3B     | EPHA4      |
| FAM114A1 | CLUL1   | UBE4A     | EPHA5      |
| FAM114A2 | CLVS2   | UBN2      | EPHA7      |
| FAM117B  | CLYBL   | UBQLN1    | EPHA8      |
| FAM118A  | CMBL    | UBXN10    | EPHX2      |
| FAM120A  | CMC1    | UBXN2B    | EPM2A      |
| FAM122A  | CMKLR1  | UCKL1     | EPM2AIP1   |
| FAM122C  | CMPK1   | UGCG      | EPN1       |
| FAM126B  | CMPK2   | UGGT1     | EPOR       |
| FAM131B  | CMSS1   | UHRF1BP1  | EPS15      |
| FAM135A  | CMTM4   | UHRF1BP1L | EPSTI1     |
| FAM135B  | CMTM6   | UMODL1    | ERAL1      |
| FAM13A   | CMTR1   | UNC45B    | ERBB2      |
| FAM151B  | CMTR2   | UNC50     | ERBB3      |
| FAM155B  | CNBP    | UPK3BL1   | ERBB4      |
| FAM160B1 | CNDP2   | UQCC2     | ERC1       |
| FAM161A  | CNEP1R1 | UQCR10    | ERCC4      |
| FAM162A  | CNGB1   | UQCRFS1   | ERCC6      |
| FAM163A  | CNGB3   | URB1-AS1  | ERFE       |
| FAM167A  | CNIH4   | URM1      | ERG        |
| FAM168A  | CNKSR2  | USP1      | ERI1       |
| FAM168B  | CNKSR3  | USP15     | ERICH3     |
| FAM172A  | CNN1    | USP3      | ERMAP      |
| FAM181B  | CNNM1   | USP35     | ERMN       |
| FAM185A  | CNNM2   | USP4      | ERMP1      |
| FAM193A  | CNNM3   | USP51     | ERV3-1     |
| FAM199X  | CNNM4   | UST       | ERVMER34-1 |

|         |         |         |         |
|---------|---------|---------|---------|
| FAM204A | CNOT1   | UTP4    | ESCO1   |
| FAM214A | CNOT10  | VAPA    | ESCO2   |
| FAM216A | CNOT2   | VAPB    | ESF1    |
| FAM217B | CNOT4   | VASN    | ESR1    |
| FAM219A | CNOT6   | VAX1    | ESRP1   |
| FAM219B | CNOT6L  | VCP     | ESS2    |
| FAM222B | CNOT7   | VENTX   | ESYT1   |
| FAM227A | CNOT8   | VHL     | ESYT3   |
| FAM229B | CNOT9   | VLDLR   | ETFBKMT |
| FAM241A | CNP     | VNN1    | ETNK1   |
| FAM3B   | CNPPD1  | VPS45   | ETS1    |
| FAM53B  | CNPY1   | VSIG4   | ETV1    |
| FAM53C  | CNR1    | VSTM5   | ETV3    |
| FAM71C  | CNR2    | VWA1    | ETV5    |
| FAM81A  | CNST    | WARS    | ETV6    |
| FAM83A  | CNTD1   | WBP11   | EVI5    |
| FAM83F  | CNTF    | WDR20   | EVL     |
| FAM83G  | CNTFR   | WDR4    | EVPLL   |
| FAM89A  | CNTLN   | WDR55   | EVX1    |
| FAM8A1  | CNTN1   | WFIKKN2 | EXO5    |
| FAM91A1 | CNTN2   | WHAMM   | EXOC2   |
| FAM98A  | CNTN3   | WNT2B   | EXOC6B  |
| FAN1    | CNTN5   | WNT4    | EXOC8   |
| FANCA   | CNTN6   | WNT5B   | EXOSC2  |
| FANCB   | CNTNAP3 | WNT7B   | EXOSC3  |
| FANCD2  | CNTNAP5 | WSB1    | EXOSC6  |
| FANCE   | COA1    | WTIP    | EXTL3   |
| FANCF   | COA4    | WWC3    | EYS     |
| FANCM   | COA5    | WWP2    | EZH1    |
| FAR2    | COA7    | XIRP1   | F13A1   |
| FARP1   | COBL    | XKR4    | F2R     |
| FASLG   | COBLL1  | XKR7    | F2RL2   |
| FASN    | COCH    | XRCC5   | F7      |
| FASTKD2 | COG1    | XRCC6   | FAAH    |
| FAT1    | COG5    | XXYLT1  | FAAP20  |
| FAT2    | COG6    | YBX3    | FABP2   |
| FAXDC2  | COIL    | YIPF5   | FADS1   |
| FBLN1   | COL11A1 | YIPF6   | FAF1    |
| FBLN7   | COL12A1 | YPEL1   | FAF2    |
| FBN1    | COL14A1 | YTHDC1  | FAHD1   |
| FBN2    | COL1A1  | YWHAE   | FAHD2A  |
| FBXL16  | COL1A2  | ZADH2   | FAIM2   |
| FBXL18  | COL20A1 | ZBED1   | FAM102A |
| FBXL20  | COL21A1 | ZBTB26  | FAM104A |

|        |             |         |           |
|--------|-------------|---------|-----------|
| FBXL3  | COL22A1     | ZBTB4   | FAM104B   |
| FBXL4  | COL23A1     | ZBTB43  | FAM110B   |
| FBXO21 | COL25A1     | ZBTB7A  | FAM114A2  |
| FBXO22 | COL26A1     | ZBTB7B  | FAM117B   |
| FBXO27 | COL28A1     | ZBTB8A  | FAM118A   |
| FBXO28 | COL3A1      | ZC3H10  | FAM120A   |
| FBXO3  | COL4A1      | ZC3HAV1 | FAM120AOS |
| FBXO30 | COL4A3      | ZCCHC12 | FAM120C   |
| FBXO31 | COL4A4      | ZCCHC4  | FAM122A   |
| FBXO32 | COL5A2      | ZDHHC18 | FAM122C   |
| FBXO33 | COL5A3      | ZFAND2A | FAM126B   |
| FBXO41 | COL6A3      | ZFAT    | FAM135A   |
| FBXO42 | COL6A5      | ZFP37   | FAM135B   |
| FBXO47 | COL7A1      | ZFX     | FAM13A    |
| FBXO8  | COL8A1      | ZFYVE19 | FAM151B   |
| FBXO9  | COL9A1      | ZNF101  | FAM155B   |
| FBXW2  | COL9A2      | ZNF106  | FAM160B1  |
| FBXW8  | COL9A3      | ZNF124  | FAM161A   |
| FCAR   | COLEC10     | ZNF132  | FAM162A   |
| FCF1   | COLEC11     | ZNF146  | FAM163A   |
| FCGR2A | COMMD10     | ZNF155  | FAM163B   |
| FCGR2B | COMMD2      | ZNF169  | FAM167A   |
| FCGR3A | COMMD3-BMI1 | ZNF19   | FAM168A   |
| FCHO2  | COMMD8      | ZNF197  | FAM168B   |
| FCHSD1 | COPA        | ZNF215  | FAM172A   |
| FCN2   | COPS2       | ZNF280D | FAM177A1  |
| FCSK   | COPS3       | ZNF284  | FAM181B   |
| FECH   | COPS4       | ZNF317  | FAM185A   |
| FEM1A  | COPS7B      | ZNF346  | FAM193A   |
| FEM1B  | COPS8       | ZNF396  | FAM199X   |
| FEM1C  | COQ10A      | ZNF417  | FAM204A   |
| FER    | COQ10B      | ZNF430  | FAM214A   |
| FERMT1 | COQ7        | ZNF483  | FAM216A   |
| FERMT3 | CORIN       | ZNF496  | FAM217B   |
| FEZ2   | CORO1C      | ZNF510  | FAM219A   |
| FFAR2  | CORO2A      | ZNF511  | FAM219B   |
| FFAR3  | CORT        | ZNF548  | FAM222B   |
| FGA    | COTL1       | ZNF554  | FAM227A   |
| FGD4   | COX10       | ZNF576  | FAM229B   |
| FGD6   | COX11       | ZNF587B | FAM234B   |
| FGF10  | COX15       | ZNF607  | FAM241A   |
| FGF12  | COX16       | ZNF609  | FAM3B     |
| FGF14  | COX18       | ZNF618  | FAM53B    |
| FGF19  | COX19       | ZNF652  | FAM76A    |



|          |         |        |         |
|----------|---------|--------|---------|
| FGF2     | COX20   | ZNF701 | FAM81A  |
| FGF5     | COX6B1  | ZNF704 | FAM83A  |
| FGF9     | COX6C   | ZNF738 | FAM83F  |
| FGFR1OP  | COX7A2L | ZNF75A | FAM89A  |
| FGFR1OP2 | COX7C   | ZNF778 | FAM8A1  |
| FGR      | COX8C   | ZNF784 | FAM91A1 |
| FHL5     | CPA3    | ZNF792 | FAM98A  |
| FICD     | CPA4    | ZNF793 | FAN1    |
| FIGN     | CPD     | ZNF831 | FANCA   |
| FIGNL1   | CPE     | ZNF845 | FANCB   |
| FILIP1   | CPEB4   | ZNF99  | FANCD2  |
| FIZ1     | CPED1   | ZNRF2  | FANCF   |
| FKBP14   | CPLX1   | ZYG11A | FANCM   |
| FKBP4    | CPLX2   | ZZEF1  | FAR2    |
| FKBP5    | CPLX3   |        | FARP1   |
| FKBP7    | CPLX4   |        | FARSA   |
| FKBP9    | CPM     |        | FASLG   |
| FKTN     | CPN1    |        | FASTKD2 |
| FLNA     | CPN2    |        | FAT2    |
| FLRT2    | CPNE8   |        | FAXC    |
| FLRT3    | CPPED1  |        | FAXDC2  |
| FLT1     | CPQ     |        | FBLN1   |
| FLYWCH2  | CPS1    |        | FBLN7   |
| FMN1     | CPSF2   |        | FBN1    |
| FMNL1    | CPSF3   |        | FBN2    |
| FMR1     | CPSF6   |        | FBN3    |
| FN1      | CPT1A   |        | FBXL15  |
| FN3KRP   | CR1     |        | FBXL16  |
| FNBP1    | CR2     |        | FBXL18  |
| FNBP1L   | CRB1    |        | FBXL20  |
| FNDC10   | CRBN    |        | FBXL3   |
| FNDC3A   | CREB1   |        | FBXL4   |
| FNDC3B   | CREB3   |        | FBXO22  |
| FNDC9    | CREB3L2 |        | FBXO27  |
| FNIP1    | CREB3L4 |        | FBXO28  |
| FNIP2    | CREB5   |        | FBXO3   |
| FNTA     | CREBL2  |        | FBXO30  |
| FNTB     | CREBRF  |        | FBXO31  |
| FOS      | CREG1   |        | FBXO32  |
| FOSL2    | CREG2   |        | FBXO33  |
| FOXA1    | CRELD1  |        | FBXO41  |
| FOXF1    | CREM    |        | FBXO42  |
| FOXJ1    | CRH     |        | FBXO45  |
| FOXL1    | CRIM1   |        | FBXO47  |

|                 |                   |                 |
|-----------------|-------------------|-----------------|
| <i>FOXL2NB</i>  | <i>CRIP3</i>      | <i>FBXO8</i>    |
| <i>FOXN1</i>    | <i>CRIPT</i>      | <i>FBXO9</i>    |
| <i>FOXN2</i>    | <i>CRISP1</i>     | <i>FBXW11</i>   |
| <i>FOXO1</i>    | <i>CRISP2</i>     | <i>FBXW8</i>    |
| <i>FOXO3</i>    | <i>CRISP3</i>     | <i>FCAR</i>     |
| <i>FOXO4</i>    | <i>CRISPLD2</i>   | <i>FCF1</i>     |
| <i>FOXP1</i>    | <i>CRK</i>        | <i>FCGR2A</i>   |
| <i>FOXP2</i>    | <i>CRKL</i>       | <i>FCGR2B</i>   |
| <i>FOXRED1</i>  | <i>CRLF3</i>      | <i>FCGR3A</i>   |
| <i>FPGS</i>     | <i>CRLS1</i>      | <i>FCHO2</i>    |
| <i>FPGT</i>     | <i>CRMP1</i>      | <i>FCHSD1</i>   |
| <i>FPR3</i>     | <i>CRNKL1</i>     | <i>FCN2</i>     |
| <i>FRA10AC1</i> | <i>CROT</i>       | <i>FCRL3</i>    |
| <i>FRAT1</i>    | <i>CRP</i>        | <i>FCSK</i>     |
| <i>FRAT2</i>    | <i>CRPPA</i>      | <i>FECH</i>     |
| <i>FREM2</i>    | <i>CRTAM</i>      | <i>FEM1B</i>    |
| <i>FRK</i>      | <i>CRTAP</i>      | <i>FEM1C</i>    |
| <i>FRMD4B</i>   | <i>CRTC1</i>      | <i>FER</i>      |
| <i>FRMD5</i>    | <i>CRTC3</i>      | <i>FERMT1</i>   |
| <i>FRMD6</i>    | <i>CRX</i>        | <i>FERMT3</i>   |
| <i>FRMPD4</i>   | <i>CRY1</i>       | <i>FEZ1</i>     |
| <i>FRRS1</i>    | <i>CRYBG1</i>     | <i>FEZ2</i>     |
| <i>FRRS1L</i>   | <i>CRYBG3</i>     | <i>FFAR2</i>    |
| <i>FRS2</i>     | <i>CSAD</i>       | <i>FFAR3</i>    |
| <i>FRYL</i>     | <i>CSDE1</i>      | <i>FGA</i>      |
| <i>FSCB</i>     | <i>CSE1L</i>      | <i>FGD4</i>     |
| <i>FSD2</i>     | <i>CSF1R</i>      | <i>FGD6</i>     |
| <i>FSHB</i>     | <i>CSGALNACT1</i> | <i>FGF10</i>    |
| <i>FSTL4</i>    | <i>CSGALNACT2</i> | <i>FGF12</i>    |
| <i>FSTL5</i>    | <i>CSH2</i>       | <i>FGF14</i>    |
| <i>FTO</i>      | <i>CSN1S1</i>     | <i>FGF19</i>    |
| <i>FUBP1</i>    | <i>CSN2</i>       | <i>FGF2</i>     |
| <i>FUCA2</i>    | <i>CSNK1A1</i>    | <i>FGF5</i>     |
| <i>FUNDC2</i>   | <i>CSNK1A1L</i>   | <i>FGF9</i>     |
| <i>FUS</i>      | <i>CSNK1G1</i>    | <i>FGFR1OP</i>  |
| <i>FUT1</i>     | <i>CSNK1G3</i>    | <i>FGFR1OP2</i> |
| <i>FUT10</i>    | <i>CSNK2A1</i>    | <i>FGL1</i>     |
| <i>FUT11</i>    | <i>CSPP1</i>      | <i>FGL2</i>     |
| <i>FUT2</i>     | <i>CSRNP1</i>     | <i>FGR</i>      |
| <i>FUT4</i>     | <i>CSRNP2</i>     | <i>FHL5</i>     |
| <i>FUT8</i>     | <i>CSRNP3</i>     | <i>FIBIN</i>    |
| <i>FUT9</i>     | <i>CST3</i>       | <i>FICD</i>     |
| <i>FXN</i>      | <i>CSTB</i>       | <i>FIGN</i>     |
| <i>FXR1</i>     | <i>CSTF1</i>      | <i>FIGNL1</i>   |

|                |                  |                |
|----------------|------------------|----------------|
| <i>FXYD5</i>   | <i>CSTF2</i>     | <i>FILIP1</i>  |
| <i>FYTTD1</i>  | <i>CSTF2T</i>    | <i>FIZ1</i>    |
| <i>FZD1</i>    | <i>CSTF3</i>     | <i>FKBP14</i>  |
| <i>FZD3</i>    | <i>CT45A5</i>    | <i>FKBP5</i>   |
| <i>FZD4</i>    | <i>CT83</i>      | <i>FKBP7</i>   |
| <i>FZD5</i>    | <i>CTAGE1</i>    | <i>FKBP9</i>   |
| <i>FZD8</i>    | <i>CTAGE8</i>    | <i>FKTN</i>    |
| <i>FZR1</i>    | <i>CTAGE9</i>    | <i>FLI1</i>    |
| <i>G2E3</i>    | <i>CTBP2</i>     | <i>FLNA</i>    |
| <i>G3BP1</i>   | <i>CTBS</i>      | <i>FLRT1</i>   |
| <i>G3BP2</i>   | <i>CTC1</i>      | <i>FLRT2</i>   |
| <i>G6PC</i>    | <i>CTCF</i>      | <i>FLRT3</i>   |
| <i>GAB1</i>    | <i>CTCFL</i>     | <i>FLT1</i>    |
| <i>GAB2</i>    | <i>CTDP1</i>     | <i>FLYWCH2</i> |
| <i>GAB3</i>    | <i>CTDSPL</i>    | <i>FMN1</i>    |
| <i>GABBR2</i>  | <i>CTDSPL2</i>   | <i>FMNL1</i>   |
| <i>GABPA</i>   | <i>CTH</i>       | <i>FMR1</i>    |
| <i>GABRA1</i>  | <i>CTHRC1</i>    | <i>FN1</i>     |
| <i>GABRA3</i>  | <i>CTLA4</i>     | <i>FN3KRP</i>  |
| <i>GABRB1</i>  | <i>CTNNA2</i>    | <i>FNBP1</i>   |
| <i>GABRB3</i>  | <i>CTNNA3</i>    | <i>FNBP1L</i>  |
| <i>GABRG1</i>  | <i>CTNNB1</i>    | <i>FNBP4</i>   |
| <i>GABRG3</i>  | <i>CTNNBIP1</i>  | <i>FNDC10</i>  |
| <i>GABRR1</i>  | <i>CTNNBL1</i>   | <i>FNDC3A</i>  |
| <i>GABRR2</i>  | <i>CTNND2</i>    | <i>FNDC3B</i>  |
| <i>GAD2</i>    | <i>CTNS</i>      | <i>FNDC9</i>   |
| <i>GAGE1</i>   | <i>CTPS2</i>     | <i>FNIP1</i>   |
| <i>GALC</i>    | <i>CTSB</i>      | <i>FNIP2</i>   |
| <i>GALNS</i>   | <i>CTSC</i>      | <i>FNTA</i>    |
| <i>GALNT10</i> | <i>CTSH</i>      | <i>FNTB</i>    |
| <i>GALNT15</i> | <i>CTSL</i>      | <i>FOS</i>     |
| <i>GALNT17</i> | <i>CTSO</i>      | <i>FOSL2</i>   |
| <i>GALNT18</i> | <i>CTSS</i>      | <i>FOXA1</i>   |
| <i>GALNT2</i>  | <i>CTSV</i>      | <i>FOXA2</i>   |
| <i>GALNT3</i>  | <i>CTTN</i>      | <i>FOXF1</i>   |
| <i>GALNT7</i>  | <i>CTTNBP2</i>   | <i>FOXJ1</i>   |
| <i>GALR1</i>   | <i>CTTNBP2NL</i> | <i>FOXL1</i>   |
| <i>GANAB</i>   | <i>CTU1</i>      | <i>FOXL2NB</i> |
| <i>GAPVD1</i>  | <i>CTXN2</i>     | <i>FOXN1</i>   |
| <i>GAR1</i>    | <i>CTXN3</i>     | <i>FOXN2</i>   |
| <i>GAS1</i>    | <i>CUBN</i>      | <i>FOXO1</i>   |
| <i>GAS2</i>    | <i>CUEDC2</i>    | <i>FOXO3</i>   |
| <i>GAS2L3</i>  | <i>CUL1</i>      | <i>FOXO4</i>   |
| <i>GAS5</i>    | <i>CUL3</i>      | <i>FOXP1</i>   |

|                |                 |                 |
|----------------|-----------------|-----------------|
| <i>GAS7</i>    | <i>CUL5</i>     | <i>FOXP2</i>    |
| <i>GAS8</i>    | <i>CUX1</i>     | <i>FOXRED1</i>  |
| <i>GASK1B</i>  | <i>CWC22</i>    | <i>FOXRED2</i>  |
| <i>GATA1</i>   | <i>CWF19L2</i>  | <i>FPGT</i>     |
| <i>GATA4</i>   | <i>CX3CR1</i>   | <i>FPR1</i>     |
| <i>GATA5</i>   | <i>CXADR</i>    | <i>FPR3</i>     |
| <i>GATA6</i>   | <i>CXCL1</i>    | <i>FRA10AC1</i> |
| <i>GATAD1</i>  | <i>CXCL11</i>   | <i>FRAT1</i>    |
| <i>GATAD2A</i> | <i>CXCL12</i>   | <i>FRAT2</i>    |
| <i>GATD3A</i>  | <i>CXCL13</i>   | <i>FREM2</i>    |
| <i>GBA</i>     | <i>CXCL14</i>   | <i>FRG2</i>     |
| <i>GBE1</i>    | <i>CXCL2</i>    | <i>FRG2C</i>    |
| <i>GBGT1</i>   | <i>CXCL3</i>    | <i>FRK</i>      |
| <i>GBP2</i>    | <i>CXCL5</i>    | <i>FRMD3</i>    |
| <i>GBP4</i>    | <i>CXCL8</i>    | <i>FRMD4B</i>   |
| <i>GBX2</i>    | <i>CXCL9</i>    | <i>FRMD6</i>    |
| <i>GCC1</i>    | <i>CXCR2</i>    | <i>FRMPD4</i>   |
| <i>GCG</i>     | <i>CXCR4</i>    | <i>FRRS1</i>    |
| <i>GCLC</i>    | <i>CXorf21</i>  | <i>FRRS1L</i>   |
| <i>GCLM</i>    | <i>CXorf38</i>  | <i>FRS2</i>     |
| <i>GCN1</i>    | <i>CXorf56</i>  | <i>FRYL</i>     |
| <i>GCNT1</i>   | <i>CXXC4</i>    | <i>FSCB</i>     |
| <i>GCNT2</i>   | <i>CXXC5</i>    | <i>FSCN1</i>    |
| <i>GCSAML</i>  | <i>CYB561A3</i> | <i>FSD2</i>     |
| <i>GDA</i>     | <i>CYB561D1</i> | <i>FSHB</i>     |
| <i>GDAP1</i>   | <i>CYB5D2</i>   | <i>FSTL4</i>    |
| <i>GDAP2</i>   | <i>CYB5R2</i>   | <i>FSTL5</i>    |
| <i>GDF9</i>    | <i>CYB5R4</i>   | <i>FTO</i>      |
| <i>GDI1</i>    | <i>CYBB</i>     | <i>FUBP1</i>    |
| <i>GDI2</i>    | <i>CYBRD1</i>   | <i>FUCA2</i>    |
| <i>GDNF</i>    | <i>CYCS</i>     | <i>FUNDC2</i>   |
| <i>GDPD1</i>   | <i>CYP11B1</i>  | <i>FUS</i>      |
| <i>GDPGP1</i>  | <i>CYP19A1</i>  | <i>FUT1</i>     |
| <i>GEM</i>     | <i>CYP1A1</i>   | <i>FUT10</i>    |
| <i>GEMIN2</i>  | <i>CYP1A2</i>   | <i>FUT11</i>    |
| <i>GEMIN6</i>  | <i>CYP20A1</i>  | <i>FUT2</i>     |
| <i>GFAP</i>    | <i>CYP24A1</i>  | <i>FUT4</i>     |
| <i>GFER</i>    | <i>CYP27B1</i>  | <i>FUT8</i>     |
| <i>GFM1</i>    | <i>CYP27C1</i>  | <i>FUT9</i>     |
| <i>GFOD1</i>   | <i>CYP2A7</i>   | <i>FXN</i>      |
| <i>GFPT1</i>   | <i>CYP2C19</i>  | <i>FXR1</i>     |
| <i>GFPT2</i>   | <i>CYP2C8</i>   | <i>FXYP5</i>    |
| <i>GFRA1</i>   | <i>CYP39A1</i>  | <i>FYTTD1</i>   |
| <i>GFRA2</i>   | <i>CYP3A5</i>   | <i>FZD1</i>     |

|          |          |         |
|----------|----------|---------|
| GFRA4    | CYP3A7   | FZD3    |
| GGA1     | CYP4V2   | FZD4    |
| GGA2     | CYP4X1   | FZD5    |
| GGCT     | CYP51A1  | FZD8    |
| GGCX     | CYP7A1   | FZR1    |
| GHITM    | CYP7B1   | G2E3    |
| GHR      | CYP8B1   | G3BP1   |
| GHRH     | CYSLTR1  | G3BP2   |
| GID4     | CYSLTR2  | G6PC    |
| GID8     | CYTIP    | GAB1    |
| GIGYF1   | DAAM1    | GAB2    |
| GIMAP4   | DACH2    | GAB3    |
| GINM1    | DACT2    | GABBR1  |
| GINS2    | DACT3    | GABBR2  |
| GIPC2    | DAP      | GABPA   |
| GIT1     | DAPP1    | GABRA1  |
| GJA1     | DARS     | GABRA3  |
| GJB2     | DAW1     | GABRA4  |
| GJB6     | DAZ1     | GABRB1  |
| GJC1     | DAZ3     | GABRG1  |
| GJC3     | DAZ4     | GABRG3  |
| GK       | DAZAP2   | GABRR1  |
| GK5      | DAZL     | GABRR2  |
| GLA      | DBF4     | GAD2    |
| GLDN     | DBF4B    | GAGE1   |
| GLG1     | DBH      | GALC    |
| GLI2     | DBNL     | GALNS   |
| GLI3     | DBR1     | GALNT10 |
| GLIPR1L2 | DBT      | GALNT15 |
| GLIS3    | DBX2     | GALNT17 |
| GLMN     | DCAF10   | GALNT18 |
| GLO1     | DCAF11   | GALNT2  |
| GLOD4    | DCAF12L1 | GALNT3  |
| GLP2R    | DCAF13   | GALNT6  |
| GLRA2    | DCAF16   | GALNT7  |
| GLRX2    | DCAF17   | GALR1   |
| GLRX5    | DCAF4L1  | GAPVD1  |
| GLS      | DCAF5    | GAR1    |
| GLT8D2   | DCAF8L1  | GAS1    |
| GLUD2    | DCAKD    | GAS2    |
| GLUL     | DCBLD1   | GAS8    |
| GLYAT    | DCBLD2   | GASK1B  |
| GLYCTK   | DCC      | GATA1   |
| GM2A     | DCDC1    | GATA4   |

|         |          |         |
|---------|----------|---------|
| GMD5    | DCHS2    | GATA5   |
| GMEB1   | DCK      | GATA6   |
| GMFB    | DCLK1    | GATAD1  |
| GMNC    | DCLK2    | GATAD2A |
| GMNN    | DCLK3    | GATAD2B |
| GMPR    | DCN      | GATC    |
| GNA13   | DGP2     | GATD3A  |
| GNAI2   | DCPS     | GBA     |
| GNAI3   | DCT      | GBE1    |
| GNAL    | DCTN3    | GBGT1   |
| GNAO1   | DCTN4    | GBP1    |
| GNAQ    | DCTN5    | GBP2    |
| GNAT1   | DCTN6    | GBP4    |
| GNB1    | DCUN1D1  | GBP6    |
| GNB3    | DCUN1D3  | GBX2    |
| GNB4    | DCUN1D4  | GCC1    |
| GNB5    | DCUN1D5  | GCG     |
| GNG11   | DDB2     | GCLC    |
| GNG12   | DDHD1    | GCLM    |
| GNG2    | DDI1     | GCN1    |
| GNG7    | DDI2     | GCNT1   |
| GNL1    | DDIT4L   | GCNT2   |
| GNL3L   | DDN      | GCSAML  |
| GNPAT   | DDO      | GDA     |
| GOLGA1  | DDR1     | GDAP1   |
| GOLGA3  | DDR2     | GDAP2   |
| GOLGA4  | DDX17    | GDF9    |
| GOLGA7  | DDX18    | GDI2    |
| GOLGA7B | DDX19A   | GDPD1   |
| GOLGA8H | DDX19B   | GDPGP1  |
| GOLGA8K | DDX20    | GEM     |
| GOLGA8M | DDX21    | GEMIN2  |
| GOLGA8O | DDX3Y    | GEMIN6  |
| GOLGA8R | DDX4     | GFAP    |
| GOLM1   | DDX46    | GFER    |
| GOLPH3L | DDX5     | GFM1    |
| GOLT1B  | DDX50    | GFOD1   |
| GON4L   | DDX55    | GFPT1   |
| GON7    | DDX60L   | GFPT2   |
| GOPC    | DECR1    | GFRA1   |
| GORASP1 | DEDD2    | GFRA2   |
| GOSR1   | DEF8     | GFRA4   |
| GP5     | DEFB107A | GGA1    |
| GPAM    | DEFB107B | GGA2    |

|          |         |          |
|----------|---------|----------|
| GPATCH2  | DEFB119 | GGCT     |
| GPATCH2L | DEFB125 | GGCX     |
| GPATCH8  | DEGS1   | GHITM    |
| GPBP1    | DELE1   | GHR      |
| GPC6     | DENND1A | GHRH     |
| GPCPD1   | DENND1B | GHSR     |
| GPD1     | DENND2C | GID4     |
| GPD2     | DENND2D | GID8     |
| GPFR1    | DENND4B | GIGYF1   |
| GPI      | DENND5B | GIMAP4   |
| GPKOW    | DENND6A | GINM1    |
| GPM6A    | DENR    | GINS2    |
| GPM6B    | DEPDC1  | GIPC2    |
| GPN2     | DEPDC1B | GIT1     |
| GPNMB    | DEPTOR  | GJA1     |
| GPR107   | DERA    | GJA3     |
| GPR12    | DERL1   | GJB2     |
| GPR135   | DERL2   | GJB4     |
| GPR137B  | DESI2   | GJB6     |
| GPR143   | DET1    | GJC1     |
| GPR15    | DEXI    | GJC3     |
| GPR151   | DFFA    | GK       |
| GPR160   | DFFB    | GK5      |
| GPR17    | DGAT2   | GLA      |
| GPR173   | DGCR2   | GLDN     |
| GPR176   | DGKB    | GLG1     |
| GPR180   | DGKE    | GLI2     |
| GPR22    | DGKH    | GLI3     |
| GPR25    | DGKI    | GLIPR1   |
| GPR26    | DGKQ    | GLIPR1L2 |
| GPR27    | DGKZ    | GLIS3    |
| GPR34    | DGLUCY  | GLMN     |
| GPR37    | DHCR24  | GLOD4    |
| GPR39    | DHDDS   | GLP2R    |
| GPR42    | DHFR    | GLRA2    |
| GPR63    | DHFR2   | GLRX2    |
| GPR68    | DHODH   | GLRX5    |
| GPR85    | DHRS12  | GLS      |
| GPRACR   | DHRS2   | GLT8D2   |
| GPRC5A   | DHRSX   | GLUD2    |
| GPRC5B   | DHTKD1  | GLUL     |
| GPRIN2   | DHX15   | GLYAT    |
| GPRIN3   | DHX29   | GLYCTK   |
| GPSM2    | DHX30   | GLYR1    |

|         |        |         |
|---------|--------|---------|
| GPT2    | DHX33  | GM2A    |
| GPX6    | DHX35  | GMDS    |
| GRAMD4  | DHX36  | GMEB1   |
| GRAP2   | DHX37  | GMFB    |
| GRB10   | DHX40  | GMNC    |
| GREB1   | DIABLO | GMNN    |
| GREM2   | DIAPH2 | GMPR    |
| GRHL1   | DICER1 | GMPS    |
| GRHPR   | DIDO1  | GNA13   |
| GRIA2   | DIMT1  | GNA14   |
| GRIA4   | DIO1   | GNAI2   |
| GRID1   | DIO2   | GNAI3   |
| GRIK3   | DIO3   | GNAL    |
| GRIN2A  | DIP2B  | GNAO1   |
| GRIN2B  | DIP2C  | GNAQ    |
| GRIN3A  | DIPK2A | GNAS    |
| GRK3    | DIPK2B | GNAT1   |
| GRK5    | DIRAS2 | GNB1    |
| GRM1    | DIRAS3 | GNB1L   |
| GRM2    | DIS3   | GNB3    |
| GRM4    | DIS3L2 | GNB4    |
| GRPEL1  | DISC1  | GNB5    |
| GRSF1   | DIXDC1 | GNG11   |
| GSDMD   | DKC1   | GNG12   |
| GSE1    | DKK1   | GNG2    |
| GSK3B   | DKK2   | GNG7    |
| GSPT1   | DKK3   | GNGT2   |
| GSTK1   | DLC1   | GNL1    |
| GSTM2   | DLD    | GNL3L   |
| GSTO2   | DLEU7  | GNPAT   |
| GTDC1   | DLG1   | GNPNAT1 |
| GTF2A1  | DLG2   | GOLGA1  |
| GTF2A2  | DLG3   | GOLGA3  |
| GTF2B   | DLG5   | GOLGA4  |
| GTF2E1  | DLGAP1 | GOLGA7  |
| GTF2H2C | DLGAP3 | GOLGA7B |
| GTF2H5  | DLK1   | GOLGA8B |
| GTF3C4  | DLL4   | GOLGA8H |
| GTF3C5  | DLX2   | GOLGA8K |
| GTF3C6  | DLX5   | GOLGA8M |
| GTPBP1  | DMAC1  | GOLGA8O |
| GTPBP10 | DMAC2L | GOLGA8R |
| GTPBP8  | DMC1   | GOLM1   |
| GUCY1A2 | DMD    | GOLPH3L |



|        |               |          |
|--------|---------------|----------|
| GUF1   | DMGDH         | GON4L    |
| GVQW3  | DMKN          | GON7     |
| GXYLT1 | DMP1          | GOPC     |
| GXYLT2 | DMRT2         | GORASP1  |
| GYPE   | DMRTA1        | GOSR1    |
| GYS2   | DMRTB1        | GPAM     |
| GZF1   | DMXL1         | GPATCH2  |
| H1F0   | DMXL2         | GPATCH2L |
| H1FX   | DNAAF1        | GPATCH4  |
| H2AFV  | DNAAF2        | GPATCH8  |
| H3F3B  | DNAAF5        | GPBP1    |
| HAAO   | DNAH12        | GPC6     |
| HABP2  | DNAH14        | GPCPD1   |
| HACD3  | DNAH3         | GPD1     |
| HACD4  | DNAH5         | GPD2     |
| HAP1   | DNAH8         | GPFR1    |
| HARS   | DNAJA2        | GPI      |
| HAS2   | DNAJA3        | GPKOW    |
| HAS3   | DNAJB12       | GPM6A    |
| HAUS3  | DNAJB13       | GPM6B    |
| HAUS8  | DNAJB14       | GPNMB    |
| HAVCR2 | DNAJB4        | GPR107   |
| HBEGF  | DNAJB5        | GPR12    |
| HBS1L  | DNAJB6        | GPR132   |
| HCAR1  | DNAJB7        | GPR135   |
| HCFC1  | DNAJB9        | GPR137B  |
| HCFC2  | DNAJC10       | GPR143   |
| HCN1   | DNAJC12       | GPR15    |
| HCN3   | DNAJC15       | GPR151   |
| HCN4   | DNAJC16       | GPR160   |
| HDAC11 | DNAJC18       | GPR161   |
| HDAC4  | DNAJC19       | GPR17    |
| HDAC6  | DNAJC21       | GPR173   |
| HDAC8  | DNAJC22       | GPR174   |
| HDAC9  | DNAJC24       | GPR176   |
| HDGF   | DNAJC25       | GPR180   |
| HDGFL1 | DNAJC25-GNG10 | GPR22    |
| HDHD2  | DNAJC27       | GPR25    |
| HDLBP  | DNAJC28       | GPR26    |
| HDX    | DNAJC3        | GPR27    |
| HEBP2  | DNAL1         | GPR34    |
| HECTD2 | DNALI1        | GPR37    |
| HECW1  | DNHD1         | GPR37L1  |
| HEG1   | DNM1L         | GPR42    |

|           |         |         |
|-----------|---------|---------|
| HELZ      | DNM3    | GPR63   |
| HEMK1     | DNMT3A  | GPR65   |
| HEPACAM   | DNMT3B  | GPR68   |
| HERC2     | DNTTIP2 | GPR78   |
| HERC4     | DOCK1   | GPR85   |
| HES1      | DOCK10  | GPRACR  |
| HES4      | DOCK3   | GPRC5A  |
| HES6      | DOCK4   | GPRC5B  |
| HES7      | DOCK5   | GPRIN2  |
| HEXIM1    | DOCK7   | GPRIN3  |
| HEYL      | DOCK8   | GPSM2   |
| HHAT      | DOCK9   | GPT2    |
| HHIP      | DOK3    | GPX3    |
| HHIPL1    | DOK6    | GPX6    |
| HIBCH     | DONSON  | GRAMD1B |
| HIF1A     | DOP1A   | GRAMD4  |
| HIF1AN    | DOP1B   | GRAP2   |
| HIGD1A    | DOT1L   | GRAPL   |
| HIKESHI   | DPF2    | GRB10   |
| HILPDA    | DPH3    | GREB1   |
| HIP1      | DPH5    | GREM2   |
| HIPK1     | DPH6    | GRHL1   |
| HIPK2     | DPH7    | GRHL3   |
| HIPK3     | DPM1    | GRHPR   |
| HIST1H1C  | DPP10   | GRIA2   |
| HIST1H2AG | DPP4    | GRIA4   |
| HIST1H2BD | DPP6    | GRID1   |
| HIST1H3H  | DPP8    | GRID2   |
| HIST2H4B  | DPPA3   | GRIK3   |
| HK2       | DPPA4   | GRIN2A  |
| HLA-DPB1  | DPY19L1 | GRIN2B  |
| HLTF      | DPY19L2 | GRIN3A  |
| HMBOX1    | DPY19L3 | GRK3    |
| HMG20A    | DPY19L4 | GRK5    |
| HMGA1     | DPYD    | GRM1    |
| HMGB2     | DPYSL2  | GRM2    |
| HMGB3     | DPYSL5  | GRM4    |
| HMGCLL1   | DR1     | GRPEL1  |
| HMGCR     | DRAM1   | GRSF1   |
| HMGN4     | DRAXIN  | GSDMD   |
| HMGXB4    | DRC3    | GSE1    |
| HNF1A     | DRD1    | GSG1    |
| HNF4A     | DRG1    | GSK3B   |
| HNF4G     | DRICH1  | GSPT1   |

|                 |                |                |
|-----------------|----------------|----------------|
| <i>HNMT</i>     | <i>DSC1</i>    | <i>GSR</i>     |
| <i>HNRNPA0</i>  | <i>DSC2</i>    | <i>GSTK1</i>   |
| <i>HNRNPA3</i>  | <i>DSC3</i>    | <i>GSTM2</i>   |
| <i>HNRNPD</i>   | <i>DSCC1</i>   | <i>GSTO2</i>   |
| <i>HNRNPH1</i>  | <i>DSE</i>     | <i>GTDC1</i>   |
| <i>HNRNPH3</i>  | <i>DSEL</i>    | <i>GTF2A1</i>  |
| <i>HNRNPR</i>   | <i>DSG2</i>    | <i>GTF2A2</i>  |
| <i>HNRNPU</i>   | <i>DSG3</i>    | <i>GTF2B</i>   |
| <i>HOGA1</i>    | <i>DSG4</i>    | <i>GTF2E1</i>  |
| <i>HOMER1</i>   | <i>DSN1</i>    | <i>GTF2F1</i>  |
| <i>HOMEZ</i>    | <i>DST</i>     | <i>GTF2F2</i>  |
| <i>HOOK1</i>    | <i>DSTN</i>    | <i>GTF2H2C</i> |
| <i>HOOK3</i>    | <i>DTD2</i>    | <i>GTF2H5</i>  |
| <i>HOXA13</i>   | <i>DTHD1</i>   | <i>GTF3C4</i>  |
| <i>HOXA7</i>    | <i>DTL</i>     | <i>GTF3C6</i>  |
| <i>HOXA9</i>    | <i>DTNA</i>    | <i>GTPBP1</i>  |
| <i>HOXB13</i>   | <i>DTNBP1</i>  | <i>GTPBP10</i> |
| <i>HOXB5</i>    | <i>DTWD1</i>   | <i>GTPBP8</i>  |
| <i>HOXB7</i>    | <i>DTWD2</i>   | <i>GUCY1A2</i> |
| <i>HOXB9</i>    | <i>DTX3L</i>   | <i>GUF1</i>    |
| <i>HOXC10</i>   | <i>DTX4</i>    | <i>GVQW3</i>   |
| <i>HOXC13</i>   | <i>DUOX1</i>   | <i>GXYLT1</i>  |
| <i>HOXC5</i>    | <i>DUOXA1</i>  | <i>GXYLT2</i>  |
| <i>HOXD1</i>    | <i>DUS1L</i>   | <i>GYPE</i>    |
| <i>HOXD10</i>   | <i>DUS4L</i>   | <i>GZF1</i>    |
| <i>HOXD12</i>   | <i>DUSP1</i>   | <i>H1F0</i>    |
| <i>HOXD4</i>    | <i>DUSP12</i>  | <i>H1FX</i>    |
| <i>HOXD8</i>    | <i>DUSP16</i>  | <i>H2AFV</i>   |
| <i>HOXD9</i>    | <i>DUSP18</i>  | <i>H2AFY</i>   |
| <i>HP1BP3</i>   | <i>DUSP19</i>  | <i>H3F3B</i>   |
| <i>HPCAL4</i>   | <i>DUSP2</i>   | <i>HAAO</i>    |
| <i>HPGD</i>     | <i>DUSP28</i>  | <i>HABP2</i>   |
| <i>HPSE</i>     | <i>DUSP4</i>   | <i>HACD2</i>   |
| <i>HPX</i>      | <i>DUSP5</i>   | <i>HACD3</i>   |
| <i>HRH1</i>     | <i>DUSP6</i>   | <i>HACD4</i>   |
| <i>HRK</i>      | <i>DUSP7</i>   | <i>HAP1</i>    |
| <i>HRNR</i>     | <i>DUT</i>     | <i>HAPLN1</i>  |
| <i>HS1BP3</i>   | <i>DUXA</i>    | <i>HARS</i>    |
| <i>HS2ST1</i>   | <i>DVL3</i>    | <i>HAS2</i>    |
| <i>HS3ST1</i>   | <i>DYDC1</i>   | <i>HAS3</i>    |
| <i>HS3ST3B1</i> | <i>DYNC1I1</i> | <i>HAUS3</i>   |
| <i>HS3ST5</i>   | <i>DYNC1I2</i> | <i>HAUS8</i>   |
| <i>HS6ST1</i>   | <i>DYNLL1</i>  | <i>HAVCR1</i>  |
| <i>HS6ST2</i>   | <i>DYNLL2</i>  | <i>HBEGF</i>   |

|                   |                  |                |
|-------------------|------------------|----------------|
| <i>HS6ST3</i>     | <i>DYNLT1</i>    | <i>HBS1L</i>   |
| <i>HSD17B12</i>   | <i>DYNLT3</i>    | <i>HCAR1</i>   |
| <i>HSD17B13</i>   | <i>DYRK1A</i>    | <i>HCFC2</i>   |
| <i>HSF5</i>       | <i>DYRK2</i>     | <i>HCN1</i>    |
| <i>HSP90AA1</i>   | <i>DYRK3</i>     | <i>HCN3</i>    |
| <i>HSPA13</i>     | <i>DYSF</i>      | <i>HCN4</i>    |
| <i>HSPA14</i>     | <i>DZIP1L</i>    | <i>HDAC11</i>  |
| <i>HSPB3</i>      | <i>DZIP3</i>     | <i>HDAC4</i>   |
| <i>HSPBAP1</i>    | <i>E2F1</i>      | <i>HDAC6</i>   |
| <i>HSPE1-MOB4</i> | <i>E2F2</i>      | <i>HDAC8</i>   |
| <i>HTR7</i>       | <i>E2F3</i>      | <i>HDGF</i>    |
| <i>HTT</i>        | <i>E2F5</i>      | <i>HDGFL1</i>  |
| <i>HUNK</i>       | <i>E2F7</i>      | <i>HDHD2</i>   |
| <i>HUS1</i>       | <i>EBF2</i>      | <i>HDLBP</i>   |
| <i>HYPK</i>       | <i>EBAG9</i>     | <i>HDX</i>     |
| <i>IARS</i>       | <i>EBF1</i>      | <i>HEATR1</i>  |
| <i>IBA57</i>      | <i>EBF2</i>      | <i>HEBP2</i>   |
| <i>IBSP</i>       | <i>EBF3</i>      | <i>HECTD1</i>  |
| <i>ICAM1</i>      | <i>EBF4</i>      | <i>HECTD2</i>  |
| <i>ICE2</i>       | <i>EBNA1BP2</i>  | <i>HECW1</i>   |
| <i>ICK</i>        | <i>EBPL</i>      | <i>HECW2</i>   |
| <i>ICMT</i>       | <i>ECD</i>       | <i>HEG1</i>    |
| <i>IER3IP1</i>    | <i>ECE1</i>      | <i>HEMK1</i>   |
| <i>IFI44L</i>     | <i>ECHDC2</i>    | <i>HEPACAM</i> |
| <i>IFIT1</i>      | <i>ECHDC3</i>    | <i>HERC2</i>   |
| <i>IFIT1B</i>     | <i>ECI2</i>      | <i>HERC4</i>   |
| <i>IFIT2</i>      | <i>ECM2</i>      | <i>HES4</i>    |
| <i>IFIT5</i>      | <i>ECPAS</i>     | <i>HES6</i>    |
| <i>IFNAR2</i>     | <i>ECRG4</i>     | <i>HES7</i>    |
| <i>IFNE</i>       | <i>ECT2</i>      | <i>HEXIM1</i>  |
| <i>IFNGR1</i>     | <i>EDA</i>       | <i>HEYL</i>    |
| <i>IFNLR1</i>     | <i>EDA2R</i>     | <i>HGFAC</i>   |
| <i>IFRD1</i>      | <i>EDC3</i>      | <i>HGH1</i>    |
| <i>IFT20</i>      | <i>EDEM1</i>     | <i>HHAT</i>    |
| <i>IFT22</i>      | <i>EDEM3</i>     | <i>HHIP</i>    |
| <i>IFT81</i>      | <i>EDF1</i>      | <i>HHIPL1</i>  |
| <i>IGDCC3</i>     | <i>EDIL3</i>     | <i>HIBCH</i>   |
| <i>IGDCC4</i>     | <i>EDN1</i>      | <i>HIC2</i>    |
| <i>IGF1</i>       | <i>EDN3</i>      | <i>HIF1A</i>   |
| <i>IGF2BP1</i>    | <i>EDNRA</i>     | <i>HIF1AN</i>  |
| <i>IGF2BP2</i>    | <i>EDNRB</i>     | <i>HIGD1A</i>  |
| <i>IGFBP4</i>     | <i>EDRF1</i>     | <i>HIKESHI</i> |
| <i>IGFBPL1</i>    | <i>EEA1</i>      | <i>HINT3</i>   |
| <i>IGHMBP2</i>    | <i>EEF1AKMT2</i> | <i>HIP1</i>    |

|          |         |           |
|----------|---------|-----------|
| IGLON5   | EEF1D   | HIPK1     |
| IGSF11   | EEF1E1  | HIPK2     |
| IGSF3    | EEF2K   | HIPK3     |
| IKZF1    | EEF2KMT | HIST1H1C  |
| IKZF4    | EEPD1   | HIST1H2AC |
| IKZF5    | EFCAB1  | HIST1H2AE |
| IL12RB1  | EFCAB10 | HIST1H2AG |
| IL12RB2  | EFCAB11 | HIST1H2BD |
| IL13     | EFCAB12 | HIST1H3D  |
| IL13RA1  | EFCAB14 | HIST1H3H  |
| IL17D    | EFCAB2  | HIST2H2AC |
| IL17RB   | EFCAB7  | HIST2H3D  |
| IL17REL  | EFEMP1  | HIVEP1    |
| IL18BP   | EFHC1   | HK2       |
| IL1RAP   | EFHC2   | HLA-DOA   |
| IL1RAPL1 | EFNA2   | HLA-DPB1  |
| IL1RL1   | EFNA4   | HLTF      |
| IL2RG    | EFNA5   | HLX       |
| IL36RN   | EFR3A   | HMBOX1    |
| IL5RA    | EFR3B   | HMG20A    |
| IL6R     | EGF     | HMGB2     |
| ILDR2    | EGFR    | HMGB3     |
| ILK      | EGLN1   | HMGCLL1   |
| IMMP2L   | EGLN3   | HMGCR     |
| IMPA2    | EGR1    | HMGCS2    |
| IMPACT   | EGR2    | HMGN4     |
| IMPAD1   | EGR3    | HMGXB4    |
| IMPG2    | EHD1    | HMOX1     |
| INA      | EHD3    | HNF1A     |
| INAVA    | EHF     | HNF4A     |
| INCENP   | EHHADH  | HNF4G     |
| ING2     | EHMT1   | HNMT      |
| ING3     | EI24    | HNRNPA0   |
| INIP     | EID2    | HNRNPA3   |
| INKA2    | EID2B   | HNRNPD    |
| INMT     | EIF1AX  | HNRNPH3   |
| INO80D   | EIF1AY  | HNRNPR    |
| INPP4A   | EIF2A   | HNRNPU    |
| INPP4B   | EIF2AK1 | HNRNPUL2  |
| INPP5A   | EIF2AK2 | HOGA1     |
| INSC     | EIF2B1  | HOMER1    |
| INSIG1   | EIF2B2  | HOMER1    |
| INSIG2   | EIF2B3  | HOMER1    |
| INSM1    | EIF2S1  | HOOK1     |
|          |         | HOOK3     |

|                     |                 |                 |
|---------------------|-----------------|-----------------|
| <i>INSYN2B</i>      | <i>EIF2S3</i>   | <i>HOXA10</i>   |
| <i>INTS2</i>        | <i>EIF2S3B</i>  | <i>HOXA13</i>   |
| <i>INTU</i>         | <i>EIF3A</i>    | <i>HOXA7</i>    |
| <i>IP6K1</i>        | <i>EIF3H</i>    | <i>HOXA9</i>    |
| <i>IPMK</i>         | <i>EIF3J</i>    | <i>HOXB13</i>   |
| <i>IPO11-LRRC70</i> | <i>EIF3M</i>    | <i>HOXB2</i>    |
| <i>IPO13</i>        | <i>EIF4A1</i>   | <i>HOXB5</i>    |
| <i>IPO5</i>         | <i>EIF4A3</i>   | <i>HOXB7</i>    |
| <i>IPO7</i>         | <i>EIF4E</i>    | <i>HOXB9</i>    |
| <i>IPO9</i>         | <i>EIF4E2</i>   | <i>HOXC10</i>   |
| <i>IPP</i>          | <i>EIF4E3</i>   | <i>HOXC5</i>    |
| <i>IQCC</i>         | <i>EIF4EBP1</i> | <i>HOXC8</i>    |
| <i>IQCH</i>         | <i>EIF4EBP2</i> | <i>HOXD1</i>    |
| <i>IQCJ</i>         | <i>EIF5</i>     | <i>HOXD10</i>   |
| <i>IQGAP1</i>       | <i>EIF5A2</i>   | <i>HOXD12</i>   |
| <i>IQGAP2</i>       | <i>EIF5AL1</i>  | <i>HOXD13</i>   |
| <i>IQSEC3</i>       | <i>EIF5B</i>    | <i>HOXD4</i>    |
| <i>IRAK1</i>        | <i>ELAC1</i>    | <i>HOXD8</i>    |
| <i>IRF2</i>         | <i>ELAC2</i>    | <i>HP1BP3</i>   |
| <i>IRF2BP2</i>      | <i>ELAVL1</i>   | <i>HPCAL4</i>   |
| <i>IRF4</i>         | <i>ELAVL4</i>   | <i>HPGD</i>     |
| <i>IRF6</i>         | <i>ELF2</i>     | <i>HPS5</i>     |
| <i>IRGQ</i>         | <i>ELF4</i>     | <i>HPSE</i>     |
| <i>IRS1</i>         | <i>ELK1</i>     | <i>HPSE2</i>    |
| <i>IRS4</i>         | <i>ELK3</i>     | <i>HPX</i>      |
| <i>IRX5</i>         | <i>ELK4</i>     | <i>HRH1</i>     |
| <i>ISCA1</i>        | <i>ELL</i>      | <i>HRK</i>      |
| <i>ISG20L2</i>      | <i>ELL2</i>     | <i>HRNR</i>     |
| <i>ISL1</i>         | <i>ELMO2</i>    | <i>HS1BP3</i>   |
| <i>ISM2</i>         | <i>ELMOD1</i>   | <i>HS2ST1</i>   |
| <i>IST1</i>         | <i>ELMOD2</i>   | <i>HS3ST1</i>   |
| <i>ISY1</i>         | <i>ELOC</i>     | <i>HS3ST3B1</i> |
| <i>ISY1-RAB43</i>   | <i>ELOVL2</i>   | <i>HS3ST5</i>   |
| <i>ITGA1</i>        | <i>ELOVL3</i>   | <i>HS6ST1</i>   |
| <i>ITGA10</i>       | <i>ELOVL4</i>   | <i>HS6ST2</i>   |
| <i>ITGA11</i>       | <i>ELOVL5</i>   | <i>HS6ST3</i>   |
| <i>ITGA2</i>        | <i>ELOVL6</i>   | <i>HSD17B12</i> |
| <i>ITGA3</i>        | <i>ELOVL7</i>   | <i>HSD17B13</i> |
| <i>ITGA9</i>        | <i>ELP1</i>     | <i>HSF5</i>     |
| <i>ITGB1BP1</i>     | <i>ELP2</i>     | <i>HSP90AA1</i> |
| <i>ITGB3</i>        | <i>ELP3</i>     | <i>HSPA13</i>   |
| <i>ITGB3BP</i>      | <i>ELP4</i>     | <i>HSPA14</i>   |
| <i>ITGB8</i>        | <i>ELP6</i>     | <i>HSPA1B</i>   |
| <i>ITPA</i>         | <i>EMB</i>      | <i>HSPB3</i>    |

|                 |                 |                   |
|-----------------|-----------------|-------------------|
| <i>ITPKB</i>    | <i>EMC1</i>     | <i>HSPE1-MOB4</i> |
| <i>ITPR1</i>    | <i>EMC2</i>     | <i>HSPH1</i>      |
| <i>ITPR2</i>    | <i>EMC7</i>     | <i>HTR5A</i>      |
| <i>ITPRIPL2</i> | <i>EMCN</i>     | <i>HTR5A-AS1</i>  |
| <i>ITSN1</i>    | <i>EML1</i>     | <i>HTR6</i>       |
| <i>IWS1</i>     | <i>EML4</i>     | <i>HTR7</i>       |
| <i>IYD</i>      | <i>EML5</i>     | <i>HTT</i>        |
| <i>JADE2</i>    | <i>EML6</i>     | <i>HUNK</i>       |
| <i>JAK3</i>     | <i>EMP1</i>     | <i>HUS1</i>       |
| <i>JAKMIP2</i>  | <i>EMP2</i>     | <i>IBA57</i>      |
| <i>JAKMIP3</i>  | <i>EN1</i>      | <i>IBSP</i>       |
| <i>JAM2</i>     | <i>EN2</i>      | <i>ICA1L</i>      |
| <i>JAM3</i>     | <i>ENAH</i>     | <i>ICAM1</i>      |
| <i>JCAD</i>     | <i>ENAM</i>     | <i>ICE2</i>       |
| <i>JHY</i>      | <i>ENC1</i>     | <i>ICK</i>        |
| <i>JMY</i>      | <i>ENDOD1</i>   | <i>ICMT</i>       |
| <i>JPH2</i>     | <i>ENDOV</i>    | <i>IDE</i>        |
| <i>JPH3</i>     | <i>ENGASE</i>   | <i>IDS</i>        |
| <i>JPT2</i>     | <i>ENKUR</i>    | <i>IER3IP1</i>    |
| <i>JTB</i>      | <i>ENOPH1</i>   | <i>IFI44L</i>     |
| <i>KANSL1</i>   | <i>ENOSF1</i>   | <i>IFIT1</i>      |
| <i>KARS</i>     | <i>ENOX2</i>    | <i>IFIT1B</i>     |
| <i>KAT14</i>    | <i>ENPEP</i>    | <i>IFIT2</i>      |
| <i>KAT6B</i>    | <i>ENPP4</i>    | <i>IFIT5</i>      |
| <i>KATNBL1</i>  | <i>ENPP5</i>    | <i>IFNAR2</i>     |
| <i>KAZALD1</i>  | <i>ENPP6</i>    | <i>IFNE</i>       |
| <i>KAZN</i>     | <i>ENSA</i>     | <i>IFNGR1</i>     |
| <i>KBTD11</i>   | <i>ENTHD1</i>   | <i>IFNLRL1</i>    |
| <i>KBTD12</i>   | <i>ENTPD1</i>   | <i>IFRD1</i>      |
| <i>KBTD13</i>   | <i>ENTPD3</i>   | <i>IFT20</i>      |
| <i>KBTD3</i>    | <i>ENTPD4</i>   | <i>IFT22</i>      |
| <i>KBTD6</i>    | <i>ENTPD5</i>   | <i>IFT74</i>      |
| <i>KBTD7</i>    | <i>ENTPD7</i>   | <i>IGDCC3</i>     |
| <i>KCMF1</i>    | <i>ENTR1</i>    | <i>IGDCC4</i>     |
| <i>KCNA1</i>    | <i>ENY2</i>     | <i>IGF1</i>       |
| <i>KCNA5</i>    | <i>EOGT</i>     | <i>IGF2BP1</i>    |
| <i>KCNA6</i>    | <i>EOMES</i>    | <i>IGF2BP2</i>    |
| <i>KCNA7</i>    | <i>EPAS1</i>    | <i>IGFBP4</i>     |
| <i>KCNB1</i>    | <i>EPB41L1</i>  | <i>IGFBP5</i>     |
| <i>KCNC1</i>    | <i>EPB41L2</i>  | <i>IGFBPL1</i>    |
| <i>KCNC2</i>    | <i>EPB41L3</i>  | <i>IGHMBP2</i>    |
| <i>KCND3</i>    | <i>EPB41L4B</i> | <i>IGLON5</i>     |
| <i>KCNE1</i>    | <i>EPB41L5</i>  | <i>IGSF11</i>     |
| <i>KCNE3</i>    | <i>EPC2</i>     | <i>IGSF3</i>      |

|          |          |          |
|----------|----------|----------|
| KCNF1    | EPGN     | IKBIP    |
| KCNG3    | EPHA10   | IKZF1    |
| KCNG4    | EPHA3    | IKZF4    |
| KCNH1    | EPHA4    | IKZF5    |
| KCNH8    | EPHA5    | IL12RB1  |
| KCNJ1    | EPHA6    | IL12RB2  |
| KCNJ11   | EPHA7    | IL13     |
| KCNJ5    | EPHX2    | IL13RA1  |
| KCNJ6    | EPM2A    | IL17D    |
| KCNK1    | EPM2AIP1 | IL17RA   |
| KCNK10   | EPN2     | IL17RB   |
| KCNK12   | EPN3     | IL17REL  |
| KCNK2    | EPPIN    | IL18BP   |
| KCNK5    | EPSTI1   | IL1RAP   |
| KCNMA1   | EPYC     | IL1RAPL1 |
| KCNMB3   | ERAP1    | IL1RL1   |
| KCNMB4   | ERAP2    | IL27RA   |
| KCNN3    | ERBB3    | IL2RG    |
| KCNQ3    | ERBB4    | IL36G    |
| KCNS1    | ERBIN    | IL36RN   |
| KCNS2    | ERC1     | IL5RA    |
| KCNT2    | ERC2     | IL6R     |
| KCNV2    | ERCC1    | IL6ST    |
| KCTD10   | ERCC4    | IL7R     |
| KCTD12   | ERCC6    | ILDR2    |
| KCTD16   | ERCC6L   | IMMP2L   |
| KCTD2    | ERCC6L2  | IMPA2    |
| KCTD20   | EREG     | IMPACT   |
| KCTD21   | ERFE     | IMPAD1   |
| KCTD6    | ERG28    | IMPDH1   |
| KCTD7    | ERGIC1   | IMPG2    |
| KDELR1   | ERI1     | INA      |
| KDELR2   | ERICH3   | INAVA    |
| KDM2A    | ERICH4   | INCENP   |
| KDM4E    | ERLEC1   | INF2     |
| KDM5A    | ERLIN2   | ING3     |
| KDM5B    | ERMAP    | INIP     |
| KDM6A    | ERMN     | INKA2    |
| KDM7A    | ERMP1    | INMT     |
| KDR      | ERN1     | INO80D   |
| KERA     | ERO1A    | INPP4A   |
| KHDRBS2  | ERO1B    | INPP4B   |
| KIAA0040 | ERP27    | INPP5A   |
| KIAA0232 | ERP29    | INSC     |



|           |            |              |
|-----------|------------|--------------|
| KIAA0319  | ERP44      | INSIG1       |
| KIAA0408  | ERVMER34-1 | INSIG2       |
| KIAA0513  | ERVV-1     | INSM1        |
| KIAA0586  | ERVW-1     | INSM2        |
| KIAA0825  | ESCO2      | INSR         |
| KIAA0895  | ESF1       | INSYN2A      |
| KIAA1143  | ESM1       | INSYN2B      |
| KIAA1147  | ESR1       | INTS2        |
| KIAA1210  | ESRP1      | INTS6        |
| KIAA1211  | ESRRG      | INTU         |
| KIAA1324  | ESYT3      | IP6K1        |
| KIAA1522  | ETFA       | IPMK         |
| KIAA1549  | ETFBKMT    | IPO11-LRRC70 |
| KIAA1549L | ETFDH      | IPO13        |
| KIAA1586  | ETNK1      | IPO5         |
| KIAA1614  | ETNPPL     | IPO7         |
| KIAA1755  | ETV1       | IPO9         |
| KIAA1841  | ETV3       | IPPK         |
| KIF13B    | ETV5       | IQCC         |
| KIF14     | ETV6       | IQCE         |
| KIF15     | ETV7       | IQCH         |
| KIF16B    | EVA1A      | IQCJ         |
| KIF18B    | EVI2B      | IQGAP1       |
| KIF1B     | EVI5       | IQGAP2       |
| KIF1BP    | EVX2       | IQSEC3       |
| KIF1C     | EXD2       | IRAK1        |
| KIF20A    | EXOC2      | IRF1         |
| KIF21B    | EXOC3      | IRF2         |
| KIF27     | EXOC3-AS1  | IRF2BP2      |
| KIF3B     | EXOC3L4    | IRF4         |
| KIF4A     | EXOC4      | IRF6         |
| KIF5A     | EXOC6      | IRGQ         |
| KIF5C     | EXOC6B     | IRS1         |
| KIF6      | EXOSC1     | IRS4         |
| KIN       | EXOSC3     | IRX5         |
| KIR3DL1   | EXOSC6     | ISCA1        |
| KIR3DL2   | EXPH5      | ISCA2        |
| KIT       | EXT1       | ISCU         |
| KITLG     | EXT2       | ISG20        |
| KLC1      | EXTL2      | ISG20L2      |
| KLF10     | EXTL3      | ISL1         |
| KLF12     | EYA1       | ISM2         |
| KLF13     | EYA3       | IST1         |
| KLF3      | EYA4       | ISY1         |

|                |                 |                   |
|----------------|-----------------|-------------------|
| <i>KLF7</i>    | <i>EZH1</i>     | <i>ISY1-RAB43</i> |
| <i>KLF8</i>    | <i>F11</i>      | <i>ITGA1</i>      |
| <i>KLF9</i>    | <i>F11R</i>     | <i>ITGA10</i>     |
| <i>KLHDC10</i> | <i>F13A1</i>    | <i>ITGA11</i>     |
| <i>KLHDC3</i>  | <i>F13B</i>     | <i>ITGA2</i>      |
| <i>KLHDC7A</i> | <i>F2R</i>      | <i>ITGA3</i>      |
| <i>KLHL1</i>   | <i>F2RL1</i>    | <i>ITGA4</i>      |
| <i>KLHL11</i>  | <i>F2RL2</i>    | <i>ITGA9</i>      |
| <i>KLHL14</i>  | <i>F3</i>       | <i>ITGB3</i>      |
| <i>KLHL18</i>  | <i>F5</i>       | <i>ITGB3BP</i>    |
| <i>KLHL2</i>   | <i>F7</i>       | <i>ITGB8</i>      |
| <i>KLHL21</i>  | <i>F8</i>       | <i>ITIH5</i>      |
| <i>KLHL23</i>  | <i>F8A2</i>     | <i>ITPA</i>       |
| <i>KLHL24</i>  | <i>F9</i>       | <i>ITPR1</i>      |
| <i>KLHL28</i>  | <i>FAAP20</i>   | <i>ITPR2</i>      |
| <i>KLHL3</i>   | <i>FABP1</i>    | <i>ITPRIPL2</i>   |
| <i>KLHL31</i>  | <i>FABP2</i>    | <i>ITSN1</i>      |
| <i>KLHL36</i>  | <i>FABP4</i>    | <i>IWS1</i>       |
| <i>KLHL38</i>  | <i>FABP5</i>    | <i>IYD</i>        |
| <i>KLHL4</i>   | <i>FADS1</i>    | <i>JAK3</i>       |
| <i>KLHL42</i>  | <i>FAF1</i>     | <i>JAKMIP2</i>    |
| <i>KLHL5</i>   | <i>FAF2</i>     | <i>JAKMIP3</i>    |
| <i>KLHL6</i>   | <i>FAH</i>      | <i>JAM2</i>       |
| <i>KLHL7</i>   | <i>FAHD1</i>    | <i>JAM3</i>       |
| <i>KLHL8</i>   | <i>FAIM2</i>    | <i>JCAD</i>       |
| <i>KLK2</i>    | <i>FAM102A</i>  | <i>JMJD4</i>      |
| <i>KLRB1</i>   | <i>FAM102B</i>  | <i>JMY</i>        |
| <i>KLRC3</i>   | <i>FAM104A</i>  | <i>JPH2</i>       |
| <i>KLRC4</i>   | <i>FAM104B</i>  | <i>JPH3</i>       |
| <i>KMT2A</i>   | <i>FAM107A</i>  | <i>KALRN</i>      |
| <i>KMT2C</i>   | <i>FAM107B</i>  | <i>KANSL1</i>     |
| <i>KMT2D</i>   | <i>FAM110B</i>  | <i>KANSL3</i>     |
| <i>KMT5B</i>   | <i>FAM110C</i>  | <i>KARS</i>       |
| <i>KNSTRN</i>  | <i>FAM110D</i>  | <i>KAT14</i>      |
| <i>KPNA1</i>   | <i>FAM111A</i>  | <i>KAT6B</i>      |
| <i>KPNA2</i>   | <i>FAM111B</i>  | <i>KATNBL1</i>    |
| <i>KPNA3</i>   | <i>FAM114A1</i> | <i>KAZALD1</i>    |
| <i>KPNA4</i>   | <i>FAM114A2</i> | <i>KAZN</i>       |
| <i>KPNA5</i>   | <i>FAM117B</i>  | <i>KBTBD11</i>    |
| <i>KPNA6</i>   | <i>FAM118A</i>  | <i>KBTBD12</i>    |
| <i>KPNB1</i>   | <i>FAM120A</i>  | <i>KBTBD13</i>    |
| <i>KRIT1</i>   | <i>FAM120B</i>  | <i>KBTBD2</i>     |
| <i>KRT222</i>  | <i>FAM120C</i>  | <i>KBTBD6</i>     |
| <i>KRT23</i>   | <i>FAM122B</i>  | <i>KBTBD7</i>     |

|          |          |        |
|----------|----------|--------|
| KRT31    | FAM122C  | KCMF1  |
| KRT35    | FAM124A  | KCNA1  |
| KRT77    | FAM124B  | KCNA5  |
| KRT78    | FAM126A  | KCNA6  |
| KRT81    | FAM126B  | KCNA7  |
| KRT86    | FAM131B  | KCNB1  |
| KRTAP4-4 | FAM133B  | KCNC1  |
| KRTAP4-5 | FAM135A  | KCND3  |
| KRTAP4-7 | FAM135B  | KCNE1  |
| KRTAP4-9 | FAM13A   | KCNE2  |
| KRTAP5-8 | FAM13B   | KCNE3  |
| KRTAP8-1 | FAM149B1 | KCNG3  |
| KRTCAP2  | FAM151B  | KCNG4  |
| KSR1     | FAM153A  | KCNH1  |
| KSR2     | FAM155A  | KCNH8  |
| KYNU     | FAM155B  | KCNIP1 |
| L2HGDH   | FAM160A2 | KCNJ1  |
| L3MBTL1  | FAM160B1 | KCNJ11 |
| LACC1    | FAM160B2 | KCNJ15 |
| LAMA4    | FAM161A  | KCNJ5  |
| LAMB3    | FAM162A  | KCNJ6  |
| LAMP3    | FAM162B  | KCNK1  |
| LAMTOR3  | FAM163A  | KCNK10 |
| LANCL3   | FAM167A  | KCNK12 |
| LARGE1   | FAM168A  | KCNK2  |
| LARP1    | FAM168B  | KCNK5  |
| LARP4    | FAM169A  | KCNMA1 |
| LATS1    | FAM170B  | KCNMB2 |
| LAYN     | FAM171B  | KCNMB3 |
| LBH      | FAM172A  | KCNMB4 |
| LBHD1    | FAM174B  | KCNN3  |
| LBP      | FAM177A1 | KCNQ3  |
| LBR      | FAM180A  | KCNS1  |
| LCA5     | FAM184B  | KCNS2  |
| LCK      | FAM186A  | KCNT2  |
| LCLAT1   | FAM189B  | KCNV2  |
| LCOR     | FAM199X  | KCTD10 |
| LDB3     | FAM200A  | KCTD12 |
| LDHA     | FAM204A  | KCTD16 |
| LDHAL6B  | FAM20A   | KCTD2  |
| LDHC     | FAM20B   | KCTD20 |
| LDLR     | FAM210B  | KCTD21 |
| LDLRAD2  | FAM216B  | KCTD6  |
| LDLRAD4  | FAM217A  | KCTD7  |

|                  |                |                  |
|------------------|----------------|------------------|
| <i>LDLRAP1</i>   | <i>FAM217B</i> | <i>KDELR1</i>    |
| <i>LEP</i>       | <i>FAM221B</i> | <i>KDELR2</i>    |
| <i>LEPROT</i>    | <i>FAM227A</i> | <i>KDM2A</i>     |
| <i>LETM1</i>     | <i>FAM229B</i> | <i>KDM4E</i>     |
| <i>LETMD1</i>    | <i>FAM241A</i> | <i>KDM5A</i>     |
| <i>LFNG</i>      | <i>FAM3C</i>   | <i>KDM5B</i>     |
| <i>LGALS3BP</i>  | <i>FAM47E</i>  | <i>KDM6A</i>     |
| <i>LGALSL</i>    | <i>FAM49A</i>  | <i>KDM7A</i>     |
| <i>LGI2</i>      | <i>FAM49B</i>  | <i>KDR</i>       |
| <i>LGI3</i>      | <i>FAM53A</i>  | <i>KERA</i>      |
| <i>LGMN</i>      | <i>FAM53C</i>  | <i>KHDRBS2</i>   |
| <i>LHCGR</i>     | <i>FAM72A</i>  | <i>KHSRP</i>     |
| <i>LHFPL2</i>    | <i>FAM72B</i>  | <i>KIAA0040</i>  |
| <i>LHFPL4</i>    | <i>FAM72C</i>  | <i>KIAA0087</i>  |
| <i>LHPP</i>      | <i>FAM72D</i>  | <i>KIAA0232</i>  |
| <i>LHX4</i>      | <i>FAM76A</i>  | <i>KIAA0319</i>  |
| <i>LHX8</i>      | <i>FAM76B</i>  | <i>KIAA0408</i>  |
| <i>LHX9</i>      | <i>FAM81A</i>  | <i>KIAA0513</i>  |
| <i>LIFR</i>      | <i>FAM83A</i>  | <i>KIAA0586</i>  |
| <i>LILRB4</i>    | <i>FAM83B</i>  | <i>KIAA0825</i>  |
| <i>LIMCH1</i>    | <i>FAM83E</i>  | <i>KIAA0895</i>  |
| <i>LIMS1</i>     | <i>FAM83F</i>  | <i>KIAA1143</i>  |
| <i>LIMS2</i>     | <i>FAM86B1</i> | <i>KIAA1147</i>  |
| <i>LIN28A</i>    | <i>FAM86C1</i> | <i>KIAA1210</i>  |
| <i>LIN54</i>     | <i>FAM89A</i>  | <i>KIAA1211</i>  |
| <i>LINC00346</i> | <i>FAM8A1</i>  | <i>KIAA1324</i>  |
| <i>LINC01546</i> | <i>FAM91A1</i> | <i>KIAA1324L</i> |
| <i>LINC01559</i> | <i>FAM92A</i>  | <i>KIAA1522</i>  |
| <i>LINS1</i>     | <i>FAM98A</i>  | <i>KIAA1549</i>  |
| <i>LIPC</i>      | <i>FAM98B</i>  | <i>KIAA1549L</i> |
| <i>LIPG</i>      | <i>FAM9A</i>   | <i>KIAA1586</i>  |
| <i>LIPT2</i>     | <i>FAM9C</i>   | <i>KIAA1755</i>  |
| <i>LITAF</i>     | <i>FAN1</i>    | <i>KIAA1841</i>  |
| <i>LIX1</i>      | <i>FANCA</i>   | <i>KIAA1958</i>  |
| <i>LLPH</i>      | <i>FANCB</i>   | <i>KIF13B</i>    |
| <i>LMAN2L</i>    | <i>FANCC</i>   | <i>KIF14</i>     |
| <i>LMBR1</i>     | <i>FANCG</i>   | <i>KIF15</i>     |
| <i>LMBRD2</i>    | <i>FANCI</i>   | <i>KIF16B</i>    |
| <i>LMO3</i>      | <i>FANCM</i>   | <i>KIF18B</i>    |
| <i>LMO4</i>      | <i>FAR1</i>    | <i>KIF1A</i>     |
| <i>LMOD1</i>     | <i>FAR2</i>    | <i>KIF1B</i>     |
| <i>LMTK2</i>     | <i>FARP1</i>   | <i>KIF1C</i>     |
| <i>LMX1A</i>     | <i>FARSB</i>   | <i>KIF20A</i>    |
| <i>LMX1B</i>     | <i>FAS</i>     | <i>KIF21A</i>    |

|              |         |         |
|--------------|---------|---------|
| LNP1         | FASLG   | KIF21B  |
| LNPEP        | FASTKD1 | KIF24   |
| LNPk         | FASTKD2 | KIF27   |
| LNx1         | FAT1    | KIF3B   |
| LNx2         | FAT4    | KIF5A   |
| LOC100129215 | FAXC    | KIF5C   |
| LOC100996419 | FBH1    | KIF6    |
| LOC105371730 | FBLIM1  | KIFC2   |
| LOC107983990 | FBLN2   | KIN     |
| LOC388242    | FBLN7   | KIR3DL1 |
| LOC400464    | FBN1    | KIR3DL2 |
| LOC401589    | FBN2    | KIT     |
| LOC613038    | FBXL14  | KLC1    |
| LOC644656    | FBXL18  | KLF10   |
| LOC730098    | FBXL20  | KLF11   |
| LOC730338    | FBXL22  | KLF12   |
| LONP2        | FBXL3   | KLF13   |
| LONRF2       | FBXL4   | KLF3    |
| LONRF3       | FBXL5   | KLF7    |
| LOXL3        | FBXL6   | KLF8    |
| LPAR1        | FBXL7   | KLF9    |
| LPAR3        | FBXO11  | KLHDC10 |
| LPAR5        | FBXO16  | KLHDC3  |
| LPCAT1       | FBXO17  | KLHDC7A |
| LPCAT2       | FBXO22  | KLHDC8A |
| LPGAT1       | FBXO28  | KLHL1   |
| LPP          | FBXO3   | KLHL11  |
| LRATD1       | FBXO30  | KLHL14  |
| LRATD2       | FBXO31  | KLHL18  |
| LRCH2        | FBXO32  | KLHL2   |
| LRFN2        | FBXO33  | KLHL21  |
| LRIF1        | FBXO34  | KLHL23  |
| LRIG3        | FBXO40  | KLHL24  |
| LRP10        | FBXO42  | KLHL28  |
| LRP6         | FBXO43  | KLHL3   |
| LRRC14       | FBXO44  | KLHL30  |
| LRRC14B      | FBXO45  | KLHL31  |
| LRRC15       | FBXO47  | KLHL36  |
| LRRC19       | FBXO48  | KLHL38  |
| LRRC2        | FBXO5   | KLHL4   |
| LRRC20       | FBXO9   | KLHL5   |
| LRRC28       | FBXW11  | KLHL6   |
| LRRC3        | FBXW2   | KLHL7   |
| LRRC34       | FBXW7   | KLHL8   |

|         |         |          |
|---------|---------|----------|
| LRRC58  | FBXW8   | KLK2     |
| LRRC7   | FCAR    | KLK3     |
| LRRC75A | FCER1A  | KLRB1    |
| LRRC8C  | FCF1    | KLRC3    |
| LRRCC1  | FCGR1A  | KLRC4    |
| LRRN1   | FCGR1B  | KLRG2    |
| LRRTM2  | FCGR2B  | KMT2A    |
| LRSAM1  | FCGR3A  | KMT2C    |
| LSAMP   | FCGR3B  | KMT5B    |
| LSG1    | FCHO2   | KNSTRN   |
| LSM10   | FCN2    | KPNA1    |
| LSM14A  | FCRL1   | KPNA2    |
| LSM6    | FCRL3   | KPNA3    |
| LSM8    | FCRL4   | KPNA4    |
| LTBP2   | FCRL5   | KPNA5    |
| LTF     | FCRL6   | KPNA6    |
| LTO1    | FCRLB   | KREMEN1  |
| LUC7L   | FDX1    | KRIT1    |
| LUC7L2  | FDXACB1 | KRT222   |
| LUC7L3  | FECH    | KRT23    |
| LUZP2   | FEM1A   | KRT31    |
| LY6E    | FEM1B   | KRT35    |
| LY75    | FEM1C   | KRT77    |
| LY9     | FER     | KRT78    |
| LYN     | FERMT1  | KRT81    |
| LYPD6   | FERMT2  | KRT86    |
| LYPLA1  | FERMT3  | KRTAP4-4 |
| LYRM2   | FEZ1    | KRTAP4-5 |
| LYRM4   | FGA     | KRTAP5-8 |
| LYRM7   | FGB     | KRTAP8-1 |
| LYRM9   | FGD1    | KRTCAP2  |
| LYSMD1  | FGD2    | KSR1     |
| LYSMD2  | FGD4    | KSR2     |
| LZTFL1  | FGD6    | KYNU     |
| LZTS1   | FGF1    | L1TD1    |
| M1AP    | FGF10   | L2HGDH   |
| M6PR    | FGF12   | L3MBTL1  |
| MAB21L1 | FGF13   | LACC1    |
| MACF1   | FGF14   | LAD1     |
| MAD2L1  | FGF16   | LAIR1    |
| MAGEB10 | FGF18   | LAMA4    |
| MAGEL2  | FGF19   | LAMB3    |
| MAGI1   | FGF2    | LAMC1    |
| MAGI2   | FGF5    | LAMP3    |

|           |          |         |
|-----------|----------|---------|
| MAGOHB    | FGF9     | LAMTOR3 |
| MAK16     | FGFBP1   | LAMTOR5 |
| MALSU1    | FGFBP2   | LANCL3  |
| MAML1     | FGFBP3   | LARGE1  |
| MAML3     | FGFR1OP  | LARP1   |
| MAMLD1    | FGFR1OP2 | LARP4   |
| MAN1A1    | FGG      | LARS2   |
| MAN1C1    | FGL2     | LATS1   |
| MAN2A1    | FHDC1    | LATS2   |
| MAN2B2    | FHL1     | LAYN    |
| MANEAL    | FHL2     | LBH     |
| MANSC1    | FHL3     | LBHD1   |
| MAP1B     | FHL5     | LBP     |
| MAP1LC3B  | FIBIN    | LBR     |
| MAP2K4    | FIG4     | LCA5    |
| MAP2K6    | FIGN     | LCK     |
| MAP3K10   | FIGNL1   | LCLAT1  |
| MAP3K13   | FILIP1   | LCOR    |
| MAP3K20   | FILIP1L  | LDB3    |
| MAP3K3    | FIP1L1   | LDHA    |
| MAP3K4    | FITM2    | LDHAL6B |
| MAP3K7    | FJX1     | LDHB    |
| MAP3K8    | FKBP14   | LDLR    |
| MAP3K9    | FKBP1B   | LDLRAD1 |
| MAP4K2    | FKBP4    | LDLRAD2 |
| MAP4K4    | FKBP5    | LDLRAD4 |
| MAP4K5    | FKBP7    | LDLRAP1 |
| MAP6      | FKBP9    | LEPROT  |
| MAP7      | FKRP     | LETM1   |
| MAP7D2    | FKTN     | LETMD1  |
| MAP9      | FLCN     | LFNG    |
| MAPK1     | FLG      | LGALSL  |
| MAPK10    | FLG2     | LGI2    |
| MAPK13    | FLJ22447 | LGI3    |
| MAPK14    | FLRT1    | LGMN    |
| MAPK11P1L | FLRT2    | LGR4    |
| MAPK8     | FLRT3    | LGSN    |
| MAPK9     | FLT1     | LGTN    |
| MAPKAP1   | FLT3     | LHCGR   |
| MAPKAPK5  | FLVCR1   | LHFPL2  |
| MAPRE1    | FLYWCH2  | LHPP    |
| MAPRE2    | FMC1     | LHX4    |
| MAPT      | FMN1     | LHX8    |
| MARCH2    | FMN2     | LHX9    |

|          |             |              |
|----------|-------------|--------------|
| MARCH3   | FMNL2       | LIF          |
| MARCH5   | FMNL3       | LIFR         |
| MARCH6   | FMO3        | LILRB4       |
| MARCH7   | FMOD        | LIMCH1       |
| MARCH8   | FMR1        | LIMS1        |
| MARF1    | FN1         | LIMS2        |
| MARK1    | FN3KRP      | LIN28A       |
| MARK4    | FNBP1       | LIN54        |
| MARS     | FNBP1L      | LIN7A        |
| MARS2    | FNDC3A      | LINC00346    |
| MARVELD1 | FNDC3B      | LINC00908    |
| MASTL    | FNDC4       | LINC01460    |
| MAT1A    | FNIP1       | LINC01546    |
| MAT2A    | FNIP2       | LINC01559    |
| MAU2     | FNTB        | LINC01664    |
| MAVS     | FOPNL       | LINC01973    |
| MAZ      | FOSL2       | LINC02312    |
| MBD2     | FOXA1       | LINS1        |
| MBD5     | FOXA2       | LIPC         |
| MBD6     | FOXA3       | LIPG         |
| MBLAC2   | FOXB1       | LIPT2        |
| MBNL1    | FOXC1       | LITAF        |
| MBNL3    | FOXD3       | LIX1         |
| MBP      | FOXD4       | LLPH         |
| MCC      | FOXD4L1     | LMAN2L       |
| MCCC2    | FOXD4L3     | LMBR1        |
| MCF2L    | FOXE1       | LMBRD2       |
| MCF2L2   | FOXE3       | LMO3         |
| MCFD2    | FOXF2       | LMO4         |
| MCHR2    | FOXJ2       | LMO7         |
| MCL1     | FO XK1      | LMOD1        |
| MCM10    | FO XK2      | LMTK2        |
| MCM3     | FOXL1       | LMX1A        |
| MCM3AP   | FOXN2       | LMX1B        |
| MCM7     | FOXN3       | LNP1         |
| MCM8     | FOXO1       | LNPEP        |
| MCMBP    | FOXO3       | LNPK         |
| MCMD C2  | FOXP1       | LN X1        |
| MCOLN2   | FOXP2       | LN X2        |
| MCOLN3   | FOXR2       | LOC100129215 |
| MCTP1    | FPGT        | LOC100996419 |
| MCTP2    | FPGT-TNNI3K | LOC105371730 |
| MCTS1    | FPR1        | LOC107983990 |
| MCU      | FPR2        | LOC400464    |



|          |          |           |
|----------|----------|-----------|
| MCUR1    | FRA10AC1 | LOC401589 |
| MDH2     | FRAS1    | LOC644656 |
| MDM1     | FRAT1    | LOC730098 |
| MDM2     | FRAT2    | LOC730338 |
| MDM4     | FREM2    | LONP2     |
| MDN1     | FRG2     | LONRF2    |
| MEA1     | FRG2C    | LONRF3    |
| MECP2    | FRK      | LOXL3     |
| MED1     | FRMD3    | LPAR1     |
| MED12L   | FRMD4B   | LPAR3     |
| MED13L   | FRMD5    | LPAR5     |
| MED17    | FRMD6    | LPCAT1    |
| MED21    | FRMD7    | LPCAT2    |
| MED28    | FRMPD4   | LPGAT1    |
| MED29    | FRRS1    | LPP       |
| MED7     | FRRS1L   | LRAT      |
| MED8     | FRS2     | LRATD1    |
| MED9     | FRYL     | LRATD2    |
| MEF2C    | FRZB     | LRCH1     |
| MEF2D    | FSBP     | LRCH2     |
| MEGF9    | FSCB     | LRFN2     |
| MEI4     | FSCN1    | LRIF1     |
| MEIS1    | FSD1L    | LRIG3     |
| MELK     | FSD2     | LRP10     |
| MELTF    | FSHB     | LRP12     |
| MEMO1    | FSHR     | LRP5L     |
| MEOX1    | FST      | LRP6      |
| MESD     | FSTL1    | LRRC14    |
| MESP1    | FSTL4    | LRRC14B   |
| MEST     | FSTL5    | LRRC15    |
| METAP1   | FTCDNL1  | LRRC19    |
| METTL14  | FTO      | LRRC2     |
| METTL15  | FTSJ3    | LRRC20    |
| METTL16  | FUBP1    | LRRC28    |
| METTL21A | FUBP3    | LRRC3     |
| METTL22  | FUCA1    | LRRC34    |
| METTL24  | FUNDC2   | LRRC40    |
| METTL2A  | FURIN    | LRRC57    |
| METTL8   | FUS      | LRRC58    |
| MEX3A    | FUT11    | LRRC7     |
| MEX3B    | FUT4     | LRRC75A   |
| MFAP3L   | FUT5     | LRRC8B    |
| MFN1     | FUT6     | LRRC8C    |
| MFN2     | FUT8     | LRRC8D    |

|           |           |         |
|-----------|-----------|---------|
| MFSD13A   | FUT9      | LRRCC1  |
| MFSD14C   | FXN       | LRRN1   |
| MFSD4A    | FXR1      | LRRTM2  |
| MFSD6     | FXYD5     | LRSAM1  |
| MFSD9     | FYB1      | LSAMP   |
| MGA       | FYB2      | LSG1    |
| MGAT2     | FYCO1     | LSM10   |
| MGAT4B    | FYN       | LSM14A  |
| MGAT5     | FYTTD1    | LSM6    |
| MGMT      | FZD1      | LSM8    |
| MGP       | FZD2      | LSMEM1  |
| MGST3     | FZD3      | LTBP2   |
| MIA3      | FZD4      | LTF     |
| MIB1      | FZD5      | LTO1    |
| MICA      | FZD6      | LUC7L   |
| MICAL3    | FZD7      | LUC7L3  |
| MICOS10   | FZD8      | LUZP2   |
| MIDN      | FZR1      | LY6D    |
| MIEF1     | G2E3      | LY6E    |
| MIEF2     | G3BP1     | LY6K    |
| MIER1     | G3BP2     | LY75    |
| MIER3     | G6PC      | LY9     |
| MIGA1     | G6PC2     | LYN     |
| MIGA2     | GAB1      | LYPD6   |
| MINAR1    | GAB2      | LYPLA1  |
| MINDY2    | GAB3      | LYPLA2  |
| MINK1     | GABARAPL1 | LYRM2   |
| MIP       | GABBR2    | LYRM4   |
| MIPOL1    | GABPA     | LYRM7   |
| MIR2052HG | GABPB1    | LYRM9   |
| MIS12     | GABPB2    | LYSMD1  |
| MITF      | GABRA1    | LYSMD2  |
| MKI67     | GABRA3    | LYVE1   |
| MKKS      | GABRA4    | LZTFL1  |
| MKLN1     | GABRA5    | LZTS1   |
| MKNK1     | GABRB1    | M1AP    |
| MLEC      | GABRB3    | M6PR    |
| MLIP      | GABRE     | MAB21L1 |
| MLLT10    | GABRG1    | MACROD2 |
| MLX       | GABRP     | MAD2L1  |
| MLXIP     | GABRR1    | MAGEB10 |
| MMD2      | GABRR2    | MAGEB2  |
| MME       | GAD1      | MAGEL2  |
| MMP1      | GAD2      | MAGI1   |

|          |         |           |
|----------|---------|-----------|
| MMP13    | GADL1   | MAGI2     |
| MMP14    | GAGE1   | MAGI3     |
| MMP16    | GALK2   | MAGOHB    |
| MMP19    | GALNS   | MAK16     |
| MMP24    | GALNT1  | MALSU1    |
| MNT      | GALNT10 | MAML1     |
| MOAP1    | GALNT13 | MAML3     |
| MOB1A    | GALNT15 | MAMLD1    |
| MOB1B    | GALNT17 | MAN1C1    |
| MOB3B    | GALNT3  | MAN2A1    |
| MOB4     | GALNT4  | MAN2B2    |
| MOBP     | GALNT5  | MANEAL    |
| MOCS2    | GALNT6  | MAP1B     |
| MOCS3    | GALNT7  | MAP1LC3B  |
| MON1B    | GALNT8  | MAP2K4    |
| MON2     | GALNTL6 | MAP2K6    |
| MORC2    | GALR1   | MAP3K10   |
| MORC3    | GALR2   | MAP3K13   |
| MORF4L1  | GANC    | MAP3K2    |
| MORF4L2  | GAP43   | MAP3K20   |
| MORN4    | GAPT    | MAP3K3    |
| MOSMO    | GAPVD1  | MAP3K7    |
| MOXD1    | GAR1    | MAP3K8    |
| MPC2     | GAREM1  | MAP3K9    |
| MPHOSPH8 | GARNL3  | MAP4K2    |
| MPI      | GART    | MAP4K4    |
| MPP5     | GAS1    | MAP4K5    |
| MPPE1    | GAS2    | MAP6      |
| MPPED1   | GAS2L3  | MAP7      |
| MPRIP    | GAS7    | MAP9      |
| MPV17L   | GASK1A  | MAPK1     |
| MPZL1    | GASK1B  | MAPK10    |
| MPZL2    | GATA3   | MAPK13    |
| MPZL3    | GATA6   | MAPK14    |
| MRAP     | GATAD1  | MAPK1IP1L |
| MRAP2    | GATAD2B | MAPK8     |
| MRAS     | GATC    | MAPK8IP1  |
| MRE11    | GATD3A  | MAPK9     |
| MRGBP    | GATM    | MAPKAP1   |
| MRGPRF   | GBE1    | MAPRE1    |
| MRGPRX2  | GBP1    | MAPRE2    |
| MRI1     | GBP2    | MAPT      |
| MRM3     | GBP3    | MARCH3    |
| MRO      | GBP4    | MARCH5    |

|         |        |          |
|---------|--------|----------|
| MROH1   | GBP6   | MARCH6   |
| MROH6   | GBP7   | MARCH7   |
| MROH8   | GBX2   | MARCH8   |
| MRPL15  | GCA    | MARF1    |
| MRPL17  | GCC1   | MARK1    |
| MRPL19  | GCC2   | MARK4    |
| MRPL22  | GCFC2  | MARS2    |
| MRPL3   | GCH1   | MARVELD1 |
| MRPL30  | GCLM   | MASTL    |
| MRPL33  | GCM2   | MAT1A    |
| MRPL50  | GCNT1  | MAT2A    |
| MRPL57  | GCNT2  | MAU2     |
| MRPS14  | GCNT3  | MAVS     |
| MRPS24  | GCOM1  | MBD1     |
| MRPS25  | GCSAML | MBD2     |
| MRPS30  | GCSH   | MBD5     |
| MRPS35  | GDA    | MBD6     |
| MRPS7   | GDAP1  | MBLAC2   |
| MRRF    | GDAP2  | MBNL1    |
| MRS2    | GDE1   | MBNL2    |
| MRTFA   | GDF11  | MBNL3    |
| MRTO4   | GDF6   | MBOAT7   |
| MS4A15  | GDF7   | MBP      |
| MSANTD2 | GDI1   | MC2R     |
| MSANTD3 | GDI2   | MCC      |
| MSANTD4 | GNDF   | MCCC2    |
| MSH3    | GDPD1  | MCEMP1   |
| MSH6    | GDPD4  | MCF2L    |
| MSI2    | GDPGP1 | MCF2L2   |
| MSL1    | GEMIN2 | MCFD2    |
| MSL2    | GEMIN4 | MCHR2    |
| MSL3    | GEMIN7 | MCM10    |
| MSN     | GEMIN8 | MCM3AP   |
| MSRB3   | GEN1   | MCM8     |
| MSTN    | GFI1   | MCMBP    |
| MT1A    | GFM1   | MCMDC2   |
| MT1F    | GFM2   | MCOLN2   |
| MTA2    | GFOD1  | MCOLN3   |
| MTDH    | GFPT1  | MCPH1    |
| MTERF1  | GFRA1  | MCTP1    |
| MTERF2  | GFRA2  | MCTP2    |
| MTERF4  | GGA2   | MCTS1    |
| MTF1    | GGCX   | MCU      |
| MTFR1   | GHITM  | MCUR1    |

|                 |                 |                 |
|-----------------|-----------------|-----------------|
| <i>MTFR2</i>    | <i>GHR</i>      | <i>MDFIC</i>    |
| <i>MTHFD2</i>   | <i>GHRL</i>     | <i>MDM1</i>     |
| <i>MTHFS</i>    | <i>GHSR</i>     | <i>MDM2</i>     |
| <i>MTMR1</i>    | <i>GID8</i>     | <i>MDM4</i>     |
| <i>MTMR10</i>   | <i>GIMAP1</i>   | <i>MDN1</i>     |
| <i>MTMR2</i>    | <i>GIMAP4</i>   | <i>MECP2</i>    |
| <i>MTMR3</i>    | <i>GIMAP5</i>   | <i>MED1</i>     |
| <i>MTMR6</i>    | <i>GIMAP8</i>   | <i>MED11</i>    |
| <i>MTMR8</i>    | <i>GIN1</i>     | <i>MED12L</i>   |
| <i>MTMR9</i>    | <i>GINM1</i>    | <i>MED13L</i>   |
| <i>MTR</i>      | <i>GINS1</i>    | <i>MED17</i>    |
| <i>MTRNR2L3</i> | <i>GINS2</i>    | <i>MED20</i>    |
| <i>MTRNR2L4</i> | <i>GINS3</i>    | <i>MED21</i>    |
| <i>MTRNR2L5</i> | <i>GINS4</i>    | <i>MED23</i>    |
| <i>MTRNR2L6</i> | <i>GIPC2</i>    | <i>MED28</i>    |
| <i>MTURN</i>    | <i>GIPC3</i>    | <i>MED29</i>    |
| <i>MTX3</i>     | <i>GIPR</i>     | <i>MED7</i>     |
| <i>MUC15</i>    | <i>GIT2</i>     | <i>MED8</i>     |
| <i>MUC21</i>    | <i>GJA3</i>     | <i>MED9</i>     |
| <i>MUCL3</i>    | <i>GJB2</i>     | <i>MEDAG</i>    |
| <i>MUSK</i>     | <i>GJB4</i>     | <i>MEF2A</i>    |
| <i>MXD1</i>     | <i>GJB6</i>     | <i>MEF2C</i>    |
| <i>MXD3</i>     | <i>GJB7</i>     | <i>MEF2D</i>    |
| <i>MXD4</i>     | <i>GJC1</i>     | <i>MEGF8</i>    |
| <i>MXI1</i>     | <i>GJE1</i>     | <i>MEGF9</i>    |
| <i>MYB</i>      | <i>GK</i>       | <i>MEI4</i>     |
| <i>MYBL1</i>    | <i>GK2</i>      | <i>MEIS1</i>    |
| <i>MYC</i>      | <i>GK5</i>      | <i>MELK</i>     |
| <i>MYCL</i>     | <i>GKN1</i>     | <i>MELTF</i>    |
| <i>MYCT1</i>    | <i>GLA</i>      | <i>MEMO1</i>    |
| <i>MYEF2</i>    | <i>GLB1</i>     | <i>MEOX2</i>    |
| <i>MYH9</i>     | <i>GLCCI1</i>   | <i>MEPE</i>     |
| <i>MYL2</i>     | <i>GLDC</i>     | <i>MESD</i>     |
| <i>MYLIP</i>    | <i>GLDN</i>     | <i>MESP1</i>    |
| <i>MYLK3</i>    | <i>GLG1</i>     | <i>MEST</i>     |
| <i>MYNN</i>     | <i>GLI3</i>     | <i>METAP1</i>   |
| <i>MYO10</i>    | <i>GLIPR1</i>   | <i>METAP2</i>   |
| <i>MYO16</i>    | <i>GLIPR1L2</i> | <i>METTL14</i>  |
| <i>MYO1F</i>    | <i>GLIPR2</i>   | <i>METTL15</i>  |
| <i>MYO5A</i>    | <i>GLIS3</i>    | <i>METTL16</i>  |
| <i>MYO6</i>     | <i>GLMN</i>     | <i>METTL21A</i> |
| <i>MYOD1</i>    | <i>GLO1</i>     | <i>METTL22</i>  |
| <i>MYOG</i>     | <i>GLOD4</i>    | <i>METTL24</i>  |
| <i>MYOM2</i>    | <i>GLP2R</i>    | <i>METTL2A</i>  |

|          |         |           |
|----------|---------|-----------|
| MYORG    | GLRA2   | METTL8    |
| MYOZ2    | GLRA3   | MEX3A     |
| MYT1     | GLRB    | MEX3B     |
| MYT1L    | GLRX    | MFAP3L    |
| N4BP1    | GLRX2   | MFN1      |
| N4BP3    | GLS     | MFN2      |
| N6AMT1   | GLTP    | MFSD14C   |
| NAA15    | GLUD1   | MFSD2A    |
| NAA25    | GLUD2   | MFSD4A    |
| NAA30    | GLUL    | MFSD6     |
| NAA35    | GLYAT   | MFSD9     |
| NAA38    | GLYATL2 | MGA       |
| NAA50    | GLYATL3 | MGAT5     |
| NAA60    | GLYR1   | MGME1     |
| NAAA     | GM2A    | MGMT      |
| NAALADL2 | GMCL1   | MGP       |
| NABP1    | GMEB1   | MGST3     |
| NABP2    | GMEB2   | MIA3      |
| NADK     | GMFB    | MICA      |
| NAF1     | GMNC    | MICAL3    |
| NAGS     | GMPR    | MICOS10   |
| NANOS1   | GMPS    | MIDN      |
| NANOS2   | GNA11   | MIEF1     |
| NANP     | GNA12   | MIEN1     |
| NAP1L1   | GNA13   | MIER1     |
| NAP1L2   | GNAI3   | MIER3     |
| NAP1L3   | GNAL    | MIGA2     |
| NAP1L4   | GNAO1   | MINAR1    |
| NAP1L5   | GNAQ    | MINDY2    |
| NAPA     | GNAS    | MIPOL1    |
| NAPEPLD  | GNAT1   | MIR2052HG |
| NAPG     | GNB1    | MIS12     |
| NARS     | GNB4    | MITF      |
| NAT1     | GNE     | MKI67     |
| NAT8     | GNG10   | MKKS      |
| NBEA     | GNG12   | MKLN1     |
| NBEAL1   | GNG2    | MKNK1     |
| NBEAL2   | GNG4    | MKRN3     |
| NBN      | GNG5    | MLEC      |
| NBPF3    | GNG7    | MLH3      |
| NCALD    | GNGT2   | MLIP      |
| NCAPD2   | GNL1    | MLLT10    |
| NCAPD3   | GNL3    | MLLT3     |
| NCAPG    | GNL3L   | MLX       |

|         |          |         |
|---------|----------|---------|
| NCAPH   | GNPAT    | MLXIP   |
| NCAPH2  | GNPDA1   | MMD2    |
| NCBP1   | GNPDA2   | MME     |
| NCF1    | GNPTAB   | MMP1    |
| NCK1    | GNPTG    | MMP14   |
| NCK2    | GNRH1    | MMP16   |
| NCKAP1  | GNRHR    | MMP19   |
| NCKAP5  | GOLGA1   | MMP2    |
| NCKAP5L | GOLGA3   | MMP24   |
| NCKIPSD | GOLGA6A  | MNT     |
| NCOA7   | GOLGA6B  | MOAP1   |
| NCOR1   | GOLGA6C  | MOB1A   |
| NCR3LG1 | GOLGA6D  | MOB1B   |
| NCS1    | GOLGA6L4 | MOB3B   |
| NDC1    | GOLGA7   | MOB3C   |
| NDE1    | GOLGA7B  | MOB4    |
| NDEL1   | GOLGA8B  | MOBP    |
| NDFIP1  | GOLGA8F  | MOCS2   |
| NDNF    | GOLGA8H  | MOCS3   |
| NDOR1   | GOLGA8K  | MON1B   |
| NDST3   | GOLGA8M  | MON2    |
| NDUFA1  | GOLGA8N  | MORC2   |
| NDUFA5  | GOLGA8O  | MORC3   |
| NDUFA7  | GOLGA8R  | MORF4L1 |
| NDUFAF6 | GOLGB1   | MORF4L2 |
| NDUFB3  | GOLIM4   | MORN4   |
| NDUFB5  | GOLM1    | MOSMO   |
| NDUFC1  | GOLPH3L  | MOXD1   |
| NDUFC2  | GOLT1B   | MPC2    |
| NDUFV3  | GON7     | MPI     |
| NEBL    | GOPC     | MPP5    |
| NECAB1  | GORAB    | MPPED1  |
| NECAB3  | GORASP1  | MPPED2  |
| NECAP2  | GORASP2  | MPRIP   |
| NECTIN1 | GOSR1    | MPV17L  |
| NECTIN3 | GOT2     | MPZL1   |
| NEFH    | GP1BA    | MPZL2   |
| NEGR1   | GP5      | MPZL3   |
| NEK2    | GPAM     | MRAP    |
| NEK4    | GPANK1   | MRAP2   |
| NEK7    | GPAT4    | MRAS    |
| NEK8    | GPATCH1  | MRE11   |
| NEK9    | GPATCH11 | MRGBP   |
| NENF    | GPATCH2  | MRGPRF  |

|         |          |         |
|---------|----------|---------|
| NEPRO   | GPATCH2L | MRGPRX2 |
| NET1    | GPBP1    | MRI1    |
| NETO1   | GPBP1L1  | MRM3    |
| NETO2   | GPC1     | MRO     |
| NEU3    | GPC4     | MRPL15  |
| NEURL1  | GPC5     | MRPL17  |
| NEURL1B | GPC6     | MRPL19  |
| NEUROD2 | GPCPD1   | MRPL22  |
| NEUROG2 | GPD1L    | MRPL3   |
| NEXMIF  | GPD2     | MRPL30  |
| NFAT5   | GPHN     | MRPL33  |
| NFATC2  | GPKOW    | MRPL43  |
| NFATC3  | GPLD1    | MRPL44  |
| NFATC4  | GPM6A    | MRPL50  |
| NFIB    | GPM6B    | MRPL57  |
| NFIC    | GPNMB    | MRPS14  |
| NFKBID  | GPR1     | MRPS18B |
| NFS1    | GPR107   | MRPS18C |
| NFYB    | GPR12    | MRPS23  |
| NFYC    | GPR135   | MRPS24  |
| NGB     | GPR137B  | MRPS25  |
| NGRN    | GPR137C  | MRPS27  |
| NHLRC2  | GPR141   | MRPS30  |
| NHLRC3  | GPR15    | MRPS35  |
| NHS     | GPR150   | MRPS7   |
| NHSL1   | GPR151   | MRRF    |
| NIBAN1  | GPR155   | MRS2    |
| NIFK    | GPR156   | MRTFA   |
| NINJ1   | GPR157   | MRTO4   |
| NIPA1   | GPR158   | MSANTD2 |
| NIPA2   | GPR160   | MSANTD3 |
| NIPAL2  | GPR161   | MSANTD4 |
| NIPAL4  | GPR17    | MSH2    |
| NIPBL   | GPR173   | MSH3    |
| NISCH   | GPR174   | MSH6    |
| NIT1    | GPR176   | MSI2    |
| NIT2    | GPR18    | MSL1    |
| NKAIN1  | GPR180   | MSL2    |
| NKAIN3  | GPR183   | MSL3    |
| NKAP    | GPR22    | MSN     |
| NKAPD1  | GPR26    | MSRB3   |
| NKAPL   | GPR34    | MSTN    |
| NKD1    | GPR37    | MT1A    |
| NKIRAS2 | GPR39    | MT1F    |



|        |         |          |
|--------|---------|----------|
| NKRF   | GPR45   | MTDH     |
| NKTR   | GPR50   | MTERF1   |
| NKX2-1 | GPR62   | MTERF2   |
| NKX2-4 | GPR63   | MTERF4   |
| NKX3-2 | GPR65   | MTF1     |
| NLE1   | GPR75   | MTF2     |
| NLGN4X | GPR78   | MTFR1    |
| NLK    | GPR82   | MTFR2    |
| NLN    | GPR85   | MTHFD2   |
| NLRP1  | GPR88   | MTHFS    |
| NLRP3  | GPR89A  | MTM1     |
| NLRP9  | GPR89B  | MTMR1    |
| NME6   | GPRASP1 | MTMR10   |
| NMNAT1 | GPRASP2 | MTMR2    |
| NMNAT2 | GPRC5A  | MTMR3    |
| NMT2   | GPRC5B  | MTMR6    |
| NNT    | GPRIN2  | MTMR7    |
| NOA1   | GPRIN3  | MTMR8    |
| NOCT   | GPSM2   | MTMR9    |
| NOL12  | GPT2    | MTO1     |
| NOL4   | GPX8    | MTR      |
| NOL9   | GRAMD1A | MTRNR2L3 |
| NOLC1  | GRAMD2A | MTRNR2L4 |
| NOM1   | GRAMD2B | MTRNR2L5 |
| NOMO1  | GRAP2   | MTRNR2L6 |
| NOMO3  | GRB14   | MTSS2    |
| NOP9   | GREB1   | MTTP     |
| NOS1   | GREM1   | MTURN    |
| NOS1AP | GREM2   | MTUS1    |
| NOTCH2 | GRHL3   | MTX3     |
| NOTCH3 | GRHPR   | MUC15    |
| NOVA1  | GRIA1   | MUC21    |
| NOVA2  | GRIA2   | MUCL3    |
| NOX1   | GRIA4   | MUSK     |
| NOX4   | GRID2   | MVK      |
| NPAP1  | GRIK2   | MXD1     |
| NPAS4  | GRIK3   | MXD3     |
| NPBWR1 | GRIK4   | MXD4     |
| NPC1   | GRIN2A  | MXI1     |
| NPC2   | GRIN2B  | MYB      |
| NPFFR1 | GRIN3A  | MYBL1    |
| NPHP3  | GRIP1   | MYBPC1   |
| NPL    | GRK1    | MYCBP    |
| NPLOC4 | GRK3    | MYCL     |

|         |         |         |
|---------|---------|---------|
| NPNT    | GRK5    | MYCT1   |
| NPR2    | GRK7    | MYEF2   |
| NPR3    | GRM1    | MYH9    |
| NPTX1   | GRM4    | MYLIP   |
| NPTXR   | GRM6    | MYLK3   |
| NR0B1   | GRPEL1  | MYNN    |
| NR1D2   | GRPEL2  | MYO10   |
| NR1I2   | GRPR    | MYO16   |
| NR2C1   | GRSF1   | MYO1A   |
| NR2C2   | GRTF1   | MYO1F   |
| NR2C2AP | GRWD1   | MYO5A   |
| NR2E1   | GSC2    | MYO6    |
| NR2F6   | GSDMA   | MYO7A   |
| NR3C1   | GSDMC   | MYO9B   |
| NR5A2   | GSE1    | MYOCD   |
| NR6A1   | GSG1    | MYOD1   |
| NRARP   | GSK3B   | MYOG    |
| NRF1    | GSKIP   | MYOM2   |
| NRG1    | GSPT1   | MYORG   |
| NRG3    | GSPT2   | MYOZ2   |
| NRG4    | GSR     | MYT1    |
| NRK     | GSTK1   | MYT1L   |
| NRP1    | GSTO1   | N4BP1   |
| NRP2    | GSTO2   | N4BP2L2 |
| NRXN1   | GTDC1   | N4BP3   |
| NRXN3   | GTF2A1  | N6AMT1  |
| NSD2    | GTF2A2  | NAA15   |
| NSL1    | GTF2B   | NAA25   |
| NSMCE3  | GTF2E1  | NAA30   |
| NSMCE4A | GTF2E2  | NAA35   |
| NSMF    | GTF2F1  | NAA38   |
| NSUN4   | GTF2H2C | NAA50   |
| NSUN5   | GTF2H3  | NAA60   |
| NSUN7   | GTF2H5  | NAAA    |
| NT5C1A  | GTF3C3  | NABP1   |
| NT5C2   | GTF3C4  | NABP2   |
| NT5DC1  | GTF3C6  | NADK    |
| NT5M    | GTPBP1  | NAF1    |
| NTF3    | GTPBP10 | NAGS    |
| NTM     | GTPBP4  | NAIP    |
| NTPCR   | GTPBP8  | NAMPT   |
| NTRK2   | GUCA1A  | NANOS1  |
| NTSR1   | GUCA1C  | NANOS2  |
| NUAK1   | GUCY1A1 | NANP    |

|        |         |         |
|--------|---------|---------|
| NUDCD2 | GUCY1A2 | NAP1L1  |
| NUDCD3 | GUCY1B1 | NAP1L2  |
| NUDT13 | GUCY2C  | NAP1L3  |
| NUDT16 | GUF1    | NAP1L4  |
| NUDT21 | GULP1   | NAP1L5  |
| NUDT3  | GVQW3   | NAPA    |
| NUF2   | GXYLT1  | NAPEPLD |
| NUFIP1 | GXYLT2  | NAPG    |
| NUFIP2 | GYG1    | NARS    |
| NUMBL  | GYG2    | NAT1    |
| NUP155 | GYPA    | NAT10   |
| NUP160 | GYPE    | NAT8    |
| NUP205 | GYS1    | NBEA    |
| NUP35  | GYS2    | NBEAL1  |
| NUP43  | GZF1    | NBEAL2  |
| NUP58  | H1FOO   | NBN     |
| NUP88  | H2AFJ   | NBPF3   |
| NUP93  | H2AFV   | NCALD   |
| NUS1   | H2BFM   | NCAPD3  |
| NUTF2  | H3F3B   | NCAPG   |
| NUTM2D | H6PD    | NCAPH   |
| NUTM2E | HAAO    | NCAPH2  |
| NUTM2G | HACD2   | NCF1    |
| NWD1   | HACD3   | NCK1    |
| NWD2   | HACD4   | NCK2    |
| NXN    | HACE1   | NCKAP1  |
| NXPH1  | HADHB   | NCKAP5  |
| NXT2   | HAL     | NCKIPSD |
| NYAP2  | HAND2   | NCL     |
| OAS2   | HAO1    | NCOA7   |
| OAS3   | HAPLN1  | NCOR1   |
| OAZ2   | HARBI1  | NCR3LG1 |
| OCIAD2 | HAS2    | NCS1    |
| OCRL   | HAUS2   | NDE1    |
| ODAPH  | HAUS3   | NDEL1   |
| ODC1   | HAUS5   | NDFIP1  |
| ODF2L  | HAUS6   | NDNF    |
| OGDH   | HAUS8   | NDOR1   |
| OGFOD1 | HAVCR1  | NDST3   |
| OGFOD3 | HAVCR2  | NDUFA1  |
| OGFRL1 | HBEGF   | NDUFA5  |
| OIP5   | HBP1    | NDUFA7  |
| OLA1   | HBS1L   | NDUFAF6 |
| OLFM1  | HCAR1   | NDUFB3  |

|         |         |         |
|---------|---------|---------|
| OLFM4   | HCAR2   | NDUFB5  |
| OLIG2   | HCAR3   | NDUFC1  |
| ONECUT1 | HCCS    | NDUFC2  |
| ONECUT2 | HCFC2   | NDUFS1  |
| OPA3    | HCLS1   | NDUFV3  |
| OPALIN  | HCN1    | NEBL    |
| OPCML   | HDAC11  | NECAB1  |
| OPHN1   | HDAC2   | NECAB3  |
| OPN1MW2 | HDAC4   | NECAP2  |
| OPRK1   | HDAC5   | NECTIN1 |
| OPRM1   | HDAC8   | NECTIN3 |
| OR10H5  | HDAC9   | NEFH    |
| OR1L8   | HDGF    | NEGR1   |
| OR2A4   | HDGFL3  | NEIL2   |
| OR2B11  | HDHD2   | NEK10   |
| OR51E1  | HDHD5   | NEK2    |
| ORAI2   | HDX     | NEK7    |
| ORAI3   | HEATR1  | NEK8    |
| ORM1    | HEATR3  | NEK9    |
| ORMDL2  | HEATR5B | NEMP1   |
| ORMDL3  | HEATR6  | NENF    |
| OS9     | HEBP2   | NEPRO   |
| OSBP2   | HECA    | NET1    |
| OSBPL10 | HECTD1  | NETO1   |
| OSBPL2  | HECTD2  | NETO2   |
| OSBPL3  | HECW1   | NEU3    |
| OSBPL6  | HECW2   | NEURL1  |
| OSBPL7  | HEG1    | NEURL1B |
| OSBPL8  | HELB    | NEURL4  |
| OSGIN2  | HELLS   | NEUROD2 |
| OSMR    | HELQ    | NEUROD4 |
| OSTM1   | HELZ    | NEUROG2 |
| OTUB2   | HEMK1   | NEXMIF  |
| OTUD4   | HENMT1  | NFAT5   |
| OTULINL | HEPACAM | NFATC2  |
| OTX2    | HEPH    | NFATC3  |
| OXA1L   | HEPHL1  | NFATC4  |
| OXCT1   | HERC2   | NFIB    |
| OXNAD1  | HERC3   | NFIC    |
| OXR1    | HERC4   | NFKBID  |
| OXSRI   | HERPUD2 | NFS1    |
| OXTR    | HES2    | NFX1    |
| P2RX4   | HEXIM1  | NFYA    |
| P2RY1   | HEXIM2  | NFYB    |

|                   |                  |                |
|-------------------|------------------|----------------|
| <i>P2RY12</i>     | <i>HEY2</i>      | <i>NFYC</i>    |
| <i>P2RY2</i>      | <i>HEYL</i>      | <i>NGB</i>     |
| <i>P4HA2</i>      | <i>HFE</i>       | <i>NGRN</i>    |
| <i>PABPC3</i>     | <i>HFM1</i>      | <i>NHLRC2</i>  |
| <i>PABPN1</i>     | <i>HGF</i>       | <i>NHLRC3</i>  |
| <i>PACRGL</i>     | <i>HGFAC</i>     | <i>NHLRC4</i>  |
| <i>PACS1</i>      | <i>HGS</i>       | <i>NHS</i>     |
| <i>PACS2</i>      | <i>HGSNAT</i>    | <i>NHSL1</i>   |
| <i>PADI1</i>      | <i>HHEX</i>      | <i>NIBAN1</i>  |
| <i>PADI2</i>      | <i>HHIP</i>      | <i>NIBAN3</i>  |
| <i>PAF1</i>       | <i>HHIPL1</i>    | <i>NIFK</i>    |
| <i>PAFAH1B2</i>   | <i>HIBADH</i>    | <i>NIN</i>     |
| <i>PAG1</i>       | <i>HIF1A</i>     | <i>NINJ1</i>   |
| <i>PAGR1</i>      | <i>HIF3A</i>     | <i>NIPA1</i>   |
| <i>PAH</i>        | <i>HIGD1A</i>    | <i>NIPA2</i>   |
| <i>PAICS</i>      | <i>HIKESHI</i>   | <i>NIPAL2</i>  |
| <i>PAIP1</i>      | <i>HINT1</i>     | <i>NIPAL4</i>  |
| <i>PAIP2</i>      | <i>HINT3</i>     | <i>NIPBL</i>   |
| <i>PAIP2B</i>     | <i>HIP1</i>      | <i>NISCH</i>   |
| <i>PAK1</i>       | <i>HIPK1</i>     | <i>NIT1</i>    |
| <i>PAK1IP1</i>    | <i>HIPK2</i>     | <i>NIT2</i>    |
| <i>PAK2</i>       | <i>HIPK3</i>     | <i>NKAIN1</i>  |
| <i>PAK3</i>       | <i>HIPK4</i>     | <i>NKAIN3</i>  |
| <i>PALLD</i>      | <i>HIST1H2AE</i> | <i>NKAP</i>    |
| <i>PAN2</i>       | <i>HIST1H2AG</i> | <i>NKAPL</i>   |
| <i>PANK1</i>      | <i>HIST1H2AH</i> | <i>NKD1</i>    |
| <i>PANK3</i>      | <i>HIST1H2BD</i> | <i>NKIRAS1</i> |
| <i>PANK4</i>      | <i>HIST1H2BG</i> | <i>NKRF</i>    |
| <i>PAOX</i>       | <i>HIST1H4C</i>  | <i>NKTR</i>    |
| <i>PAPLN</i>      | <i>HIST2H2BE</i> | <i>NKX2-1</i>  |
| <i>PAPOLA</i>     | <i>HIVEP3</i>    | <i>NKX2-4</i>  |
| <i>PAPOLG</i>     | <i>HJURP</i>     | <i>NKX3-2</i>  |
| <i>PAPSS1</i>     | <i>HJV</i>       | <i>NLE1</i>    |
| <i>PAQR3</i>      | <i>HK2</i>       | <i>NLGN4X</i>  |
| <i>PARD3B</i>     | <i>HLA-DOA</i>   | <i>NLK</i>     |
| <i>PARD6G-AS1</i> | <i>HLA-DOB</i>   | <i>NLN</i>     |
| <i>PARK7</i>      | <i>HLA-DPA1</i>  | <i>NLRP1</i>   |
| <i>PARL</i>       | <i>HLA-DPB1</i>  | <i>NLRP3</i>   |
| <i>PARP14</i>     | <i>HLA-DQA1</i>  | <i>NLRP9</i>   |
| <i>PARP15</i>     | <i>HLA-DQA2</i>  | <i>NME2</i>    |
| <i>PARP4</i>      | <i>HLA-DRB1</i>  | <i>NME6</i>    |
| <i>PARP9</i>      | <i>HLA-DRB5</i>  | <i>NMNAT1</i>  |
| <i>PARVA</i>      | <i>HLA-E</i>     | <i>NMNAT2</i>  |
| <i>PARVB</i>      | <i>HLF</i>       | <i>NMT2</i>    |

|                 |                  |                |
|-----------------|------------------|----------------|
| <i>PARVG</i>    | <i>HLTF</i>      | <i>NNT</i>     |
| <i>PATL1</i>    | <i>HM13</i>      | <i>NOCT</i>    |
| <i>PATZ1</i>    | <i>HMBOX1</i>    | <i>NOD1</i>    |
| <i>PAWR</i>     | <i>HMG20A</i>    | <i>NOL11</i>   |
| <i>PAX1</i>     | <i>HMGA2</i>     | <i>NOL12</i>   |
| <i>PAX3</i>     | <i>HMGB1</i>     | <i>NOL3</i>    |
| <i>PAX5</i>     | <i>HMGB3</i>     | <i>NOL4L</i>   |
| <i>PAX7</i>     | <i>HMGCLL1</i>   | <i>NOL9</i>    |
| <i>PAX8</i>     | <i>HMGCR</i>     | <i>NOM1</i>    |
| <i>PAXBP1</i>   | <i>HMGCS1</i>    | <i>NOMO1</i>   |
| <i>PBRM1</i>    | <i>HMGN1</i>     | <i>NOMO3</i>   |
| <i>PBX1</i>     | <i>HMGN2</i>     | <i>NOP58</i>   |
| <i>PBX2</i>     | <i>HMGN4</i>     | <i>NOP9</i>    |
| <i>PBX3</i>     | <i>HMGN5</i>     | <i>NOS1</i>    |
| <i>PBXIP1</i>   | <i>HMGXB4</i>    | <i>NOS1AP</i>  |
| <i>PCARE</i>    | <i>HMMR</i>      | <i>NOTCH2</i>  |
| <i>PCBP2</i>    | <i>HMSD</i>      | <i>NOTCH3</i>  |
| <i>PCDH10</i>   | <i>HMX3</i>      | <i>NOVA1</i>   |
| <i>PCDH11X</i>  | <i>HNF4A</i>     | <i>NOX1</i>    |
| <i>PCDH15</i>   | <i>HNMT</i>      | <i>NOX4</i>    |
| <i>PCDH19</i>   | <i>HNRNPA0</i>   | <i>NPAP1</i>   |
| <i>PCDH20</i>   | <i>HNRNPA1</i>   | <i>NPAS4</i>   |
| <i>PCDH7</i>    | <i>HNRNPA2B1</i> | <i>NPBWR1</i>  |
| <i>PCDH9</i>    | <i>HNRNPA3</i>   | <i>NPC2</i>    |
| <i>PCDHA1</i>   | <i>HNRNPC</i>    | <i>NPFFR1</i>  |
| <i>PCDHA10</i>  | <i>HNRNPD</i>    | <i>NPL</i>     |
| <i>PCDHA11</i>  | <i>HNRNPDL</i>   | <i>NPLOC4</i>  |
| <i>PCDHA12</i>  | <i>HNRNPF</i>    | <i>NPM1</i>    |
| <i>PCDHA13</i>  | <i>HNRNPK</i>    | <i>NPNT</i>    |
| <i>PCDHA2</i>   | <i>HNRNPL</i>    | <i>NPPC</i>    |
| <i>PCDHA3</i>   | <i>HNRNPLL</i>   | <i>NPR2</i>    |
| <i>PCDHA4</i>   | <i>HNRNPR</i>    | <i>NPR3</i>    |
| <i>PCDHA5</i>   | <i>HNRNPU</i>    | <i>NPTX1</i>   |
| <i>PCDHA6</i>   | <i>HNRNPUL1</i>  | <i>NPTXR</i>   |
| <i>PCDHA7</i>   | <i>HNRNPUL2</i>  | <i>NQO1</i>    |
| <i>PCDHA8</i>   | <i>HOMER1</i>    | <i>NR0B1</i>   |
| <i>PCDHA9</i>   | <i>HOMEZ</i>     | <i>NR1D2</i>   |
| <i>PCDHAC1</i>  | <i>HOOK1</i>     | <i>NR1I2</i>   |
| <i>PCDHAC2</i>  | <i>HOOK3</i>     | <i>NR2C1</i>   |
| <i>PCDHGA1</i>  | <i>HOPX</i>      | <i>NR2C2</i>   |
| <i>PCDHGA10</i> | <i>HOXA1</i>     | <i>NR2C2AP</i> |
| <i>PCDHGA11</i> | <i>HOXA13</i>    | <i>NR2E1</i>   |
| <i>PCDHGA12</i> | <i>HOXA2</i>     | <i>NR2F6</i>   |
| <i>PCDHGA2</i>  | <i>HOXB2</i>     | <i>NR3C1</i>   |

|                |                 |                |
|----------------|-----------------|----------------|
| <i>PCDHGA3</i> | <i>HOXB3</i>    | <i>NR4A2</i>   |
| <i>PCDHGA4</i> | <i>HOXC10</i>   | <i>NR5A2</i>   |
| <i>PCDHGA5</i> | <i>HOXC11</i>   | <i>NR6A1</i>   |
| <i>PCDHGA6</i> | <i>HOXC4</i>    | <i>NRARP</i>   |
| <i>PCDHGA7</i> | <i>HOXC6</i>    | <i>NRF1</i>    |
| <i>PCDHGA8</i> | <i>HOXC8</i>    | <i>NRG1</i>    |
| <i>PCDHGA9</i> | <i>HOXD1</i>    | <i>NRG2</i>    |
| <i>PCDHGB1</i> | <i>HOXD11</i>   | <i>NRG3</i>    |
| <i>PCDHGB2</i> | <i>HOXD12</i>   | <i>NRG4</i>    |
| <i>PCDHGB3</i> | <i>HOXD3</i>    | <i>NRK</i>     |
| <i>PCDHGB4</i> | <i>HOXD4</i>    | <i>NRP1</i>    |
| <i>PCDHGB6</i> | <i>HOXD8</i>    | <i>NRXN1</i>   |
| <i>PCDHGB7</i> | <i>HOXD9</i>    | <i>NRXN3</i>   |
| <i>PCDHGC3</i> | <i>HP1BP3</i>   | <i>NSD2</i>    |
| <i>PCDHGC4</i> | <i>HPCA</i>     | <i>NSL1</i>    |
| <i>PCDHGC5</i> | <i>HPCAL4</i>   | <i>NSMCE3</i>  |
| <i>PCGF3</i>   | <i>HPDL</i>     | <i>NSMCE4A</i> |
| <i>PCLAF</i>   | <i>HPF1</i>     | <i>NSUN4</i>   |
| <i>PCNT</i>    | <i>HPGD</i>     | <i>NSUN5</i>   |
| <i>PCNX1</i>   | <i>HPR</i>      | <i>NSUN7</i>   |
| <i>PCSK1</i>   | <i>HPRT1</i>    | <i>NT5C1A</i>  |
| <i>PCSK9</i>   | <i>HPS3</i>     | <i>NT5DC1</i>  |
| <i>PCYOX1</i>  | <i>HPS4</i>     | <i>NT5DC2</i>  |
| <i>PCYT1A</i>  | <i>HPS5</i>     | <i>NT5M</i>    |
| <i>PCYT1B</i>  | <i>HPSE</i>     | <i>NTF3</i>    |
| <i>PCYT2</i>   | <i>HPX</i>      | <i>NTM</i>     |
| <i>PDAP1</i>   | <i>HRH4</i>     | <i>NTPCR</i>   |
| <i>PDCD10</i>  | <i>HRK</i>      | <i>NTRK2</i>   |
| <i>PDCD2</i>   | <i>HRNR</i>     | <i>NTSR1</i>   |
| <i>PDCD6IP</i> | <i>HS2ST1</i>   | <i>NUAK1</i>   |
| <i>PDCD7</i>   | <i>HS3ST1</i>   | <i>NUBPL</i>   |
| <i>PDCL</i>    | <i>HS3ST3A1</i> | <i>NUCKS1</i>  |
| <i>PDE10A</i>  | <i>HS3ST3B1</i> | <i>NUDCD2</i>  |
| <i>PDE11A</i>  | <i>HS6ST2</i>   | <i>NUDCD3</i>  |
| <i>PDE1C</i>   | <i>HS6ST3</i>   | <i>NUDT16</i>  |
| <i>PDE3A</i>   | <i>HSBP1</i>    | <i>NUDT21</i>  |
| <i>PDE4A</i>   | <i>HSD11B1</i>  | <i>NUDT3</i>   |
| <i>PDE4B</i>   | <i>HSD17B11</i> | <i>NUF2</i>    |
| <i>PDE4D</i>   | <i>HSD17B12</i> | <i>NUFIP1</i>  |
| <i>PDE4DIP</i> | <i>HSD17B13</i> | <i>NUFIP2</i>  |
| <i>PDE5A</i>   | <i>HSD17B6</i>  | <i>NUP155</i>  |
| <i>PDE6B</i>   | <i>HSDL1</i>    | <i>NUP160</i>  |
| <i>PDE7A</i>   | <i>HSDL2</i>    | <i>NUP205</i>  |
| <i>PDE7B</i>   | <i>HSF5</i>     | <i>NUP210</i>  |

|               |                   |                |
|---------------|-------------------|----------------|
| <i>PDGFA</i>  | <i>HSFY2</i>      | <i>NUP35</i>   |
| <i>PDGFD</i>  | <i>HSP90B1</i>    | <i>NUP43</i>   |
| <i>PDGFRB</i> | <i>HSPA12A</i>    | <i>NUP58</i>   |
| <i>PDHA1</i>  | <i>HSPA13</i>     | <i>NUP62CL</i> |
| <i>PDIA6</i>  | <i>HSPA14</i>     | <i>NUP88</i>   |
| <i>PDIK1L</i> | <i>HSPA1B</i>     | <i>NUP93</i>   |
| <i>PDK1</i>   | <i>HSPA1L</i>     | <i>NUS1</i>    |
| <i>PDLIM2</i> | <i>HSPA4</i>      | <i>NUTF2</i>   |
| <i>PDLIM5</i> | <i>HSPA4L</i>     | <i>NUTM2A</i>  |
| <i>PDP1</i>   | <i>HSPA5</i>      | <i>NUTM2D</i>  |
| <i>PDP2</i>   | <i>HSPA6</i>      | <i>NUTM2E</i>  |
| <i>PDPK1</i>  | <i>HSPB3</i>      | <i>NUTM2G</i>  |
| <i>PDS5A</i>  | <i>HSPB7</i>      | <i>NWD1</i>    |
| <i>PDS5B</i>  | <i>HSPB8</i>      | <i>NWD2</i>    |
| <i>PDSS2</i>  | <i>HSPBAP1</i>    | <i>NXF1</i>    |
| <i>PDXDC1</i> | <i>HSPD1</i>      | <i>NXN</i>     |
| <i>PEBP1</i>  | <i>HSPE1-MOB4</i> | <i>NXPH1</i>   |
| <i>PEG10</i>  | <i>HTATIP2</i>    | <i>NXT2</i>    |
| <i>PELI1</i>  | <i>HTR1D</i>      | <i>NYAP1</i>   |
| <i>PELI2</i>  | <i>HTR1E</i>      | <i>NYAP2</i>   |
| <i>PER1</i>   | <i>HTR1F</i>      | <i>OAS2</i>    |
| <i>PER2</i>   | <i>HTR2A</i>      | <i>OAS3</i>    |
| <i>PERP</i>   | <i>HTR2B</i>      | <i>OCA2</i>    |
| <i>PES1</i>   | <i>HTR2C</i>      | <i>OCIAD2</i>  |
| <i>PEX1</i>   | <i>HTR3B</i>      | <i>OCRL</i>    |
| <i>PEX11A</i> | <i>HTR3E</i>      | <i>ODAPH</i>   |
| <i>PEX11B</i> | <i>HTR5A</i>      | <i>ODC1</i>    |
| <i>PEX13</i>  | <i>HTR5A-AS1</i>  | <i>ODF2L</i>   |
| <i>PEX2</i>   | <i>HTRA1</i>      | <i>OGDH</i>    |
| <i>PEX26</i>  | <i>HTT</i>        | <i>OGFOD1</i>  |
| <i>PEX3</i>   | <i>HUNK</i>       | <i>OGFOD3</i>  |
| <i>PEX5L</i>  | <i>HUS1</i>       | <i>OGFRL1</i>  |
| <i>PFDN2</i>  | <i>HUWE1</i>      | <i>OIP5</i>    |
| <i>PFDN6</i>  | <i>HVCN1</i>      | <i>OIT3</i>    |
| <i>PFKFB2</i> | <i>HYAL4</i>      | <i>OLA1</i>    |
| <i>PFKFB4</i> | <i>HYKK</i>       | <i>OLFM1</i>   |
| <i>PFN1</i>   | <i>HYLS1</i>      | <i>OLFM4</i>   |
| <i>PFN2</i>   | <i>IAH1</i>       | <i>OLIG2</i>   |
| <i>PGAM1</i>  | <i>IAPP</i>       | <i>ONECUT1</i> |
| <i>PGAM4</i>  | <i>IARS2</i>      | <i>ONECUT2</i> |
| <i>PGAP1</i>  | <i>IBSP</i>       | <i>OPA3</i>    |
| <i>PGBD1</i>  | <i>IBTK</i>       | <i>OPALIN</i>  |
| <i>PGBD3</i>  | <i>ICA1L</i>      | <i>OPCML</i>   |
| <i>PGBD4</i>  | <i>ICAM1</i>      | <i>OPHN1</i>   |



|                |                |                |
|----------------|----------------|----------------|
| <i>PGGHG</i>   | <i>ICE1</i>    | <i>OPN1MW2</i> |
| <i>PGGT1B</i>  | <i>ICE2</i>    | <i>OPRK1</i>   |
| <i>PGLYRP1</i> | <i>ICK</i>     | <i>OPRM1</i>   |
| <i>PGLYRP4</i> | <i>ICMT</i>    | <i>OR10H5</i>  |
| <i>PGM2</i>    | <i>ICOS</i>    | <i>OR13C3</i>  |
| <i>PGM2L1</i>  | <i>ICOSLG</i>  | <i>OR1L8</i>   |
| <i>PGPEP1</i>  | <i>ID3</i>     | <i>OR2A4</i>   |
| <i>PGPEP1L</i> | <i>ID4</i>     | <i>OR2B11</i>  |
| <i>PGR</i>     | <i>IDE</i>     | <i>OR51E1</i>  |
| <i>PHACTR2</i> | <i>IDH1</i>    | <i>OR7A5</i>   |
| <i>PHACTR4</i> | <i>IDH3A</i>   | <i>OR8J1</i>   |
| <i>PHAX</i>    | <i>IDI1</i>    | <i>ORAI2</i>   |
| <i>PHC1</i>    | <i>IDI2</i>    | <i>ORAI3</i>   |
| <i>PHC2</i>    | <i>IDS</i>     | <i>ORM1</i>    |
| <i>PHC3</i>    | <i>IER3IP1</i> | <i>ORMDL2</i>  |
| <i>PHETA2</i>  | <i>IER5</i>    | <i>ORMDL3</i>  |
| <i>PHEX</i>    | <i>IER5L</i>   | <i>OSBP2</i>   |
| <i>PHF12</i>   | <i>IFI44L</i>  | <i>OSBPL10</i> |
| <i>PHF19</i>   | <i>IFIT1</i>   | <i>OSBPL2</i>  |
| <i>PHF20</i>   | <i>IFIT3</i>   | <i>OSBPL3</i>  |
| <i>PHF8</i>    | <i>IFIT5</i>   | <i>OSBPL6</i>  |
| <i>PHIP</i>    | <i>IFNA1</i>   | <i>OSBPL7</i>  |
| <i>PHKA2</i>   | <i>IFNA10</i>  | <i>OSBPL8</i>  |
| <i>PHKG2</i>   | <i>IFNA14</i>  | <i>OSGIN2</i>  |
| <i>PHLDB2</i>  | <i>IFNA16</i>  | <i>OSMR</i>    |
| <i>PHRF1</i>   | <i>IFNA17</i>  | <i>OSTM1</i>   |
| <i>PHYHIP</i>  | <i>IFNA2</i>   | <i>OTOGL</i>   |
| <i>PI15</i>    | <i>IFNA21</i>  | <i>OTUB2</i>   |
| <i>PI16</i>    | <i>IFNA4</i>   | <i>OTUD3</i>   |
| <i>PI4K2A</i>  | <i>IFNA6</i>   | <i>OTUD4</i>   |
| <i>PID1</i>    | <i>IFNA7</i>   | <i>OTUD6B</i>  |
| <i>PIGF</i>    | <i>IFNAR1</i>  | <i>OTULINL</i> |
| <i>PIGH</i>    | <i>IFNG</i>    | <i>OXA1L</i>   |
| <i>PIGK</i>    | <i>IFNGR1</i>  | <i>OXCT1</i>   |
| <i>PIGL</i>    | <i>IFNK</i>    | <i>OXNAD1</i>  |
| <i>PIGO</i>    | <i>IFRD1</i>   | <i>OXR1</i>    |
| <i>PIGP</i>    | <i>IFT122</i>  | <i>OXSR1</i>   |
| <i>PIGQ</i>    | <i>IFT22</i>   | <i>OXTR</i>    |
| <i>PIGT</i>    | <i>IFT57</i>   | <i>P2RX4</i>   |
| <i>PIH1D3</i>  | <i>IFT74</i>   | <i>P2RY1</i>   |
| <i>PIK3AP1</i> | <i>IFT80</i>   | <i>P2RY12</i>  |
| <i>PIK3C2A</i> | <i>IFT81</i>   | <i>P2RY14</i>  |
| <i>PIK3C2B</i> | <i>IFT88</i>   | <i>P2RY2</i>   |
| <i>PIK3CA</i>  | <i>IGDCC3</i>  | <i>P4HA2</i>   |

|                 |                 |                    |
|-----------------|-----------------|--------------------|
| <i>PIK3CG</i>   | <i>IGDCC4</i>   | <i>PABPC1</i>      |
| <i>PIK3R1</i>   | <i>IGF1</i>     | <i>PABPC3</i>      |
| <i>PIN4</i>     | <i>IGF1R</i>    | <i>PABPN1</i>      |
| <i>PIP4P1</i>   | <i>IGF2BP1</i>  | <i>PACRGL</i>      |
| <i>PIP4P2</i>   | <i>IGF2BP3</i>  | <i>PACS1</i>       |
| <i>PIP5K1A</i>  | <i>IGF2R</i>    | <i>PACS2</i>       |
| <i>PIRT</i>     | <i>IGFBP4</i>   | <i>PADI1</i>       |
| <i>PITPNA</i>   | <i>IGFBP5</i>   | <i>PADI2</i>       |
| <i>PITPNB</i>   | <i>IGSF10</i>   | <i>PAF1</i>        |
| <i>PITPNC1</i>  | <i>IGSF11</i>   | <i>PAFAH1B2</i>    |
| <i>PITPNM2</i>  | <i>IGSF3</i>    | <i>PAG1</i>        |
| <i>PIWIL1</i>   | <i>IGSF6</i>    | <i>PAGR1</i>       |
| <i>PIWIL2</i>   | <i>IKBIP</i>    | <i>PAH</i>         |
| <i>PKDCC</i>    | <i>IKZF1</i>    | <i>PAICS</i>       |
| <i>PKDREJ</i>   | <i>IKZF3</i>    | <i>PAIP1</i>       |
| <i>PKHD1</i>    | <i>IKZF5</i>    | <i>PAIP2</i>       |
| <i>PKHD1L1</i>  | <i>IL10RA</i>   | <i>PAIP2B</i>      |
| <i>PKIA</i>     | <i>IL11</i>     | <i>PAK1</i>        |
| <i>PKLR</i>     | <i>IL12RB2</i>  | <i>PAK1IP1</i>     |
| <i>PKM</i>      | <i>IL15RA</i>   | <i>PAK2</i>        |
| <i>PKNOX2</i>   | <i>IL16</i>     | <i>PAK3</i>        |
| <i>PKP1</i>     | <i>IL17A</i>    | <i>PALB2</i>       |
| <i>PKP2</i>     | <i>IL17RA</i>   | <i>PALLD</i>       |
| <i>PKP4</i>     | <i>IL17RB</i>   | <i>PALM2-AKAP2</i> |
| <i>PLA2G12A</i> | <i>IL17RD</i>   | <i>PANK1</i>       |
| <i>PLA2G2C</i>  | <i>IL17REL</i>  | <i>PANK3</i>       |
| <i>PLA2G4D</i>  | <i>IL18R1</i>   | <i>PANK4</i>       |
| <i>PLA2G7</i>   | <i>IL1A</i>     | <i>PAOX</i>        |
| <i>PLAAT3</i>   | <i>IL1F10</i>   | <i>PAPLN</i>       |
| <i>PLAAT5</i>   | <i>IL1R1</i>    | <i>PAPOLA</i>      |
| <i>PLAC8</i>    | <i>IL1RAP</i>   | <i>PAPOLG</i>      |
| <i>PLAG1</i>    | <i>IL1RAPL1</i> | <i>PAPPA2</i>      |
| <i>PLAGL1</i>   | <i>IL1RL1</i>   | <i>PAPSS1</i>      |
| <i>PLAUR</i>    | <i>IL1RN</i>    | <i>PAPSS2</i>      |
| <i>PLCB1</i>    | <i>IL22RA1</i>  | <i>PAQR3</i>       |
| <i>PLCB2</i>    | <i>IL22RA2</i>  | <i>PARD3</i>       |
| <i>PLCE1</i>    | <i>IL24</i>     | <i>PARD3B</i>      |
| <i>PLCG1</i>    | <i>IL2RB</i>    | <i>PARD6G-AS1</i>  |
| <i>PLCH2</i>    | <i>IL3</i>      | <i>PARL</i>        |
| <i>PLCL1</i>    | <i>IL31RA</i>   | <i>PARP14</i>      |
| <i>PLCXD1</i>   | <i>IL33</i>     | <i>PARP15</i>      |
| <i>PLCXD3</i>   | <i>IL3RA</i>    | <i>PARP4</i>       |
| <i>PLD5</i>     | <i>IL5</i>      | <i>PARP9</i>       |
| <i>PLEKHA3</i>  | <i>IL5RA</i>    | <i>PARVA</i>       |

|                 |                |                 |
|-----------------|----------------|-----------------|
| <i>PLEKHA5</i>  | <i>IL6</i>     | <i>PARVB</i>    |
| <i>PLEKHA6</i>  | <i>IL6ST</i>   | <i>PARVG</i>    |
| <i>PLEKHA8</i>  | <i>IL7</i>     | <i>PATE2</i>    |
| <i>PLEKHB1</i>  | <i>ILDR2</i>   | <i>PATL1</i>    |
| <i>PLEKHB2</i>  | <i>ILF2</i>    | <i>PATZ1</i>    |
| <i>PLEKHF1</i>  | <i>ILF3</i>    | <i>PAWR</i>     |
| <i>PLEKHG4B</i> | <i>ILVBL</i>   | <i>PAX1</i>     |
| <i>PLEKHH2</i>  | <i>IMMP2L</i>  | <i>PAX3</i>     |
| <i>PLEKHM1</i>  | <i>IMP4</i>    | <i>PAX5</i>     |
| <i>PLEKHM2</i>  | <i>IMPA1</i>   | <i>PAX6</i>     |
| <i>PLEKHM3</i>  | <i>IMPA2</i>   | <i>PAX7</i>     |
| <i>PLEKHO1</i>  | <i>IMPACT</i>  | <i>PAX8</i>     |
| <i>PLIN3</i>    | <i>IMPAD1</i>  | <i>PAXBP1</i>   |
| <i>PLPP3</i>    | <i>IMPG1</i>   | <i>PBRM1</i>    |
| <i>PLPP4</i>    | <i>IMPG2</i>   | <i>PBX1</i>     |
| <i>PLPPR1</i>   | <i>INA</i>     | <i>PBX3</i>     |
| <i>PLRG1</i>    | <i>INCENP</i>  | <i>PBXIP1</i>   |
| <i>PLS1</i>     | <i>INF2</i>    | <i>PCARE</i>    |
| <i>PLSCR1</i>   | <i>ING1</i>    | <i>PCDH10</i>   |
| <i>PLSCR4</i>   | <i>ING2</i>    | <i>PCDH11X</i>  |
| <i>PLXDC1</i>   | <i>ING3</i>    | <i>PCDH15</i>   |
| <i>PLXDC2</i>   | <i>ING4</i>    | <i>PCDH19</i>   |
| <i>PLXNA2</i>   | <i>INHBA</i>   | <i>PCDH20</i>   |
| <i>PLXNA3</i>   | <i>INHBB</i>   | <i>PCDH7</i>    |
| <i>PLXNB2</i>   | <i>INIP</i>    | <i>PCDH9</i>    |
| <i>PLXNC1</i>   | <i>INKA2</i>   | <i>PCDHA1</i>   |
| <i>PLXND1</i>   | <i>INMT</i>    | <i>PCDHA10</i>  |
| <i>PM20D2</i>   | <i>INO80D</i>  | <i>PCDHA11</i>  |
| <i>PMEPA1</i>   | <i>INPP1</i>   | <i>PCDHA12</i>  |
| <i>PML</i>      | <i>INPP4A</i>  | <i>PCDHA13</i>  |
| <i>PNKD</i>     | <i>INPP4B</i>  | <i>PCDHA2</i>   |
| <i>PNMA8B</i>   | <i>INSC</i>    | <i>PCDHA3</i>   |
| <i>PNN</i>      | <i>INSIG1</i>  | <i>PCDHA4</i>   |
| <i>PNO1</i>     | <i>INSIG2</i>  | <i>PCDHA5</i>   |
| <i>PNP</i>      | <i>INSL5</i>   | <i>PCDHA6</i>   |
| <i>PNPLA3</i>   | <i>INSM1</i>   | <i>PCDHA7</i>   |
| <i>PNPLA4</i>   | <i>INSM2</i>   | <i>PCDHA8</i>   |
| <i>PNPLA8</i>   | <i>INSR</i>    | <i>PCDHA9</i>   |
| <i>PNRC2</i>    | <i>INSYN2A</i> | <i>PCDHAC1</i>  |
| <i>POC1A</i>    | <i>INSYN2B</i> | <i>PCDHAC2</i>  |
| <i>POC1B</i>    | <i>INTS12</i>  | <i>PCDHB5</i>   |
| <i>POC5</i>     | <i>INTS13</i>  | <i>PCDHGA1</i>  |
| <i>POF1B</i>    | <i>INTS14</i>  | <i>PCDHGA10</i> |
| <i>POFUT1</i>   | <i>INTS2</i>   | <i>PCDHGA11</i> |

|             |              |          |
|-------------|--------------|----------|
| POGZ        | INTS3        | PCDHGA12 |
| POLA2       | INTS6        | PCDHGA2  |
| POLD2       | INTS7        | PCDHGA3  |
| POLD4       | INTS8        | PCDHGA4  |
| POLDIP3     | INTU         | PCDHGA5  |
| POLE        | INVS         | PCDHGA6  |
| POLH        | IP6K1        | PCDHGA7  |
| POLR1A      | IPCEF1       | PCDHGA8  |
| POLR1D      | IPMK         | PCDHGA9  |
| POLR1E      | IPO11-LRRC70 | PCDHGB1  |
| POLR2G      | IPO5         | PCDHGB2  |
| POLR2H      | IPO7         | PCDHGB3  |
| POLR3E      | IPO8         | PCDHGB4  |
| POLR3F      | IPO9         | PCDHGB6  |
| POLR3H      | IPP          | PCDHGB7  |
| POM121      | IPPK         | PCDHGC3  |
| POMGNT1     | IQCB1        | PCDHGC4  |
| POMGNT2     | IQCE         | PCDHGC5  |
| POMT2       | IQCG         | PCF11    |
| POP1        | IQCH         | PCGF3    |
| POP4        | IQCJ         | PCLAF    |
| POPDC2      | IQGAP1       | PCNX1    |
| POT1        | IQGAP3       | PCSK1    |
| POU2F1      | IQSEC2       | PCSK7    |
| POU3F2      | IRAK1BP1     | PCSK9    |
| POU3F3      | IRAK2        | PCYOX1   |
| POU4F2      | IRAK3        | PCYT1B   |
| PPAN-P2RY11 | IRAK4        | PCYT2    |
| PPARGC1A    | IREB2        | PDAP1    |
| PPARGC1B    | IRF1         | PDCD10   |
| PPCDC       | IRF2BP2      | PDCD2    |
| PPDPF       | IRF2BPL      | PDCD6IP  |
| PPDPFL      | IRF4         | PDCD7    |
| PPFIA1      | IRF8         | PDCL     |
| PPFIBP1     | IRGQ         | PDE10A   |
| PPFIBP2     | IRS1         | PDE11A   |
| PPIA        | IRS2         | PDE1C    |
| PPIAL4D     | IRS4         | PDE3A    |
| PPIAL4G     | IRX1         | PDE4A    |
| PPIE        | IRX4         | PDE4B    |
| PPIG        | ISCA1        | PDE4D    |
| PPIL1       | ISCA2        | PDE4DIP  |
| PPIL2       | ISG20L2      | PDE5A    |
| PPIL6       | ISL1         | PDE6B    |

|                 |                   |               |
|-----------------|-------------------|---------------|
| <i>PPIP5K2</i>  | <i>ISL2</i>       | <i>PDE7A</i>  |
| <i>PPM1B</i>    | <i>ISLR2</i>      | <i>PDE7B</i>  |
| <i>PPM1E</i>    | <i>ISM1</i>       | <i>PDF</i>    |
| <i>PPM1F</i>    | <i>IST1</i>       | <i>PDGFA</i>  |
| <i>PPM1H</i>    | <i>ISY1-RAB43</i> | <i>PDGFD</i>  |
| <i>PPM1L</i>    | <i>ITCH</i>       | <i>PDGFRB</i> |
| <i>PPME1</i>    | <i>ITGA1</i>      | <i>PDHA1</i>  |
| <i>PPP1R12A</i> | <i>ITGA11</i>     | <i>PDIA6</i>  |
| <i>PPP1R12B</i> | <i>ITGA2</i>      | <i>PDIK1L</i> |
| <i>PPP1R13B</i> | <i>ITGA4</i>      | <i>PDK1</i>   |
| <i>PPP1R14C</i> | <i>ITGA8</i>      | <i>PDLIM2</i> |
| <i>PPP1R15A</i> | <i>ITGA9</i>      | <i>PDLIM5</i> |
| <i>PPP1R15B</i> | <i>ITGAL</i>      | <i>PDP1</i>   |
| <i>PPP1R1A</i>  | <i>ITGAV</i>      | <i>PDP2</i>   |
| <i>PPP1R26</i>  | <i>ITGB1BP1</i>   | <i>PDPK1</i>  |
| <i>PPP1R3D</i>  | <i>ITGB3BP</i>    | <i>PDPR</i>   |
| <i>PPP1R3G</i>  | <i>ITGB6</i>      | <i>PDS5A</i>  |
| <i>PPP1R7</i>   | <i>ITGB8</i>      | <i>PDS5B</i>  |
| <i>PPP1R8</i>   | <i>ITGBL1</i>     | <i>PDXDC1</i> |
| <i>PPP1R9A</i>  | <i>ITIH2</i>      | <i>PDZD2</i>  |
| <i>PPP2R1A</i>  | <i>ITK</i>        | <i>PEG10</i>  |
| <i>PPP2R1B</i>  | <i>ITM2B</i>      | <i>PELI1</i>  |
| <i>PPP2R2A</i>  | <i>ITPA</i>       | <i>PELI2</i>  |
| <i>PPP2R5E</i>  | <i>ITPK1</i>      | <i>PELO</i>   |
| <i>PPP3CB</i>   | <i>ITPKB</i>      | <i>PER1</i>   |
| <i>PPP3CC</i>   | <i>ITPR1</i>      | <i>PER2</i>   |
| <i>PPP3R1</i>   | <i>ITPR2</i>      | <i>PERP</i>   |
| <i>PPP3R2</i>   | <i>ITPRID1</i>    | <i>PES1</i>   |
| <i>PPP4R2</i>   | <i>ITPRIP</i>     | <i>PEX1</i>   |
| <i>PPP5C</i>    | <i>ITPRIPL2</i>   | <i>PEX11A</i> |
| <i>PPP5D1</i>   | <i>ITSN1</i>      | <i>PEX11B</i> |
| <i>PPP6C</i>    | <i>IVNS1ABP</i>   | <i>PEX13</i>  |
| <i>PPRC1</i>    | <i>IWS1</i>       | <i>PEX19</i>  |
| <i>PPTC7</i>    | <i>IYD</i>        | <i>PEX2</i>   |
| <i>PQLC1</i>    | <i>JADE1</i>      | <i>PEX26</i>  |
| <i>PQLC2L</i>   | <i>JADE2</i>      | <i>PEX3</i>   |
| <i>PQLC3</i>    | <i>JAGN1</i>      | <i>PEX5L</i>  |
| <i>PRAC1</i>    | <i>JAK1</i>       | <i>PFAS</i>   |
| <i>PRC1</i>     | <i>JAK2</i>       | <i>PFDN2</i>  |
| <i>PRDM1</i>    | <i>JAKMIP1</i>    | <i>PFDN6</i>  |
| <i>PRDM10</i>   | <i>JAKMIP2</i>    | <i>PFKFB2</i> |
| <i>PRDM16</i>   | <i>JAKMIP3</i>    | <i>PFKFB3</i> |
| <i>PRDM2</i>    | <i>JAM2</i>       | <i>PFKFB4</i> |
| <i>PRDM5</i>    | <i>JAM3</i>       | <i>PFN2</i>   |

|                 |                |                |
|-----------------|----------------|----------------|
| <i>PRDM6</i>    | <i>JAML</i>    | <i>PGAM1</i>   |
| <i>PRDM7</i>    | <i>JARID2</i>  | <i>PGAM4</i>   |
| <i>PRDM9</i>    | <i>JAZF1</i>   | <i>PGAP1</i>   |
| <i>PRDX4</i>    | <i>JCAD</i>    | <i>PGAP3</i>   |
| <i>PRDX6</i>    | <i>JDP2</i>    | <i>PGBD1</i>   |
| <i>PRELID2</i>  | <i>JHY</i>     | <i>PGBD3</i>   |
| <i>PRELID3B</i> | <i>JMJD6</i>   | <i>PGBD4</i>   |
| <i>PRELP</i>    | <i>JMY</i>     | <i>PGGHG</i>   |
| <i>PREX2</i>    | <i>JOSD1</i>   | <i>PGGT1B</i>  |
| <i>PRICKLE2</i> | <i>JPH1</i>    | <i>PGK1</i>    |
| <i>PRICKLE4</i> | <i>JPH4</i>    | <i>PGLYRP1</i> |
| <i>PRKAA2</i>   | <i>JTB</i>     | <i>PGLYRP4</i> |
| <i>PRKAB2</i>   | <i>JUN</i>     | <i>PGM2</i>    |
| <i>PRKACB</i>   | <i>KALRN</i>   | <i>PGM2L1</i>  |
| <i>PRKAR1A</i>  | <i>KANK2</i>   | <i>PGM3</i>    |
| <i>PRKAR2A</i>  | <i>KANK3</i>   | <i>PGPEP1</i>  |
| <i>PRKCB</i>    | <i>KANSL3</i>  | <i>PGPEP1L</i> |
| <i>PRKCH</i>    | <i>KARS</i>    | <i>PGR</i>     |
| <i>PRKCQ</i>    | <i>KAT14</i>   | <i>PHACTR2</i> |
| <i>PRKD1</i>    | <i>KAT2B</i>   | <i>PHACTR4</i> |
| <i>PRKG1</i>    | <i>KAT6A</i>   | <i>PHAX</i>    |
| <i>PRKN</i>     | <i>KAT6B</i>   | <i>PHC1</i>    |
| <i>PRKRA</i>    | <i>KAT7</i>    | <i>PHC2</i>    |
| <i>PRKX</i>     | <i>KAT8</i>    | <i>PHC3</i>    |
| <i>PRMT2</i>    | <i>KATNAL1</i> | <i>PHETA2</i>  |
| <i>PRMT3</i>    | <i>KATNAL2</i> | <i>PHEX</i>    |
| <i>PRMT6</i>    | <i>KATNBL1</i> | <i>PHF12</i>   |
| <i>PRMT9</i>    | <i>KAZALD1</i> | <i>PHF13</i>   |
| <i>PROB1</i>    | <i>KBTBD11</i> | <i>PHF19</i>   |
| <i>PROM1</i>    | <i>KBTBD12</i> | <i>PHF20</i>   |
| <i>PROM2</i>    | <i>KBTBD3</i>  | <i>PHF21A</i>  |
| <i>PROSER3</i>  | <i>KBTBD6</i>  | <i>PHF7</i>    |
| <i>PROX1</i>    | <i>KBTBD7</i>  | <i>PHF8</i>    |
| <i>PRPF38A</i>  | <i>KCMF1</i>   | <i>PHIP</i>    |
| <i>PRPF39</i>   | <i>KCNA1</i>   | <i>PHKA2</i>   |
| <i>PRPF4B</i>   | <i>KCNA2</i>   | <i>PHKG2</i>   |
| <i>PRPS1</i>    | <i>KCNA3</i>   | <i>PHLDB2</i>  |
| <i>PRPS1L1</i>  | <i>KCNAB1</i>  | <i>PHTF2</i>   |
| <i>PRR14L</i>   | <i>KCNB1</i>   | <i>PHYHIP</i>  |
| <i>PRR15</i>    | <i>KCNC1</i>   | <i>PI15</i>    |
| <i>PRR29</i>    | <i>KCNC2</i>   | <i>PI16</i>    |
| <i>PRR3</i>     | <i>KCND2</i>   | <i>PI4K2A</i>  |
| <i>PRR5L</i>    | <i>KCNE1</i>   | <i>PIGF</i>    |
| <i>PRRC1</i>    | <i>KCNE2</i>   | <i>PIGK</i>    |

|               |               |                 |
|---------------|---------------|-----------------|
| <i>PRRC2A</i> | <i>KCNE4</i>  | <i>PIGL</i>     |
| <i>PRRG1</i>  | <i>KCNG3</i>  | <i>PIGO</i>     |
| <i>PRRG4</i>  | <i>KCNG4</i>  | <i>PIGP</i>     |
| <i>PRRT1</i>  | <i>KCNH1</i>  | <i>PIGT</i>     |
| <i>PRRX1</i>  | <i>KCNH5</i>  | <i>PIK3C2B</i>  |
| <i>PRSS12</i> | <i>KCNH6</i>  | <i>PIK3CA</i>   |
| <i>PRSS23</i> | <i>KCNH8</i>  | <i>PIK3CG</i>   |
| <i>PRSS36</i> | <i>KCNIP2</i> | <i>PIK3R1</i>   |
| <i>PRSS37</i> | <i>KCNIP3</i> | <i>PIK3R3</i>   |
| <i>PRSS8</i>  | <i>KCNIP4</i> | <i>PIMREG</i>   |
| <i>PRTG</i>   | <i>KCNJ1</i>  | <i>PIN1</i>     |
| <i>PRUNE1</i> | <i>KCNJ13</i> | <i>PIN4</i>     |
| <i>PRXL2A</i> | <i>KCNJ15</i> | <i>PIP4P1</i>   |
| <i>PSAP</i>   | <i>KCNJ2</i>  | <i>PIP4P2</i>   |
| <i>PSD2</i>   | <i>KCNJ3</i>  | <i>PIRT</i>     |
| <i>PSD3</i>   | <i>KCNJ5</i>  | <i>PITHD1</i>   |
| <i>PSD4</i>   | <i>KCNJ6</i>  | <i>PITPNA</i>   |
| <i>PSEN1</i>  | <i>KCNJ8</i>  | <i>PITPNB</i>   |
| <i>PSIP1</i>  | <i>KCNJ9</i>  | <i>PITPNC1</i>  |
| <i>PSMA4</i>  | <i>KCNK1</i>  | <i>PITPNM1</i>  |
| <i>PSMB1</i>  | <i>KCNK10</i> | <i>PITPNM2</i>  |
| <i>PSMB11</i> | <i>KCNK12</i> | <i>PIWIL1</i>   |
| <i>PSMB5</i>  | <i>KCNK13</i> | <i>PKD2</i>     |
| <i>PSMB7</i>  | <i>KCNK15</i> | <i>PKDCC</i>    |
| <i>PSMC4</i>  | <i>KCNK5</i>  | <i>PKDREJ</i>   |
| <i>PSMD11</i> | <i>KCNK6</i>  | <i>PKHD1</i>    |
| <i>PSME3</i>  | <i>KCNK9</i>  | <i>PKHD1L1</i>  |
| <i>PSMF1</i>  | <i>KCNMA1</i> | <i>PKIA</i>     |
| <i>PSPH</i>   | <i>KCNMB1</i> | <i>PKLR</i>     |
| <i>PTAFR</i>  | <i>KCNMB2</i> | <i>PKM</i>      |
| <i>PTAR1</i>  | <i>KCNMB3</i> | <i>PKNOX1</i>   |
| <i>PTBP2</i>  | <i>KCNMB4</i> | <i>PKNOX2</i>   |
| <i>PTBP3</i>  | <i>KCNN2</i>  | <i>PKP1</i>     |
| <i>PTCD2</i>  | <i>KCNN3</i>  | <i>PKP4</i>     |
| <i>PTCD3</i>  | <i>KCNQ3</i>  | <i>PLA2G12A</i> |
| <i>PTCHD1</i> | <i>KCNQ5</i>  | <i>PLA2G2C</i>  |
| <i>PTCHD4</i> | <i>KCNS2</i>  | <i>PLA2G4A</i>  |
| <i>PTDSS1</i> | <i>KCNT2</i>  | <i>PLA2G4D</i>  |
| <i>PTDSS2</i> | <i>KCNV1</i>  | <i>PLA2G7</i>   |
| <i>PTEN</i>   | <i>KCTD10</i> | <i>PLA2R1</i>   |
| <i>PTGER2</i> | <i>KCTD12</i> | <i>PLAAT3</i>   |
| <i>PTGFR</i>  | <i>KCTD14</i> | <i>PLAAT5</i>   |
| <i>PTGIS</i>  | <i>KCTD15</i> | <i>PLAC8</i>    |
| <i>PTGS1</i>  | <i>KCTD16</i> | <i>PLAG1</i>    |

|                |                  |                 |
|----------------|------------------|-----------------|
| <i>PTH2R</i>   | <i>KCTD3</i>     | <i>PLAUR</i>    |
| <i>PTHLH</i>   | <i>KCTD7</i>     | <i>PLCB1</i>    |
| <i>PTK2</i>    | <i>KCTD8</i>     | <i>PLCE1</i>    |
| <i>PTPA</i>    | <i>KCTD9</i>     | <i>PLCG1</i>    |
| <i>PTPMT1</i>  | <i>KDELRL1</i>   | <i>PLCH2</i>    |
| <i>PTPN1</i>   | <i>KDELRL3</i>   | <i>PLCL1</i>    |
| <i>PTPN11</i>  | <i>KDF1</i>      | <i>PLCXD1</i>   |
| <i>PTPN14</i>  | <i>KDM2A</i>     | <i>PLCXD3</i>   |
| <i>PTPN18</i>  | <i>KDM2B</i>     | <i>PLD5</i>     |
| <i>PTPN3</i>   | <i>KDM3B</i>     | <i>PLEKHA3</i>  |
| <i>PTPN4</i>   | <i>KDM4C</i>     | <i>PLEKHA5</i>  |
| <i>PTPRJ</i>   | <i>KDM5A</i>     | <i>PLEKHA6</i>  |
| <i>PTPRK</i>   | <i>KDM5B</i>     | <i>PLEKHA8</i>  |
| <i>PTPRM</i>   | <i>KDM5C</i>     | <i>PLEKHB1</i>  |
| <i>PTPRN</i>   | <i>KDM5D</i>     | <i>PLEKHB2</i>  |
| <i>PTPRO</i>   | <i>KDM6A</i>     | <i>PLEKHF1</i>  |
| <i>PTPRR</i>   | <i>KDM7A</i>     | <i>PLEKHG4B</i> |
| <i>PTPRT</i>   | <i>KERA</i>      | <i>PLEKHH2</i>  |
| <i>PTPRZ1</i>  | <i>KHDC4</i>     | <i>PLEKHM2</i>  |
| <i>PTRH2</i>   | <i>KHDRBS1</i>   | <i>PLEKHM3</i>  |
| <i>PUM3</i>    | <i>KIAA0040</i>  | <i>PLEKHO1</i>  |
| <i>PURA</i>    | <i>KIAA0087</i>  | <i>PLEKHS1</i>  |
| <i>PURB</i>    | <i>KIAA0232</i>  | <i>PLIN3</i>    |
| <i>PURG</i>    | <i>KIAA0319</i>  | <i>PLOD2</i>    |
| <i>PUS7</i>    | <i>KIAA0355</i>  | <i>PLP2</i>     |
| <i>PVR</i>     | <i>KIAA0408</i>  | <i>PLPP3</i>    |
| <i>PWP1</i>    | <i>KIAA0513</i>  | <i>PLPP4</i>    |
| <i>PWP2</i>    | <i>KIAA0586</i>  | <i>PLPPR1</i>   |
| <i>PWWP2A</i>  | <i>KIAA0753</i>  | <i>PLRG1</i>    |
| <i>PXDN</i>    | <i>KIAA0825</i>  | <i>PLS1</i>     |
| <i>PXK</i>     | <i>KIAA0895</i>  | <i>PLSCR1</i>   |
| <i>PXMP4</i>   | <i>KIAA0930</i>  | <i>PLSCR4</i>   |
| <i>PXN</i>     | <i>KIAA1143</i>  | <i>PLXDC1</i>   |
| <i>PXYLP1</i>  | <i>KIAA1147</i>  | <i>PLXDC2</i>   |
| <i>PYCR1</i>   | <i>KIAA1211</i>  | <i>PLXNA2</i>   |
| <i>PYGB</i>    | <i>KIAA1217</i>  | <i>PLXNA3</i>   |
| <i>PYGO1</i>   | <i>KIAA1257</i>  | <i>PLXNB2</i>   |
| <i>PYROXD1</i> | <i>KIAA1324</i>  | <i>PLXNC1</i>   |
| <i>QKI</i>     | <i>KIAA1324L</i> | <i>PLXND1</i>   |
| <i>QPR1</i>    | <i>KIAA1328</i>  | <i>PM20D2</i>   |
| <i>QSER1</i>   | <i>KIAA1549</i>  | <i>PMEPA1</i>   |
| <i>QSOX1</i>   | <i>KIAA1549L</i> | <i>PML</i>      |
| <i>QSOX2</i>   | <i>KIAA1586</i>  | <i>PMPCA</i>    |
| <i>R3HCC1</i>  | <i>KIAA1614</i>  | <i>PNISR</i>    |



|                  |                  |                    |
|------------------|------------------|--------------------|
| <i>RAB11B</i>    | <i>KIAA1841</i>  | <i>PNKD</i>        |
| <i>RAB11FIP1</i> | <i>KIAA1958</i>  | <i>PNN</i>         |
| <i>RAB11FIP2</i> | <i>KIAA2026</i>  | <i>PNO1</i>        |
| <i>RAB11FIP5</i> | <i>KIDINS220</i> | <i>PNP</i>         |
| <i>RAB14</i>     | <i>KIF11</i>     | <i>PNPLA1</i>      |
| <i>RAB15</i>     | <i>KIF13A</i>    | <i>PNPLA3</i>      |
| <i>RAB18</i>     | <i>KIF14</i>     | <i>PNPLA4</i>      |
| <i>RAB1A</i>     | <i>KIF16B</i>    | <i>PNPLA8</i>      |
| <i>RAB1B</i>     | <i>KIF18A</i>    | <i>PNRC2</i>       |
| <i>RAB22A</i>    | <i>KIF1A</i>     | <i>POC1A</i>       |
| <i>RAB23</i>     | <i>KIF1B</i>     | <i>POF1B</i>       |
| <i>RAB27A</i>    | <i>KIF1BP</i>    | <i>POFUT1</i>      |
| <i>RAB27B</i>    | <i>KIF1C</i>     | <i>POFUT2</i>      |
| <i>RAB30</i>     | <i>KIF21A</i>    | <i>POGLUT3</i>     |
| <i>RAB31</i>     | <i>KIF23</i>     | <i>POGZ</i>        |
| <i>RAB32</i>     | <i>KIF27</i>     | <i>POLA2</i>       |
| <i>RAB33B</i>    | <i>KIF2A</i>     | <i>POLD3</i>       |
| <i>RAB36</i>     | <i>KIF3A</i>     | <i>POLDIP3</i>     |
| <i>RAB38</i>     | <i>KIF3B</i>     | <i>POLG</i>        |
| <i>RAB39B</i>    | <i>KIF3C</i>     | <i>POLH</i>        |
| <i>RAB3A</i>     | <i>KIF4A</i>     | <i>POLQ</i>        |
| <i>RAB3B</i>     | <i>KIF4B</i>     | <i>POLR1A</i>      |
| <i>RAB3C</i>     | <i>KIF5A</i>     | <i>POLR1D</i>      |
| <i>RAB3D</i>     | <i>KIF5B</i>     | <i>POLR1E</i>      |
| <i>RAB3GAP1</i>  | <i>KIF5C</i>     | <i>POLR2G</i>      |
| <i>RAB3GAP2</i>  | <i>KIFAP3</i>    | <i>POLR2H</i>      |
| <i>RAB40B</i>    | <i>KIN</i>       | <i>POLR3E</i>      |
| <i>RAB42</i>     | <i>KIR2DL1</i>   | <i>POLR3F</i>      |
| <i>RAB43</i>     | <i>KIR2DL3</i>   | <i>POLR3H</i>      |
| <i>RAB4A</i>     | <i>KIR2DL4</i>   | <i>POM121</i>      |
| <i>RAB5B</i>     | <i>KIR3DL1</i>   | <i>POMGNT2</i>     |
| <i>RAB7A</i>     | <i>KIR3DL2</i>   | <i>POMP</i>        |
| <i>RAB9B</i>     | <i>KIR3DL3</i>   | <i>POMT2</i>       |
| <i>RABGAP1</i>   | <i>KIRREL2</i>   | <i>POP1</i>        |
| <i>RABIF</i>     | <i>KIT</i>       | <i>POP4</i>        |
| <i>RABL2B</i>    | <i>KL</i>        | <i>POPDC2</i>      |
| <i>RABL6</i>     | <i>KLC1</i>      | <i>POT1</i>        |
| <i>RAD1</i>      | <i>KLC4</i>      | <i>POU2F1</i>      |
| <i>RAD23B</i>    | <i>KLF10</i>     | <i>POU3F2</i>      |
| <i>RAD50</i>     | <i>KLF12</i>     | <i>POU3F3</i>      |
| <i>RAD51</i>     | <i>KLF13</i>     | <i>POU4F2</i>      |
| <i>RAD51C</i>    | <i>KLF15</i>     | <i>PP7080</i>      |
| <i>RAD52</i>     | <i>KLF17</i>     | <i>PPAN-P2RY11</i> |
| <i>RAD54L</i>    | <i>KLF2</i>      | <i>PPARGC1A</i>    |

|                 |                |                 |
|-----------------|----------------|-----------------|
| <i>RAD9B</i>    | <i>KLF3</i>    | <i>PPARGC1B</i> |
| <i>RADX</i>     | <i>KLF5</i>    | <i>PPDPFL</i>   |
| <i>RAG1</i>     | <i>KLF6</i>    | <i>PPFIBP1</i>  |
| <i>RAI14</i>    | <i>KLF7</i>    | <i>PPFIBP2</i>  |
| <i>RALA</i>     | <i>KLF8</i>    | <i>PPIA</i>     |
| <i>RALGAPA1</i> | <i>KLF9</i>    | <i>PPIAL4D</i>  |
| <i>RALGPS1</i>  | <i>KLHDC1</i>  | <i>PPIAL4G</i>  |
| <i>RALY</i>     | <i>KLHDC10</i> | <i>PPIE</i>     |
| <i>RAN</i>      | <i>KLHDC8A</i> | <i>PPIG</i>     |
| <i>RANBP10</i>  | <i>KLHDC9</i>  | <i>PPIL1</i>    |
| <i>RANBP17</i>  | <i>KLHL1</i>   | <i>PPIL6</i>    |
| <i>RANBP2</i>   | <i>KLHL11</i>  | <i>PPIP5K2</i>  |
| <i>RANBP3L</i>  | <i>KLHL14</i>  | <i>PPM1A</i>    |
| <i>RANBP6</i>   | <i>KLHL15</i>  | <i>PPM1B</i>    |
| <i>RANGAP1</i>  | <i>KLHL18</i>  | <i>PPM1E</i>    |
| <i>RAP1A</i>    | <i>KLHL20</i>  | <i>PPM1F</i>    |
| <i>RAP1B</i>    | <i>KLHL21</i>  | <i>PPM1H</i>    |
| <i>RAP1GAP2</i> | <i>KLHL23</i>  | <i>PPM1L</i>    |
| <i>RAP2A</i>    | <i>KLHL24</i>  | <i>PPME1</i>    |
| <i>RAP2B</i>    | <i>KLHL28</i>  | <i>PPP1R12A</i> |
| <i>RAPGEF1</i>  | <i>KLHL3</i>   | <i>PPP1R12B</i> |
| <i>RAPGEF2</i>  | <i>KLHL30</i>  | <i>PPP1R13B</i> |
| <i>RAPGEF3</i>  | <i>KLHL31</i>  | <i>PPP1R14C</i> |
| <i>RAPGEF5</i>  | <i>KLHL36</i>  | <i>PPP1R15A</i> |
| <i>RAPGEF6</i>  | <i>KLHL38</i>  | <i>PPP1R15B</i> |
| <i>RAPH1</i>    | <i>KLHL4</i>   | <i>PPP1R1A</i>  |
| <i>RASA2</i>    | <i>KLHL41</i>  | <i>PPP1R26</i>  |
| <i>RASA4</i>    | <i>KLHL42</i>  | <i>PPP1R3D</i>  |
| <i>RASA4B</i>   | <i>KLHL5</i>   | <i>PPP1R3G</i>  |
| <i>RASEF</i>    | <i>KLHL6</i>   | <i>PPP1R7</i>   |
| <i>RASGRF2</i>  | <i>KLHL7</i>   | <i>PPP1R8</i>   |
| <i>RASGRP1</i>  | <i>KLHL8</i>   | <i>PPP1R9A</i>  |
| <i>RASSF1</i>   | <i>KLHL9</i>   | <i>PPP2R1A</i>  |
| <i>RASSF2</i>   | <i>KLK13</i>   | <i>PPP2R1B</i>  |
| <i>RASSF3</i>   | <i>KLK3</i>    | <i>PPP2R2A</i>  |
| <i>RASSF6</i>   | <i>KLLN</i>    | <i>PPP2R2B</i>  |
| <i>RASSF8</i>   | <i>KLRB1</i>   | <i>PPP2R5C</i>  |
| <i>RASSF9</i>   | <i>KLRC1</i>   | <i>PPP2R5D</i>  |
| <i>RB1</i>      | <i>KLRC2</i>   | <i>PPP2R5E</i>  |
| <i>RBAK</i>     | <i>KLRC3</i>   | <i>PPP3CB</i>   |
| <i>RBBP7</i>    | <i>KLRC4</i>   | <i>PPP3CC</i>   |
| <i>RBCK1</i>    | <i>KLRD1</i>   | <i>PPP3R1</i>   |
| <i>RBFOX1</i>   | <i>KLRG1</i>   | <i>PPP3R2</i>   |
| <i>RBFOX2</i>   | <i>KLRG2</i>   | <i>PPP4R2</i>   |

|                   |                  |                 |
|-------------------|------------------|-----------------|
| <i>RBM10</i>      | <i>KLRK1</i>     | <i>PPP5C</i>    |
| <i>RBM14</i>      | <i>KMO</i>       | <i>PPP5D1</i>   |
| <i>RBM14-RBM4</i> | <i>KMT2A</i>     | <i>PPP6C</i>    |
| <i>RBM15B</i>     | <i>KMT2C</i>     | <i>PPTC7</i>    |
| <i>RBM18</i>      | <i>KMT5B</i>     | <i>PPWD1</i>    |
| <i>RBM24</i>      | <i>KNG1</i>      | <i>PQLC1</i>    |
| <i>RBM27</i>      | <i>KNL1</i>      | <i>PQLC2L</i>   |
| <i>RBM28</i>      | <i>KNSTRN</i>    | <i>PQLC3</i>    |
| <i>RBM4</i>       | <i>KNTC1</i>     | <i>PRAC1</i>    |
| <i>RBM45</i>      | <i>KPNA1</i>     | <i>PRC1</i>     |
| <i>RBM48</i>      | <i>KPNA3</i>     | <i>PRDM1</i>    |
| <i>RBM4B</i>      | <i>KPNA4</i>     | <i>PRDM10</i>   |
| <i>RBM5</i>       | <i>KPNA5</i>     | <i>PRDM16</i>   |
| <i>RBM7</i>       | <i>KPNA6</i>     | <i>PRDM2</i>    |
| <i>RBMS1</i>      | <i>KPNB1</i>     | <i>PRDM5</i>    |
| <i>RBMS2</i>      | <i>KRAS</i>      | <i>PRDM6</i>    |
| <i>RBMX2</i>      | <i>KRBOX4</i>    | <i>PRDM7</i>    |
| <i>RBMXL1</i>     | <i>KREMEN1</i>   | <i>PRDM9</i>    |
| <i>RBP2</i>       | <i>KRIT1</i>     | <i>PRDX2</i>    |
| <i>BPMS</i>       | <i>KRR1</i>      | <i>PRDX6</i>    |
| <i>BPMS2</i>      | <i>KRT1</i>      | <i>PRELID2</i>  |
| <i>RBSN</i>       | <i>KRT10</i>     | <i>PRELID3B</i> |
| <i>RBX1</i>       | <i>KRT15</i>     | <i>PREX2</i>    |
| <i>RCAN3</i>      | <i>KRT19</i>     | <i>PRICKLE2</i> |
| <i>RCC2</i>       | <i>KRT2</i>      | <i>PRKAA2</i>   |
| <i>RCCD1</i>      | <i>KRT20</i>     | <i>PRKAB2</i>   |
| <i>RCL1</i>       | <i>KRT222</i>    | <i>PRKACB</i>   |
| <i>RCN2</i>       | <i>KRT24</i>     | <i>PRKAG2</i>   |
| <i>RCOR1</i>      | <i>KRT26</i>     | <i>PRKAR1A</i>  |
| <i>RCSD1</i>      | <i>KRT3</i>      | <i>PRKAR2A</i>  |
| <i>RCVRN</i>      | <i>KRT35</i>     | <i>PRKAR2B</i>  |
| <i>RD3</i>        | <i>KRT6A</i>     | <i>PRKCA</i>    |
| <i>RD3L</i>       | <i>KRT6C</i>     | <i>PRKCB</i>    |
| <i>RDH13</i>      | <i>KRT77</i>     | <i>PRKCH</i>    |
| <i>RDX</i>        | <i>KRT82</i>     | <i>PRKCQ</i>    |
| <i>RECK</i>       | <i>KRT85</i>     | <i>PRKD1</i>    |
| <i>RECQL5</i>     | <i>KRTAP1-1</i>  | <i>PRKG1</i>    |
| <i>REL</i>        | <i>KRTAP13-2</i> | <i>PRKN</i>     |
| <i>RELN</i>       | <i>KRTAP1-5</i>  | <i>PRKRA</i>    |
| <i>RELT</i>       | <i>KRTAP17-1</i> | <i>PRKX</i>     |
| <i>RER1</i>       | <i>KRTAP19-3</i> | <i>PRMT2</i>    |
| <i>RERG</i>       | <i>KRTAP24-1</i> | <i>PRMT3</i>    |
| <i>RESF1</i>      | <i>KRTAP3-1</i>  | <i>PRMT6</i>    |
| <i>RETREG1</i>    | <i>KRTAP4-11</i> | <i>PRMT9</i>    |

|         |            |         |
|---------|------------|---------|
| RETREG2 | KRTAP4-7   | PROB1   |
| RETREG3 | KRTAP4-9   | PROM2   |
| REV1    | KRTAP5-6   | PROSER3 |
| REXO5   | KSR1       | PROX1   |
| RFC1    | KSR2       | PRPF38A |
| RFC2    | KXD1       | PRPF38B |
| RFESD   | KYAT1      | PRPF39  |
| RFK     | KYAT3      | PRPF4B  |
| RFLNB   | KYNU       | PRPS1   |
| RFPL4B  | L1TD1      | PRPS1L1 |
| RFX2    | L2HGDH     | PRR14L  |
| RFX3    | L3MBTL4    | PRR15   |
| RFX4    | LACC1      | PRR15L  |
| RFX5    | LACTB2-AS1 | PRR29   |
| RGL1    | LALBA      | PRR3    |
| RGL3    | LAMA1      | PRR5L   |
| RGMB    | LAMA2      | PRRC1   |
| RGP1    | LAMA4      | PRRG1   |
| RGS10   | LAMB4      | PRRG4   |
| RGS12   | LAMC1      | PRRT1   |
| RGS18   | LAMC2      | PRRX1   |
| RGS20   | LAMC3      | PRSS12  |
| RGS4    | LAMP2      | PRSS23  |
| RGS5    | LAMP3      | PRSS36  |
| RGS6    | LAMTOR3    | PRSS37  |
| RGS7    | LANCL2     | PRSS8   |
| RGS9BP  | LANCL3     | PRTG    |
| RHBDD1  | LAPTM4A    | PRUNE1  |
| RHBDL3  | LAPTM5     | PRUNE2  |
| RHEB    | LARP1B     | PRXL2A  |
| RHOA    | LARP4      | PSAP    |
| RHOBTB3 | LARP6      | PSD3    |
| RHOC    | LARP7      | PSD4    |
| RHOT1   | LARS       | PSEN1   |
| RHOT2   | LARS2      | PSG1    |
| RHOU    | LASP1      | PSG4    |
| RIBC1   | LAT2       | PSG8    |
| RIC1    | LATS1      | PSIP1   |
| RIC8B   | LATS2      | PSMA4   |
| RICTOR  | LAX1       | PSMB1   |
| RILPL1  | LAYN       | PSMB11  |
| RIMBP2  | LBH        | PSMB5   |
| RIMKLA  | LBHD1      | PSMB7   |
| RIMS2   | LBR        | PSMC4   |

|                     |                 |               |
|---------------------|-----------------|---------------|
| <i>RIMS3</i>        | <i>LBX1</i>     | <i>PSMD11</i> |
| <i>RIMS4</i>        | <i>LCA5</i>     | <i>PSMD4</i>  |
| <i>RIPOR3</i>       | <i>LCE1A</i>    | <i>PSME3</i>  |
| <i>RIPPLY1</i>      | <i>LCE1F</i>    | <i>PSMF1</i>  |
| <i>RIPPLY3</i>      | <i>LCLAT1</i>   | <i>PSPH</i>   |
| <i>RIT1</i>         | <i>LCOR</i>     | <i>PTAFR</i>  |
| <i>RIT2</i>         | <i>LCORL</i>    | <i>PTAR1</i>  |
| <i>RITA1</i>        | <i>LCP2</i>     | <i>PTBP2</i>  |
| <i>RLIM</i>         | <i>LDAH</i>     | <i>PTBP3</i>  |
| <i>RLN3</i>         | <i>LDB1</i>     | <i>PTCD2</i>  |
| <i>RMI2</i>         | <i>LDB3</i>     | <i>PTCD3</i>  |
| <i>RMND5A</i>       | <i>LDHA</i>     | <i>PTCH1</i>  |
| <i>RNASE4</i>       | <i>LDLR</i>     | <i>PTCHD1</i> |
| <i>RNASEH2B</i>     | <i>LDLRAD1</i>  | <i>PTCHD4</i> |
| <i>RNF10</i>        | <i>LDLRAD2</i>  | <i>PTDSS1</i> |
| <i>RNF103-CHMP3</i> | <i>LDLRAD3</i>  | <i>PTEN</i>   |
| <i>RNF11</i>        | <i>LDLRAD4</i>  | <i>PTGER2</i> |
| <i>RNF130</i>       | <i>LDLRAP1</i>  | <i>PTGFR</i>  |
| <i>RNF135</i>       | <i>LEF1</i>     | <i>PTGS1</i>  |
| <i>RNF141</i>       | <i>LEKR1</i>    | <i>PTH2R</i>  |
| <i>RNF144A</i>      | <i>LEMD3</i>    | <i>PTHLH</i>  |
| <i>RNF144B</i>      | <i>LEP</i>      | <i>PTK2</i>   |
| <i>RNF149</i>       | <i>LEPR</i>     | <i>PTPA</i>   |
| <i>RNF150</i>       | <i>LEPROT</i>   | <i>PTPMT1</i> |
| <i>RNF152</i>       | <i>LEPROTL1</i> | <i>PTPN1</i>  |
| <i>RNF165</i>       | <i>LETM1</i>    | <i>PTPN11</i> |
| <i>RNF168</i>       | <i>LETM2</i>    | <i>PTPN18</i> |
| <i>RNF169</i>       | <i>LETMD1</i>   | <i>PTPN3</i>  |
| <i>RNF180</i>       | <i>LGALS1</i>   | <i>PTPN4</i>  |
| <i>RNF187</i>       | <i>LGI2</i>     | <i>PTPRF</i>  |
| <i>RNF19B</i>       | <i>LGR4</i>     | <i>PTPRJ</i>  |
| <i>RNF2</i>         | <i>LGR5</i>     | <i>PTPRK</i>  |
| <i>RNF20</i>        | <i>LGSN</i>     | <i>PTPRM</i>  |
| <i>RNF212B</i>      | <i>LHCGR</i>    | <i>PTPRN</i>  |
| <i>RNF213</i>       | <i>LHPP</i>     | <i>PTPRO</i>  |
| <i>RNF215</i>       | <i>LHX4</i>     | <i>PTPRR</i>  |
| <i>RNF217</i>       | <i>LHX6</i>     | <i>PTPRT</i>  |
| <i>RNF24</i>        | <i>LHX8</i>     | <i>PTPRZ1</i> |
| <i>RNF32</i>        | <i>LHX9</i>     | <i>PTRH2</i>  |
| <i>RNF4</i>         | <i>LIFR</i>     | <i>PUM3</i>   |
| <i>RNF41</i>        | <i>LIG3</i>     | <i>PURA</i>   |
| <i>RNF43</i>        | <i>LILRA1</i>   | <i>PURB</i>   |
| <i>RNF44</i>        | <i>LILRA6</i>   | <i>PURG</i>   |
| <i>RNF7</i>         | <i>LILRB4</i>   | <i>PUS7</i>   |

|                       |                        |                  |
|-----------------------|------------------------|------------------|
| <i>RNFT2</i>          | <i>LIMCH1</i>          | <i>PVR</i>       |
| <i>RNGTT</i>          | <i>LIMD1</i>           | <i>PWP1</i>      |
| <i>RNLS</i>           | <i>LIN28A</i>          | <i>PWP2</i>      |
| <i>RNMT</i>           | <i>LIN28B</i>          | <i>PWWP2A</i>    |
| <i>RNPEPL1</i>        | <i>LIN52</i>           | <i>PXDN</i>      |
| <i>RNPS1</i>          | <i>LIN54</i>           | <i>PXK</i>       |
| <i>RO60</i>           | <i>LIN7A</i>           | <i>PXMP4</i>     |
| <i>ROBO2</i>          | <i>LIN7C</i>           | <i>PXN</i>       |
| <i>ROMO1</i>          | <i>LIN9</i>            | <i>PXYLP1</i>    |
| <i>ROPN1</i>          | <i>LINC00239</i>       | <i>PYCR1</i>     |
| <i>RORA</i>           | <i>LINC00346</i>       | <i>PYGB</i>      |
| <i>RORB</i>           | <i>LINC00598</i>       | <i>PYGO1</i>     |
| <i>ROS1</i>           | <i>LINC01124</i>       | <i>PYROXD1</i>   |
| <i>RPA3</i>           | <i>LINC01148</i>       | <i>QKI</i>       |
| <i>RPAP2</i>          | <i>LINC01164</i>       | <i>QPRT</i>      |
| <i>RPAP3</i>          | <i>LINC01465</i>       | <i>QSER1</i>     |
| <i>RPE</i>            | <i>LINC01554</i>       | <i>QSOX1</i>     |
| <i>RPH3A</i>          | <i>LINC01555</i>       | <i>QSOX2</i>     |
| <i>RPL10</i>          | <i>LINC01559</i>       | <i>R3HCC1</i>    |
| <i>RPL10A</i>         | <i>LINC01590</i>       | <i>RAB11A</i>    |
| <i>RPL12</i>          | <i>LINC01619</i>       | <i>RAB11B</i>    |
| <i>RPL13</i>          | <i>LINC01664</i>       | <i>RAB11FIP2</i> |
| <i>RPL15</i>          | <i>LINC01909</i>       | <i>RAB11FIP3</i> |
| <i>RPL17-C18orf32</i> | <i>LINC02089</i>       | <i>RAB11FIP5</i> |
| <i>RPL24</i>          | <i>LINC02166</i>       | <i>RAB14</i>     |
| <i>RPL27A</i>         | <i>LINC02312</i>       | <i>RAB15</i>     |
| <i>RPL28</i>          | <i>LINC02453</i>       | <i>RAB17</i>     |
| <i>RPL31</i>          | <i>LINGO2</i>          | <i>RAB18</i>     |
| <i>RPL37</i>          | <i>LINGO4</i>          | <i>RAB1A</i>     |
| <i>RPL37A</i>         | <i>LIPA</i>            | <i>RAB1B</i>     |
| <i>RPL3L</i>          | <i>LIPC</i>            | <i>RAB22A</i>    |
| <i>RPL7L1</i>         | <i>LIPG</i>            | <i>RAB23</i>     |
| <i>RPL8</i>           | <i>LIPH</i>            | <i>RAB27A</i>    |
| <i>RPP14</i>          | <i>LIPN</i>            | <i>RAB27B</i>    |
| <i>RPP40</i>          | <i>LIPT2</i>           | <i>RAB30</i>     |
| <i>RPRD1B</i>         | <i>LITAF</i>           | <i>RAB31</i>     |
| <i>RPRD2</i>          | <i>LIX1</i>            | <i>RAB32</i>     |
| <i>RPS14</i>          | <i>LL22NC03-63E9.3</i> | <i>RAB33B</i>    |
| <i>RPS15A</i>         | <i>LLPH</i>            | <i>RAB36</i>     |
| <i>RPS17</i>          | <i>LMAN1</i>           | <i>RAB37</i>     |
| <i>RPS2</i>           | <i>LMAN2L</i>          | <i>RAB38</i>     |
| <i>RPS20</i>          | <i>LMBR1</i>           | <i>RAB39B</i>    |
| <i>RPS23</i>          | <i>LMBRD2</i>          | <i>RAB3A</i>     |
| <i>RPS3</i>           | <i>LMCD1</i>           | <i>RAB3B</i>     |

|         |              |          |
|---------|--------------|----------|
| RPS6KA1 | MLLN         | RAB3C    |
| RPS6KA6 | LMNB2        | RAB3D    |
| RPS6KB1 | LMNTD1       | RAB3GAP1 |
| RPTOR   | LMO2         | RAB3GAP2 |
| RPUSD2  | LMO3         | RAB40B   |
| RRAGC   | LMO4         | RAB42    |
| RREB1   | LMO7         | RAB43    |
| RRM2B   | LMOD1        | RAB4A    |
| RRP12   | LMOD2        | RAB5A    |
| RRP36   | LMTK2        | RAB5B    |
| RRP7A   | LMX1A        | RAB5C    |
| RRP8    | LNP1         | RAB6B    |
| RS1     | LNPEP        | RAB7A    |
| RSBN1   | LNPK         | RAB9B    |
| RSBN1L  | LNX1         | RABGAP1  |
| RSC1A1  | LNX2         | RABIF    |
| RSF1    | LOC100131496 | RABL2B   |
| RSKR    | LOC100288208 | RACGAP1  |
| RSL1D1  | LOC100996385 | RAD1     |
| RSPH3   | LOC100996419 | RAD18    |
| RSPO2   | LOC105375614 | RAD23B   |
| RSRC2   | LOC107983990 | RAD50    |
| RTCB    | LOC107986898 | RAD51    |
| RTF1    | LOC400464    | RAD51AP1 |
| RTKN2   | LOC401589    | RAD51B   |
| RTL4    | LOC644656    | RAD51C   |
| RTL6    | LOC730098    | RAD52    |
| RTL8B   | LOC730338    | RAD54L   |
| RTN1    | LOH12CR2     | RAD9B    |
| RTN3    | LONP2        | RADX     |
| RUBCN   | LONRF1       | RAG1     |
| RUBCNL  | LONRF2       | RAI14    |
| RUFY2   | LONRF3       | RALA     |
| RUNDC1  | LOX          | RALGAPA1 |
| RUNDC3A | LPAR3        | RALGPS1  |
| RUNX1T1 | LPAR4        | RALY     |
| RUNX2   | LPCAT1       | RAN      |
| RWDD1   | LPCAT2       | RANBP10  |
| RWDD2A  | LPCAT3       | RANBP17  |
| RWDD2B  | LPGAT1       | RANBP2   |
| RXRB    | LPIN1        | RANBP3L  |
| RYSR2   | LPIN2        | RANBP6   |
| S100A16 | LPO          | RANGAP1  |
| S100B   | LPP          | RAP1A    |

|                |                 |                   |
|----------------|-----------------|-------------------|
| <i>S100PBP</i> | <i>LPXN</i>     | <i>RAP1B</i>      |
| <i>S1PR1</i>   | <i>LRAT</i>     | <i>RAP2A</i>      |
| <i>S1PR3</i>   | <i>LRATD1</i>   | <i>RAP2B</i>      |
| <i>SACM1L</i>  | <i>LRATD2</i>   | <i>RAPGEF1</i>    |
| <i>SAFB</i>    | <i>LRCH1</i>    | <i>RAPGEF2</i>    |
| <i>SAFB2</i>   | <i>LRCH2</i>    | <i>RAPGEF3</i>    |
| <i>SALL4</i>   | <i>LRCH3</i>    | <i>RAPGEF5</i>    |
| <i>SAMD1</i>   | <i>LRGUK</i>    | <i>RAPGEF6</i>    |
| <i>SAMD10</i>  | <i>LRIF1</i>    | <i>RAPH1</i>      |
| <i>SAMD12</i>  | <i>LRIG1</i>    | <i>RASA2</i>      |
| <i>SAMD4A</i>  | <i>LRIG2</i>    | <i>RASA4</i>      |
| <i>SAMD5</i>   | <i>LRIG3</i>    | <i>RASA4B</i>     |
| <i>SAMD8</i>   | <i>LRP10</i>    | <i>RASEF</i>      |
| <i>SAMHD1</i>  | <i>LRP11</i>    | <i>RASGRF1</i>    |
| <i>SAP130</i>  | <i>LRP12</i>    | <i>RASGRF2</i>    |
| <i>SAP30</i>   | <i>LRP1B</i>    | <i>RASGRP1</i>    |
| <i>SAP30L</i>  | <i>LRP5L</i>    | <i>RASSF1</i>     |
| <i>SAPCD2</i>  | <i>LRP6</i>     | <i>RASSF2</i>     |
| <i>SAR1A</i>   | <i>LRP8</i>     | <i>RASSF3</i>     |
| <i>SAR1B</i>   | <i>LRPAP1</i>   | <i>RASSF6</i>     |
| <i>SARAF</i>   | <i>LRPPRC</i>   | <i>RASSF8</i>     |
| <i>SARDH</i>   | <i>LRR1</i>     | <i>RASSF9</i>     |
| <i>SARS</i>    | <i>LRRC1</i>    | <i>RB1</i>        |
| <i>SART1</i>   | <i>LRRC14B</i>  | <i>RBAK</i>       |
| <i>SATB1</i>   | <i>LRRC15</i>   | <i>RBBP7</i>      |
| <i>SAXO2</i>   | <i>LRRC18</i>   | <i>RBCK1</i>      |
| <i>SBF1</i>    | <i>LRRC19</i>   | <i>RBFA</i>       |
| <i>SBK1</i>    | <i>LRRC2</i>    | <i>RBFOX1</i>     |
| <i>SC5D</i>    | <i>LRRC28</i>   | <i>RBFOX2</i>     |
| <i>SCAF8</i>   | <i>LRRC3</i>    | <i>RBM14-RBM4</i> |
| <i>SCAI</i>    | <i>LRRC31</i>   | <i>RBM18</i>      |
| <i>SCARB2</i>  | <i>LRRC32</i>   | <i>RBM24</i>      |
| <i>SCD</i>     | <i>LRRC34</i>   | <i>RBM27</i>      |
| <i>SCD5</i>    | <i>LRRC37A3</i> | <i>RBM28</i>      |
| <i>SCG3</i>    | <i>LRRC3B</i>   | <i>RBM33</i>      |
| <i>SCG5</i>    | <i>LRRC3C</i>   | <i>RBM39</i>      |
| <i>SCHIP1</i>  | <i>LRRC40</i>   | <i>RBM4</i>       |
| <i>SCLT1</i>   | <i>LRRC49</i>   | <i>RBM45</i>      |
| <i>SCN11A</i>  | <i>LRRC4C</i>   | <i>RBM48</i>      |
| <i>SCN1A</i>   | <i>LRRC57</i>   | <i>RBM4B</i>      |
| <i>SCN8A</i>   | <i>LRRC58</i>   | <i>RBM5</i>       |
| <i>SCNN1A</i>  | <i>LRRC59</i>   | <i>RBM6</i>       |
| <i>SCO1</i>    | <i>LRRC7</i>    | <i>RBM7</i>       |
| <i>SCRN1</i>   | <i>LRRC73</i>   | <i>RBMS1</i>      |



|           |            |         |
|-----------|------------|---------|
| SCRN3     | LRRC75A    | RBMS2   |
| SCUBE3    | LRRC8B     | RBMX2   |
| SDAD1     | LRRC8C     | RBMXL1  |
| SDC1      | LRRCC1     | RBP2    |
| SDC2      | LRRFIP1    | RBPM5   |
| SDCBP     | LRRK2      | RBPM52  |
| SDHA      | LRRN1      | RBSN    |
| SDHAF1    | LRRN3      | RBX1    |
| SDHAF2    | LRRTM1     | RCAN3   |
| SDK1      | LRRTM2     | RCBTB2  |
| SEC16B    | LRRTM3     | RCC2    |
| SEC22C    | LRRTM4     | RCCD1   |
| SEC23IP   | LRTOMT     | RCL1    |
| SEC24A    | LSAMP      | RCN2    |
| SEC24B    | LSG1       | RCOR1   |
| SEC24C    | LSM10      | RCSD1   |
| SEC31B    | LSM11      | RCVRN   |
| SEC62     | LSM14A     | RD3     |
| SEC63     | LSM2       | RD3L    |
| SECISBP2  | LSM3       | RDH13   |
| SECISBP2L | LSM5       | RDX     |
| SEH1L     | LSM6       | RECK    |
| SELENOF   | LSM8       | RECQL5  |
| SELENOI   | LTA        | REEP3   |
| SELENOS   | LTB4R      | REL     |
| SELENOT   | LTBP2      | RELN    |
| SELENOV   | LTBR       | RELT    |
| SELP      | LTV1       | RER1    |
| SEM1      | LUC7L3     | RERG    |
| SEMA3A    | LUM        | RESF1   |
| SEMA3C    | LURAP1     | RETREG1 |
| SEMA4B    | LURAP1L    | RETREG2 |
| SEMA4C    | LUZP1      | RETREG3 |
| SEMA4F    | LUZP2      | REV1    |
| SEMA4G    | LUZP6      | REXO5   |
| SEMA5A    | LVRN       | RFC2    |
| SEMA6A    | LXN        | RFESD   |
| SEMA6D    | LY6D       | RFK     |
| SENP2     | LY6G5B     | RFLNB   |
| SENP7     | LY6K       | RFPL4B  |
| SEPHS1    | LY75       | RFX2    |
| SEPTIN11  | LY75-CD302 | RFX3    |
| SEPTIN14  | LYN        | RFX4    |
| SEPTIN2   | LYPD6      | RFX5    |

|          |         |         |
|----------|---------|---------|
| SEPTIN7  | LYPLA1  | RGL1    |
| SEPTIN8  | LYPLAL1 | RGL3    |
| SERAC1   | LYRM2   | RGMB    |
| SERBP1   | LYRM4   | RGP1    |
| SERHL2   | LYRM7   | RGS10   |
| SERINC1  | LYSMD3  | RGS12   |
| SERINC3  | LYVE1   | RGS13   |
| SERPINB2 | LZIC    | RGS18   |
| SERPINB5 | LZTFL1  | RGS20   |
| SERPINB9 | LZTS1   | RGS4    |
| SERPIND1 | M1AP    | RGS5    |
| SERPINH1 | M6PR    | RGS6    |
| SERTAD2  | MAATS1  | RGS7    |
| SERTAD4  | MAB21L3 | RGS9BP  |
| SERTM1   | MACC1   | RHBDD1  |
| SESN2    | MACF1   | RHBDL3  |
| SESN3    | MACO1   | RHEB    |
| SESTD1   | MACROD2 | RHOA    |
| SETD1A   | MAD2L1  | RHOBTB3 |
| SETD1B   | MADD    | RHOC    |
| SETD5    | MAF     | RHOH    |
| SETD7    | MAFB    | RHOT1   |
| SETD9    | MAFF    | RHOT2   |
| SF3A1    | MAFG    | RHOU    |
| SF3A3    | MAFK    | RIBC1   |
| SF3B3    | MAG     | RIC1    |
| SF3B4    | MAGEA11 | RIC8B   |
| SF3B6    | MAGEB10 | RICTOR  |
| SFPQ     | MAGEB18 | RILPL1  |
| SFRP1    | MAGEC2  | RIMBP2  |
| SFRP2    | MAGEL2  | RIMKLA  |
| SFT2D2   | MAGI1   | RIMKLB  |
| SFT2D3   | MAGI2   | RIMS2   |
| SFXN1    | MAGI3   | RIMS3   |
| SFXN2    | MAGOHB  | RIMS4   |
| SFXN5    | MAK     | RIN2    |
| SGCD     | MAK16   | RIPOR3  |
| SGCG     | MALSU1  | RIPPLY1 |
| SGO1     | MALT1   | RIPPLY3 |
| SGPL1    | MAML1   | RIT1    |
| SGTB     | MAML2   | RIT2    |
| SH2B3    | MAML3   | RLIM    |
| SH2D1B   | MAMLD1  | RLN3    |
| SH2D4A   | MAN1A1  | RMI2    |

|                 |                  |                     |
|-----------------|------------------|---------------------|
| <i>SH3BGRL</i>  | <i>MAN1A2</i>    | <i>RMND5A</i>       |
| <i>SH3BGRL2</i> | <i>MAN2A1</i>    | <i>RNASE4</i>       |
| <i>SH3BP2</i>   | <i>MANBA</i>     | <i>RNASEH2B</i>     |
| <i>SH3BP4</i>   | <i>MANBAL</i>    | <i>RNF10</i>        |
| <i>SH3D19</i>   | <i>MANEA</i>     | <i>RNF103-CHMP3</i> |
| <i>SH3GLB1</i>  | <i>MANSC1</i>    | <i>RNF11</i>        |
| <i>SH3KBP1</i>  | <i>MAOA</i>      | <i>RNF130</i>       |
| <i>SH3PXD2B</i> | <i>MAP10</i>     | <i>RNF135</i>       |
| <i>SH3RF2</i>   | <i>MAP1B</i>     | <i>RNF141</i>       |
| <i>SH3RF3</i>   | <i>MAP2</i>      | <i>RNF144A</i>      |
| <i>SHB</i>      | <i>MAP2K1</i>    | <i>RNF144B</i>      |
| <i>SHC3</i>     | <i>MAP2K4</i>    | <i>RNF149</i>       |
| <i>SHCBP1</i>   | <i>MAP2K6</i>    | <i>RNF150</i>       |
| <i>SHE</i>      | <i>MAP3K1</i>    | <i>RNF152</i>       |
| <i>SHISA2</i>   | <i>MAP3K13</i>   | <i>RNF157</i>       |
| <i>SHISA6</i>   | <i>MAP3K19</i>   | <i>RNF165</i>       |
| <i>SHISA7</i>   | <i>MAP3K20</i>   | <i>RNF168</i>       |
| <i>SHISA9</i>   | <i>MAP3K21</i>   | <i>RNF169</i>       |
| <i>SHISAL1</i>  | <i>MAP3K5</i>    | <i>RNF180</i>       |
| <i>SHLD2</i>    | <i>MAP3K7</i>    | <i>RNF182</i>       |
| <i>SHMT1</i>    | <i>MAP3K7CL</i>  | <i>RNF185</i>       |
| <i>SHOC2</i>    | <i>MAP3K8</i>    | <i>RNF187</i>       |
| <i>SHPRH</i>    | <i>MAP3K9</i>    | <i>RNF19B</i>       |
| <i>SHQ1</i>     | <i>MAP4K3</i>    | <i>RNF2</i>         |
| <i>SHROOM1</i>  | <i>MAP6</i>      | <i>RNF20</i>        |
| <i>SHROOM2</i>  | <i>MAP6D1</i>    | <i>RNF207</i>       |
| <i>SHROOM3</i>  | <i>MAP7</i>      | <i>RNF212</i>       |
| <i>SHROOM4</i>  | <i>MAP9</i>      | <i>RNF212B</i>      |
| <i>SHTN1</i>    | <i>MAPK1</i>     | <i>RNF213</i>       |
| <i>SI</i>       | <i>MAPK10</i>    | <i>RNF215</i>       |
| <i>SIAE</i>     | <i>MAPK13</i>    | <i>RNF217</i>       |
| <i>SIAH3</i>    | <i>MAPK14</i>    | <i>RNF24</i>        |
| <i>SIGIRR</i>   | <i>MAPK1IP1L</i> | <i>RNF32</i>        |
| <i>SIGLEC1</i>  | <i>MAPK6</i>     | <i>RNF4</i>         |
| <i>SIGLEC11</i> | <i>MAPK8</i>     | <i>RNF41</i>        |
| <i>SIGLEC14</i> | <i>MAPK9</i>     | <i>RNF43</i>        |
| <i>SIGLEC6</i>  | <i>MAPKAP1</i>   | <i>RNF44</i>        |
| <i>SIGLEC9</i>  | <i>MAPKAPK3</i>  | <i>RNF6</i>         |
| <i>SIKE1</i>    | <i>MAPKAPK5</i>  | <i>RNF7</i>         |
| <i>SIM1</i>     | <i>MAPRE1</i>    | <i>RNFT2</i>        |
| <i>SIM2</i>     | <i>MAPRE2</i>    | <i>RNGTT</i>        |
| <i>SIN3B</i>    | <i>MAPT</i>      | <i>RNLS</i>         |
| <i>SIPA1</i>    | <i>MARC1</i>     | <i>RNMT</i>         |
| <i>SIRPA</i>    | <i>MARCH1</i>    | <i>RNPEPL1</i>      |

|                 |               |                       |
|-----------------|---------------|-----------------------|
| <i>SIRPB2</i>   | <i>MARCH3</i> | <i>RNPS1</i>          |
| <i>SIRT1</i>    | <i>MARCH4</i> | <i>RO60</i>           |
| <i>SIX1</i>     | <i>MARCH6</i> | <i>ROBO2</i>          |
| <i>SIX6</i>     | <i>MARCH7</i> | <i>ROCK1</i>          |
| <i>SKA2</i>     | <i>MARCH8</i> | <i>ROMO1</i>          |
| <i>SKA3</i>     | <i>MARCH9</i> | <i>ROPN1</i>          |
| <i>SKAP2</i>    | <i>MARF1</i>  | <i>RORA</i>           |
| <i>SKIL</i>     | <i>MARK4</i>  | <i>RORB</i>           |
| <i>SKIV2L</i>   | <i>MARS2</i>  | <i>ROS1</i>           |
| <i>SKP1</i>     | <i>MASP1</i>  | <i>RPA4</i>           |
| <i>SLAIN2</i>   | <i>MASP2</i>  | <i>RPAP2</i>          |
| <i>SLAMF1</i>   | <i>MAST3</i>  | <i>RPAP3</i>          |
| <i>SLAMF6</i>   | <i>MASTL</i>  | <i>RPE</i>            |
| <i>SLAMF7</i>   | <i>MAT2B</i>  | <i>RPH3A</i>          |
| <i>SLAMF8</i>   | <i>MATN1</i>  | <i>RPL10</i>          |
| <i>SLBP</i>     | <i>MATN2</i>  | <i>RPL10A</i>         |
| <i>SLC10A2</i>  | <i>MAVS</i>   | <i>RPL12</i>          |
| <i>SLC10A7</i>  | <i>MB21D2</i> | <i>RPL13</i>          |
| <i>SLC13A1</i>  | <i>MBD1</i>   | <i>RPL13A</i>         |
| <i>SLC14A1</i>  | <i>MBD2</i>   | <i>RPL14</i>          |
| <i>SLC15A2</i>  | <i>MBD5</i>   | <i>RPL15</i>          |
| <i>SLC16A6</i>  | <i>MBD6</i>   | <i>RPL17-C18orf32</i> |
| <i>SLC16A7</i>  | <i>MBL2</i>   | <i>RPL21</i>          |
| <i>SLC17A2</i>  | <i>MBLAC2</i> | <i>RPL24</i>          |
| <i>SLC17A4</i>  | <i>MBNL1</i>  | <i>RPL27A</i>         |
| <i>SLC17A6</i>  | <i>MBNL2</i>  | <i>RPL28</i>          |
| <i>SLC17A8</i>  | <i>MBNL3</i>  | <i>RPL31</i>          |
| <i>SLC18A1</i>  | <i>MBOAT2</i> | <i>RPL37</i>          |
| <i>SLC19A1</i>  | <i>MBOAT7</i> | <i>RPL37A</i>         |
| <i>SLC19A3</i>  | <i>MBP</i>    | <i>RPL3L</i>          |
| <i>SLC1A1</i>   | <i>MBTD1</i>  | <i>RPL7</i>           |
| <i>SLC1A2</i>   | <i>MBTPS1</i> | <i>RPL8</i>           |
| <i>SLC22A10</i> | <i>MBTPS2</i> | <i>RPLP0</i>          |
| <i>SLC22A11</i> | <i>MC2R</i>   | <i>RPP14</i>          |
| <i>SLC22A15</i> | <i>MCAT</i>   | <i>RPP40</i>          |
| <i>SLC22A9</i>  | <i>MCC</i>    | <i>RPRD1B</i>         |
| <i>SLC24A1</i>  | <i>MCCC1</i>  | <i>RPRD2</i>          |
| <i>SLC24A2</i>  | <i>MCCC2</i>  | <i>RPS14</i>          |
| <i>SLC24A3</i>  | <i>MCEMP1</i> | <i>RPS15A</i>         |
| <i>SLC24A4</i>  | <i>MCF2</i>   | <i>RPS20</i>          |
| <i>SLC25A1</i>  | <i>MCF2L2</i> | <i>RPS23</i>          |
| <i>SLC25A10</i> | <i>MCFD2</i>  | <i>RPS24</i>          |
| <i>SLC25A11</i> | <i>MCHR2</i>  | <i>RPS29</i>          |
| <i>SLC25A12</i> | <i>MCL1</i>   | <i>RPS3</i>           |

|              |         |         |
|--------------|---------|---------|
| SLC25A13     | MCM10   | RPS6KA1 |
| SLC25A15     | MCM3AP  | RPS6KA6 |
| SLC25A16     | MCM5    | RPS6KB1 |
| SLC25A21     | MCM8    | RPS7    |
| SLC25A21-AS1 | MCM9    | RPTOR   |
| SLC25A24     | MCMBP   | RPUSD2  |
| SLC25A26     | MCMD2C2 | RRAGC   |
| SLC25A34     | MCOLN2  | RRB1    |
| SLC25A36     | MCPH1   | RRM2B   |
| SLC25A37     | MCTP1   | RRN3    |
| SLC25A39     | MCTP2   | RRP12   |
| SLC25A43     | MCTS1   | RRP15   |
| SLC25A44     | MCU     | RRP36   |
| SLC25A45     | MCUB    | RRP8    |
| SLC25A46     | MCUR1   | RS1     |
| SLC25A51     | MDFIC   | RSBN1   |
| SLC26A2      | MDH2    | RSBN1L  |
| SLC27A4      | MDM1    | RSC1A1  |
| SLC28A1      | MDM4    | RSF1    |
| SLC29A1      | MDN1    | RSKR    |
| SLC2A10      | ME1     | RSL1D1  |
| SLC2A13      | ME2     | RSPH3   |
| SLC2A3       | MEAF6   | RSPH9   |
| SLC2A4       | MECOM   | RSP02   |
| SLC2A5       | MECP2   | RSP03   |
| SLC30A1      | MED1    | RSRC2   |
| SLC30A4      | MED10   | RTCA    |
| SLC30A5      | MED12L  | RTF1    |
| SLC30A6      | MED13   | RTKN2   |
| SLC30A7      | MED13L  | RTL4    |
| SLC30A8      | MED14   | RTL6    |
| SLC31A1      | MED17   | RTL8B   |
| SLC34A1      | MED18   | RTN1    |
| SLC34A2      | MED21   | RTN3    |
| SLC35A2      | MED28   | RUBCN   |
| SLC35A4      | MED4    | RUBCNL  |
| SLC35B4      | MED6    | RUFY2   |
| SLC35D2      | MED7    | RUNDC1  |
| SLC35E1      | MED9    | RUNDC3A |
| SLC35E4      | MEF2A   | RUNDC3B |
| SLC35F1      | MEF2C   | RUNX1   |
| SLC35F5      | MEFV    | RUNX1T1 |
| SLC35F6      | MEGF10  | RUNX2   |
| SLC36A1      | MEGF6   | RWDD1   |

|          |          |         |
|----------|----------|---------|
| SLC36A3  | MEGF8    | RWDD2A  |
| SLC36A4  | MEGF9    | RWDD2B  |
| SLC37A4  | MEI4     | RXFP3   |
| SLC38A1  | MEIOC    | RYR2    |
| SLC38A7  | MEIS1    | S100A16 |
| SLC38A9  | MEIS2    | S100B   |
| SLC39A10 | MELK     | S100PBP |
| SLC39A13 | MEMO1    | S1PR1   |
| SLC39A14 | MEP1A    | S1PR3   |
| SLC39A2  | MEPCE    | SACM1L  |
| SLC39A6  | MERTK    | SAFB    |
| SLC39A7  | MESD     | SAFB2   |
| SLC39A8  | MESP1    | SALL1   |
| SLC39A9  | MEST     | SALL4   |
| SLC3A1   | MET      | SAMD1   |
| SLC40A1  | METAP1   | SAMD10  |
| SLC41A1  | METAP2   | SAMD12  |
| SLC44A1  | METTL4   | SAMD4A  |
| SLC44A5  | METTL15  | SAMD5   |
| SLC45A3  | METTL16  | SAMD8   |
| SLC47A1  | METTL21A | SAMHD1  |
| SLC4A4   | METTL22  | SAP130  |
| SLC4A7   | METTL24  | SAP30   |
| SLC4A8   | METTL2A  | SAP30L  |
| SLC5A12  | METTL4   | SAPCD2  |
| SLC5A3   | METTL6   | SAR1A   |
| SLC5A7   | METTL8   | SAR1B   |
| SLC6A1   | MEX3A    | SARAF   |
| SLC6A11  | MEX3B    | SARDH   |
| SLC6A15  | MFAP3L   | SARS    |
| SLC6A17  | MFAP5    | SATB1   |
| SLC6A19  | MFF      | SAXO2   |
| SLC6A2   | MFHAS1   | SBF1    |
| SLC6A3   | MFN1     | SBK1    |
| SLC6A8   | MFSD11   | SC5D    |
| SLC6A9   | MFSD13A  | SCAF8   |
| SLC7A11  | MFSD14B  | SCAI    |
| SLC7A14  | MFSD14C  | SCARB2  |
| SLC7A2   | MFSD2A   | SCD     |
| SLC7A6   | MFSD2B   | SCD5    |
| SLC7A6OS | MFSD4A   | SCG3    |
| SLC7A9   | MFSD4B   | SCHIP1  |
| SLC8A1   | MFSD6    | SCIN    |
| SLC9A3R2 | MFSD9    | SCLT1   |

|                |                  |                  |
|----------------|------------------|------------------|
| <i>SLC9B2</i>  | <i>MGA</i>       | <i>SCN11A</i>    |
| <i>SLCO1A2</i> | <i>MGAM</i>      | <i>SCN1A</i>     |
| <i>SLCO1C1</i> | <i>MGARP</i>     | <i>SCN8A</i>     |
| <i>SLCO3A1</i> | <i>MGAT1</i>     | <i>SCN9A</i>     |
| <i>SLCO5A1</i> | <i>MGAT2</i>     | <i>SCO1</i>      |
| <i>SLF1</i>    | <i>MGAT3</i>     | <i>SCRN1</i>     |
| <i>SLF2</i>    | <i>MGAT4A</i>    | <i>SCRN3</i>     |
| <i>SLFN11</i>  | <i>MGC15885</i>  | <i>SCUBE3</i>    |
| <i>SLFN12L</i> | <i>MGME1</i>     | <i>SDAD1</i>     |
| <i>SLFN5</i>   | <i>MGP</i>       | <i>SDC1</i>      |
| <i>SLFNL1</i>  | <i>MGRN1</i>     | <i>SDC2</i>      |
| <i>SLIT1</i>   | <i>MGST1</i>     | <i>SDCBP</i>     |
| <i>SLIT2</i>   | <i>MGST3</i>     | <i>SDE2</i>      |
| <i>SLITRK5</i> | <i>MIA2</i>      | <i>SDHAF1</i>    |
| <i>SLK</i>     | <i>MIA3</i>      | <i>SDHAF2</i>    |
| <i>SLTM</i>    | <i>MIB1</i>      | <i>SDK1</i>      |
| <i>SLX4IP</i>  | <i>MICA</i>      | <i>SDR16C5</i>   |
| <i>SMAD2</i>   | <i>MICALCL</i>   | <i>SEC16B</i>    |
| <i>SMAD5</i>   | <i>MICALL1</i>   | <i>SEC22C</i>    |
| <i>SMAD7</i>   | <i>MICOS10</i>   | <i>SEC23IP</i>   |
| <i>SMAP1</i>   | <i>MICU2</i>     | <i>SEC24A</i>    |
| <i>SMARCA1</i> | <i>MICU3</i>     | <i>SEC24B</i>    |
| <i>SMARCA2</i> | <i>MID1</i>      | <i>SEC24C</i>    |
| <i>SMARCA4</i> | <i>MID2</i>      | <i>SEC31B</i>    |
| <i>SMARCA5</i> | <i>MIDN</i>      | <i>SEC62</i>     |
| <i>SMARCD1</i> | <i>MIEF1</i>     | <i>SEC63</i>     |
| <i>SMARCE1</i> | <i>MIEF2</i>     | <i>SECISBP2</i>  |
| <i>SMC1A</i>   | <i>MIER1</i>     | <i>SECISBP2L</i> |
| <i>SMC2</i>    | <i>MIER3</i>     | <i>SEH1L</i>     |
| <i>SMC3</i>    | <i>MIGA1</i>     | <i>SELENOF</i>   |
| <i>SMC6</i>    | <i>MINAR1</i>    | <i>SELENOI</i>   |
| <i>SMG7</i>    | <i>MINAR2</i>    | <i>SELENOS</i>   |
| <i>SMG9</i>    | <i>MINDY2</i>    | <i>SELENOT</i>   |
| <i>SMIM10</i>  | <i>MINK1</i>     | <i>SELENOV</i>   |
| <i>SMIM11A</i> | <i>MINPP1</i>    | <i>SELP</i>      |
| <i>SMIM12</i>  | <i>MIOS</i>      | <i>SEM1</i>      |
| <i>SMIM13</i>  | <i>MIPEP</i>     | <i>SEMA3A</i>    |
| <i>SMIM15</i>  | <i>MIPOL1</i>    | <i>SEMA3C</i>    |
| <i>SMIM17</i>  | <i>MIR2052HG</i> | <i>SEMA3D</i>    |
| <i>SMIM21</i>  | <i>MIR6501</i>   | <i>SEMA4B</i>    |
| <i>SMIM30</i>  | <i>MIS12</i>     | <i>SEMA4C</i>    |
| <i>SMLR1</i>   | <i>MIS18BP1</i>  | <i>SEMA4F</i>    |
| <i>SMNDC1</i>  | <i>MITF</i>      | <i>SEMA4G</i>    |
| <i>SMOC1</i>   | <i>MKI67</i>     | <i>SEMA5A</i>    |

|          |        |          |
|----------|--------|----------|
| SMOX     | MKKS   | SEMA6A   |
| SMPD3    | MKLN1  | SEMA6D   |
| SMTNL2   | MKRN1  | SENP2    |
| SMUG1    | MKRN2  | SENP7    |
| SMURF1   | MKX    | SEPHS1   |
| SMYD2    | MLANA  | SEPTIN14 |
| SNAP23   | MLEC   | SEPTIN2  |
| SNAP25   | MLH1   | SEPTIN6  |
| SNAP29   | MLH3   | SEPTIN7  |
| SNAP47   | MLIP   | SEPTIN8  |
| SNAPC1   | MLLT10 | SERAC1   |
| SNCB     | MLLT3  | SERBP1   |
| SND1     | MLXIP  | SERHL2   |
| SNF8     | MMAB   | SERINC1  |
| SNN      | MMADHC | SERINC3  |
| SNPH     | MMD    | SERINC4  |
| SNRNP200 | MMGT1  | SERPINB2 |
| SNRNP40  | MMP1   | SERPINB5 |
| SNRNP48  | MMP10  | SERPINB9 |
| SNRPD1   | MMP13  | SERPIND1 |
| SNRPD3   | MMP16  | SERPING1 |
| SNTB2    | MMP17  | SERPINH1 |
| SNX1     | MMP19  | SERTAD2  |
| SNX11    | MMP20  | SERTAD4  |
| SNX13    | MMP24  | SERTM1   |
| SNX19    | MMP27  | SESN2    |
| SNX2     | MMP8   | SESN3    |
| SNX21    | MMRN2  | SESTD1   |
| SNX24    | MMS22L | SETD1A   |
| SNX27    | MMUT   | SETD4    |
| SNX29    | MN1    | SETD5    |
| SNX30    | MNAT1  | SETD7    |
| SNX32    | MNDA   | SETD9    |
| SNX33    | MNS1   | SETMAR   |
| SNX4     | MOB1A  | SEZ6L    |
| SOBP     | MOB1B  | SF1      |
| SOC51    | MOB3A  | SF3A1    |
| SOC53    | MOB3B  | SF3A3    |
| SOC54    | MOB4   | SF3B1    |
| SOC55    | MOCOS  | SF3B3    |
| SOD2     | MOCS2  | SF3B4    |
| SON      | MOCS3  | SF3B6    |
| SORCS3   | MOGS   | SFPQ     |
| SORD     | MON1B  | SFRP1    |



|         |          |          |
|---------|----------|----------|
| SORL1   | MON2     | SFRP2    |
| SORT1   | MORC1    | SFT2D2   |
| SOS2    | MORC2    | SFT2D3   |
| SOSTDC1 | MORC4    | SFXN1    |
| SOWAHC  | MORF4L1  | SFXN2    |
| SOX1    | MORF4L2  | SFXN5    |
| SOX10   | MOSMO    | SGCD     |
| SOX11   | MOSPD1   | SGCE     |
| SOX3    | MOSPD2   | SGO1     |
| SOX4    | MOXD1    | SGPL1    |
| SOX5    | MPC1     | SGTA     |
| SP1     | MPC2     | SGTB     |
| SP100   | MPDZ     | SH2D1B   |
| SP3     | MPEG1    | SH2D4A   |
| SP4     | MPHOSPH8 | SH3BGRL  |
| SP8     | MPI      | SH3BGRL2 |
| SPA17   | MPIG6B   | SH3BP2   |
| SPAG6   | MPL      | SH3BP4   |
| SPAG9   | MPLKIP   | SH3D19   |
| SPARC   | MPND     | SH3D21   |
| SPART   | MPP1     | SH3GLB1  |
| SPATA17 | MPP3     | SH3KBP1  |
| SPATA2  | MPP4     | SH3PXD2B |
| SPATA5  | MPP5     | SH3RF2   |
| SPATS2  | MPP6     | SH3RF3   |
| SPATS2L | MPP7     | SHB      |
| SPCS1   | MPPED1   | SHC3     |
| SPCS2   | MPPED2   | SHCBP1   |
| SPECC1  | MPRIP    | SHE      |
| SPEF2   | MPV17L   | SHH      |
| SPIB    | MPZL1    | SHISA6   |
| SPIC    | MPZL2    | SHISA7   |
| SPICE1  | MPZL3    | SHISA9   |
| SPIDR   | MRAP2    | SHISAL1  |
| SPIN3   | MRAS     | SHLD2    |
| SPIN4   | MRE11    | SHMT1    |
| SPINT1  | MREG     | SHOC2    |
| SPNS1   | MRGBP    | SHPRH    |
| SPOCK1  | MRGPRF   | SHQ1     |
| SPOCK2  | MRI1     | SHROOM1  |
| SPOCK3  | MRM3     | SHROOM2  |
| SPOUT1  | MRO      | SHROOM3  |
| SPPL2A  | MROH1    | SHROOM4  |
| SPPL3   | MROH9    | SHTN1    |

|                 |                |                 |
|-----------------|----------------|-----------------|
| <i>SPRED1</i>   | <i>MRPL1</i>   | <i>SI</i>       |
| <i>SPRED2</i>   | <i>MRPL10</i>  | <i>SIAE</i>     |
| <i>SPRY1</i>    | <i>MRPL11</i>  | <i>SIAH3</i>    |
| <i>SPRY4</i>    | <i>MRPL12</i>  | <i>SIGIRR</i>   |
| <i>SPRYD4</i>   | <i>MRPL13</i>  | <i>SIGLEC1</i>  |
| <i>SPTBN1</i>   | <i>MRPL17</i>  | <i>SIGLEC11</i> |
| <i>SPTBN2</i>   | <i>MRPL18</i>  | <i>SIGLEC14</i> |
| <i>SPTSSA</i>   | <i>MRPL19</i>  | <i>SIGLEC6</i>  |
| <i>SQSTM1</i>   | <i>MRPL22</i>  | <i>SIGLEC9</i>  |
| <i>SRD5A1</i>   | <i>MRPL3</i>   | <i>SIKE1</i>    |
| <i>SRD5A3</i>   | <i>MRPL30</i>  | <i>SIM1</i>     |
| <i>SREBF2</i>   | <i>MRPL34</i>  | <i>SIM2</i>     |
| <i>SREK1</i>    | <i>MRPL35</i>  | <i>SIN3A</i>    |
| <i>SREK1IP1</i> | <i>MRPL36</i>  | <i>SIN3B</i>    |
| <i>SRFBP1</i>   | <i>MRPL38</i>  | <i>SIPA1</i>    |
| <i>SRGAP1</i>   | <i>MRPL42</i>  | <i>SIRPA</i>    |
| <i>SRI</i>      | <i>MRPL43</i>  | <i>SIRT1</i>    |
| <i>SRPK2</i>    | <i>MRPL44</i>  | <i>SIX1</i>     |
| <i>SRPRA</i>    | <i>MRPL46</i>  | <i>SIX4</i>     |
| <i>SRPRB</i>    | <i>MRPL50</i>  | <i>SIX6</i>     |
| <i>SRPX2</i>    | <i>MRPL51</i>  | <i>SKA3</i>     |
| <i>SRR</i>      | <i>MRPS10</i>  | <i>SKAP2</i>    |
| <i>SRRM2</i>    | <i>MRPS14</i>  | <i>SKI</i>      |
| <i>SRRM4</i>    | <i>MRPS16</i>  | <i>SKP1</i>     |
| <i>SRRT</i>     | <i>MRPS17</i>  | <i>SLAIN2</i>   |
| <i>SRSF1</i>    | <i>MRPS18C</i> | <i>SLAMF1</i>   |
| <i>SRSF10</i>   | <i>MRPS23</i>  | <i>SLAMF6</i>   |
| <i>SRSF11</i>   | <i>MRPS25</i>  | <i>SLAMF7</i>   |
| <i>SRSF2</i>    | <i>MRPS30</i>  | <i>SLAMF8</i>   |
| <i>SRSF3</i>    | <i>MRPS31</i>  | <i>SLBP</i>     |
| <i>SRSF7</i>    | <i>MRPS35</i>  | <i>SLC10A2</i>  |
| <i>SS18</i>     | <i>MRPS36</i>  | <i>SLC10A7</i>  |
| <i>SSBP2</i>    | <i>MRPS5</i>   | <i>SLC13A1</i>  |
| <i>SSBP3</i>    | <i>MRRF</i>    | <i>SLC14A1</i>  |
| <i>SSC4D</i>    | <i>MRS2</i>    | <i>SLC15A2</i>  |
| <i>SSH2</i>     | <i>MRTFA</i>   | <i>SLC16A6</i>  |
| <i>SSPN</i>     | <i>MRTO4</i>   | <i>SLC16A7</i>  |
| <i>SSR1</i>     | <i>MS4A15</i>  | <i>SLC17A2</i>  |
| <i>SSR3</i>     | <i>MS4A2</i>   | <i>SLC17A4</i>  |
| <i>SSR4P1</i>   | <i>MS4A3</i>   | <i>SLC17A6</i>  |
| <i>SSRP1</i>    | <i>MS4A4A</i>  | <i>SLC17A8</i>  |
| <i>SSX2</i>     | <i>MS4A6A</i>  | <i>SLC18A1</i>  |
| <i>SSX2IP</i>   | <i>MS4A7</i>   | <i>SLC19A1</i>  |
| <i>SSX3</i>     | <i>MSANTD2</i> | <i>SLC19A3</i>  |

|            |         |              |
|------------|---------|--------------|
| ST13       | MSANTD3 | SLC1A1       |
| ST3GAL6    | MSANTD4 | SLC1A2       |
| ST5        | MSC     | SLC1A5       |
| ST6GAL1    | MSH2    | SLC22A11     |
| ST6GAL2    | MSH3    | SLC22A15     |
| ST6GALNAC3 | MSH4    | SLC22A9      |
| ST6GALNAC5 | MSH6    | SLC23A2      |
| ST7L       | MSI2    | SLC24A1      |
| ST8SIA1    | MSL1    | SLC24A2      |
| ST8SIA3    | MSL2    | SLC24A4      |
| ST8SIA4    | MSL3    | SLC24A5      |
| STAC       | MSMO1   | SLC25A1      |
| STAM       | MSN     | SLC25A10     |
| STAMBP     | MSR1    | SLC25A11     |
| STAMBPL1   | MSRB2   | SLC25A12     |
| STARD4     | MSRB3   | SLC25A13     |
| STARD5     | MSTN    | SLC25A16     |
| STARD8     | MSX2    | SLC25A21     |
| STAT2      | MT1A    | SLC25A21-AS1 |
| STAT3      | MT1F    | SLC25A24     |
| STAT5A     | MTA3    | SLC25A26     |
| STAT5B     | MTBP    | SLC25A30     |
| STAU2      | MTCH2   | SLC25A34     |
| STC1       | MTDH    | SLC25A36     |
| STIL       | MTERF1  | SLC25A37     |
| STIM1      | MTERF2  | SLC25A39     |
| STIM2      | MTF2    | SLC25A4      |
| STK10      | MTFMT   | SLC25A43     |
| STK17B     | MTFR1   | SLC25A44     |
| STK24      | MTFR1L  | SLC25A45     |
| STK25      | MTG1    | SLC25A46     |
| STK32A     | MTHFD1L | SLC26A2      |
| STK33      | MTHFD2  | SLC26A7      |
| STK35      | MTHFD2L | SLC27A4      |
| STK38L     | MTHFS   | SLC28A1      |
| STK4       | MTM1    | SLC29A1      |
| STMN1      | MTMR1   | SLC2A10      |
| STMP1      | MTMR10  | SLC2A13      |
| STN1       | MTMR14  | SLC2A3       |
| STOML1     | MTMR2   | SLC2A4       |
| STOX2      | MTMR3   | SLC2A5       |
| STPG1      | MTMR6   | SLC30A1      |
| STPG4      | MTMR7   | SLC30A4      |
| STRAP      | MTMR8   | SLC30A6      |

|          |          |          |
|----------|----------|----------|
| STRN     | MTMR9    | SLC30A7  |
| STS      | MTO1     | SLC30A8  |
| STUM     | MTPAP    | SLC31A1  |
| STX12    | MTPN     | SLC34A1  |
| STX17    | MTR      | SLC34A2  |
| STX1B    | MTREX    | SLC35A4  |
| STX4     | MTRF1L   | SLC35A5  |
| STX6     | MTRNR2L1 | SLC35B4  |
| STX7     | MTRNR2L4 | SLC35D1  |
| STXBP4   | MTRR     | SLC35D2  |
| STYX     | MTSS1    | SLC35E1  |
| STYXL1   | MTTP     | SLC35E4  |
| SUB1     | MTURN    | SLC35F1  |
| SUCNR1   | MTUS1    | SLC35F5  |
| SUGT1    | MTX3     | SLC35F6  |
| SULT1B1  | MUC15    | SLC36A1  |
| SULT1C2  | MUC7     | SLC36A3  |
| SULT4A1  | MUCL1    | SLC37A4  |
| SUMO2    | MUCL3    | SLC38A1  |
| SUN2     | MUSK     | SLC38A7  |
| SUPT7L   | MVP      | SLC38A9  |
| SURF6    | MXD1     | SLC39A1  |
| SUSD1    | MXD3     | SLC39A10 |
| SUSD4    | MXD4     | SLC39A13 |
| SUSD5    | MXI1     | SLC39A14 |
| SUV39H2  | MXRA7    | SLC39A2  |
| SV2A     | MYADM    | SLC39A3  |
| SV2B     | MYB      | SLC39A6  |
| SV2C     | MYBL1    | SLC39A7  |
| SVIP     | MYBPC1   | SLC39A8  |
| SWAP70   | MYCBP    | SLC39A9  |
| SWT1     | MYCBP2   | SLC3A1   |
| SYAP1    | MYCT1    | SLC40A1  |
| SYBU     | MYD88    | SLC41A1  |
| SYCE2    | MYEF2    | SLC44A1  |
| SYDE2    | MYF5     | SLC44A5  |
| SYK      | MYH10    | SLC45A3  |
| SYNC     | MYH9     | SLC45A4  |
| SYNCRIP  | MYL12A   | SLC47A1  |
| SYNDIG1L | MYLIP    | SLC4A4   |
| SYNE4    | MYLK3    | SLC4A7   |
| SYNGR1   | MYNN     | SLC4A8   |
| SYNGR3   | MYO16    | SLC5A12  |
| SYNJ2    | MYO1A    | SLC5A3   |

|                 |                 |                 |
|-----------------|-----------------|-----------------|
| <i>SYNJ2BP</i>  | <i>MYO1B</i>    | <i>SLC5A7</i>   |
| <i>SYNPO</i>    | <i>MYO3A</i>    | <i>SLC6A1</i>   |
| <i>SYNPO2</i>   | <i>MYO5A</i>    | <i>SLC6A11</i>  |
| <i>SYNPO2L</i>  | <i>MYO5B</i>    | <i>SLC6A15</i>  |
| <i>SYNPR</i>    | <i>MYO5C</i>    | <i>SLC6A17</i>  |
| <i>SYS1</i>     | <i>MYO6</i>     | <i>SLC6A19</i>  |
| <i>SYT1</i>     | <i>MYO9A</i>    | <i>SLC6A3</i>   |
| <i>SYT10</i>    | <i>MYOC</i>     | <i>SLC6A8</i>   |
| <i>SYT11</i>    | <i>MYOCD</i>    | <i>SLC6A9</i>   |
| <i>SYT7</i>     | <i>MYOF</i>     | <i>SLC7A11</i>  |
| <i>SZRD1</i>    | <i>MYOM2</i>    | <i>SLC7A14</i>  |
| <i>SZT2</i>     | <i>MYORG</i>    | <i>SLC7A2</i>   |
| <i>TAB1</i>     | <i>MYOZ2</i>    | <i>SLC7A6</i>   |
| <i>TAB3</i>     | <i>MYOZ3</i>    | <i>SLC7A6OS</i> |
| <i>TACR1</i>    | <i>MYPN</i>     | <i>SLC7A9</i>   |
| <i>TADA2B</i>   | <i>MYPOP</i>    | <i>SLC8A1</i>   |
| <i>TAF11</i>    | <i>MYRIP</i>    | <i>SLC9A2</i>   |
| <i>TAF12</i>    | <i>MYSM1</i>    | <i>SLC9A3R2</i> |
| <i>TAF13</i>    | <i>MYT1</i>     | <i>SLC9A7</i>   |
| <i>TAF1A</i>    | <i>MYT1L</i>    | <i>SLC9B2</i>   |
| <i>TAF1D</i>    | <i>MYZAP</i>    | <i>SLCO1A2</i>  |
| <i>TAF3</i>     | <i>MZT1</i>     | <i>SLCO1C1</i>  |
| <i>TAF4B</i>    | <i>N4BP2</i>    | <i>SLCO2B1</i>  |
| <i>TAF5L</i>    | <i>N4BP2L1</i>  | <i>SLCO3A1</i>  |
| <i>TAF7L</i>    | <i>N4BP2L2</i>  | <i>SLCO5A1</i>  |
| <i>TAF9B</i>    | <i>N4BP3</i>    | <i>SLF1</i>     |
| <i>TAFA1</i>    | <i>N6AMT1</i>   | <i>SLF2</i>     |
| <i>TAFA2</i>    | <i>NAA11</i>    | <i>SLFN12L</i>  |
| <i>TAL1</i>     | <i>NAA15</i>    | <i>SLFN5</i>    |
| <i>TANC2</i>    | <i>NAA16</i>    | <i>SLFNL1</i>   |
| <i>TANGO6</i>   | <i>NAA25</i>    | <i>SLIT1</i>    |
| <i>TAOK1</i>    | <i>NAA30</i>    | <i>SLIT2</i>    |
| <i>TAPBP</i>    | <i>NAA35</i>    | <i>SLITRK5</i>  |
| <i>TARDBP</i>   | <i>NAA40</i>    | <i>SLK</i>      |
| <i>TARS2</i>    | <i>NAA50</i>    | <i>SLMAP</i>    |
| <i>TARSL2</i>   | <i>NAAA</i>     | <i>SLTM</i>     |
| <i>TASOR</i>    | <i>NAALAD2</i>  | <i>SLX4IP</i>   |
| <i>TATDN2</i>   | <i>NAALADL2</i> | <i>SMAD2</i>    |
| <i>TBC1D12</i>  | <i>NAB1</i>     | <i>SMAD5</i>    |
| <i>TBC1D19</i>  | <i>NABP1</i>    | <i>SMAD7</i>    |
| <i>TBC1D20</i>  | <i>NACC1</i>    | <i>SMAP1</i>    |
| <i>TBC1D22B</i> | <i>NADK</i>     | <i>SMARCA1</i>  |
| <i>TBC1D24</i>  | <i>NADK2</i>    | <i>SMARCA2</i>  |
| <i>TBC1D26</i>  | <i>NAF1</i>     | <i>SMARCA5</i>  |

|         |         |          |
|---------|---------|----------|
| TBC1D30 | NAGA    | SMARCAD1 |
| TBC1D4  | NAGPA   | SMARCD1  |
| TBC1D8B | NAIP    | SMC1A    |
| TBCEL   | NALCN   | SMC2     |
| TBL1X   | NAMPT   | SMC3     |
| TBL1XR1 | NANOG   | SMCHD1   |
| TBPL2   | NANOGNB | SMCR8    |
| TBR1    | NANOS1  | SMG1     |
| TBX1    | NAP1L1  | SMG7     |
| TBX15   | NAP1L2  | SMG9     |
| TBX18   | NAP1L4  | SMIM12   |
| TBX20   | NAP1L5  | SMIM13   |
| TBX3    | NAP1L6  | SMIM15   |
| TBXT    | NAPB    | SMIM17   |
| TCEA1   | NAPEPLD | SMIM19   |
| TCEAL1  | NAPG    | SMIM21   |
| TCERG1  | NARS    | SMIM30   |
| TCF12   | NARS2   | SMLR1    |
| TCF23   | NAT1    | SMNDC1   |
| TCF3    | NAT10   | SMOC1    |
| TCF4    | NBEA    | SMOX     |
| TCF7L2  | NBEAL1  | SMPD3    |
| TCFL5   | NBN     | SMTNL2   |
| TCHP    | NBPF1   | SMUG1    |
| TCIRG1  | NBPF3   | SMURF1   |
| TCL1A   | NBPF4   | SMYD2    |
| TCOF1   | NBR1    | SNAP23   |
| TCP10   | NCALD   | SNAP25   |
| TCTA    | NCAM1   | SNAP29   |
| TCTE1   | NCAM2   | SNAP47   |
| TCTN2   | NCAN    | SNAPC1   |
| TDG     | NCAPD3  | SNCB     |
| TDRD1   | NCAPG   | SND1     |
| TDRD7   | NCAPG2  | SNF8     |
| TDRKH   | NCAPH   | SNN      |
| TDRP    | NCBP1   | SNPH     |
| TEC     | NCBP2   | SNRNP200 |
| TECPR2  | NCEH1   | SNRNP48  |
| TECRL   | NCK1    | SNRPD1   |
| TEDC1   | NCKAP1  | SNRPD3   |
| TEK     | NCKAP1L | SNTB2    |
| TELO2   | NCKAP5  | SNX1     |
| TENM2   | NCKIPSD | SNX11    |
| TENM3   | NCL     | SNX13    |

|          |          |         |
|----------|----------|---------|
| TENM4    | NCMAP    | SNX19   |
| TENT4A   | NCOA1    | SNX2    |
| TENT5C   | NCOA2    | SNX24   |
| TEP1     | NCOA4    | SNX27   |
| TERF2    | NCOA5    | SNX29   |
| TERF2IP  | NCOA7    | SNX30   |
| TESMIN   | NCOR1    | SNX32   |
| TET2     | NCR3LG1  | SNX33   |
| TET3     | NCS1     | SNX4    |
| TEX10    | NDC1     | SOAT1   |
| TEX13B   | NDEL1    | SOBP    |
| TEX19    | NDFIP1   | SOCS1   |
| TEX2     | NDN      | SOCS3   |
| TEX22    | NDNF     | SOCS4   |
| TFAP2A   | NDP      | SOCS5   |
| TFAP2B   | NDRG1    | SOCS6   |
| TFB1M    | NDRG3    | SOD2    |
| TFCP2    | NDST3    | SOGA1   |
| TFCP2L1  | NDST4    | SORCS3  |
| TFEC     | NDUFA10  | SORD    |
| TFG      | NDUFA4L2 | SORL1   |
| TFR2     | NDUFA5   | SORT1   |
| TFRC     | NDUFA8   | SOS2    |
| TGFA     | NDUFA9   | SOSTDC1 |
| TGFB2    | NDUFAF4  | SOWAHC  |
| TGFBR1   | NDUFAF5  | SOX1    |
| TGFBR2   | NDUFAF7  | SOX10   |
| TGFBR3   | NDUFB4   | SOX11   |
| TGFBRAP1 | NDUFB5   | SOX3    |
| TGIF1    | NDUFB9   | SOX4    |
| TGIF2LX  | NDUFC1   | SP1     |
| TGIF2LY  | NDUFC2   | SP100   |
| TGOLN2   | NDUFS1   | SP140L  |
| TGS1     | NDUFV3   | SP3     |
| THAP1    | NEB      | SP4     |
| THAP2    | NEBL     | SP6     |
| THAP5    | NECAB1   | SPA17   |
| THAP6    | NECAB3   | SPAG5   |
| THAP8    | NECAP1   | SPAG6   |
| THBD     | NECTIN3  | SPAG9   |
| THBS1    | NEDD1    | SPARC   |
| THBS2    | NEDD4    | SPART   |
| THBS4    | NEDD9    | SPATA17 |
| THEM4    | NEFM     | SPATA2  |

|          |         |         |
|----------|---------|---------|
| THEMIS2  | NEGR1   | SPATA33 |
| THG1L    | NEIL3   | SPATA5  |
| THOP1    | NEK10   | SPATS2  |
| THRAP3   | NEK11   | SPATS2L |
| THRB     | NEK2    | SPCS1   |
| THSD7A   | NEK3    | SPCS2   |
| THSD7B   | NEK4    | SPCS3   |
| THUMPD1  | NEK5    | SPDL1   |
| TIAM1    | NEK7    | SPECC1  |
| TIFA     | NEK9    | SPEF2   |
| TIFAB    | NELL1   | SPEN    |
| TIGAR    | NEMF    | SPHAR   |
| TIGD2    | NEMP1   | SPIB    |
| TIGD5    | NEMP2   | SPIC    |
| TIGIT    | NENF    | SPICE1  |
| TIMD4    | NEO1    | SPIDR   |
| TIMELESS | NEPRO   | SPIN3   |
| TIMM22   | NET1    | SPIN4   |
| TIMM50   | NETO1   | SPINT1  |
| TIMP3    | NETO2   | SPNS1   |
| TIMP4    | NEU3    | SPOCK1  |
| TIPARP   | NEUROD1 | SPOCK2  |
| TIPRL    | NEUROD4 | SPOCK3  |
| TIRAP    | NEUROD6 | SPOUT1  |
| TK1      | NEUROG2 | SPPL2A  |
| TK2      | NEUROG3 | SPPL3   |
| TLCD2    | NEXMIF  | SPRED1  |
| TLCD4    | NF1     | SPRED2  |
| TLE3     | NFAM1   | SPRY1   |
| TLK2     | NFASC   | SPRY3   |
| TLL1     | NFAT5   | SPRY4   |
| TLL2     | NFATC1  | SPRYD3  |
| TLN1     | NFATC2  | SPRYD4  |
| TLN2     | NFATC4  | SPTB    |
| TLNRD1   | NFE2L3  | SPTBN1  |
| TLR10    | NFIA    | SPTBN2  |
| TLR2     | NFIB    | SPTBN5  |
| TLR8     | NFIL3   | SPTLC3  |
| TM2D2    | NFKB2   | SPTSSA  |
| TM2D3    | NFKBIA  | SQSTM1  |
| TMBIM1   | NFKBIZ  | SRC     |
| TMBIM6   | NFRKB   | SRD5A3  |
| TMC6     | NFS1    | SREBF2  |
| TMC7     | NFXL1   | SREK1   |



|          |           |            |
|----------|-----------|------------|
| TMCC1    | NFYA      | SREK1IP1   |
| TMCC3    | NFYC      | SRFBP1     |
| TMCO1    | NGDN      | SRGAP1     |
| TMCO4    | NGRN      | SRGAP3     |
| TMED3    | NHLH1     | SRGN       |
| TMED5    | NHLRC2    | SRI        |
| TMED7    | NHLRC3    | SRP68      |
| TMEM106B | NHS       | SRPK2      |
| TMEM11   | NIBAN1    | SRPRA      |
| TMEM120B | NID1      | SRPX2      |
| TMEM127  | NIF3L1    | SRR        |
| TMEM129  | NIFK      | SRRD       |
| TMEM132B | NIN       | SRSF1      |
| TMEM132C | NINL      | SRSF10     |
| TMEM139  | NIPA1     | SRSF11     |
| TMEM140  | NIPA2     | SRSF2      |
| TMEM141  | NIPAL1    | SRSF3      |
| TMEM151A | NIPAL2    | SRSF7      |
| TMEM151B | NIPAL3    | SRXN1      |
| TMEM154  | NIPAL4    | SSBP2      |
| TMEM158  | NIPBL     | SSBP3      |
| TMEM164  | NIPSNAP2  | SSC4D      |
| TMEM165  | NIPSNAP3A | SSH2       |
| TMEM167A | NIPSNAP3B | SSH3       |
| TMEM167B | NIT1      | SSPN       |
| TMEM168  | NKAIN1    | SSR1       |
| TMEM169  | NKAIN2    | SSR3       |
| TMEM170A | NKAP      | SSR4P1     |
| TMEM170B | NKD1      | SSRP1      |
| TMEM178B | NKIRAS1   | SSX2       |
| TMEM18   | NKIRAS2   | SSX2IP     |
| TMEM182  | NKRF      | SSX3       |
| TMEM185B | NKTR      | ST13       |
| TMEM186  | NKX2-1    | ST3GAL6    |
| TMEM19   | NKX2-2    | ST5        |
| TMEM198  | NKX2-4    | ST6GAL1    |
| TMEM200B | NKX3-1    | ST6GAL2    |
| TMEM201  | NKX3-2    | ST6GALNAC3 |
| TMEM207  | NKX6-2    | ST6GALNAC5 |
| TMEM209  | NLE1      | ST7L       |
| TMEM211  | NLGN1     | ST8SIA1    |
| TMEM212  | NLGN4X    | ST8SIA3    |
| TMEM214  | NLK       | ST8SIA4    |
| TMEM220  | NLN       | STAC       |

|           |        |          |
|-----------|--------|----------|
| TMEM230   | NLRP6  | STAG2    |
| TMEM231   | NLRP9  | STAM     |
| TMEM233   | NMD3   | STAM2    |
| TMEM235   | NME6   | STAMBP   |
| TMEM236   | NMNAT1 | STAMBPL1 |
| TMEM237   | NMNAT2 | STARD3NL |
| TMEM241   | NMT2   | STARD4   |
| TMEM245   | NNT    | STARD5   |
| TMEM246   | NOA1   | STARD8   |
| TMEM248   | NOC3L  | STAT1    |
| TMEM25    | NOCT   | STAT2    |
| TMEM251   | NOD2   | STAT3    |
| TMEM253   | NOL10  | STAT5A   |
| TMEM258   | NOL11  | STAT5B   |
| TMEM26    | NOL12  | STAT6    |
| TMEM263   | NOL4   | STAU2    |
| TMEM268   | NOL4L  | STC1     |
| TMEM33    | NOL7   | STIL     |
| TMEM39A   | NOL8   | STIM1    |
| TMEM40    | NOLC1  | STIM2    |
| TMEM41A   | NOM1   | STK10    |
| TMEM43    | NOP53  | STK17B   |
| TMEM52B   | NOP9   | STK24    |
| TMEM53    | NOS1   | STK25    |
| TMEM62    | NOS3   | STK32A   |
| TMEM63C   | NOTCH2 | STK33    |
| TMEM64    | NOTCH3 | STK35    |
| TMEM65    | NOTO   | STK38L   |
| TMEM74B   | NOVA1  | STK4     |
| TMEM86A   | NOVA2  | STMN1    |
| TMEM87A   | NOX4   | STMP1    |
| TMEM87B   | NPAP1  | STN1     |
| TMEM92    | NPAS3  | STOML1   |
| TMEM9B    | NPAS4  | STOX2    |
| TMLHE     | NPAT   | STPG1    |
| TMOD2     | NPC1   | STPG4    |
| TMOD3     | NPEPPS | STRAP    |
| TMPO      | NPFFR1 | STRN     |
| TMPPE     | NPHP1  | STS      |
| TMPRSS11B | NPHP3  | STUM     |
| TMPRSS4   | NPL    | STX12    |
| TMSB15A   | NPLOC4 | STX17    |
| TMSB15B   | NPM1   | STX1B    |
| TMTC1     | NPPC   | STX3     |

|                 |        |         |
|-----------------|--------|---------|
| TMTC2           | NPR3   | STX6    |
| TMUB1           | NPRL2  | STX7    |
| TNF             | NPTXR  | STXBP4  |
| TNFAIP2         | NPY    | STXBP5L |
| TNFAIP3         | NPY1R  | STYX    |
| TNFAIP8         | NPY2R  | STYXL1  |
| TNFAIP8L1       | NPY4R  | SUB1    |
| TNFRSF10A       | NPY5R  | SUCLG2  |
| TNFRSF10C       | NQO2   | SUCNR1  |
| TNFRSF11B       | NR0B1  | SUGT1   |
| TNFRSF13C       | NR1D2  | SULT1B1 |
| TNFRSF14        | NR1H4  | SULT1C2 |
| TNFRSF19        | NR2C1  | SULT1E1 |
| TNFRSF1B        | NR2C2  | SULT4A1 |
| TNFRSF8         | NR2F2  | SUN2    |
| TNFSF10         | NR4A2  | SUPT20H |
| TNFSF12-TNFSF13 | NR5A2  | SUPT3H  |
| TNFSF13         | NR6A1  | SUPT7L  |
| TNFSF13B        | NRAS   | SURF6   |
| TNFSF15         | NRBP2  | SUSD1   |
| TNFSF4          | NRCAM  | SUSD5   |
| TNIK            | NREP   | SUV39H2 |
| TNIP1           | NRF1   | SV2A    |
| TNKS            | NRG1   | SV2B    |
| TNKS2           | NRG2   | SV2C    |
| TNN             | NRG3   | SVIP    |
| TNNI1           | NRG4   | SWAP70  |
| TNPO1           | NRK    | SWT1    |
| TNR             | NRL    | SYAP1   |
| TNRC6A          | NRN1   | SYBU    |
| TNRC6B          | NRP1   | SYCE2   |
| TNRC6C          | NRP2   | SYDE2   |
| TNS3            | NRXN1  | SYK     |
| TNS4            | NRXN3  | SYNC    |
| TOGARAM2        | NSD1   | SYNCRIP |
| TOLLIP          | NSD2   | SYNGR1  |
| TOM1            | NSD3   | SYNGR3  |
| TOM1L1          | NSDHL  | SYNJ2   |
| TOMM20          | NSF    | SYNJ2BP |
| TOMM34          | NSL1   | SYNPO   |
| TOMM7           | NSMAF  | SYNPO2  |
| TOP3A           | NSMCE2 | SYNPO2L |
| TOPBP1          | NSRP1  | SYNPR   |
| TOR1AIP1        | NSUN2  | SYS1    |

|          |              |        |
|----------|--------------|--------|
| TOR1AIP2 | NSUN3        | SYT1   |
| TOX      | NSUN4        | SYT10  |
| TOX3     | NSUN5        | SYT11  |
| TP53     | NSUN7        | SYT13  |
| TP53BP2  | NT5C1A       | SYT7   |
| TP53INP1 | NT5C1B       | SYTL4  |
| TP53INP2 | NT5C1B-RDH14 | SZRD1  |
| TP63     | NT5C2        | SZT2   |
| TPD52    | NT5DC1       | TAB3   |
| TPD52L1  | NT5DC3       | TACO1  |
| TPGS2    | NT5DC4       | TACR1  |
| TPH1     | NTM          | TADA2B |
| TPK1     | NTN4         | TAF10  |
| TPM3     | NTN5         | TAF11  |
| TPPP3    | NTNG1        | TAF12  |
| TPRA1    | NTNG2        | TAF13  |
| TPRG1    | NTPCR        | TAF1A  |
| TPRG1L   | NTRK2        | TAF1D  |
| TPT1     | NTRK3        | TAF3   |
| TRA2B    | NUAK1        | TAF4   |
| TRABD2A  | NUBPL        | TAF4B  |
| TRABD2B  | NUCB1        | TAF5L  |
| TRAF2    | NUCB2        | TAF7L  |
| TRAF3IP1 | NUCKS1       | TAF8   |
| TRAF3IP2 | NUDCD1       | TAF9B  |
| TRAF4    | NUDCD2       | TAF1A  |
| TRAF5    | NUDCD3       | TAF1B  |
| TRAF6    | NUDT11       | TAF1C  |
| TRAK1    | NUDT12       | TAF1D  |
| TRAM1    | NUDT15       | TAF3   |
| TRAM2    | NUDT16       | TAF4   |
| TRAP1    | NUDT19       | TAF4B  |
| TRAPPC10 | NUDT21       | TAF5L  |
| TRAPPC6B | NUDT3        | TAF7L  |
| TRAPPC9  | NUDT4        | TAF8   |
| TRARG1   | NUDT5        | TAF9B  |
| TRAT1    | NUDT9        | TAF1A  |
| TRDMT1   | NUF2         | TAF1B  |
| TREML2   | NUFIP1       | TAF1C  |
| TRIM14   | NUFIP2       | TAF1D  |
| TRIM2    | NUGGC        | TAF3   |
| TRIM24   | NUMBL        | TAF4   |
| TRIM28   | NUP133       | TAF4B  |
| TRIM35   | NUP160       | TAF5L  |
|          |              | TAF7L  |
|          |              | TAF8   |
|          |              | TAF9B  |
|          |              | TAF1A  |
|          |              | TAF1B  |
|          |              | TAF1C  |
|          |              | TAF1D  |
|          |              | TAF3   |
|          |              | TAF4   |
|          |              | TAF4B  |
|          |              | TAF5L  |
|          |              | TAF7L  |
|          |              | TAF8   |
|          |              | TAF9B  |
|          |              | TAF1A  |
|          |              | TAF1B  |
|          |              | TAF1C  |
|          |              | TAF1D  |
|          |              | TAF3   |
|          |              | TAF4   |
|          |              | TAF4B  |
|          |              | TAF5L  |
|          |              | TAF7L  |
|          |              | TAF8   |
|          |              | TAF9B  |
|          |              | TAF1A  |
|          |              | TAF1B  |
|          |              | TAF1C  |
|          |              | TAF1D  |
|          |              | TAF3   |
|          |              | TAF4   |
|          |              | TAF4B  |
|          |              | TAF5L  |
|          |              | TAF7L  |
|          |              | TAF8   |
|          |              | TAF9B  |
|          |              | TAF1A  |
|          |              | TAF1B  |
|          |              | TAF1C  |
|          |              | TAF1D  |
|          |              | TAF3   |
|          |              | TAF4   |
|          |              | TAF4B  |
|          |              | TAF5L  |
|          |              | TAF7L  |
|          |              | TAF8   |
|          |              | TAF9B  |
|          |              | TAF1A  |
|          |              | TAF1B  |
|          |              | TAF1C  |
|          |              | TAF1D  |
|          |              | TAF3   |
|          |              | TAF4   |
|          |              | TAF4B  |
|          |              | TAF5L  |
|          |              | TAF7L  |
|          |              | TAF8   |
|          |              | TAF9B  |
|          |              | TAF1A  |
|          |              | TAF1B  |
|          |              | TAF1C  |
|          |              | TAF1D  |
|          |              | TAF3   |
|          |              | TAF4   |
|          |              | TAF4B  |
|          |              | TAF5L  |
|          |              | TAF7L  |
|          |              | TAF8   |
|          |              | TAF9B  |
|          |              | TAF1A  |
|          |              | TAF1B  |
|          |              | TAF1C  |
|          |              | TAF1D  |
|          |              | TAF3   |
|          |              | TAF4   |
|          |              | TAF4B  |
|          |              | TAF5L  |
|          |              | TAF7L  |
|          |              | TAF8   |
|          |              | TAF9B  |
|          |              | TAF1A  |
|          |              | TAF1B  |
|          |              | TAF1C  |
|          |              | TAF1D  |
|          |              | TAF3   |
|          |              | TAF4   |
|          |              | TAF4B  |
|          |              | TAF5L  |
|          |              | TAF7L  |
|          |              | TAF8   |
|          |              | TAF9B  |
|          |              | TAF1A  |
|          |              | TAF1B  |
|          |              | TAF1C  |
|          |              | TAF1D  |
|          |              | TAF3   |
|          |              | TAF4   |
|          |              | TAF4B  |
|          |              | TAF5L  |
|          |              | TAF7L  |
|          |              | TAF8   |
|          |              | TAF9B  |
|          |              | TAF1A  |
|          |              | TAF1B  |
|          |              | TAF1C  |
|          |              | TAF1D  |
|          |              | TAF3   |
|          |              | TAF4   |
|          |              | TAF4B  |
|          |              | TAF5L  |
|          |              | TAF7L  |
|          |              | TAF8   |
|          |              | TAF9B  |
|          |              | TAF1A  |
|          |              | TAF1B  |
|          |              | TAF1C  |
|          |              | TAF1D  |
|          |              | TAF3   |
|          |              | TAF4   |
|          |              | TAF4B  |
|          |              | TAF5L  |
|          |              | TAF7L  |
|          |              | TAF8   |
|          |              | TAF9B  |
|          |              | TAF1A  |
|          |              | TAF1B  |
|          |              | TAF1C  |
|          |              | TAF1D  |
|          |              | TAF3   |
|          |              | TAF4   |
|          |              | TAF4B  |
|          |              | TAF5L  |
|          |              | TAF7L  |
|          |              | TAF8   |
|          |              | TAF9B  |
|          |              | TAF1A  |
|          |              | TAF1B  |
|          |              | TAF1C  |
|          |              | TAF1D  |
|          |              | TAF3   |
|          |              | TAF4   |
|          |              | TAF4B  |
|          |              | TAF5L  |
|          |              | TAF7L  |
|          |              | TAF8   |
|          |              | TAF9B  |
|          |              | TAF1A  |
|          |              | TAF1B  |
|          |              | TAF1C  |
|          |              | TAF1D  |
|          |              | TAF3   |
|          |              | TAF4   |
|          |              | TAF4B  |
|          |              | TAF5L  |
|          |              | TAF7L  |
|          |              | TAF8   |
|          |              | TAF9B  |
|          |              | TAF1A  |
|          |              | TAF1B  |
|          |              | TAF1C  |
|          |              | TAF1D  |
|          |              | TAF3   |
|          |              | TAF4   |
|          |              | TAF4B  |
|          |              | TAF5L  |
|          |              | TAF7L  |
|          |              | TAF8   |
|          |              | TAF9B  |
|          |              | TAF1A  |
|          |              | TAF1B  |
|          |              | TAF1C  |
|          |              | TAF1D  |
|          |              | TAF3   |
|          |              | TAF4   |
|          |              | TAF4B  |
|          |              | TAF5L  |
|          |              | TAF7L  |
|          |              | TAF8   |
|          |              | TAF9B  |
|          |              | TAF1A  |
|          |              | TAF1B  |
|          |              | TAF1C  |
|          |              | TAF1D  |
|          |              | TAF3   |
|          |              | TAF4   |
|          |              | TAF4B  |
|          |              | TAF5L  |
|          |              | TAF7L  |
|          |              | TAF8   |
|          |              | TAF9B  |
|          |              | TAF1A  |
|          |              | TAF1B  |
|          |              | TAF1C  |
|          |              | TAF1D  |
|          |              | TAF3   |
|          |              | TAF4   |
|          |              | TAF4B  |
|          |              | TAF5L  |
|          |              | TAF7L  |
|          |              | TAF8   |
|          |              | TAF9B  |
|          |              | TAF1A  |
|          |              | TAF1B  |
|          |              | TAF1C  |
|          |              | TAF1D  |
|          |              | TAF3   |
|          |              | TAF4   |
|          |              | TAF4B  |
|          |              | TAF5L  |
|          |              | TAF7L  |
|          |              | TAF8   |
|          |              | TAF9B  |
|          |              | TAF1A  |
|          |              | TAF1B  |
|          |              | TAF1C  |
|          |              | TAF1D  |
|          |              | TAF3   |
|          |              | TAF4   |
|          |              | TAF4B  |
|          |              | TAF5L  |
|          |              | TAF7L  |
|          |              | TAF8   |
|          |              | TAF9B  |
|          |              | TAF1A  |
|          |              | TAF1B  |
|          |              | TAF1C  |
|          |              | TAF1D  |
|          |              | TAF3   |
|          |              | TAF4   |
|          |              | TAF4B  |
|          |              | TAF5L  |
|          |              | TAF7L  |
|          |              | TAF8   |
|          |              | TAF9B  |
|          |              | TAF1A  |
|          |              | TAF1B  |
|          |              | TAF1C  |
|          |              | TAF1D  |
|          |              | TAF3   |
|          |              | TAF4   |
|          |              | TAF4B  |
|          |              | TAF5L  |
|          |              | TAF7L  |
|          |              | TAF8   |
|          |              | TAF9B  |
|          |              | TAF1A  |
|          |              | TAF1B  |
|          |              | TAF1C  |
|          |              | TAF1D  |
|          |              | TAF3   |
|          |              | TAF4   |
|          |              | TAF4B  |
|          |              | TAF5L  |
|          |              | TAF7L  |
|          |              | TAF8   |
|          |              | TAF9B  |
|          |              | TAF1A  |
|          |              | TAF1B  |
|          |              | TAF1C  |
|          |              | TAF1D  |
|          |              | TAF3   |
|          |              | TAF4   |
|          |              | TAF4B  |
|          |              | TAF5L  |
|          |              | TAF7L  |
|          |              | TAF8   |
|          |              | TAF9B  |
|          |              | TAF1A  |
|          |              | TAF1B  |
|          |              | TAF1C  |
|          |              | TAF1D  |
|          |              | TAF3   |
|          |              | TAF4   |
|          |              | TAF4B  |
|          |              | TAF5L  |
|          |              | TAF7L  |
|          |              | TAF8   |
|          |              | TAF9B  |
|          |              | TAF1A  |
|          |              | TAF1B  |
|          |              | TAF1C  |
|          |              | TAF1D  |
|          |              | TAF3   |
|          |              | TAF4   |
|          |              | TAF4B  |
|          |              | TAF5L  |
|          |              | TAF7L  |
|          |              | TAF8   |
|          |              | TAF9B  |
|          |              | TAF1A  |
|          |              | TAF1B  |
|          |              | TAF1C  |
|          |              | TAF1D  |
|          |              | TAF3   |
|          |              | TAF4   |
|          |              | TAF4B  |
|          |              | TAF5L  |
|          |              | TAF7L  |
|          |              | TAF8   |
|          |              | TAF9B  |
|          |              | TAF1A  |
|          |              | TAF1B  |
|          |              | TAF1C  |
|          |              | TAF1D  |
|          |              | TAF3   |
|          |              | TAF4   |
|          |              | TAF4B  |
|          |              | TAF5L  |
|          |              | TAF7L  |
|          |              | TAF8   |
|          |              | TAF9B  |
|          |              | TAF1A  |
|          |              | TAF1B  |
|          |              | TAF1C  |
|          |              | TAF1D  |
|          |              | TAF3   |
|          |              | TAF4   |
|          |              | TAF4B  |
|          |              | TAF5L  |
|          |              | TAF7L  |
|          |              | TAF8   |
|          |              | TAF9B  |
|          |              | TAF1A  |
|          |              | TAF1B  |
|          |              | TAF1C  |
|          |              | TAF1D  |
|          |              | TAF3   |
|          |              | TAF4   |
|          |              | TAF4B  |
|          |              | TAF5L  |
|          |              | TAF7L  |
|          |              | TAF8   |
|          |              | TAF9B  |
|          |              | TAF1A  |
|          |              | TAF1B  |
|          |              | TAF1C  |
|          |              | TAF1D  |
|          |              | TAF3   |
|          |              | TAF4   |
|          |              | TAF4B  |
|          |              | TAF5L  |
|          |              | TAF7L  |
|          |              | TAF8   |
|          |              | TAF9B  |
|          |              | TAF1A  |
|          |              | TAF1B  |
|          |              | TAF1C  |
|          |              | TAF1D  |
|          |              | TAF3   |
|          |              | TAF4   |
|          |              | TAF4B  |
|          |              | TAF5L  |
|          |              | TAF7L  |
|          |              | TAF8   |
|          |              | TAF9B  |
|          |              | TAF1A  |
|          |              | TAF1B  |
|          |              | TAF1C  |
|          |              | TAF1D  |
|          |              | TAF3   |
|          |              | TAF4   |
|          |              | TAF4B  |
|          |              | TAF5L  |
|          |              | TAF7L  |
|          |              | TAF8   |
|          |              | TAF9B  |
|          |              | TAF1A  |
|          |              | TAF1B  |
|          |              | TAF1C  |
|          |              | TAF1D  |
|          |              | TAF3   |
|          |              | TAF4   |
|          |              | TAF4B  |
|          |              | TAF5L  |
|          |              | TAF7L  |
|          |              | TAF8   |
|          |              | TAF9B  |
|          |              | TAF1A  |
|          |              | TAF1B  |
|          |              | TAF1C  |
|          |              | TAF1D  |
|          |              | TAF3   |
|          |              | TAF4   |
|          |              | TAF4B  |
|          |              | TAF5L  |
|          |              | TAF7L  |
|          |              | TAF8   |
|          |              | TAF9B  |
|          |              | TAF1A  |
|          |              | TAF1B  |
|          |              | TAF1C  |
|          |              | TAF1D  |
|          |              | TAF3   |
|          |              | TAF4   |
|          |              | TAF4B  |
|          |              | TAF5L  |
|          |              | TAF7L  |
|          |              | TAF8   |
|          |              | TAF9B  |
|          |              | TAF1A  |
|          |              | TAF1B  |
|          |              | TAF1C  |
|          |              | TAF1D  |
|          |              | TAF3   |
|          |              | TAF4   |
|          |              | TAF4B  |
|          |              | TAF5L  |
|          |              | TAF7L  |
|          |              | TAF8   |
|          |              | TAF9B  |
|          |              | TAF1A  |
|          |              | TAF1B  |
|          |              | TAF1C  |
|          |              | TAF1D  |
|          |              | TAF3   |
|          |              | TAF4   |
|          |              | TAF4B  |
|          |              | TAF5L  |
|          |              | TAF7L  |
|          |              | TAF8   |
|          |              | TAF9B  |
|          |              | TAF1A  |
|          |              | TAF1B  |
|          |              | TAF1C  |
|          |              | TAF1D  |
|          |              | TAF3   |
|          |              | TAF4   |
|          |              | TAF4B  |
|          |              | TAF5L  |
|          |              | TAF7L  |
|          |              | TAF8   |
|          |              | TAF9B  |
|          |              | TAF1A  |
|          |              | TAF1B  |
|          |              | TAF1C  |
|          |              | TAF1D  |
|          |              | TAF3   |
|          |              | TAF4   |
|          |              | TAF4B  |
|          |              | TAF5L  |
|          |              | TAF7L  |
|          |              | TAF8   |
|          |              | TAF9B  |
|          |              | TAF1A  |
|          |              | TAF1B  |
|          |              | TAF1C  |
|          |              | TAF1D  |
|          |              | TAF3   |
|          |              | TAF4   |
|          |              | TAF4B  |
|          |              | TAF5L  |
|          |              | TAF7L  |
|          |              | TAF8   |
|          |              | TAF9B  |
|          |              | TAF1A  |
|          |              | TAF1B  |
|          |              | TAF1C  |
|          |              | TAF1D  |
|          |              | TAF3   |
|          |              | TAF4   |
|          |              | TAF4B  |
|          |              | TAF5L  |
|          |              | TAF7L  |
|          |              | TAF8   |
|          |              | TAF9B  |
|          |              | TAF1A  |
|          |              | TAF1B  |
|          |              | TAF1C  |
|          |              | TAF1D  |
|          |              | TAF3   |
|          |              | TAF4   |
|          |              | TAF4B  |
|          |              | TAF5L  |
|          |              | TAF7L  |
|          |              | TAF8   |
|          |              | TAF9B  |
|          |              | TAF1A  |
|          |              | TAF1B  |
|          |              | TAF1C  |
|          |              | TAF1D  |
|          |              | TAF3   |
|          |              | TAF4   |
|          |              | TAF4B  |
|          |              | TAF5L  |
|          |              | TAF7L  |
|          |              | TAF8   |
|          |              | TAF9B  |
|          |              | TAF1A  |
|          |              | TAF1B  |
|          |              | TAF1C  |
|          |              | TAF1D  |
|          |              | TAF3   |
|          |              | TAF4   |
|          |              | TAF4B  |
|          |              | TAF5L  |
|          |              | TAF7L  |
|          |              | TAF8   |
|          |              | TAF9B  |
|          |              | TAF1A  |
|          |              | TAF1B  |
|          |              | TAF1C  |
|          |              | TAF1D  |
|          |              | TAF3   |
|          |              | TAF4   |
|          |              | TAF4B  |
|          |              | TAF5L  |
|          |              | TAF7L  |
|          |              | TAF8   |
|          |              | TAF9B  |
|          |              | TAF1A  |
|          |              | TAF1B  |
|          |              | TAF1C  |
|          |              | TAF1D  |
|          |              | TAF3   |
|          |              | TAF4   |
|          |              | TAF4B  |
|          |              | TAF5L  |
|          |              | TAF7L  |
|          |              | TAF8   |
|          |              | TAF9B  |
|          |              | TAF1A  |
|          |              | TAF1B  |
|          |              | TAF1C  |
|          |              | TAF1D  |
|          |              | TAF3   |
|          |              | TAF4   |
|          |              | TAF4B  |
|          |              | TAF5L  |
|          |              | TAF7L  |
|          |              | TAF8   |
|          |              | TAF9B  |
|          |              | TAF1A  |

|         |         |         |
|---------|---------|---------|
| TRIM36  | NUP205  | TBC1D24 |
| TRIM4   | NUP214  | TBC1D26 |
| TRIM44  | NUP35   | TBC1D30 |
| TRIM47  | NUP37   | TBC1D4  |
| TRIM5   | NUP42   | TBC1D8B |
| TRIM58  | NUP43   | TBC1D9  |
| TRIM62  | NUP50   | TBCA    |
| TRIM64B | NUP58   | TBCEL   |
| TRIM71  | NUP62   | TBK1    |
| TRIM72  | NUP62CL | TBL1X   |
| TRIM74  | NUP88   | TBL1XR1 |
| TRIM9   | NUP93   | TBPL2   |
| TRIP13  | NUP98   | TBR1    |
| TRIP4   | NUS1    | TBX15   |
| TRIQQ   | NUTF2   | TBX18   |
| TRMO    | NUTM2D  | TBX20   |
| TRMT10B | NVL     | TBX3    |
| TRMT2A  | NWD1    | TBXT    |
| TRMT5   | NWD2    | TCEA1   |
| TRMT6   | NXF1    | TCEAL1  |
| TRMT9B  | NXNL2   | TCEAL8  |
| TRNP1   | NXPH1   | TCF12   |
| TROAP   | NXPH2   | TCF21   |
| TRPA1   | NXPH3   | TCF23   |
| TRPC1   | NXT2    | TCF24   |
| TRPC3   | NYAP1   | TCF3    |
| TRPC4   | NYNRIN  | TCF4    |
| TRPC4AP | OARD1   | TCF7L2  |
| TRPC5   | OAS1    | TCFL5   |
| TRPM3   | OAS2    | TCHP    |
| TRPS1   | OAS3    | TCL1A   |
| TRPV2   | OASL    | TCP10   |
| TRUB1   | OAT     | TCTA    |
| TSC1    | OCIAD1  | TCTE1   |
| TSC22D2 | OCIAD2  | TCTN2   |
| TSC22D3 | OCLN    | TDG     |
| TSEN2   | OCRL    | TDRD1   |
| TSEN54  | ODAPH   | TDRD10  |
| TSFM    | ODF2    | TDRD9   |
| TSHZ2   | ODF2L   | TDRKH   |
| TSKU    | ODF4    | TDRP    |
| TSNARE1 | OGA     | TEC     |
| TSPAN12 | OGFOD1  | TECPR1  |
| TSPAN13 | OGFOD3  | TECPR2  |

|         |         |          |
|---------|---------|----------|
| TSPAN14 | OGFRL1  | TECRL    |
| TSPAN15 | OIP5    | TECTB    |
| TSPAN17 | OIT3    | TEDC1    |
| TSPAN2  | OLA1    | TEK      |
| TSPAN3  | OLFM1   | TEKT1    |
| TSPAN5  | OLFM2   | TELO2    |
| TSPAN7  | OLFM3   | TENM1    |
| TSPYL1  | OLFM4   | TENM2    |
| TSPYL5  | OLFML2A | TENM4    |
| TSSK1B  | OLFML3  | TENT4A   |
| TSTD2   | OLIG2   | TEPP     |
| TTBK2   | OLIG3   | TERF2    |
| TTC13   | OLR1    | TERF2IP  |
| TTC14   | OMA1    | TESMIN   |
| TTC28   | OMD     | TET2     |
| TTC30B  | OMG     | TET3     |
| TTC31   | OMP     | TEX19    |
| TTC37   | ONECUT1 | TEX2     |
| TTC39A  | ONECUT2 | TEX22    |
| TTC39B  | ONECUT3 | TEX261   |
| TTC39C  | OPA3    | TFAP2A   |
| TTC4    | OPALIN  | TFB1M    |
| TTC7A   | OPCML   | TFCP2    |
| TTC8    | OPHN1   | TFCP2L1  |
| TTC9    | OPN1MW2 | TFEC     |
| TTF2    | OPN1SW  | TFG      |
| TTI2    | OPN3    | TFR2     |
| TTL     | OPN4    | TFRC     |
| TTLL11  | OPRK1   | TGFA     |
| TTLL12  | OPRM1   | TGFB2    |
| TTLL4   | OR1L8   | TGFBR1   |
| TTLL7   | OR2A4   | TGFBR2   |
| TTPAL   | OR2H1   | TGFBR3   |
| TTR     | OR2L13  | TGFBRAP1 |
| TUB     | OR52I2  | TGIF1    |
| TUBA1A  | OR6C4   | TGIF2LX  |
| TUBB6   | OR7A17  | TGIF2LY  |
| TUBGCP3 | OR7A5   | TGOLN2   |
| TULP4   | OR7D2   | TGS1     |
| TVP23A  | OR9Q1   | THAP1    |
| TWF1    | ORC2    | THAP2    |
| TWISTNB | ORC4    | THAP6    |
| TWNK    | ORC5    | THAP8    |
| TXK     | ORMDL1  | THBD     |

|         |           |          |
|---------|-----------|----------|
| TXLNA   | OSBP      | THBS1    |
| TXLNB   | OSBP2     | THBS2    |
| TXLNG   | OSBPL10   | THEM4    |
| TXN     | OSBPL11   | THEMIS2  |
| TXNDC12 | OSBPL1A   | THG1L    |
| TXNDC16 | OSBPL2    | THOC5    |
| TXNRD2  | OSBPL3    | THRB     |
| TYR     | OSBPL6    | THSD7A   |
| TYRP1   | OSBPL7    | THSD7B   |
| TYW3    | OSBPL8    | THUMPD1  |
| UBA1    | OSCP1     | TIAM1    |
| UBA2    | OSER1     | TICAM1   |
| UBA6    | OSGIN2    | TIFA     |
| UBAC1   | OSMR      | TIFAB    |
| UBASH3B | OSTC      | TIGAR    |
| UBD     | OSTF1     | TIGD2    |
| UBE2D1  | OSTM1     | TIGD5    |
| UBE2D3  | OTOGL     | TIGD6    |
| UBE2E1  | OTOR      | TIGD7    |
| UBE2E2  | OTUB1     | TIGIT    |
| UBE2E3  | OTUD1     | TIMD4    |
| UBE2G2  | OTUD3     | TIMELESS |
| UBE2I   | OTUD4     | TIMM22   |
| UBE2J1  | OTUD6B    | TIMMDC1  |
| UBE2J2  | OTUD7A    | TIMP3    |
| UBE2K   | OTULIN    | TIMP4    |
| UBE2N   | OTULINL   | TIPARP   |
| UBE2O   | OVCH1-AS1 | TIPRL    |
| UBE2QL1 | OVOL1     | TIRAP    |
| UBE2T   | OXA1L     | TK1      |
| UBE2V2  | OXGR1     | TK2      |
| UBE2W   | OXNAD1    | TKFC     |
| UBE3B   | OXR1      | TLCD2    |
| UBE4A   | OXSR1     | TLCD3A   |
| UBE4B   | OXTR      | TLCD4    |
| UBIAD1  | P2RX1     | TLE3     |
| UBN2    | P2RX5     | TLE4     |
| UBOX5   | P2RX7     | TLK2     |
| UBP1    | P2RY1     | TLL1     |
| UBR5    | P2RY10    | TLL2     |
| UBR7    | P2RY12    | TLN1     |
| UBTD2   | P2RY13    | TLN2     |
| UBXN10  | P2RY14    | TLNRD1   |
| UBXN2A  | P2RY2     | TLR2     |

|              |             |          |
|--------------|-------------|----------|
| UBXN2B       | P2RY8       | TLR6     |
| UBXN7        | P3H2        | TLR8     |
| UCHL5        | P4HA2       | TM2D2    |
| UCMA         | P4HB        | TM2D3    |
| UCP2         | PA2G4       | TM4SF18  |
| UCP3         | PABPC1      | TM9SF2   |
| UEVLD        | PABPC1L2A   | TM9SF3   |
| UFL1         | PABPC1L2B   | TMA16    |
| UGCG         | PABPC3      | TMBIM1   |
| UGT2B15      | PABPC4L     | TMBIM6   |
| UGT3A1       | PABPC5      | TMC2     |
| UGT8         | PACC1       | TMC5     |
| UHMK1        | PACRGL      | TMC6     |
| UHRF1BP1L    | PACS1       | TMC7     |
| UHRF2        | PACS2       | TMCC1    |
| ULK2         | PACSN2      | TMCC3    |
| ULK3         | PADI2       | TMCO1    |
| UMPS         | PAFAH1B1    | TMCO4    |
| UNC119B      | PAFAH1B2    | TMCO5A   |
| UNC13A       | PAG1        | TMED3    |
| UNC13B       | PAH         | TMED5    |
| UNC5B        | PAICS       | TMED7    |
| UNC5C        | PAIP1       | TMED9    |
| UNC5D        | PAIP2B      | TMEM104  |
| UNC79        | PAK1        | TMEM106B |
| UNKL         | PAK1IP1     | TMEM120B |
| UPF1         | PAK2        | TMEM121B |
| UPF3B        | PAK3        | TMEM127  |
| UPP2         | PALLD       | TMEM129  |
| UQCC3        | PALM2-AKAP2 | TMEM132B |
| UQCR10       | PALMD       | TMEM132C |
| UQCR11       | PAM         | TMEM135  |
| UQCRB        | PANK1       | TMEM139  |
| UQCRES1      | PANK2       | TMEM140  |
| URB1         | PANK3       | TMEM141  |
| URGCP-MRPS24 | PANK4       | TMEM151A |
| URI1         | PANX1       | TMEM151B |
| UROD         | PAOX        | TMEM154  |
| UROS         | PAPLN       | TMEM158  |
| USB1         | PAPOLA      | TMEM164  |
| USF2         | PAPOLB      | TMEM165  |
| USF3         | PAPOLG      | TMEM167A |
| USP12        | PAPPA       | TMEM167B |
| USP13        | PAPPA2      | TMEM168  |



|        |            |          |
|--------|------------|----------|
| USP14  | PAPSS2     | TMEM169  |
| USP15  | PAQR3      | TMEM170A |
| USP18  | PAQR5      | TMEM170B |
| USP21  | PAQR7      | TMEM178B |
| USP22  | PAQR8      | TMEM18   |
| USP3   | PAQR9      | TMEM182  |
| USP30  | PARD3B     | TMEM183A |
| USP31  | PARD6B     | TMEM184C |
| USP32  | PARD6G     | TMEM185B |
| USP35  | PARD6G-AS1 | TMEM186  |
| USP36  | PARK7      | TMEM19   |
| USP39  | PARL       | TMEM196  |
| USP4   | PARN       | TMEM198  |
| USP40  | PARP1      | TMEM199  |
| USP46  | PARP11     | TMEM200C |
| USP47  | PARP15     | TMEM201  |
| USP48  | PARP16     | TMEM207  |
| USP49  | PARP3      | TMEM209  |
| USP5   | PARP4      | TMEM211  |
| USP51  | PARP9      | TMEM212  |
| USP53  | PARPBP     | TMEM214  |
| USP54  | PARVA      | TMEM215  |
| USP6   | PASK       | TMEM220  |
| USP6NL | PATE1      | TMEM229A |
| USP9X  | PATE2      | TMEM229B |
| USP9Y  | PATJ       | TMEM230  |
| UST    | PATL1      | TMEM231  |
| UTP14C | PATZ1      | TMEM233  |
| UTP15  | PAWR       | TMEM235  |
| UTP25  | PAX1       | TMEM236  |
| UTP6   | PAX3       | TMEM237  |
| UTS2B  | PAX6       | TMEM241  |
| UTY    | PAXBP1     | TMEM245  |
| VAMP3  | PBK        | TMEM246  |
| VAMP4  | PBOV1      | TMEM248  |
| VAMP8  | PBRM1      | TMEM25   |
| VANGL1 | PBX1       | TMEM251  |
| VANGL2 | PBX3       | TMEM253  |
| VAPA   | PCBP1      | TMEM258  |
| VAPB   | PCCB       | TMEM26   |
| VASH1  | PCDH10     | TMEM263  |
| VASH2  | PCDH11X    | TMEM33   |
| VAT1L  | PCDH11Y    | TMEM39A  |
| VAV2   | PCDH12     | TMEM41A  |

|          |          |                 |
|----------|----------|-----------------|
| VAV3     | PCDH15   | TMEM43          |
| VAX1     | PCDH17   | TMEM44          |
| VCAM1    | PCDH18   | TMEM52B         |
| VCAN     | PCDH19   | TMEM53          |
| VCL      | PCDH20   | TMEM62          |
| VCP      | PCDH7    | TMEM63C         |
| VCPIP1   | PCDH8    | TMEM64          |
| VDAC3    | PCDH9    | TMEM65          |
| VEZF1    | PCDHA9   | TMEM74B         |
| VEZT     | PCDHAC1  | TMEM86A         |
| VGLL3    | PCDHB10  | TMEM87A         |
| VGLL4    | PCDHB11  | TMEM87B         |
| VHL      | PCDHB12  | TMEM92          |
| VHLL     | PCDHB15  | TMEM9B          |
| VKORC1L1 | PCDHB17P | TMLHE           |
| VLDLR    | PCDHB3   | TMOD2           |
| VMA21    | PCDHB4   | TMOD3           |
| VMAC     | PCDHB5   | TMPO            |
| VN1R1    | PCDHB7   | TMPPE           |
| VPS13A   | PCDHGA1  | TMPRSS4         |
| VPS13C   | PCDHGA10 | TMSB15B         |
| VPS26C   | PCDHGA11 | TMTC1           |
| VPS36    | PCDHGA12 | TMTC2           |
| VPS37A   | PCDHGA2  | TMTC3           |
| VPS50    | PCDHGA3  | TMX4            |
| VPS52    | PCDHGA4  | TNF             |
| VPS53    | PCDHGA5  | TNFAIP1         |
| VPS54    | PCDHGA6  | TNFAIP2         |
| VPS9D1   | PCDHGA7  | TNFAIP8         |
| VSIR     | PCDHGA8  | TNFAIP8L1       |
| VSTM4    | PCDHGA9  | TNFRSF10C       |
| VSTM5    | PCDHGB1  | TNFRSF11B       |
| VSX1     | PCDHGB2  | TNFRSF13C       |
| VTI1     | PCDHGB3  | TNFRSF14        |
| VTI1A    | PCDHGB4  | TNFRSF19        |
| VTI1B    | PCDHGB6  | TNFRSF1B        |
| VTN      | PCDHGB7  | TNFRSF8         |
| VWA1     | PCDHGC3  | TNFSF10         |
| VWA3B    | PCDHGC4  | TNFSF12-TNFSF13 |
| VWC2     | PCDHGC5  | TNFSF13         |
| VWC2L    | PCF11    | TNFSF13B        |
| VWDE     | PCGF3    | TNFSF14         |
| WAC      | PCGF5    | TNFSF15         |
| WARS2    | PCGF6    | TNFSF4          |

|        |         |          |
|--------|---------|----------|
| WASF2  | PCID2   | TNFSF8   |
| WASF3  | PCLO    | TNIK     |
| WASL   | PCMTD2  | TNIP1    |
| WBP1L  | PCNA    | TNKS     |
| WDCP   | PCNP    | TNKS2    |
| WDFY2  | PCNX1   | TNN      |
| WDPCP  | PCNX2   | TNNI1    |
| WDR12  | PCSK1   | TNPO1    |
| WDR20  | PCSK2   | TNR      |
| WDR33  | PCSK5   | TNRC6A   |
| WDR35  | PCSK7   | TNRC6B   |
| WDR4   | PCSK9   | TNRC6C   |
| WDR41  | PCTP    | TNS3     |
| WDR47  | PCYOX1  | TNS4     |
| WDR48  | PCYT1B  | TOB2     |
| WDR55  | PCYT2   | TOGARAM2 |
| WDR59  | PDAP1   | TOLLIP   |
| WDR6   | PDCD10  | TOM1L1   |
| WDR61  | PDCD2   | TOMM20   |
| WDR7   | PDCD4   | TOMM34   |
| WDR70  | PDCD6   | TOMM7    |
| WDR75  | PDCD6IP | TOMM70   |
| WDR77  | PDCD7   | TOPBP1   |
| WDR82  | PDCL    | TOR1AIP1 |
| WDR88  | PDE10A  | TOR1AIP2 |
| WDR97  | PDE11A  | TOR1B    |
| WDTC1  | PDE12   | TOX      |
| WEE1   | PDE1A   | TOX3     |
| WFDC1  | PDE1C   | TP53BP2  |
| WFDC13 | PDE3A   | TP53INP1 |
| WFS1   | PDE3B   | TP53INP2 |
| WIF1   | PDE4B   | TP63     |
| WIPF1  | PDE4D   | TPCN2    |
| WIPF2  | PDE4DIP | TPD52    |
| WIPI2  | PDE5A   | TPD52L1  |
| WLS    | PDE6A   | TPD52L2  |
| WNK3   | PDE6D   | TPGS2    |
| WNT1   | PDE6H   | TPH1     |
| WNT10B | PDE7A   | TPK1     |
| WNT2   | PDE7B   | TPM1     |
| WNT2B  | PDE8B   | TPM3     |
| WNT7A  | PDE9A   | TPPP3    |
| WNT8B  | PDF     | TPRA1    |
| WNT9B  | PDGFC   | TPRG1    |

|        |        |          |
|--------|--------|----------|
| WRN    | PDGFD  | TPRG1L   |
| WSB1   | PDGFRA | TPT1     |
| WSB2   | PDHA1  | TRA2B    |
| WSCD1  | PDHB   | TRABD2A  |
| WT1    | PDHX   | TRABD2B  |
| WWC2   | PDIK1L | TRAF2    |
| WWC3   | PDK1   | TRAF3IP1 |
| WWP2   | PDK4   | TRAF3IP2 |
| WWTR1  | PDLIM3 | TRAF4    |
| XBP1   | PDLIM5 | TRAF5    |
| XCR1   | PDLIM7 | TRAF6    |
| XIAP   | PDP1   | TRAK1    |
| XIRP2  | PDP2   | TRAM1    |
| XK     | PDPK1  | TRAM2    |
| XKR4   | PDPR   | TRAPPC10 |
| XKR7   | PDS5B  | TRAPPC6B |
| XPO5   | PDSS2  | TRAPPC9  |
| XPO6   | PDX1   | TRARG1   |
| XPR1   | PDXDC1 | TRAT1    |
| XRCC3  | PDZD2  | TRDMT1   |
| XRCC6  | PDZD8  | TREM1    |
| XRN1   | PDZRN3 | TREML2   |
| XYLT1  | PEAK1  | TRIM14   |
| XYLT2  | PEAR1  | TRIM2    |
| YAE1   | PEG10  | TRIM24   |
| YAF2   | PELI1  | TRIM28   |
| YAP1   | PELI2  | TRIM35   |
| YARS2  | PELO   | TRIM36   |
| YEATS2 | PER2   | TRIM4    |
| YIPF3  | PER3   | TRIM44   |
| YIPF4  | PERM1  | TRIM48   |
| YIPF5  | PERP   | TRIM58   |
| YIPF6  | PEX10  | TRIM62   |
| YLPM1  | PEX11A | TRIM64B  |
| YOD1   | PEX11B | TRIM67   |
| YPEL1  | PEX13  | TRIM71   |
| YPEL3  | PEX19  | TRIM72   |
| YTHDC1 | PEX2   | TRIM74   |
| YTHDF3 | PEX26  | TRIM9    |
| YWHAE  | PEX3   | TRIOBP   |
| YWHAG  | PEX5L  | TRIP11   |
| YY1AP1 | PEX7   | TRIP13   |
| ZADH2  | PF4    | TRIP4    |
| ZBED1  | PF4V1  | TRIQQ    |

|          |         |         |
|----------|---------|---------|
| ZBED4    | PFAS    | TRMO    |
| ZBED6CL  | PFDN4   | TRMT10B |
| ZBTB16   | PFKFB2  | TRMT2A  |
| ZBTB20   | PFKM    | TRMT5   |
| ZBTB21   | PFN4    | TRMT6   |
| ZBTB24   | PGAP1   | TRMT9B  |
| ZBTB25   | PGAP2   | TRNP1   |
| ZBTB3    | PGBD2   | TROAP   |
| ZBTB33   | PGBD3   | TRPA1   |
| ZBTB34   | PGBD4   | TRPC1   |
| ZBTB37   | PGBD5   | TRPC3   |
| ZBTB39   | PGGT1B  | TRPC4   |
| ZBTB40   | PGK1    | TRPC4AP |
| ZBTB41   | PGLYRP2 | TRPC5   |
| ZBTB43   | PGM1    | TRPM2   |
| ZBTB49   | PGM2    | TRPM3   |
| ZBTB5    | PGM2L1  | TRPS1   |
| ZBTB6    | PGM3    | TRPV2   |
| ZBTB7A   | PGM5    | TRUB1   |
| ZBTB7C   | PGPEP1  | TRUB2   |
| ZBTB8B   | PGPEP1L | TSC1    |
| ZBTB8OS  | PGR     | TSC22D2 |
| ZBTB9    | PGRMC1  | TSC22D3 |
| ZC2HC1C  | PHACTR1 | TSEN2   |
| ZC3H11A  | PHACTR2 | TSEN54  |
| ZC3H12B  | PHACTR4 | TSFM    |
| ZC3H12C  | PHB     | TSHZ2   |
| ZC3H13   | PHB2    | TSKU    |
| ZC3H14   | PHC1    | TSN     |
| ZC3H7B   | PHC3    | TSNARE1 |
| ZC3H8    | PHEX    | TSPAN11 |
| ZC3HAV1L | PHF12   | TSPAN12 |
| ZCCHC14  | PHF14   | TSPAN13 |
| ZCCHC24  | PHF19   | TSPAN14 |
| ZCCHC4   | PHF20   | TSPAN15 |
| ZCRB1    | PHF20L1 | TSPAN17 |
| ZDHHC14  | PHF21B  | TSPAN2  |
| ZDHHC15  | PHF23   | TSPAN3  |
| ZDHHC17  | PHF24   | TSPAN5  |
| ZDHHC18  | PHF3    | TSPAN7  |
| ZDHHC21  | PHF6    | TSPYL1  |
| ZDHHC22  | PHF7    | TSPYL5  |
| ZDHHC23  | PHF8    | TSSK1B  |
| ZDHHC24  | PHIP    | TSTD2   |

|          |         |         |
|----------|---------|---------|
| ZDHHC3   | PHKA1   | TTBK1   |
| ZDHHC8   | PHKA2   | TTBK2   |
| ZDHHC9   | PHKG2   | TTC13   |
| ZEB2     | PHLDA3  | TTC14   |
| ZFAND1   | PHLDB1  | TTC26   |
| ZFAND2A  | PHLDB2  | TTC28   |
| ZFAND3   | PHLPP2  | TTC30B  |
| ZFAND5   | PHOX2B  | TTC31   |
| ZFHX2    | PHTF1   | TTC37   |
| ZFHX3    | PHTF2   | TTC39A  |
| ZFP1     | PHYH    | TTC39B  |
| ZFP28    | PHYHIPL | TTC39C  |
| ZFP30    | PI15    | TTC4    |
| ZFP36L2  | PI4K2A  | TTC7A   |
| ZFP37    | PI4K2B  | TTC7B   |
| ZFP62    | PI4KA   | TTC8    |
| ZFP90    | PIAS1   | TTC9    |
| ZFP91    | PIAS2   | TTF2    |
| ZFPM2    | PIAS4   | TTI2    |
| ZFYVE16  | PIBF1   | TTL     |
| ZFYVE9   | PICALM  | TTLL11  |
| ZHX1     | PID1    | TTLL12  |
| ZIC1     | PIFO    | TTLL4   |
| ZIC5     | PIGF    | TTLL7   |
| ZIK1     | PIGG    | TTPAL   |
| ZIM3     | PIGH    | TTR     |
| ZKSCAN1  | PIGK    | TUB     |
| ZKSCAN3  | PIGM    | TUBA1A  |
| ZKSCAN4  | PIGO    | TUBA1C  |
| ZKSCAN5  | PIGP    | TUBB6   |
| ZKSCAN7  | PIGR    | TUBGCP3 |
| ZKSCAN8  | PIGV    | TUBGCP4 |
| ZMAT4    | PIH1D3  | TULP4   |
| ZMIZ1    | PIK3AP1 | TWF1    |
| ZMIZ2    | PIK3C2A | TWISTNB |
| ZMPSTE24 | PIK3C3  | TWINK   |
| ZMYM4    | PIK3CA  | TXK     |
| ZMYND11  | PIK3CB  | TXLNA   |
| ZNF100   | PIK3CG  | TXLNB   |
| ZNF107   | PIK3R1  | TXLNG   |
| ZNF114   | PIK3R2  | TXNDC12 |
| ZNF124   | PIK3R3  | TXNDC16 |
| ZNF131   | PIK3R5  | TXNDC17 |
| ZNF132   | PIKFYVE | TXNRD1  |

|         |          |         |
|---------|----------|---------|
| ZNF140  | PIM3     | TXNRD2  |
| ZNF141  | PIN4     | TYR     |
| ZNF146  | PINK1    | TYRP1   |
| ZNF148  | PIP4K2A  | TYW3    |
| ZNF154  | PIP4K2C  | TYW5    |
| ZNF160  | PIP4P2   | UAP1    |
| ZNF169  | PIP5K1A  | UBA2    |
| ZNF174  | PIP5K1B  | UBA5    |
| ZNF180  | PIP5K1C  | UBA6    |
| ZNF181  | PITPNA   | UBAC1   |
| ZNF185  | PITPNB   | UBAP2L  |
| ZNF19   | PITPNC1  | UBASH3B |
| ZNF207  | PITPNM3  | UBC     |
| ZNF211  | PITX2    | UBD     |
| ZNF22   | PIWIL1   | UBE2D1  |
| ZNF230  | PIWIL2   | UBE2D3  |
| ZNF234  | PJA2     | UBE2E1  |
| ZNF236  | PKD2     | UBE2E2  |
| ZNF24   | PKHD1    | UBE2E3  |
| ZNF25   | PKHD1L1  | UBE2F   |
| ZNF253  | PKIA     | UBE2G1  |
| ZNF256  | PKLR     | UBE2G2  |
| ZNF260  | PKN2     | UBE2H   |
| ZNF264  | PKNOX1   | UBE2I   |
| ZNF268  | PKP4     | UBE2J1  |
| ZNF274  | PLA2G12A | UBE2J2  |
| ZNF275  | PLA2G2C  | UBE2K   |
| ZNF277  | PLA2G4A  | UBE2N   |
| ZNF280C | PLA2G4D  | UBE2O   |
| ZNF280D | PLA2G4E  | UBE2Q1  |
| ZNF284  | PLA2G4F  | UBE2QL1 |
| ZNF287  | PLA2G5   | UBE2S   |
| ZNF3    | PLA2G7   | UBE2T   |
| ZNF302  | PLA2R1   | UBE2V2  |
| ZNF317  | PLAA     | UBE2W   |
| ZNF326  | PLAAT3   | UBE3B   |
| ZNF330  | PLAAT5   | UBE4A   |
| ZNF333  | PLAC8    | UBIAD1  |
| ZNF337  | PLAG1    | UBN2    |
| ZNF341  | PLAGL2   | UBOX5   |
| ZNF343  | PLAU     | UBP1    |
| ZNF35   | PLB1     | UBQLN4  |
| ZNF350  | PLBD2    | UBR5    |
| ZNF354C | PLCB1    | UBR7    |

|            |          |              |
|------------|----------|--------------|
| ZNF362     | PLCB4    | UBTD2        |
| ZNF367     | PLCD4    | UBXN10       |
| ZNF37A     | PLCE1    | UBXN2A       |
| ZNF385A    | PLCG1    | UBXN2B       |
| ZNF385B    | PLCH1    | UBXN7        |
| ZNF391     | PLCL1    | UCHL5        |
| ZNF395     | PLCXD1   | UCMA         |
| ZNF396     | PLCXD2   | UCP2         |
| ZNF397     | PLCXD3   | UCP3         |
| ZNF407     | PLD1     | UEVLD        |
| ZNF410     | PLD2     | UFL1         |
| ZNF417     | PLD5     | UFM1         |
| ZNF426     | PLD6     | UGCG         |
| ZNF429     | PLEKHA1  | UGT2B15      |
| ZNF431     | PLEKHA3  | UGT8         |
| ZNF436     | PLEKHA5  | UHMK1        |
| ZNF436-AS1 | PLEKHA6  | UHRF1        |
| ZNF446     | PLEKHA8  | UHRF1BP1L    |
| ZNF451     | PLEKHB2  | ULK2         |
| ZNF460     | PLEKHF2  | ULK3         |
| ZNF461     | PLEKHG2  | UMPS         |
| ZNF462     | PLEKHG3  | UNC13A       |
| ZNF471     | PLEKHG4B | UNC13B       |
| ZNF483     | PLEKHG5  | UNC5B        |
| ZNF490     | PLEKHH1  | UNC5C        |
| ZNF496     | PLEKHH2  | UNC5D        |
| ZNF500     | PLEKHM1  | UNC79        |
| ZNF501     | PLEKHM3  | UNC93A       |
| ZNF507     | PLEKHO1  | UNKL         |
| ZNF512     | PLEKHS1  | UPF1         |
| ZNF514     | PLG      | UPF3B        |
| ZNF518B    | PLGLB1   | UPP2         |
| ZNF530     | PLGLB2   | UQCC3        |
| ZNF536     | PLIN3    | UQCR10       |
| ZNF543     | PLIN5    | UQCR11       |
| ZNF546     | PLK2     | UQCRB        |
| ZNF547     | PLLP     | UQCRFS1      |
| ZNF548     | PLN      | URB1         |
| ZNF549     | PLP2     | URGCP-MRPS24 |
| ZNF550     | PLPBP    | URI1         |
| ZNF551     | PLPP3    | UROS         |
| ZNF552     | PLPP4    | USB1         |
| ZNF555     | PLPP5    | USF3         |
| ZNF556     | PLPP6    | USP1         |



|               |              |        |
|---------------|--------------|--------|
| ZNF557        | PLPP7        | USP13  |
| ZNF559-ZNF177 | PLPPR4       | USP14  |
| ZNF560        | PLPPR5       | USP15  |
| ZNF561        | PLRG1        | USP18  |
| ZNF562        | PLS1         | USP21  |
| ZNF572        | PLSCR1       | USP22  |
| ZNF574        | PLSCR2       | USP28  |
| ZNF576        | PLSCR5       | USP3   |
| ZNF583        | PLXDC2       | USP30  |
| ZNF584        | PLXNA2       | USP31  |
| ZNF585A       | PLXNA4       | USP32  |
| ZNF587B       | PLXNB1       | USP35  |
| ZNF592        | PLXNC1       | USP36  |
| ZNF593        | PM20D1       | USP39  |
| ZNF605        | PM20D2       | USP4   |
| ZNF607        | PMAIP1       | USP40  |
| ZNF613        | PMEPA1       | USP46  |
| ZNF614        | PMP2         | USP47  |
| ZNF616        | PMPCA        | USP48  |
| ZNF618        | PMPCB        | USP49  |
| ZNF620        | PMVK         | USP5   |
| ZNF621        | PNISR        | USP51  |
| ZNF623        | PNLIPRP3     | USP53  |
| ZNF624        | PNMA1        | USP54  |
| ZNF625        | PNMA2        | USP6   |
| ZNF626        | PNMA6A       | USP6NL |
| ZNF629        | PNMA8A       | USP9X  |
| ZNF641        | PNN          | USP9Y  |
| ZNF652        | PNO1         | UST    |
| ZNF655        | PNOC         | UTP14A |
| ZNF660        | PNP          | UTP14C |
| ZNF668        | PNPLA3       | UTP15  |
| ZNF670        | PNPLA4       | UTP25  |
| ZNF680        | PNPLA8       | UTP6   |
| ZNF695        | PNRC1        | UTS2B  |
| ZNF697        | PNRC2        | UTY    |
| ZNF699        | POC1B        | VAMP3  |
| ZNF70         | POC1B-GALNT4 | VAMP4  |
| ZNF701        | POF1B        | VAMP7  |
| ZNF703        | POFUT1       | VANGL1 |
| ZNF704        | POFUT2       | VANGL2 |
| ZNF705A       | POGK         | VAPB   |
| ZNF705D       | POGLUT1      | VASH1  |
| ZNF705G       | POGLUT3      | VASH2  |

|         |           |          |
|---------|-----------|----------|
| ZNF706  | POLA1     | VAT1     |
| ZNF708  | POLA2     | VAT1L    |
| ZNF709  | POLE      | VAV2     |
| ZNF71   | POLE4     | VAV3     |
| ZNF711  | POLG      | VAX1     |
| ZNF714  | POLH      | VCAM1    |
| ZNF736  | POLI      | VCAN     |
| ZNF74   | POLK      | VCL      |
| ZNF746  | POLM      | VCPIP1   |
| ZNF747  | POLQ      | VDAC3    |
| ZNF749  | POLR1A    | VEZF1    |
| ZNF75A  | POLR1B    | VEZT     |
| ZNF764  | POLR1C    | VGLL3    |
| ZNF765  | POLR1E    | VGLL4    |
| ZNF770  | POLR2C    | VHL      |
| ZNF772  | POLR2D    | VHLL     |
| ZNF773  | POLR2E    | VIL1     |
| ZNF776  | POLR2F    | VIT      |
| ZNF778  | POLR2M    | VKORC1L1 |
| ZNF785  | POLR3A    | VDLR     |
| ZNF789  | POLR3B    | VMA21    |
| ZNF791  | POLR3E    | VMAC     |
| ZNF793  | POLR3F    | VN1R1    |
| ZNF799  | POLR3G    | VNN1     |
| ZNF805  | POLR3K    | VPS13A   |
| ZNF814  | POM121    | VPS13B   |
| ZNF831  | POM121L12 | VPS13C   |
| ZNF844  | POMC      | VPS26A   |
| ZNF85   | POMP      | VPS26C   |
| ZNF852  | POMT1     | VPS36    |
| ZNF875  | PON1      | VPS37A   |
| ZNF879  | PON3      | VPS50    |
| ZNF880  | POP1      | VPS52    |
| ZNF891  | POP4      | VPS53    |
| ZNF91   | POPDC2    | VPS54    |
| ZNF93   | POSTN     | VPS9D1   |
| ZNHIT6  | POT1      | VRTN     |
| ZNRD2   | POTED     | VSIR     |
| ZNRF1   | POTEE     | VSTM4    |
| ZNRF2   | POTEI     | VSTM5    |
| ZNRF3   | POU1F1    | VSX1     |
| ZRANB1  | POU2AF1   | VSX2     |
| ZSCAN12 | POU2F1    | VT A1    |
| ZSCAN22 | POU2F2    | VTI1A    |

|         |          |       |
|---------|----------|-------|
| ZSCAN23 | POU3F2   | VTI1B |
| ZSCAN31 | POU3F3   | VTN   |
| ZSWIM4  | POU4F1   | VWA1  |
| ZSWIM7  | POU4F2   | VWA3B |
| ZW10    | POU6F2   | VWC2  |
| ZXDA    | PP7080   | VWC2L |
| ZXDB    | PPA2     | VWDE  |
| ZXDC    | PPARD    | WAC   |
| ZYX     | PPARG    | WARS  |
| ZZEF1   | PPARGC1A | WARS2 |
| ZZZ3    | PPARGC1B | WASF2 |
|         | PPAT     | WASF3 |
|         | PPBP     | WASL  |
|         | PPDPF    | WBP1L |
|         | PPEF2    | WDCP  |
|         | PPFIA1   | WDFY2 |
|         | PPFIBP1  | WDHD1 |
|         | PPHLN1   | WDPCP |
|         | PPIE     | WDR12 |
|         | PPIF     | WDR20 |
|         | PPIG     | WDR3  |
|         | PPIL1    | WDR33 |
|         | PPIL4    | WDR34 |
|         | PPIL6    | WDR35 |
|         | PPIP5K2  | WDR4  |
|         | PPL      | WDR41 |
|         | PPM1A    | WDR47 |
|         | PPM1B    | WDR48 |
|         | PPM1D    | WDR55 |
|         | PPM1E    | WDR59 |
|         | PPM1H    | WDR60 |
|         | PPM1K    | WDR61 |
|         | PPM1L    | WDR7  |
|         | PPME1    | WDR70 |
|         | PPP1CB   | WDR73 |
|         | PPP1CC   | WDR75 |
|         | PPP1R12A | WDR76 |
|         | PPP1R12B | WDR77 |
|         | PPP1R14C | WDR82 |
|         | PPP1R15A | WDR89 |
|         | PPP1R15B | WDR97 |
|         | PPP1R1A  | WDTC1 |
|         | PPP1R1C  | WEE1  |
|         | PPP1R21  | WFDC1 |

|                 |               |
|-----------------|---------------|
| <i>PPP1R3A</i>  | <i>WFDC13</i> |
| <i>PPP1R3B</i>  | <i>WFS1</i>   |
| <i>PPP1R3C</i>  | <i>WIF1</i>   |
| <i>PPP1R3D</i>  | <i>WIPF1</i>  |
| <i>PPP1R3E</i>  | <i>WIPF2</i>  |
| <i>PPP1R3G</i>  | <i>WIFI2</i>  |
| <i>PPP1R9A</i>  | <i>WLS</i>    |
| <i>PPP2CA</i>   | <i>WNK3</i>   |
| <i>PPP2R1A</i>  | <i>WNT1</i>   |
| <i>PPP2R1B</i>  | <i>WNT10B</i> |
| <i>PPP2R2A</i>  | <i>WNT2</i>   |
| <i>PPP2R2B</i>  | <i>WNT2B</i>  |
| <i>PPP2R2C</i>  | <i>WNT8B</i>  |
| <i>PPP2R3A</i>  | <i>WNT9B</i>  |
| <i>PPP2R5C</i>  | <i>WRN</i>    |
| <i>PPP2R5E</i>  | <i>WSB1</i>   |
| <i>PPP3CB</i>   | <i>WSB2</i>   |
| <i>PPP3CC</i>   | <i>WSCD1</i>  |
| <i>PPP3R1</i>   | <i>WT1</i>    |
| <i>PPP3R2</i>   | <i>WWC2</i>   |
| <i>PPP4R1</i>   | <i>WWC3</i>   |
| <i>PPP4R2</i>   | <i>WWP2</i>   |
| <i>PPP4R3A</i>  | <i>WWTR1</i>  |
| <i>PPP4R4</i>   | <i>XAF1</i>   |
| <i>PPP5D1</i>   | <i>XBP1</i>   |
| <i>PPP6C</i>    | <i>XCR1</i>   |
| <i>PPP6R1</i>   | <i>XIAP</i>   |
| <i>PPP6R3</i>   | <i>XIRP2</i>  |
| <i>PPTC7</i>    | <i>XK</i>     |
| <i>PPWD1</i>    | <i>XKR4</i>   |
| <i>PQLC2</i>    | <i>XKR7</i>   |
| <i>PQLC2L</i>   | <i>XPO5</i>   |
| <i>PRAF2</i>    | <i>XPR1</i>   |
| <i>PRAMEF1</i>  | <i>XRCC3</i>  |
| <i>PRAMEF15</i> | <i>XRCC6</i>  |
| <i>PRAMEF2</i>  | <i>XRN1</i>   |
| <i>PRAMEF27</i> | <i>XYLT2</i>  |
| <i>PRAMEF4</i>  | <i>YAE1</i>   |
| <i>PRAMEF6</i>  | <i>YAF2</i>   |
| <i>PRAMEF7</i>  | <i>YAP1</i>   |
| <i>PRAMEF8</i>  | <i>YARS2</i>  |
| <i>PRC1</i>     | <i>YEATS2</i> |
| <i>PRCP</i>     | <i>YIPF3</i>  |
| <i>PRDM1</i>    | <i>YIPF4</i>  |

|                 |                |
|-----------------|----------------|
| <i>PRDM10</i>   | <i>YIPF5</i>   |
| <i>PRDM13</i>   | <i>YIPF6</i>   |
| <i>PRDM15</i>   | <i>YME1L1</i>  |
| <i>PRDM16</i>   | <i>YOD1</i>    |
| <i>PRDM2</i>    | <i>YPEL1</i>   |
| <i>PRDM4</i>    | <i>YPEL2</i>   |
| <i>PRDM5</i>    | <i>YPEL3</i>   |
| <i>PRDM6</i>    | <i>YTHDC1</i>  |
| <i>PRDM7</i>    | <i>YTHDF2</i>  |
| <i>PRELID2</i>  | <i>YTHDF3</i>  |
| <i>PRELID3B</i> | <i>YWHAB</i>   |
| <i>PRELP</i>    | <i>YWHAE</i>   |
| <i>PREPL</i>    | <i>YWHAG</i>   |
| <i>PREX1</i>    | <i>YWHAZ</i>   |
| <i>PREX2</i>    | <i>YY1</i>     |
| <i>PRH2</i>     | <i>YY2</i>     |
| <i>PRICKLE2</i> | <i>ZADH2</i>   |
| <i>PRIM1</i>    | <i>ZBED1</i>   |
| <i>PRIMPOL</i>  | <i>ZBED4</i>   |
| <i>PRKAA1</i>   | <i>ZBED6CL</i> |
| <i>PRKAA2</i>   | <i>ZBTB16</i>  |
| <i>PRKAB1</i>   | <i>ZBTB2</i>   |
| <i>PRKAB2</i>   | <i>ZBTB20</i>  |
| <i>PRKACA</i>   | <i>ZBTB21</i>  |
| <i>PRKACB</i>   | <i>ZBTB24</i>  |
| <i>PRKACG</i>   | <i>ZBTB25</i>  |
| <i>PRKAG2</i>   | <i>ZBTB26</i>  |
| <i>PRKAG3</i>   | <i>ZBTB3</i>   |
| <i>PRKAR1A</i>  | <i>ZBTB33</i>  |
| <i>PRKAR2A</i>  | <i>ZBTB34</i>  |
| <i>PRKAR2B</i>  | <i>ZBTB37</i>  |
| <i>PRKCA</i>    | <i>ZBTB39</i>  |
| <i>PRKCE</i>    | <i>ZBTB40</i>  |
| <i>PRKCI</i>    | <i>ZBTB41</i>  |
| <i>PRKCQ</i>    | <i>ZBTB42</i>  |
| <i>PRKDC</i>    | <i>ZBTB43</i>  |
| <i>PRKG1</i>    | <i>ZBTB49</i>  |
| <i>PRKG2</i>    | <i>ZBTB5</i>   |
| <i>PRKN</i>     | <i>ZBTB6</i>   |
| <i>PRKRA</i>    | <i>ZBTB7B</i>  |
| <i>PRKX</i>     | <i>ZBTB7C</i>  |
| <i>PRL</i>      | <i>ZBTB8B</i>  |
| <i>PRLHR</i>    | <i>ZBTB8OS</i> |
| <i>PRMT2</i>    | <i>ZBTB9</i>   |

|                |                 |
|----------------|-----------------|
| <i>PRMT3</i>   | <i>ZC2HC1C</i>  |
| <i>PRMT5</i>   | <i>ZC3H10</i>   |
| <i>PRMT6</i>   | <i>ZC3H11A</i>  |
| <i>PRMT9</i>   | <i>ZC3H12B</i>  |
| <i>PRND</i>    | <i>ZC3H12C</i>  |
| <i>PRNP</i>    | <i>ZC3H13</i>   |
| <i>PROK2</i>   | <i>ZC3H14</i>   |
| <i>PROM2</i>   | <i>ZC3H15</i>   |
| <i>PROP1</i>   | <i>ZC3H4</i>    |
| <i>PRORP</i>   | <i>ZC3H7B</i>   |
| <i>PROS1</i>   | <i>ZC3H8</i>    |
| <i>PROSER1</i> | <i>ZC3HAV1L</i> |
| <i>PROSER2</i> | <i>ZCCHC14</i>  |
| <i>PROSER3</i> | <i>ZCCHC24</i>  |
| <i>PROX1</i>   | <i>ZCCHC4</i>   |
| <i>PROX2</i>   | <i>ZCRB1</i>    |
| <i>PRPF18</i>  | <i>ZDHHC14</i>  |
| <i>PRPF19</i>  | <i>ZDHHC15</i>  |
| <i>PRPF38A</i> | <i>ZDHHC17</i>  |
| <i>PRPF38B</i> | <i>ZDHHC18</i>  |
| <i>PRPF39</i>  | <i>ZDHHC2</i>   |
| <i>PRPF4</i>   | <i>ZDHHC20</i>  |
| <i>PRPF40A</i> | <i>ZDHHC21</i>  |
| <i>PRPF4B</i>  | <i>ZDHHC22</i>  |
| <i>PRPH2</i>   | <i>ZDHHC23</i>  |
| <i>PRPS1</i>   | <i>ZDHHC24</i>  |
| <i>PRPS2</i>   | <i>ZDHHC3</i>   |
| <i>PRPSAP2</i> | <i>ZDHHC8</i>   |
| <i>PRR14L</i>  | <i>ZDHHC9</i>   |
| <i>PRR15</i>   | <i>ZEB1</i>     |
| <i>PRR16</i>   | <i>ZEB2</i>     |
| <i>PRR20A</i>  | <i>ZFAND1</i>   |
| <i>PRR20B</i>  | <i>ZFAND2A</i>  |
| <i>PRR20C</i>  | <i>ZFAND3</i>   |
| <i>PRR20D</i>  | <i>ZFAND5</i>   |
| <i>PRR20E</i>  | <i>ZFHX2</i>    |
| <i>PRR23A</i>  | <i>ZFHX3</i>    |
| <i>PRR23B</i>  | <i>ZFP1</i>     |
| <i>PRR23D1</i> | <i>ZFP14</i>    |
| <i>PRR23D2</i> | <i>ZFP2</i>     |
| <i>PRR27</i>   | <i>ZFP28</i>    |
| <i>PRR29</i>   | <i>ZFP30</i>    |
| <i>PRR3</i>    | <i>ZFP36L2</i>  |
| <i>PRR5L</i>   | <i>ZFP37</i>    |

|                |                 |
|----------------|-----------------|
| <i>PRR9</i>    | <i>ZFP62</i>    |
| <i>PRRC1</i>   | <i>ZFP90</i>    |
| <i>PRRG4</i>   | <i>ZFP91</i>    |
| <i>PRRX1</i>   | <i>ZFPM2</i>    |
| <i>PRSS12</i>  | <i>ZFYVE16</i>  |
| <i>PRSS22</i>  | <i>ZFYVE27</i>  |
| <i>PRSS23</i>  | <i>ZHX1</i>     |
| <i>PRSS33</i>  | <i>ZIC1</i>     |
| <i>PRSS35</i>  | <i>ZIC5</i>     |
| <i>PRTG</i>    | <i>ZIK1</i>     |
| <i>PRUNE2</i>  | <i>ZIM3</i>     |
| <i>PRXL2B</i>  | <i>ZKSCAN1</i>  |
| <i>PRXL2C</i>  | <i>ZKSCAN3</i>  |
| <i>PSAPL1</i>  | <i>ZKSCAN4</i>  |
| <i>PSAT1</i>   | <i>ZKSCAN5</i>  |
| <i>PSD3</i>    | <i>ZKSCAN7</i>  |
| <i>PSD4</i>    | <i>ZKSCAN8</i>  |
| <i>PSEN1</i>   | <i>ZMAT4</i>    |
| <i>PSG1</i>    | <i>ZMIZ1</i>    |
| <i>PSG11</i>   | <i>ZMIZ2</i>    |
| <i>PSG2</i>    | <i>ZMPSTE24</i> |
| <i>PSG3</i>    | <i>ZMYM4</i>    |
| <i>PSG4</i>    | <i>ZMYM6</i>    |
| <i>PSG5</i>    | <i>ZNF100</i>   |
| <i>PSG8</i>    | <i>ZNF107</i>   |
| <i>PSIP1</i>   | <i>ZNF112</i>   |
| <i>PSKH2</i>   | <i>ZNF117</i>   |
| <i>PSMA2</i>   | <i>ZNF124</i>   |
| <i>PSMA4</i>   | <i>ZNF132</i>   |
| <i>PSMA5</i>   | <i>ZNF134</i>   |
| <i>PSMA8</i>   | <i>ZNF136</i>   |
| <i>PSMB2</i>   | <i>ZNF138</i>   |
| <i>PSMC3IP</i> | <i>ZNF140</i>   |
| <i>PSMD1</i>   | <i>ZNF141</i>   |
| <i>PSMD10</i>  | <i>ZNF146</i>   |
| <i>PSMD11</i>  | <i>ZNF148</i>   |
| <i>PSMD12</i>  | <i>ZNF154</i>   |
| <i>PSMD5</i>   | <i>ZNF160</i>   |
| <i>PSME4</i>   | <i>ZNF169</i>   |
| <i>PSMF1</i>   | <i>ZNF174</i>   |
| <i>PSMG1</i>   | <i>ZNF180</i>   |
| <i>PSMG4</i>   | <i>ZNF181</i>   |
| <i>PSPC1</i>   | <i>ZNF185</i>   |
| <i>PSPH</i>    | <i>ZNF19</i>    |

|               |                |
|---------------|----------------|
| <i>PSRC1</i>  | <i>ZNF195</i>  |
| <i>PTAFR</i>  | <i>ZNF207</i>  |
| <i>PTAR1</i>  | <i>ZNF208</i>  |
| <i>PTBP2</i>  | <i>ZNF211</i>  |
| <i>PTBP3</i>  | <i>ZNF22</i>   |
| <i>PTCD2</i>  | <i>ZNF224</i>  |
| <i>PTCD3</i>  | <i>ZNF233</i>  |
| <i>PTCH1</i>  | <i>ZNF234</i>  |
| <i>PTCHD1</i> | <i>ZNF236</i>  |
| <i>PTCHD3</i> | <i>ZNF24</i>   |
| <i>PTCHD4</i> | <i>ZNF25</i>   |
| <i>PTDSS1</i> | <i>ZNF253</i>  |
| <i>PTDSS2</i> | <i>ZNF256</i>  |
| <i>PTEN</i>   | <i>ZNF260</i>  |
| <i>PTER</i>   | <i>ZNF264</i>  |
| <i>PTGDR</i>  | <i>ZNF268</i>  |
| <i>PTGER2</i> | <i>ZNF274</i>  |
| <i>PTGER3</i> | <i>ZNF275</i>  |
| <i>PTGER4</i> | <i>ZNF277</i>  |
| <i>PTGES</i>  | <i>ZNF280C</i> |
| <i>PTGES3</i> | <i>ZNF280D</i> |
| <i>PTGFR</i>  | <i>ZNF284</i>  |
| <i>PTGFRN</i> | <i>ZNF287</i>  |
| <i>PTGIR</i>  | <i>ZNF3</i>    |
| <i>PTGIS</i>  | <i>ZNF302</i>  |
| <i>PTGR2</i>  | <i>ZNF317</i>  |
| <i>PTGS1</i>  | <i>ZNF319</i>  |
| <i>PTGS2</i>  | <i>ZNF326</i>  |
| <i>PTH2R</i>  | <i>ZNF330</i>  |
| <i>PTHLH</i>  | <i>ZNF331</i>  |
| <i>PTK2</i>   | <i>ZNF333</i>  |
| <i>PTPDC1</i> | <i>ZNF337</i>  |
| <i>PTPMT1</i> | <i>ZNF341</i>  |
| <i>PTPN1</i>  | <i>ZNF343</i>  |
| <i>PTPN11</i> | <i>ZNF35</i>   |
| <i>PTPN14</i> | <i>ZNF350</i>  |
| <i>PTPN2</i>  | <i>ZNF354C</i> |
| <i>PTPN20</i> | <i>ZNF362</i>  |
| <i>PTPN3</i>  | <i>ZNF366</i>  |
| <i>PTPN4</i>  | <i>ZNF367</i>  |
| <i>PTPRB</i>  | <i>ZNF37A</i>  |
| <i>PTPRC</i>  | <i>ZNF382</i>  |
| <i>PTPRD</i>  | <i>ZNF385A</i> |
| <i>PTPRE</i>  | <i>ZNF385B</i> |



|                |                   |
|----------------|-------------------|
| <i>PTPRG</i>   | <i>ZNF391</i>     |
| <i>PTPRJ</i>   | <i>ZNF395</i>     |
| <i>PTPRK</i>   | <i>ZNF396</i>     |
| <i>PTPRM</i>   | <i>ZNF397</i>     |
| <i>PTPRN2</i>  | <i>ZNF407</i>     |
| <i>PTPRO</i>   | <i>ZNF417</i>     |
| <i>PTPRT</i>   | <i>ZNF419</i>     |
| <i>PTPRZ1</i>  | <i>ZNF426</i>     |
| <i>PTRH2</i>   | <i>ZNF429</i>     |
| <i>PTRHD1</i>  | <i>ZNF431</i>     |
| <i>PTS</i>     | <i>ZNF436</i>     |
| <i>PTTG1IP</i> | <i>ZNF436-AS1</i> |
| <i>PUDP</i>    | <i>ZNF439</i>     |
| <i>PUM2</i>    | <i>ZNF440</i>     |
| <i>PURA</i>    | <i>ZNF446</i>     |
| <i>PURB</i>    | <i>ZNF451</i>     |
| <i>PURG</i>    | <i>ZNF460</i>     |
| <i>PUS10</i>   | <i>ZNF461</i>     |
| <i>PUS3</i>    | <i>ZNF471</i>     |
| <i>PUS7</i>    | <i>ZNF479</i>     |
| <i>PUS7L</i>   | <i>ZNF483</i>     |
| <i>PVRIG</i>   | <i>ZNF484</i>     |
| <i>PWP1</i>    | <i>ZNF490</i>     |
| <i>PWWP2A</i>  | <i>ZNF493</i>     |
| <i>PWWP3B</i>  | <i>ZNF496</i>     |
| <i>PXDN</i>    | <i>ZNF500</i>     |
| <i>PXK</i>     | <i>ZNF501</i>     |
| <i>PXMP4</i>   | <i>ZNF503</i>     |
| <i>PXN</i>     | <i>ZNF507</i>     |
| <i>PXT1</i>    | <i>ZNF514</i>     |
| <i>PXYLP1</i>  | <i>ZNF518B</i>    |
| <i>PYGO1</i>   | <i>ZNF525</i>     |
| <i>PYHIN1</i>  | <i>ZNF530</i>     |
| <i>PYROXD1</i> | <i>ZNF536</i>     |
| <i>PYROXD2</i> | <i>ZNF543</i>     |
| <i>QDPR</i>    | <i>ZNF546</i>     |
| <i>QKI</i>     | <i>ZNF547</i>     |
| <i>QPCT</i>    | <i>ZNF548</i>     |
| <i>QPCTL</i>   | <i>ZNF549</i>     |
| <i>QRFPR</i>   | <i>ZNF550</i>     |
| <i>QRSL1</i>   | <i>ZNF551</i>     |
| <i>QSER1</i>   | <i>ZNF552</i>     |
| <i>QSOX2</i>   | <i>ZNF555</i>     |
| <i>QTRT2</i>   | <i>ZNF556</i>     |

|                  |                      |
|------------------|----------------------|
| <i>R3HDM1</i>    | <i>ZNF557</i>        |
| <i>RAB10</i>     | <i>ZNF559-ZNF177</i> |
| <i>RAB11A</i>    | <i>ZNF560</i>        |
| <i>RAB11B</i>    | <i>ZNF561</i>        |
| <i>RAB11FIP1</i> | <i>ZNF562</i>        |
| <i>RAB11FIP2</i> | <i>ZNF571</i>        |
| <i>RAB12</i>     | <i>ZNF572</i>        |
| <i>RAB14</i>     | <i>ZNF576</i>        |
| <i>RAB15</i>     | <i>ZNF579</i>        |
| <i>RAB17</i>     | <i>ZNF583</i>        |
| <i>RAB18</i>     | <i>ZNF584</i>        |
| <i>RAB1A</i>     | <i>ZNF585A</i>       |
| <i>RAB21</i>     | <i>ZNF587</i>        |
| <i>RAB22A</i>    | <i>ZNF587B</i>       |
| <i>RAB23</i>     | <i>ZNF592</i>        |
| <i>RAB27A</i>    | <i>ZNF593</i>        |
| <i>RAB27B</i>    | <i>ZNF605</i>        |
| <i>RAB28</i>     | <i>ZNF607</i>        |
| <i>RAB29</i>     | <i>ZNF613</i>        |
| <i>RAB2A</i>     | <i>ZNF614</i>        |
| <i>RAB2B</i>     | <i>ZNF616</i>        |
| <i>RAB30</i>     | <i>ZNF618</i>        |
| <i>RAB31</i>     | <i>ZNF620</i>        |
| <i>RAB32</i>     | <i>ZNF621</i>        |
| <i>RAB33B</i>    | <i>ZNF623</i>        |
| <i>RAB38</i>     | <i>ZNF624</i>        |
| <i>RAB39B</i>    | <i>ZNF625</i>        |
| <i>RAB3B</i>     | <i>ZNF626</i>        |
| <i>RAB3C</i>     | <i>ZNF629</i>        |
| <i>RAB3GAP1</i>  | <i>ZNF641</i>        |
| <i>RAB3GAP2</i>  | <i>ZNF652</i>        |
| <i>RAB3IL1</i>   | <i>ZNF655</i>        |
| <i>RAB3IP</i>    | <i>ZNF660</i>        |
| <i>RAB41</i>     | <i>ZNF670</i>        |
| <i>RAB42</i>     | <i>ZNF672</i>        |
| <i>RAB43</i>     | <i>ZNF676</i>        |
| <i>RAB4A</i>     | <i>ZNF680</i>        |
| <i>RAB5IF</i>    | <i>ZNF695</i>        |
| <i>RAB6A</i>     | <i>ZNF697</i>        |
| <i>RAB6B</i>     | <i>ZNF699</i>        |
| <i>RAB6C</i>     | <i>ZNF70</i>         |
| <i>RAB7A</i>     | <i>ZNF701</i>        |
| <i>RAB8B</i>     | <i>ZNF703</i>        |
| <i>RAB9B</i>     | <i>ZNF704</i>        |

|                 |                |
|-----------------|----------------|
| <i>RABGAP1</i>  | <i>ZNF705A</i> |
| <i>RABGAP1L</i> | <i>ZNF705D</i> |
| <i>RABGEF1</i>  | <i>ZNF705G</i> |
| <i>RABIF</i>    | <i>ZNF706</i>  |
| <i>RABL2A</i>   | <i>ZNF708</i>  |
| <i>RABL2B</i>   | <i>ZNF709</i>  |
| <i>RABL3</i>    | <i>ZNF71</i>   |
| <i>RABL6</i>    | <i>ZNF716</i>  |
| <i>RAC1</i>     | <i>ZNF726</i>  |
| <i>RACGAP1</i>  | <i>ZNF728</i>  |
| <i>RAD1</i>     | <i>ZNF736</i>  |
| <i>RAD17</i>    | <i>ZNF737</i>  |
| <i>RAD18</i>    | <i>ZNF74</i>   |
| <i>RAD21</i>    | <i>ZNF746</i>  |
| <i>RAD21L1</i>  | <i>ZNF747</i>  |
| <i>RAD50</i>    | <i>ZNF749</i>  |
| <i>RAD51</i>    | <i>ZNF75A</i>  |
| <i>RAD51AP1</i> | <i>ZNF764</i>  |
| <i>RAD51AP2</i> | <i>ZNF765</i>  |
| <i>RAD51B</i>   | <i>ZNF772</i>  |
| <i>RAD51C</i>   | <i>ZNF773</i>  |
| <i>RAD52</i>    | <i>ZNF776</i>  |
| <i>RAD54B</i>   | <i>ZNF778</i>  |
| <i>RAD54L2</i>  | <i>ZNF785</i>  |
| <i>RAD9B</i>    | <i>ZNF789</i>  |
| <i>RADX</i>     | <i>ZNF791</i>  |
| <i>RAE1</i>     | <i>ZNF793</i>  |
| <i>RAG1</i>     | <i>ZNF799</i>  |
| <i>RAI14</i>    | <i>ZNF805</i>  |
| <i>RAI2</i>     | <i>ZNF814</i>  |
| <i>RALA</i>     | <i>ZNF827</i>  |
| <i>RALB</i>     | <i>ZNF831</i>  |
| <i>RALBP1</i>   | <i>ZNF844</i>  |
| <i>RALGAPA1</i> | <i>ZNF85</i>   |
| <i>RALGAPA2</i> | <i>ZNF850</i>  |
| <i>RALGPS1</i>  | <i>ZNF852</i>  |
| <i>RALGPS2</i>  | <i>ZNF875</i>  |
| <i>RALY</i>     | <i>ZNF879</i>  |
| <i>RALYL</i>    | <i>ZNF880</i>  |
| <i>RAMAC</i>    | <i>ZNF891</i>  |
| <i>RAN</i>      | <i>ZNF90</i>   |
| <i>RANBP1</i>   | <i>ZNF91</i>   |
| <i>RANBP2</i>   | <i>ZNF92</i>   |
| <i>RANBP3L</i>  | <i>ZNF93</i>   |

|                 |                |
|-----------------|----------------|
| <i>RANBP6</i>   | <i>ZNF99</i>   |
| <i>RANBP9</i>   | <i>ZNHIT6</i>  |
| <i>RANGAP1</i>  | <i>ZNRF1</i>   |
| <i>RAP1A</i>    | <i>ZNRF2</i>   |
| <i>RAP1GAP</i>  | <i>ZNRF3</i>   |
| <i>RAP2A</i>    | <i>ZRANB1</i>  |
| <i>RAP2B</i>    | <i>ZSCAN12</i> |
| <i>RAP2C</i>    | <i>ZSCAN16</i> |
| <i>RAPGEF1</i>  | <i>ZSCAN18</i> |
| <i>RAPGEF2</i>  | <i>ZSCAN22</i> |
| <i>RAPGEF3</i>  | <i>ZSCAN31</i> |
| <i>RAPGEF5</i>  | <i>ZSWIM4</i>  |
| <i>RAPGEF6</i>  | <i>ZSWIM7</i>  |
| <i>RAPH1</i>    | <i>ZXDA</i>    |
| <i>RARB</i>     | <i>ZXDB</i>    |
| <i>RARRES1</i>  | <i>ZXDC</i>    |
| <i>RARS2</i>    | <i>ZYG11B</i>  |
| <i>RASA1</i>    | <i>ZYX</i>     |
| <i>RASA2</i>    | <i>ZZEF1</i>   |
| <i>RASAL2</i>   | <i>ZZZ3</i>    |
| <i>RASAL3</i>   |                |
| <i>RASD2</i>    |                |
| <i>RASEF</i>    |                |
| <i>RASGEF1A</i> |                |
| <i>RASGRF1</i>  |                |
| <i>RASGRF2</i>  |                |
| <i>RASGRP3</i>  |                |
| <i>RASSF1</i>   |                |
| <i>RASSF2</i>   |                |
| <i>RASSF3</i>   |                |
| <i>RASSF4</i>   |                |
| <i>RASSF6</i>   |                |
| <i>RASSF8</i>   |                |
| <i>RASSF9</i>   |                |
| <i>RAVER2</i>   |                |
| <i>RB1</i>      |                |
| <i>RB1CC1</i>   |                |
| <i>RBAK</i>     |                |
| <i>RBBP4</i>    |                |
| <i>RBBP5</i>    |                |
| <i>RBBP6</i>    |                |
| <i>RBBP9</i>    |                |
| <i>RBFOX1</i>   |                |
| <i>RBFOX2</i>   |                |

*RBL1*  
*RBL2*  
*RBM11*  
*RBM12*  
*RBM12B*  
*RBM14*  
*RBM17*  
*RBM18*  
*RBM19*  
*RBM20*  
*RBM22*  
*RBM24*  
*RBM25*  
*RBM26*  
*RBM27*  
*RBM28*  
*RBM3*  
*RBM38*  
*RBM39*  
*RBM4*  
*RBM41*  
*RBM43*  
*RBM44*  
*RBM46*  
*RBM48*  
*RBM7*  
*RBMS1*  
*RBMS2*  
*RBMXL1*  
*RBMXL2*  
*RBMY1A1*  
*RBMY1B*  
*RBMY1D*  
*RBMY1E*  
*RBMY1F*  
*RBP2*  
*RBPMs*  
*RBPMs2*  
*RBSN*  
*RC3H2*  
*RCAN2*  
*RCAN3*  
*RCBTB1*  
*RCBTB2*

RCC2  
RCCD1  
RCHY1  
RCL1  
RCN1  
RCN2  
RCOR1  
RCOR3  
RCSD1  
RD3  
RDH10  
RDH12  
RDH13  
RDH14  
RDX  
RECK  
RECQL  
REEP1  
REEP3  
REEP5  
REG3A  
REG3G  
REG4  
REL  
RELCH  
RELL1  
RELT  
REP15  
REPS1  
REPS2  
RERE  
RERG  
RESF1  
REST  
RET  
RETREG1  
RETREG2  
REV1  
RFC1  
RFC3  
RFLNB  
RFNG  
RFPL3S  
RFPL4B

RFTN2  
RFX2  
RFX3  
RFX5  
RFX6  
RGL1  
RGL2  
RGMA  
RGMB  
RGN  
RGPD4  
RGPD5  
RGPD6  
RGPD8  
RGR  
RGS13  
RGS16  
RGS17  
RGS18  
RGS2  
RGS21  
RGS4  
RGS5  
RGS6  
RGS7  
RGS7BP  
RGS9BP  
RHBDD1  
RHEB  
RHOBTB1  
RHOBTB2  
RHOBTB3  
RHOH  
RHOJ  
RHOQ  
RHOT1  
RHPN2  
RIBC1  
RIC1  
RIC8B  
RICTOR  
RIDA  
RILPL2  
RIMBP2

RIMKLA  
RIMKLB  
RIMS2  
RIMS3  
RIMS4  
RIN2  
RINT1  
RIOK1  
RIOK2  
RIOK3  
RIOX2  
RIPK2  
RIPK4  
RIPOR2  
RIPOR3  
RIPPLY3  
RIT1  
RITA1  
RLBP1  
RLIM  
RLN1  
RLN2  
RMDN2  
RMI1  
RMI2  
RMND5A  
RNASE13  
RNASE4  
RNASEH1  
RNASEH2B  
RNASEH2C  
RNASET2  
RND3  
RNF103-CHMP3  
RNF11  
RNF111  
RNF114  
RNF125  
RNF126  
RNF13  
RNF130  
RNF138  
RNF141  
RNF144A



RNF144B  
RNF146  
RNF148  
RNF149  
RNF150  
RNF152  
RNF157  
RNF165  
RNF168  
RNF169  
RNF17  
RNF170  
RNF180  
RNF182  
RNF185  
RNF187  
RNF19A  
RNF19B  
RNF2  
RNF20  
RNF207  
RNF212  
RNF212B  
RNF213  
RNF216  
RNF217  
RNF219  
RNF26  
RNF32  
RNF34  
RNF38  
RNF4  
RNF41  
RNF44  
RNGTT  
RNLS  
RNMT  
RO60  
ROBO1  
ROBO2  
ROBO3  
ROBO4  
ROCK1  
ROCK2

ROMO1  
ROPN1  
ROR1  
ROR2  
RORA  
RORB  
RORC  
ROS1  
RP2  
RPA1  
RPA3  
RPAIN  
RPAP2  
RPAP3  
RPE  
RPE65  
RPEL1  
RPF1  
RPF2  
RPGR  
RPGRIP1L  
RPH3AL  
RPL10L  
RPL12  
RPL13  
RPL13A  
RPL14  
RPL17  
RPL22  
RPL22L1  
RPL23  
RPL23A  
RPL26L1  
RPL27A  
RPL31  
RPL36AL  
RPL37  
RPL37A  
RPL7  
RPL7L1  
RPL8  
RPL9  
RPP14  
RPP30

*RPP40*  
*RPRD1A*  
*RPRD2*  
*RPS12*  
*RPS15A*  
*RPS19*  
*RPS2*  
*RPS20*  
*RPS23*  
*RPS27A*  
*RPS27L*  
*RPS29*  
*RPS4Y1*  
*RPS6*  
*RPS6KA2*  
*RPS6KA3*  
*RPS6KA5*  
*RPS6KA6*  
*RPS6KB1*  
*RPS6KC1*  
*RPS6KL1*  
*RPTN*  
*RPUSD2*  
*RRAGC*  
*RRAGD*  
*RRAS2*  
*RREB1*  
*RRH*  
*RRM1*  
*RRM2B*  
*RRN3*  
*RRP15*  
*RRP1B*  
*RRP36*  
*RRP7A*  
*RRP8*  
*RRS1*  
*RS1*  
*RSAD2*  
*RSBN1*  
*RSBN1L*  
*RSF1*  
*RSKR*  
*RSL1D1*

RSPH3  
RSPH4A  
RSPO1  
RSPO3  
RSPRY1  
RTBDN  
RTCA  
RTF2  
RTKN2  
RTL6  
RTL8B  
RTL9  
RTN3  
RTN4  
RTN4RL1  
RTP4  
RUBCN  
RUBCNL  
RUFY1  
RUFY2  
RUFY3  
RUNDC1  
RUNDC3B  
RUNX1  
RUNX1T1  
RUNX2  
RWDD1  
RWDD2A  
RWDD2B  
RWDD4  
RXFP1  
RXYLT1  
RYBP  
RYR2  
S100A10  
S100A16  
S100A2  
S100A7A  
S100PBP  
S1PR1  
S1PR3  
S1PR5  
SAA2  
SACM1L

*SAE1*  
*SALL1*  
*SALL4*  
*SAMD1*  
*SAMD12*  
*SAMD14*  
*SAMD15*  
*SAMD3*  
*SAMD4A*  
*SAMD5*  
*SAMD8*  
*SAMD9L*  
*SAP30*  
*SAP30BP*  
*SAP30L*  
*SAR1A*  
*SAR1B*  
*SARAF*  
*SART3*  
*SASH1*  
*SASS6*  
*SATB1*  
*SATB2*  
*SAV1*  
*SAXO2*  
*SAYSD1*  
*SBF2*  
*SBSPON*  
*SC5D*  
*SCAF1*  
*SCAF4*  
*SCAF8*  
*SCAI*  
*SCAMP5*  
*SCAPER*  
*SCARA5*  
*SCARB1*  
*SCARB2*  
*SCCPDH*  
*SCD5*  
*SCEL*  
*SCFD1*  
*SCFD2*  
*SCG5*

SCGB2A1  
SCIMP  
SCIN  
SCLT1  
SCML1  
SCML2  
SCML4  
SCN11A  
SCN1A  
SCN2A  
SCN2B  
SCN3A  
SCN8A  
SCN9A  
SCNM1  
SCO1  
SCP2  
SCRG1  
SCRIB  
SCRN1  
SCRN2  
SCRN3  
SCUBE3  
SCYL1  
SCYL2  
SCYL3  
SDAD1  
SDC1  
SDC2  
SDCBP  
SDE2  
SDF2  
SDHAF1  
SDHAF3  
SDHD  
SDK1  
SDR16C5  
SEC11A  
SEC14L3  
SEC14L4  
SEC14L5  
SEC14L6  
SEC16B  
SEC22C

SEC23IP  
SEC24A  
SEC24B  
SEC24D  
SEC31B  
SEC61A2  
SEC61G  
SEC62  
SEC63  
SECISBP2L  
SEH1L  
SEL1L  
SEL1L3  
SELENOI  
SELENOK  
SELENON  
SELENOP  
SELENOS  
SELENOT  
SEM1  
SEMA3A  
SEMA3C  
SEMA3D  
SEMA4D  
SEMA4G  
SEMA5A  
SEMA6A  
SEMA6D  
SEMA7A  
SENP2  
SENP5  
SENP7  
SEPHS1  
SEPTIN10  
SEPTIN11  
SEPTIN14  
SEPTIN2  
SEPTIN3  
SEPTIN4  
SEPTIN6  
SEPTIN7  
SERAC1  
SERBP1  
SERF1A

SERF1B  
SERINC1  
SERINC3  
SERP1  
SERPINA5  
SERPINB10  
SERPINB11  
SERPINB13  
SERPINB2  
SERPINB7  
SERPINB8  
SERPINB9  
SERPINC1  
SERPINE1  
SERPING1  
SERTAD2  
SERTAD3  
SERTAD4  
SERTM1  
SESN1  
SESN2  
SESN3  
SESTD1  
SETBP1  
SETD3  
SETD4  
SETD5  
SETD7  
SETD9  
SETDB2  
SETX  
SEZ6L  
SF3A1  
SF3B1  
SF3B3  
SF3B5  
SFI1  
SFMBT1  
SFMBT2  
SFPQ  
SFRP1  
SFRP2  
SFRP4  
SFT2D2



SFT2D3  
SFTPA1  
SFTPA2  
SFXN1  
SFXN2  
SFXN5  
SGCB  
SGCD  
SGMS2  
SGO1  
SGPL1  
SGPP2  
SGSM2  
SGTA  
SGTB  
SH2B3  
SH2D1A  
SH2D1B  
SH2D4A  
SH2D4B  
SH2D7  
SH3BGR  
SH3BGRL  
SH3BGRL2  
SH3BP2  
SH3BP4  
SH3BP5  
SH3BP5L  
SH3D19  
SH3GL2  
SH3GLB1  
SH3GLB2  
SH3KBP1  
SH3PXD2B  
SH3RF1  
SH3RF2  
SH3RF3  
SH3YL1  
SHC1  
SHC3  
SHC4  
SHCBP1  
SHCBP1L  
SHE

SHH  
SHISA2  
SHISA3  
SHISA6  
SHISA7  
SHISA9  
SHISAL1  
SHLD1  
SHLD2  
SHMT1  
SHOC2  
SHPRH  
SHQ1  
SHROOM2  
SHROOM3  
SHROOM4  
SHTN1  
SIAH2  
SIAH3  
SIDT1  
SIDT2  
SIGLEC11  
SIGLEC12  
SIGLEC15  
SIGLEC8  
SIGLEC9  
SIK1  
SIK2  
SIKE1  
SIM1  
SIM2  
SIN3A  
SIPA1  
SIPA1L1  
SIRPA  
SIRPB1  
SIRPB2  
SIRT1  
SIRT3  
SIRT5  
SIRT7  
SIT1  
SIX1  
SIX3

SIX4  
SIX6  
SKA1  
SKA2  
SKA3  
SKAP2  
SKI  
SKIDA1  
SKIL  
SKP1  
SKP2  
SLA  
SLA2  
SLAIN1  
SLAIN2  
SLAMF6  
SLBP  
SLC10A1  
SLC10A2  
SLC10A3  
SLC10A6  
SLC10A7  
SLC11A1  
SLC12A2  
SLC12A3  
SLC12A5  
SLC12A6  
SLC12A7  
SLC13A1  
SLC13A3  
SLC14A1  
SLC15A2  
SLC15A4  
SLC15A5  
SLC16A1  
SLC16A13  
SLC16A14  
SLC16A2  
SLC16A6  
SLC16A7  
SLC16A9  
SLC17A2  
SLC17A4  
SLC17A6

SLC17A8  
SLC17A9  
SLC18A1  
SLC18A2  
SLC18B1  
SLC19A2  
SLC1A1  
SLC1A2  
SLC1A3  
SLC1A4  
SLC1A5  
SLC1A6  
SLC1A7  
SLC20A2  
SLC22A1  
SLC22A10  
SLC22A15  
SLC22A2  
SLC22A9  
SLC23A1  
SLC23A2  
SLC24A1  
SLC24A2  
SLC24A4  
SLC24A5  
SLC25A10  
SLC25A12  
SLC25A15  
SLC25A16  
SLC25A17  
SLC25A18  
SLC25A21  
SLC25A21-AS1  
SLC25A23  
SLC25A24  
SLC25A25  
SLC25A26  
SLC25A27  
SLC25A30  
SLC25A31  
SLC25A32  
SLC25A36  
SLC25A37  
SLC25A38

SLC25A4  
SLC25A40  
SLC25A44  
SLC25A46  
SLC25A5  
SLC26A1  
SLC26A10  
SLC26A2  
SLC26A4  
SLC26A7  
SLC26A8  
SLC26A9  
SLC27A4  
SLC28A1  
SLC28A3  
SLC29A4  
SLC2A1  
SLC2A10  
SLC2A12  
SLC2A13  
SLC2A14  
SLC2A2  
SLC2A3  
SLC2A9  
SLC30A1  
SLC30A10  
SLC30A2  
SLC30A4  
SLC30A5  
SLC30A6  
SLC30A7  
SLC30A8  
SLC30A9  
SLC31A1  
SLC31A2  
SLC32A1  
SLC34A1  
SLC35A1  
SLC35A5  
SLC35B3  
SLC35B4  
SLC35C2  
SLC35D1  
SLC35D2

SLC35E1  
SLC35E3  
SLC35F1  
SLC35F2  
SLC35F3  
SLC35F5  
SLC35F6  
SLC35G1  
SLC35G3  
SLC36A1  
SLC36A2  
SLC36A4  
SLC37A3  
SLC38A1  
SLC38A11  
SLC38A2  
SLC38A4  
SLC38A7  
SLC38A9  
SLC39A1  
SLC39A11  
SLC39A14  
SLC39A2  
SLC39A6  
SLC39A8  
SLC39A9  
SLC3A1  
SLC41A2  
SLC41A3  
SLC43A2  
SLC43A3  
SLC44A1  
SLC44A5  
SLC45A4  
SLC46A3  
SLC49A4  
SLC4A1  
SLC4A10  
SLC4A4  
SLC4A5  
SLC4A7  
SLC4A8  
SLC5A1  
SLC5A10

SLC5A12  
SLC5A3  
SLC5A6  
SLC5A7  
SLC5A8  
SLC6A1  
SLC6A11  
SLC6A15  
SLC6A17  
SLC6A20  
SLC6A5  
SLC6A8  
SLC7A1  
SLC7A11  
SLC7A14  
SLC7A2  
SLC7A6  
SLC7A6OS  
SLC8A1  
SLC8B1  
SLC9A4  
SLC9A6  
SLC9A7  
SLC9A8  
SLC9A9  
SLC9B1  
SLC9B2  
SLC9C1  
SLCO1B1  
SLCO1C1  
SLCO2B1  
SLCO3A1  
SLCO4C1  
SLCO5A1  
SLF1  
SLF2  
SLFN11  
SLFN12L  
SLFN13  
SLFN5  
SLIT1  
SLIT2  
SLITRK1  
SLITRK3

SLK  
SLMAP  
SLU7  
SLX4IP  
SMAD1  
SMAD2  
SMAD3  
SMAD4  
SMAD5  
SMAD7  
SMAD9  
SMAP1  
SMAP2  
SMARCA1  
SMARCA2  
SMARCA5  
SMARCAD1  
SMARCC1  
SMARCE1  
SMC1B  
SMC2  
SMC3  
SMC4  
SMC5  
SMC6  
SMCHD1  
SMCO3  
SMCR8  
SMDT1  
SMG1  
SMG5  
SMG7  
SMIM12  
SMIM13  
SMIM14  
SMIM15  
SMIM18  
SMIM19  
SMIM21  
SMIM30  
SMIM6  
SMIM7  
SMIM8  
SMKR1



SMLR1  
SMN1  
SMN2  
SMNDC1  
SMO  
SMR3A  
SMS  
SMTNL2  
SMU1  
SMUG1  
SMURF1  
SMURF2  
SMYD2  
SNAI1  
SNAI2  
SNAP23  
SNAP25  
SNAP29  
SNAP47  
SNAP91  
SNAPC1  
SNAPC3  
SNAPC5  
SNAPIN  
SNCAIP  
SND1  
SNED1  
SNF8  
SNIP1  
SNN  
SNRK  
SNRNP27  
SNRNP40  
SNRNP48  
SNRPD1  
SNRPD3  
SNRPF  
SNRPG  
SNTB2  
SNX1  
SNX10  
SNX13  
SNX16  
SNX18

SNX19  
SNX2  
SNX22  
SNX24  
SNX25  
SNX27  
SNX30  
SNX4  
SNX9  
SOAT1  
SOBP  
SOCS2  
SOCS3  
SOCS4  
SOCS5  
SOCS6  
SOD2  
SOGA1  
SOHLH1  
SOHLH2  
SON  
SORBS1  
SORBS2  
SORCS1  
SORCS2  
SORD  
SORL1  
SORT1  
SOS2  
SOST  
SOSTDC1  
SOWAHA  
SOWAHB  
SOWAHC  
SOX1  
SOX11  
SOX12  
SOX13  
SOX21  
SOX30  
SOX4  
SOX5  
SOX7  
SP1

SP100  
SP110  
SP140L  
SP2  
SP3  
SP4  
SP8  
SP9  
SPA17  
SPACA1  
SPAG1  
SPAG11A  
SPAG16  
SPAG6  
SPAG9  
SPAM1  
SPANXN1  
SPARC  
SPARCL1  
SPATA13  
SPATA17  
SPATA18  
SPATA2  
SPATA22  
SPATA33  
SPATA4  
SPATA5  
SPATA6  
SPATA9  
SPATS2  
SPATS2L  
SPC24  
SPC25  
SPCS1  
SPCS2  
SPCS3  
SPDYE1  
SPDYE3  
SPECC1  
SPEF2  
SPEN  
SPESP1  
SPG21  
SPG7

SPHAR  
SPHKAP  
SPIC  
SPICE1  
SPIDR  
SPIN1  
SPIN3  
SPIN4  
SPINT2  
SPIRE1  
SPOCK1  
SPOCK2  
SPOCK3  
SPOPL  
SPOUT1  
SPPL2A  
SPPL2C  
SPRED1  
SPRED2  
SPRY1  
SPRY3  
SPRY4  
SPRYD4  
SPRYD7  
SPTBN1  
SPTBN2  
SPTLC1  
SPTLC2  
SPTLC3  
SPTSSA  
SPTY2D1  
SPX  
SRA1  
SRC  
SRCAP  
SRD5A1  
SRD5A3  
SREK1  
SREK1IP1  
SRFBP1  
SRGAP1  
SRGAP3  
SRGN  
SRI

SRL  
SRP19  
SRP9  
SRPK2  
SRPRA  
SRPRB  
SRPX2  
SRR  
SRRD  
SRRM1  
SRRM4  
SRSF1  
SRSF10  
SRSF11  
SRSF12  
SRSF2  
SRSF3  
SRSF4  
SRSF6  
SRSF7  
SRSF9  
SRXN1  
SRY  
SS18  
SS18L1  
SSB  
SSBP2  
SSBP3  
SSH2  
SSPN  
SSR1  
SSR3  
SSR4P1  
SSTR2  
SSX1  
SSX2  
SSX2IP  
SSX3  
ST13  
ST18  
ST3GAL6  
ST6GAL1  
ST6GAL2  
ST6GALNAC3

ST6GALNAC5

ST7L

ST8SIA1

ST8SIA2

ST8SIA3

ST8SIA4

ST8SIA6

STAC

STAC2

STAG1

STAG2

STAM

STAM2

STAMBP

STAMBPL1

STAP1

STARD13

STARD3NL

STARD4

STARD7

STARD9

STAT1

STAT2

STAT3

STAT5B

STATH

STAU1

STAU2

STC1

STC2

STEAP1

STEAP2

STEAP3

STEAP4

STIM1

STIM2

STK10

STK16

STK17B

STK24

STK26

STK3

STK32A

STK32B

STK32C  
STK35  
STK38L  
STK39  
STK40  
STKLD1  
STMN2  
STMND1  
STMP1  
STN1  
STOM  
STOML1  
STOML3  
STON2  
STOX2  
STRADA  
STRADB  
STRIP1  
STRIP2  
STRN  
STRN3  
STRN4  
STS  
STT3A  
STT3B  
STUM  
STX11  
STX16  
STX17  
STX1A  
STX1B  
STX2  
STX3  
STX6  
STX7  
STXBP1  
STXBP3  
STXBP4  
STXBP5  
STXBP5L  
STXBP6  
STYK1  
STYX  
STYXL1

SUB1  
SUCLG1  
SUCLG2  
SUCNR1  
SUCO  
SUFU  
SUGCT  
SUGT1  
SULF1  
SULF2  
SULT1B1  
SULT1C2  
SULT1C4  
SULT1E1  
SULT4A1  
SUMO1  
SUMO2  
SUMO3  
SUOX  
SUPT3H  
SUPT7L  
SURF1  
SURF4  
SURF6  
SUSD1  
SUSD5  
SUSD6  
SUV39H2  
SUZ12  
SV2A  
SV2B  
SV2C  
SVIP  
SWAP70  
SWT1  
SYAP1  
SYCP2  
SYF2  
SYK  
SYN1  
SYN3  
SYNC  
SYNCRIP  
SYNDIG1



SYNE3  
SYNGR3  
SYNJ1  
SYNJ2  
SYNJ2BP  
SYNM  
SYNPO  
SYNPO2  
SYNPO2L  
SYNPR  
SYPL1  
SYS1  
SYT1  
SYT10  
SYT11  
SYT13  
SYT15  
SYT2  
SYT4  
SYT5  
SYT6  
SYT7  
SYT9  
SYTL3  
SZRD1  
TAB1  
TAB3  
TAC1  
TACO1  
TACR1  
TACR3  
TADA1  
TADA2B  
TAF11  
TAF1A  
TAF1B  
TAF1D  
TAF2  
TAF3  
TAF4B  
TAF5  
TAF5L  
TAF7  
TAF8

TAF9B  
TAF A1  
TAF A2  
TAF A3  
TAF A4  
TAGAP  
TAL1  
TAL2  
TANC1  
TANC2  
TANGO6  
TANK  
TAOK1  
TAOK3  
TAP2  
TAPT1  
TARDBP  
TARSL2  
TAS2R20  
TAS2R30  
TAS2R4  
TAS2R5  
TASOR  
TASOR2  
TASP1  
TAT  
TATDN1  
TATDN2  
TATDN3  
TAX1BP1  
TBC1D1  
TBC1D12  
TBC1D14  
TBC1D15  
TBC1D16  
TBC1D19  
TBC1D20  
TBC1D22A  
TBC1D23  
TBC1D24  
TBC1D25  
TBC1D30  
TBC1D32  
TBC1D4

TBC1D5  
TBC1D8  
TBC1D8B  
TBC1D9  
TBCA  
TBCC  
TBCEL  
TBK1  
TBL1X  
TBL1XR1  
TBPL1  
TBPL2  
TBRG1  
TBX15  
TBX18  
TBX20  
TBX3  
TBX5  
TBX6  
TC2N  
TCAF1  
TCAF2  
TCEA1  
TCEAL4  
TCEANC  
TCEANC2  
TCF12  
TCF15  
TCF21  
TCF23  
TCF24  
TCF4  
TCF7  
TCF7L2  
TCFL5  
TCHHL1  
TCHP  
TCIM  
TCIRG1  
TCL1A  
TCN2  
TCOF1  
TCP1  
TCP11L2

TCTA  
TCTE1  
TCTEX1D1  
TCTN1  
TDG  
TDGF1  
TDO2  
TDP2  
TDRD15  
TDRD6  
TDRP  
TEC  
TECPR1  
TECPR2  
TECRL  
TECTB  
TEDDM1  
TEF  
TEFM  
TEKT1  
TENM1  
TENM2  
TENM3  
TENM4  
TENT2  
TENT4A  
TENT5C  
TENT5D  
TEP1  
TEPP  
TEPSIN  
TERB2  
TERF1  
TERF2  
TERF2IP  
TES  
TESK1  
TESMIN  
TESPA1  
TET1  
TET2  
TET3  
TEX19  
TEX2

TEX22  
TEX35  
TEX36  
TF  
TFAM  
TFAP2B  
TFAP2C  
TFB2M  
TFCP2L1  
TFDP1  
TFDP2  
TFE3  
TFEC  
TFF3  
TFG  
TFIP11  
TFPI  
TFPI2  
TGFA  
TGFB2  
TGFB3  
TGFB1  
TGFB1  
TGFB2  
TGFB3  
TGFB1  
TGFB1  
TGFB2  
TGFB3  
TGIF1  
TGIF2LX  
TGIF2LY  
TGIF2-RAB5IF  
TGM2  
TGM4  
TGM5  
TGOLN2  
TGS1  
THADA  
THAP1  
THAP12  
THAP2  
THAP3  
THAP6  
THAP9  
THBD  
THBS1  
THBS2

THBS4  
THEM4  
THEMIS2  
THG1L  
THNSL1  
THOC3  
THOC5  
THOC7  
THRAP3  
THRB  
THSD4  
THSD7A  
THSD7B  
THTPA  
THUMPD2  
THUMPD3  
TIA1  
TIAL1  
TIFA  
TIFAB  
TIGAR  
TIGD2  
TIGD4  
TIGD6  
TIGIT  
TIMD4  
TIMELESS  
TIMM10  
TIMM17A  
TIMM29  
TIMM8A  
TIMM9  
TIMP3  
TIMP4  
TIPRL  
TIRAP  
TJP2  
TK2  
TKFC  
TKTL1  
TLCD2  
TLCD4  
TLCD5  
TLE3

TLE4  
TLK1  
TLK2  
TLL1  
TLL2  
TLN2  
TLNRD1  
TLR3  
TLR6  
TLR7  
TLX1  
TLX3  
TM2D2  
TM2D3  
TM4SF1  
TM4SF18  
TM4SF20  
TM4SF5  
TM6SF1  
TM9SF2  
TM9SF3  
TMA16  
TMA7  
TMBIM4  
TMBIM6  
TMC2  
TMC6  
TMC7  
TMCC1  
TMCC3  
TMC01  
TMC03  
TMED10  
TMED2  
TMED4  
TMED5  
TMED7  
TMED8  
TMED9  
TMEFF1  
TMEFF2  
TMEM100  
TMEM104  
TMEM106B

TMEM106C  
TMEM108  
TMEM11  
TMEM116  
TMEM117  
TMEM120B  
TMEM121B  
TMEM127  
TMEM128  
TMEM130  
TMEM132A  
TMEM132B  
TMEM134  
TMEM135  
TMEM144  
TMEM14B  
TMEM151A  
TMEM151B  
TMEM154  
TMEM156  
TMEM161B  
TMEM163  
TMEM164  
TMEM165  
TMEM167A  
TMEM167B  
TMEM168  
TMEM169  
TMEM170A  
TMEM170B  
TMEM174  
TMEM175  
TMEM178A  
TMEM178B  
TMEM181  
TMEM182  
TMEM183A  
TMEM184A  
TMEM184B  
TMEM184C  
TMEM185A  
TMEM185B  
TMEM186  
TMEM189



TMEM19  
TMEM192  
TMEM196  
TMEM200A  
TMEM200C  
TMEM207  
TMEM209  
TMEM213  
TMEM215  
TMEM220  
TMEM221  
TMEM229A  
TMEM230  
TMEM231  
TMEM232  
TMEM233  
TMEM234  
TMEM236  
TMEM237  
TMEM239  
TMEM241  
TMEM242  
TMEM243  
TMEM245  
TMEM246  
TMEM248  
TMEM25  
TMEM251  
TMEM252  
TMEM254  
TMEM255A  
TMEM26  
TMEM260  
TMEM263  
TMEM267  
TMEM273  
TMEM30A  
TMEM30B  
TMEM33  
TMEM35A  
TMEM37  
TMEM38A  
TMEM39A  
TMEM40

TMEM41A  
TMEM43  
TMEM44  
TMEM47  
TMEM50A  
TMEM50B  
TMEM53  
TMEM62  
TMEM63C  
TMEM64  
TMEM65  
TMEM67  
TMEM68  
TMEM69  
TMEM70  
TMEM72  
TMEM74  
TMEM86A  
TMEM87A  
TMEM87B  
TMEM97  
TMEM98  
TMEM9B  
TMF1  
TMIE  
TMLHE  
TMOD1  
TMOD2  
TMOD3  
TMPO  
TMPPE  
TMPRSS11A  
TMPRSS11B  
TMPRSS11D  
TMPRSS11E  
TMPRSS12  
TMPRSS13  
TMPRSS15  
TMPRSS2  
TMPRSS4  
TMPRSS5  
TMSB15B  
TMTC1  
TMTC2

TMTC3  
TMTC4  
TMX1  
TMX3  
TMX4  
TNF  
TNFAIP6  
TNFAIP8  
TNFAIP8L1  
TNFAIP8L3  
TNFRSF10A  
TNFRSF10B  
TNFRSF10C  
TNFRSF11A  
TNFRSF11B  
TNFRSF13C  
TNFRSF14  
TNFRSF19  
TNFRSF1B  
TNFRSF25  
TNFRSF8  
TNFRSF9  
TNFSF10  
TNFSF13B  
TNFSF14  
TNFSF15  
TNFSF4  
TNFSF8  
TNIK  
TNIP2  
TNIP3  
TNKS  
TNKS1BP1  
TNKS2  
TNN  
TNNI1  
TNPO1  
TNR  
TNRC6A  
TNRC6B  
TNRC6C  
TNS3  
TNS4  
TOGARAM1

TOGARAM2

TOM1L1

TOMM20

TOMM20L

TOMM22

TOMM40

TOMM6

TOP1

TOP2A

TOPORS

TOR1A

TOR1AIP1

TOR1AIP2

TOR1B

TOX

TOX2

TOX3

TP53

TP53BP2

TP53I11

TP53INP1

TP53INP2

TP53TG5

TP63

TPBGL

TPCN1

TPCN2

TPD52

TPD52L1

TPD52L3

TPGS2

TPH1

TPH2

TPK1

TPM3

TPMT

TPP1

TPPP

TPR

TPRG1

TPRG1L

TPRX1

TPRXL

TPST1

TPST2  
TPT1  
TRA2B  
TRABD  
TRABD2A  
TRABD2B  
TRAF1  
TRAF2  
TRAF3  
TRAF3IP1  
TRAF3IP3  
TRAF4  
TRAF5  
TRAF6  
TRAK1  
TRAK2  
TRAM2  
TRAPPC10  
TRAPPC13  
TRAPPC2B  
TRAPPC4  
TRAPPC6B  
TRAPPC8  
TRAPPC9  
TRAT1  
TRDMT1  
TRDN  
TREM1  
TREML2  
TRERF1  
TRHDE  
TRIAP1  
TRIB1  
TRIM13  
TRIM14  
TRIM2  
TRIM22  
TRIM23  
TRIM24  
TRIM25  
TRIM29  
TRIM33  
TRIM35  
TRIM36

TRIM37  
TRIM38  
TRIM4  
TRIM40  
TRIM41  
TRIM44  
TRIM45  
TRIM5  
TRIM58  
TRIM6  
TRIM63  
TRIM64B  
TRIM65  
TRIM66  
TRIM67  
TRIM7  
TRIM71  
TRIM72  
TRIML2  
TRIO  
TRIP11  
TRIP12  
TRIP13  
TRIP4  
TRIQK  
TRMO  
TRMT10A  
TRMT10B  
TRMT10C  
TRMT12  
TRMT13  
TRMT1L  
TRMT44  
TRMT5  
TRMT9B  
TRMU  
TRNT1  
TRPA1  
TRPC3  
TRPC4  
TRPC5  
TRPC6  
TRPM1  
TRPM3

TRPM4  
TRPM6  
TRPM7  
TRPS1  
TRPV1  
TRPV3  
TRUB1  
TSC22D1  
TSC22D2  
TSC22D3  
TSEN2  
TSFM  
TSHR  
TSHZ1  
TSHZ2  
TSHZ3  
TSKU  
TSLP  
TSN  
TSNAX  
TSPAN11  
TSPAN12  
TSPAN14  
TSPAN15  
TSPAN2  
TSPAN3  
TSPAN5  
TSPAN6  
TSPAN9  
TSPYL1  
TSPYL6  
TSR1  
TSTD2  
TTBK2  
TTC14  
TTC17  
TTC19  
TTC21B  
TTC22  
TTC23  
TTC26  
TTC28  
TTC29  
TTC30A

TTC30B  
TTC31  
TTC32  
TTC33  
TTC37  
TTC39A  
TTC39B  
TTC4  
TTC5  
TTC7A  
TTC8  
TTC9  
TTF1  
TTF2  
TTK  
TTL  
TTLL11  
TTLL5  
TTLL7  
TTLL9  
TTN  
TPA  
TPAL  
TTR  
TUB  
TUBA1B  
TUBB1  
TUBB6  
TUBE1  
TUBGCP3  
TUFT1  
TULP3  
TULP4  
TUSC1  
TUSC2  
TUSC3  
TUT4  
TUT7  
TVP23A  
TVP23C  
TWF1  
TWIST1  
TWISTNB  
TWSG1



TXK  
TXLNA  
TXLNG  
TXNDC15  
TXNDC16  
TXNDC2  
TXNDC8  
TXNDC9  
TXNL1  
TXNL4B  
TXNRD1  
TXNRD2  
TYMS  
TYRO3  
TYRP1  
TYW1  
TYW3  
TYW5  
UACA  
UAP1  
UBA2  
UBA5  
UBA6  
UBAP2L  
UBASH3B  
UBB  
UBD  
UBE2A  
UBE2B  
UBE2D1  
UBE2D2  
UBE2D3  
UBE2D4  
UBE2E3  
UBE2G1  
UBE2H  
UBE2I  
UBE2J1  
UBE2K  
UBE2L3  
UBE2N  
UBE2Q1  
UBE2Q2  
UBE2QL1

UBE2R2  
UBE2S  
UBE2T  
UBE2U  
UBE2V2  
UBE2W  
UBE3A  
UBE3B  
UBE3D  
UBE4A  
UBE4B  
UBFD1  
UBIAD1  
UBL3  
UBL4A  
UBLCP1  
UBN2  
UBP1  
UBQLN1  
UBQLN4  
UBR1  
UBR2  
UBR5  
UBR7  
UBTD2  
UBXN10  
UBXN2A  
UBXN2B  
UBXN4  
UBXN7  
UCHL3  
UCHL5  
UCK1  
UCK2  
UCKL1  
UCP1  
UCP3  
UEVLD  
UFD1  
UFL1  
UFM1  
UGCG  
UGDH  
UGGT1

UGP2  
UGT2A1  
UGT2A3  
UGT2B10  
UGT2B11  
UGT2B15  
UGT2B4  
UGT3A1  
UGT8  
UHMK1  
UHRF1BP1  
UHRF1BP1L  
UIMC1  
ULBP1  
ULBP3  
ULK2  
UMODL1  
UMODL1-AS1  
UMPS  
UNC119  
UNC119B  
UNC13A  
UNC13B  
UNC5C  
UNC5D  
UNC80  
UNC93A  
UNKL  
UPF3B  
UPK1B  
UPP1  
UPP2  
UPRT  
UQCR11  
UQCRB  
UQCRFS1  
URB1  
URI1  
URM1  
USB1  
USF3  
USH2A  
USHBP1  
USP1

USP10  
USP12  
USP13  
USP14  
USP15  
USP18  
USP22  
USP24  
USP25  
USP3  
USP31  
USP32  
USP37  
USP38  
USP42  
USP44  
USP46  
USP47  
USP48  
USP49  
USP51  
USP53  
USP6NL  
USP7  
USP8  
USP9X  
USPL1  
UST  
UTP14C  
UTP15  
UTP23  
UTP25  
UTP3  
UTP4  
UTRN  
UTS2  
UTY  
UVRAG  
UVSSA  
UXS1  
VAMP1  
VAMP4  
VAMP7  
VANGL1

VANGL2  
VAPA  
VAPB  
VASH2  
VASP  
VAT1  
VAT1L  
VAV2  
VAV3  
VAX1  
VBP1  
VCAM1  
VCAN  
VCP  
VCPIP1  
VDAC3  
VEGFA  
VEZF1  
VEZT  
VGLL3  
VGLL4  
VHL  
VHLL  
VIL1  
VIP  
VIPAS39  
VIPR1  
VIRMA  
VKORC1L1  
VLDLR  
VMA21  
VMP1  
VN1R1  
VNN1  
VNN2  
VPS13A  
VPS13B  
VPS13C  
VPS18  
VPS26A  
VPS26B  
VPS26C  
VPS29  
VPS36

VPS37A  
VPS41  
VPS4A  
VPS4B  
VPS50  
VPS52  
VPS53  
VRK1  
VRK2  
VSIG1  
VSIG10  
VSIG10L  
VSIG4  
VSTM2A  
VSTM4  
VSTM5  
VSX1  
VTA1  
VTI1A  
VWA1  
VWA2  
VWA3A  
VWA3B  
VWA5A  
VWA5B1  
VWA8  
VWC2  
VWC2L  
VWDE  
VXN  
WAC  
WAPL  
WARS  
WARS2  
WASF1  
WASF3  
WASHC2A  
WASHC4  
WASL  
WBP11  
WBP1L  
WBP2NL  
WBP4  
WDCP

WDFY2  
WDHD1  
WDPCP  
WDR12  
WDR13  
WDR20  
WDR25  
WDR3  
WDR31  
WDR33  
WDR35  
WDR4  
WDR41  
WDR44  
WDR45B  
WDR47  
WDR48  
WDR59  
WDR5B  
WDR7  
WDR70  
WDR73  
WDR75  
WDR76  
WDR77  
WDR78  
WDR82  
WDR89  
WDR92  
WDR93  
WDTC1  
WDYHV1  
WFDC13  
WFDC5  
WHAMM  
WIF1  
WIPF1  
WIPF2  
WIP12  
WLS  
WNK1  
WNK2  
WNK3  
WNT16

WNT2  
WNT2B  
WNT3  
WNT4  
WNT8A  
WNT8B  
WNT9B  
WRN  
WSB1  
WSB2  
WSCD1  
WT1  
WTAP  
WTIP  
WWC2  
WWC3  
WWP1  
WWP2  
WWTR1  
XAF1  
XBP1  
XCL1  
XCL2  
XCR1  
XIAP  
XK  
XKR4  
XKR7  
XKR9  
XPNPEP2  
XPNPEP3  
XPO1  
XPOT  
XPR1  
XRCC2  
XRCC4  
XRN1  
XRN2  
XRR1  
XXYLT1  
XYLB  
XYLT1  
XYLT2  
YAE1



YAF2  
YAP1  
YARS  
YARS2  
YEATS2  
YEATS4  
YES1  
YIPF4  
YIPF6  
YKT6  
YME1L1  
YOD1  
YPEL1  
YPEL2  
YPEL5  
YTHDC2  
YTHDF1  
YTHDF2  
YTHDF3  
YWHAG  
YWHAH  
YY1  
ZADH2  
ZBBX  
ZBED1  
ZBED3  
ZBED4  
ZBED6  
ZBED8  
ZBED9  
ZBTB1  
ZBTB11  
ZBTB12  
ZBTB14  
ZBTB16  
ZBTB2  
ZBTB20  
ZBTB21  
ZBTB24  
ZBTB25  
ZBTB26  
ZBTB3  
ZBTB33  
ZBTB34

ZBTB37  
ZBTB38  
ZBTB39  
ZBTB40  
ZBTB41  
ZBTB42  
ZBTB43  
ZBTB44  
ZBTB46  
ZBTB5  
ZBTB6  
ZBTB7B  
ZBTB7C  
ZBTB8A  
ZBTB8B  
ZC2HC1A  
ZC2HC1C  
ZC3H12B  
ZC3H12C  
ZC3H13  
ZC3H14  
ZC3H15  
ZC3H4  
ZC3H7B  
ZC3H8  
ZC3HAV1  
ZC3HAV1L  
ZC3HC1  
ZC4H2  
ZCCHC10  
ZCCHC14  
ZCCHC17  
ZCCHC2  
ZCCHC24  
ZCCHC4  
ZCCHC7  
ZCRB1  
ZCWPW2  
ZDBF2  
ZDHHC13  
ZDHHC14  
ZDHHC15  
ZDHHC16  
ZDHHC17

ZDHC2  
ZDHC20  
ZDHC21  
ZDHC23  
ZDHC3  
ZDHC6  
ZDHC7  
ZDHC9  
ZEB1  
ZEB2  
ZER1  
ZFAND2A  
ZFAND3  
ZFAND4  
ZFAND5  
ZFAND6  
ZFAT  
ZFC3H1  
ZFH2  
ZFH3  
ZFP1  
ZFP14  
ZFP28  
ZFP3  
ZFP30  
ZFP36L1  
ZFP36L2  
ZFP37  
ZFP42  
ZFP62  
ZFP64  
ZFP69  
ZFP69B  
ZFP82  
ZFP90  
ZFP91  
ZFPM2  
ZFR  
ZFX  
ZFY  
ZFYVE1  
ZFYVE16  
ZFYVE21  
ZFYVE28

ZG16  
ZGPAT  
ZHX1  
ZIC1  
ZIC2  
ZIC3  
ZIK1  
ZIM3  
ZKSCAN1  
ZKSCAN2  
ZKSCAN3  
ZKSCAN4  
ZKSCAN7  
ZKSCAN8  
ZMAT2  
ZMAT3  
ZMAT4  
ZMIZ1  
ZMPSTE24  
ZMYM1  
ZMYM2  
ZMYM4  
ZMYM6  
ZMYND11  
ZMYND8  
ZNF10  
ZNF100  
ZNF106  
ZNF112  
ZNF117  
ZNF132  
ZNF134  
ZNF136  
ZNF138  
ZNF14  
ZNF140  
ZNF141  
ZNF143  
ZNF146  
ZNF148  
ZNF154  
ZNF157  
ZNF160  
ZNF169

ZNF174  
ZNF175  
ZNF180  
ZNF182  
ZNF184  
ZNF185  
ZNF189  
ZNF19  
ZNF197  
ZNF20  
ZNF200  
ZNF207  
ZNF208  
ZNF212  
ZNF214  
ZNF215  
ZNF217  
ZNF222  
ZNF223  
ZNF224  
ZNF226  
ZNF230  
ZNF234  
ZNF235  
ZNF236  
ZNF236-DT  
ZNF24  
ZNF248  
ZNF25  
ZNF250  
ZNF251  
ZNF253  
ZNF256  
ZNF260  
ZNF264  
ZNF267  
ZNF268  
ZNF273  
ZNF274  
ZNF275  
ZNF277  
ZNF28  
ZNF280C  
ZNF280D

ZNF281  
ZNF282  
ZNF284  
ZNF287  
ZNF292  
ZNF3  
ZNF302  
ZNF317  
ZNF318  
ZNF319  
ZNF320  
ZNF322  
ZNF324B  
ZNF326  
ZNF329  
ZNF330  
ZNF331  
ZNF333  
ZNF334  
ZNF337  
ZNF33A  
ZNF33B  
ZNF345  
ZNF346  
ZNF347  
ZNF35  
ZNF354A  
ZNF354B  
ZNF354C  
ZNF365  
ZNF366  
ZNF367  
ZNF37A  
ZNF382  
ZNF383  
ZNF384  
ZNF385B  
ZNF385D  
ZNF391  
ZNF394  
ZNF395  
ZNF396  
ZNF397  
ZNF404

ZNF407  
ZNF410  
ZNF415  
ZNF417  
ZNF419  
ZNF420  
ZNF426  
ZNF429  
ZNF43  
ZNF430  
ZNF431  
ZNF432  
ZNF436  
ZNF436-AS1  
ZNF439  
ZNF440  
ZNF441  
ZNF442  
ZNF443  
ZNF444  
ZNF446  
ZNF449  
ZNF45  
ZNF451  
ZNF460  
ZNF461  
ZNF462  
ZNF468  
ZNF470  
ZNF471  
ZNF480  
ZNF483  
ZNF484  
ZNF485  
ZNF486  
ZNF487  
ZNF490  
ZNF491  
ZNF493  
ZNF497  
ZNF501  
ZNF503  
ZNF507  
ZNF510

ZNF512  
ZNF513  
ZNF516  
ZNF518B  
ZNF519  
ZNF521  
ZNF525  
ZNF526  
ZNF527  
ZNF529  
ZNF532  
ZNF536  
ZNF540  
ZNF546  
ZNF547  
ZNF548  
ZNF549  
ZNF550  
ZNF551  
ZNF554  
ZNF555  
ZNF556  
ZNF557  
ZNF558  
ZNF559-ZNF177  
ZNF560  
ZNF561  
ZNF561-AS1  
ZNF562  
ZNF563  
ZNF567  
ZNF572  
ZNF574  
ZNF576  
ZNF577  
ZNF578  
ZNF583  
ZNF584  
ZNF585A  
ZNF585B  
ZNF586  
ZNF587  
ZNF592  
ZNF597



ZNF605  
ZNF607  
ZNF608  
ZNF609  
ZNF610  
ZNF611  
ZNF613  
ZNF614  
ZNF616  
ZNF618  
ZNF619  
ZNF620  
ZNF621  
ZNF623  
ZNF624  
ZNF626  
ZNF627  
ZNF639  
ZNF641  
ZNF644  
ZNF648  
ZNF649  
ZNF652  
ZNF654  
ZNF655  
ZNF660  
ZNF667  
ZNF669  
ZNF670  
ZNF671  
ZNF674  
ZNF675  
ZNF680  
ZNF681  
ZNF684  
ZNF688  
ZNF689  
ZNF695  
ZNF696  
ZNF697  
ZNF699  
ZNF70  
ZNF701  
ZNF703

ZNF704  
ZNF705A  
ZNF705D  
ZNF706  
ZNF708  
ZNF709  
ZNF711  
ZNF713  
ZNF716  
ZNF717  
ZNF720  
ZNF724  
ZNF726  
ZNF736  
ZNF737  
ZNF738  
ZNF740  
ZNF749  
ZNF75A  
ZNF763  
ZNF765  
ZNF766  
ZNF770  
ZNF772  
ZNF773  
ZNF774  
ZNF776  
ZNF778  
ZNF780A  
ZNF782  
ZNF785  
ZNF789  
ZNF79  
ZNF790  
ZNF791  
ZNF793  
ZNF799  
ZNF80  
ZNF804B  
ZNF81  
ZNF813  
ZNF814  
ZNF823  
ZNF827

ZNF829  
ZNF830  
ZNF831  
ZNF84  
ZNF843  
ZNF844  
ZNF845  
ZNF850  
ZNF852  
ZNF853  
ZNF860  
ZNF862  
ZNF875  
ZNF879  
ZNF891  
ZNF90  
ZNF92  
ZNF93  
ZNF99  
ZNHIT1  
ZNHIT6  
ZNR1  
ZNR2  
ZNR3  
ZP1  
ZPLD1  
ZPR1  
ZRANB1  
ZRANB2  
ZRANB3  
ZSCAN1  
ZSCAN12  
ZSCAN16  
ZSCAN18  
ZSCAN2  
ZSCAN22  
ZSCAN23  
ZSCAN25  
ZSCAN29  
ZSCAN30  
ZSCAN31  
ZSWIM4  
ZSWIM6  
ZSWIM7

*ZUP1*  
*ZW10*  
*ZWILCH*  
*ZWINT*  
*ZXDA*  
*ZXDB*  
*ZXDC*  
*ZYG11B*  
*ZZEF1*  
*ZZZ3*

---

miRPathDB V2.0 database.

**Table S2. Differentially Expressed genes identified in GSE62452 and GSE28735**

| GSE62452 |          |          |                 |                                                                 |
|----------|----------|----------|-----------------|-----------------------------------------------------------------|
| ID       | P.Value  | logFC    | Gene.symbol     | Gene.title                                                      |
| 7917455  | 1.34E-02 | 1.34E-01 | <i>sep-15</i>   | 15 kDa selenoprotein                                            |
| 7930498  | 6.85E-12 | 1.42     | <i>ACSL5</i>    | acyl-CoA synthetase long-chain family member 5                  |
| 7934906  | 1.69E-09 | 1.23     | <i>ACTA2</i>    | actin, alpha 2, smooth muscle, aorta                            |
| 8145293  | 2.25E-11 | 1.23     | <i>ADAM28</i>   | ADAM metallopeptidase domain 28                                 |
| 8146000  | 5.52E-12 | 1.2      | <i>ADAM9</i>    | ADAM metallopeptidase domain 9                                  |
| 8111387  | 2.27E-12 | 1.14     | <i>ADAMTS12</i> | ADAM metallopeptidase with thrombospondin type 1 motif 12       |
| 8126820  | 3.62E-12 | 1.38     | <i>ADGRF1</i>   | adhesion G protein-coupled receptor F1                          |
| 8132557  | 4.33E-11 | 1.07     | <i>AEBP1</i>    | AE binding protein 1                                            |
| 8138381  | 5.39E-14 | 1.86     | <i>AGR2</i>     | anterior gradient 2, protein disulphide isomerase family member |
| 7981514  | 7.88E-19 | 1.51     | <i>AHNAK2</i>   | AHNAK nucleoprotein 2                                           |
| 7934898  | 2.78E-08 | 1.14     | <i>ANKRD22</i>  | ankyrin repeat domain 22                                        |
| 8132318  | 5.39E-13 | 1.47     | <i>ANLN</i>     | anillin actin binding protein                                   |
| 7942135  | 7.97E-15 | 1.2      | <i>ANO1</i>     | anoctamin 1                                                     |
| 8042439  | 3.30E-15 | 1.55     | <i>ANTXR1</i>   | anthrax toxin receptor 1                                        |
| 8101260  | 4.53E-12 | 1.03     | <i>ANTXR2</i>   | anthrax toxin receptor 2                                        |
| 8098246  | 2.82E-11 | 1.94     | <i>ANXA10</i>   | annexin A10                                                     |
| 8072735  | 5.72E-15 | 1.43     | <i>APOL1</i>    | apolipoprotein L1                                               |
| 8095744  | 1.88E-05 | 1.08     | <i>AREG</i>     | amphiregulin                                                    |
| 7954527  | 3.90E-12 | 1.08     | <i>ARNTL2</i>   | aryl hydrocarbon receptor nuclear translocator like 2           |
| 8040113  | 2.89E-18 | 1.03     | <i>ASAP2</i>    | ArfGAP with SH3 domain, ankyrin repeat and PH domain 2          |
| 7923086  | 5.15E-10 | 1.03     | <i>ASPM</i>     | abnormal spindle microtubule assembly                           |
| 8162394  | 1.59E-08 | 1.16     | <i>ASPN</i>     | asporin                                                         |
| 8067125  | 3.73E-13 | 1.21     | <i>BCAS1</i>    | breast carcinoma amplified sequence 1                           |
| 8170648  | 7.58E-11 | 1.23     | <i>BGN</i>      | biglycan                                                        |
| 8053417  | 1.90E-14 | 1.22     | <i>CAPG</i>     | capping actin protein, gelsolin like                            |
| 8048864  | 1.01E-09 | 1.26     | <i>CCL20</i>    | C-C motif chemokine ligand 20                                   |
| 8120719  | 4.00E-12 | 1.25     | <i>CD109</i>    | CD109 molecule                                                  |
| 8086517  | 9.70E-13 | 1.01     | <i>CDCP1</i>    | CUB domain containing protein 1                                 |
| 8001800  | 1.72E-13 | 1.51     | <i>CDH11</i>    | cadherin 11                                                     |
| 7996819  | 2.25E-17 | 1.43     | <i>CDH3</i>     | cadherin 3                                                      |

|         |          |      |                |                                                           |
|---------|----------|------|----------------|-----------------------------------------------------------|
| 8037205 | 4.41E-12 | 1.1  | <i>CEACAM1</i> | carcinoembryonic antigen related cell adhesion molecule 1 |
| 8029086 | 1.62E-15 | 2.79 | <i>CEACAM5</i> | carcinoembryonic antigen related cell adhesion molecule 5 |
| 8029098 | 2.64E-15 | 2.42 | <i>CEACAM6</i> | carcinoembryonic antigen related cell adhesion molecule 6 |
| 7985317 | 6.13E-14 | 1.39 | <i>CEMIP</i>   | cell migration inducing hyaluronan binding protein        |
| 7909708 | 9.65E-12 | 1.12 | <i>CENPF</i>   | centromere protein F                                      |
| 8082928 | 1.57E-10 | 1.72 | <i>CLDN18</i>  | claudin 18                                                |
| 8129082 | 1.42E-16 | 1.42 | <i>COL10A1</i> | collagen type X alpha 1 chain                             |
| 7918064 | 1.46E-15 | 1.85 | <i>COL11A1</i> | collagen type XI alpha 1 chain                            |
| 8127563 | 2.53E-11 | 1.65 | <i>COL12A1</i> | collagen type XII alpha 1 chain                           |
| 7936144 | 7.85E-18 | 1.65 | <i>COL17A1</i> | collagen type XVII alpha 1 chain                          |
| 8016646 | 2.75E-09 | 1.53 | <i>COL1A1</i>  | collagen type I alpha 1 chain                             |
| 8046922 | 1.33E-08 | 1.42 | <i>COL3A1</i>  | collagen type III alpha 1 chain                           |
| 8057620 | 3.35E-10 | 1.36 | <i>COL5A2</i>  | collagen type V alpha 2 chain                             |
| 8059905 | 1.33E-08 | 1.27 | <i>COL6A3</i>  | collagen type VI alpha 3 chain                            |
| 8081235 | 3.69E-12 | 1.37 | <i>COL8A1</i>  | collagen type VIII alpha 1 chain                          |
| 8035517 | 4.25E-09 | 1.2  | <i>COMP</i>    | cartilage oligomeric matrix protein                       |
| 8091385 | 9.59E-08 | 1.67 | <i>CP</i>      | ceruloplasmin (ferroxidase)                               |
| 8065412 | 2.60E-11 | 1.65 | <i>CST1</i>    | cystatin SN                                               |
| 8065416 | 3.03E-12 | 1.04 | <i>CST2</i>    | cystatin SA                                               |
| 7909164 | 6.32E-18 | 2.55 | <i>CTSE</i>    | cathepsin E                                               |
| 7919815 | 3.20E-08 | 1.19 | <i>CTSK</i>    | cathepsin K                                               |
| 8100977 | 4.36E-10 | 1.23 | <i>CXCL5</i>   | C-X-C motif chemokine ligand 5                            |
| 7929466 | 4.28E-09 | 1.26 | <i>CYP2C18</i> | cytochrome P450 family 2 subfamily C member 18            |
| 8089082 | 1.72E-12 | 1.1  | <i>DCBLD2</i>  | discoidin, CUB and LCCL domain containing 2               |
| 8103563 | 8.80E-13 | 1.13 | <i>DDX60</i>   | DEXD/H-box helicase 60                                    |
| 7968800 | 3.46E-11 | 1.02 | <i>DGKH</i>    | diacylglycerol kinase eta                                 |
| 8046124 | 1.43E-09 | 1.25 | <i>DHRS9</i>   | dehydrogenase/reductase 9                                 |
| 8118061 | 3.67E-09 | 1.81 | <i>DPCR1</i>   | diffuse panbronchiolitis critical region 1                |
| 8114920 | 2.24E-09 | 1.1  | <i>DPYSL3</i>  | dihydropyrimidinase like 3                                |
| 8020762 | 1.97E-06 | 1.04 | <i>DSG3</i>    | desmoglein 3                                              |
| 7988350 | 2.29E-04 | 1.03 | <i>DUOX2</i>   | dual oxidase 2                                            |
| 8083941 | 1.02E-14 | 1.19 | <i>ECT2</i>    | epithelial cell transforming 2                            |
| 8112980 | 6.86E-13 | 1.61 | <i>EDIL3</i>   | EGF like repeats and discoidin domains 3                  |

|         |          |      |               |                                                     |
|---------|----------|------|---------------|-----------------------------------------------------|
| 8097692 | 2.43E-13 | 1.32 | <i>EDNRA</i>  | endothelin receptor type A                          |
| 7978544 | 2.28E-14 | 1.39 | <i>EGLN3</i>  | egl-9 family hypoxia inducible factor 3             |
| 8059279 | 8.50E-12 | 1.02 | <i>EPHA4</i>  | EPH receptor A4                                     |
| 7979179 | 1.62E-12 | 1.09 | <i>ERO1A</i>  | endoplasmic reticulum oxidoreductase 1 alpha        |
| 8138289 | 1.70E-11 | 1.02 | <i>ETV1</i>   | ETS variant 1                                       |
| 8056257 | 1.48E-10 | 1.61 | <i>FAP</i>    | fibroblast activation protein alpha                 |
| 7988467 | 2.02E-07 | 1.19 | <i>FBN1</i>   | fibrillin 1                                         |
| 8152703 | 1.26E-16 | 1.45 | <i>FBXO32</i> | F-box protein 32                                    |
| 8148220 | 9.66E-08 | 1.07 | <i>FER1L6</i> | fer-1 like family member 6                          |
| 8064904 | 2.27E-15 | 1.34 | <i>FERMT1</i> | fermitin family member 1                            |
| 7965541 | 1.38E-15 | 1.18 | <i>FGD6</i>   | FYVE, RhoGEF and PH domain containing 6             |
| 8058765 | 3.32E-15 | 2.19 | <i>FN1</i>    | fibronectin 1                                       |
| 8123104 | 1.08E-09 | 1.31 | <i>FNDC1</i>  | fibronectin type III domain containing 1            |
| 8027748 | 2.23E-14 | 1.32 | <i>FXVD3</i>  | FXVD domain containing ion transport regulator 3    |
| 8109926 | 9.35E-11 | 1.86 | <i>GABRP</i>  | gamma-aminobutyric acid type A receptor pi subunit  |
| 7984001 | 2.77E-09 | 1.34 | <i>GCNT3</i>  | glucosaminyl (N-acetyl) transferase 3, mucin type   |
| 7954065 | 8.40E-14 | 1.01 | <i>GPRC5A</i> | G protein-coupled receptor class C group 5 member A |
| 7979658 | 1.00E-08 | 1.07 | <i>GPX2</i>   | glutathione peroxidase 2                            |
| 8105348 | 8.85E-11 | 1.08 | <i>GPX8</i>   | glutathione peroxidase 8 (putative)                 |
| 7982377 | 7.03E-11 | 1.03 | <i>GREM1</i>  | gremlin 1, DAN family BMP antagonist                |
| 8167973 | 2.21E-12 | 1.07 | <i>HEPH</i>   | hephaestin                                          |
| 8042942 | 2.73E-13 | 1.16 | <i>HK2</i>    | hexokinase 2                                        |
| 8103769 | 6.90E-07 | 1.06 | <i>HPGD</i>   | hydroxyprostaglandin dehydrogenase 15-(NAD)         |
| 7976443 | 4.29E-14 | 1.23 | <i>IFI27</i>  | interferon alpha inducible protein 27               |
| 7902553 | 1.27E-09 | 1.09 | <i>IFI44</i>  | interferon induced protein 44                       |
| 7902541 | 7.29E-10 | 1.42 | <i>IFI44L</i> | interferon induced protein 44 like                  |
| 8058857 | 1.23E-10 | 1.49 | <i>IGFBP5</i> | insulin like growth factor binding protein 5        |
| 8029773 | 4.13E-12 | 1.08 | <i>IGFL2</i>  | IGF like family member 2                            |
| 8084794 | 1.20E-13 | 1.08 | <i>IL1RAP</i> | interleukin 1 receptor accessory protein            |
| 8102950 | 2.20E-14 | 1.18 | <i>INPP4B</i> | inositol polyphosphate-4-phosphatase type II B      |
| 7989985 | 1.01E-14 | 1.09 | <i>ITGA11</i> | integrin subunit alpha 11                           |
| 8105267 | 1.33E-16 | 2.14 | <i>ITGA2</i>  | integrin subunit alpha 2                            |
| 8008237 | 6.48E-14 | 1.43 | <i>ITGA3</i>  | integrin subunit alpha 3                            |

|         |          |      |               |                                                                            |
|---------|----------|------|---------------|----------------------------------------------------------------------------|
| 8009951 | 9.48E-18 | 1.23 | <i>ITGB4</i>  | integrin subunit beta 4                                                    |
| 8015387 | 1.04E-12 | 1.45 | <i>KRT17</i>  | keratin 17                                                                 |
| 8015349 | 1.87E-16 | 1.83 | <i>KRT19</i>  | keratin 19                                                                 |
| 7963421 | 2.82E-06 | 1.02 | <i>KRT6A</i>  | keratin 6A                                                                 |
| 7955613 | 3.49E-10 | 1.49 | <i>KRT7</i>   | keratin 7                                                                  |
| 8045539 | 1.89E-10 | 1.17 | <i>KYNU</i>   | kynureninase                                                               |
| 7924029 | 4.02E-20 | 2.08 | <i>LAMB3</i>  | laminin subunit beta 3                                                     |
| 7908072 | 4.10E-21 | 2.65 | <i>LAMC2</i>  | laminin subunit gamma 2                                                    |
| 8060940 | 2.46E-09 | 1.16 | <i>LAMP5</i>  | lysosomal associated membrane protein family member 5                      |
| 8158167 | 2.41E-07 | 1.12 | <i>LCN2</i>   | lipocalin 2                                                                |
| 8102232 | 3.80E-15 | 1.23 | <i>LEF1</i>   | lymphoid enhancer binding factor 1                                         |
| 8092541 | 1.61E-11 | 1.47 | <i>LIPH</i>   | lipase H                                                                   |
| 7969438 | 7.51E-14 | 1.17 | <i>LMO7</i>   | LIM domain 7                                                               |
| 8041383 | 3.42E-12 | 1.1  | <i>LTBP1</i>  | latent transforming growth factor beta binding protein 1                   |
| 7957023 | 1.19E-08 | 1.05 | <i>LYZ</i>    | lysozyme                                                                   |
| 8050537 | 2.86E-10 | 1.23 | <i>MATN3</i>  | matrilin 3                                                                 |
| 8050160 | 5.54E-19 | 1.55 | <i>MBOAT2</i> | membrane bound O-acyltransferase domain containing 2                       |
| 8135601 | 2.14E-13 | 1.35 | <i>MET</i>    | MET proto-oncogene, receptor tyrosine kinase                               |
| 7960919 | 1.26E-05 | 1.06 | <i>MFAP5</i>  | microfibrillar associated protein 5                                        |
| 7938485 | 5.47E-16 | 1.13 | <i>MICAL2</i> | microtubule associated monooxygenase, calponin and LIM domain containing 2 |
| 8049487 | 3.71E-18 | 1.24 | <i>MLPH</i>   | melanophilin                                                               |
| 7951271 | 9.75E-06 | 1.19 | <i>MMP1</i>   | matrix metalloproteinase 1                                                 |
| 8071758 | 7.16E-13 | 1.23 | <i>MMP11</i>  | matrix metalloproteinase 11                                                |
| 7951297 | 1.94E-10 | 1.41 | <i>MMP12</i>  | matrix metalloproteinase 12                                                |
| 7973336 | 2.18E-13 | 1.19 | <i>MMP14</i>  | matrix metalloproteinase 14                                                |
| 7951217 | 3.58E-05 | 1.2  | <i>MMP7</i>   | matrix metalloproteinase 7                                                 |
| 8090180 | 1.56E-08 | 1.51 | <i>MUC13</i>  | mucin 13, cell surface associated                                          |
| 8033674 | 8.10E-11 | 1.19 | <i>MUC16</i>  | mucin 16, cell surface associated                                          |
| 8135048 | 1.21E-07 | 1.3  | <i>MUC17</i>  | mucin 17, cell surface associated                                          |
| 7935058 | 1.29E-14 | 1.39 | <i>MYOF</i>   | myoferlin                                                                  |
| 7950933 | 6.10E-16 | 1.41 | <i>NOX4</i>   | NADPH oxidase 4                                                            |
| 8104758 | 2.01E-10 | 1.27 | <i>NPR3</i>   | natriuretic peptide receptor 3                                             |
| 8002303 | 2.18E-14 | 1.31 | <i>NQO1</i>   | NAD(P)H quinone dehydrogenase 1                                            |



|         |          |      |                 |                                                          |
|---------|----------|------|-----------------|----------------------------------------------------------|
| 8047763 | 2.10E-10 | 1.16 | <i>NRP2</i>     | neuropilin 2                                             |
| 8120967 | 1.76E-10 | 1.24 | <i>NT5E</i>     | 5'-nucleotidase ecto                                     |
| 7958913 | 1.00E-12 | 1.04 | <i>OAS2</i>     | 2'-5'-oligoadenylate synthetase 2                        |
| 7961142 | 3.79E-07 | 1.24 | <i>OLR1</i>     | oxidized low density lipoprotein receptor 1              |
| 8138613 | 1.99E-14 | 1.16 | <i>OSBPL3</i>   | oxysterol binding protein like 3                         |
| 7898413 | 1.04E-11 | 1.14 | <i>PADI1</i>    | peptidyl arginine deiminase 1                            |
| 8056151 | 2.61E-13 | 1.11 | <i>PLA2R1</i>   | phospholipase A2 receptor 1                              |
| 8101429 | 4.58E-13 | 1.76 | <i>PLAC8</i>    | placenta specific 8                                      |
| 8150509 | 2.92E-11 | 1.41 | <i>PLAT</i>     | plasminogen activator, tissue type                       |
| 7928429 | 1.67E-14 | 1.29 | <i>PLAU</i>     | plasminogen activator, urokinase                         |
| 7979710 | 1.41E-14 | 1.09 | <i>PLEK2</i>    | pleckstrin 2                                             |
| 7971077 | 3.76E-15 | 2.5  | <i>POSTN</i>    | periostin                                                |
| 7964907 | 2.54E-13 | 1.01 | <i>PTPRR</i>    | protein tyrosine phosphatase, receptor type R            |
| 8120043 | 4.31E-15 | 1.03 | <i>RUNX2</i>    | runt related transcription factor 2                      |
| 7920297 | 1.97E-10 | 1.08 | <i>S100A14</i>  | S100 calcium binding protein A14                         |
| 7969493 | 9.91E-15 | 1.55 | <i>SCEL</i>     | sciellin                                                 |
| 8150889 | 5.14E-15 | 1.2  | <i>SDR16C5</i>  | short chain dehydrogenase/reductase family 16C, member 5 |
| 8140534 | 2.57E-08 | 1.26 | <i>SEMA3C</i>   | semaphorin 3C                                            |
| 8023696 | 1.11E-05 | 1.1  | <i>SERPINB3</i> | serpin family B member 3                                 |
| 8021584 | 1.54E-16 | 1.97 | <i>SERPINB5</i> | serpin family B member 5                                 |
| 8123246 | 3.88E-11 | 1.13 | <i>SLC22A3</i>  | solute carrier family 22 member 3                        |
| 7915472 | 9.61E-19 | 1.67 | <i>SLC2A1</i>   | solute carrier family 2 member 1                         |
| 8125149 | 2.91E-09 | 1.08 | <i>SLC44A4</i>  | solute carrier family 44 member 4                        |
| 8169504 | 1.08E-16 | 2.66 | <i>SLC6A14</i>  | solute carrier family 6 member 14                        |
| 8078014 | 7.80E-14 | 1.2  | <i>SLC6A6</i>   | solute carrier family 6 member 6                         |
| 8066493 | 7.27E-14 | 1.73 | <i>SLPI</i>     | secretory leukocyte peptidase inhibitor                  |
| 8115327 | 5.79E-08 | 1.03 | <i>SPARC</i>    | secreted protein acidic and cysteine rich                |
| 8168749 | 1.87E-08 | 1.07 | <i>SRPX2</i>    | sushi repeat containing protein, X-linked 2              |
| 7961215 | 4.25E-17 | 1.03 | <i>STYK1</i>    | serine/threonine/tyrosine kinase 1                       |
| 8146863 | 3.54E-15 | 1.98 | <i>SULF1</i>    | sulfatase 1                                              |
| 8066822 | 2.14E-09 | 1.09 | <i>SULF2</i>    | sulfatase 2                                              |
| 7950810 | 1.82E-13 | 1.06 | <i>SYTL2</i>    | synaptotagmin like 2                                     |
| 7948444 | 2.51E-07 | 1.59 | <i>TCN1</i>     | transcobalamin 1                                         |

|         |          |       |                |                                                      |
|---------|----------|-------|----------------|------------------------------------------------------|
| 8070579 | 6.08E-09 | 1.51  | <i>TFF1</i>    | trefoil factor 1                                     |
| 8108217 | 6.23E-09 | 1.02  | <i>TGFB1</i>   | transforming growth factor beta induced              |
| 8066214 | 1.38E-11 | 1.26  | <i>TGM2</i>    | transglutaminase 2                                   |
| 8130867 | 3.13E-12 | 1.53  | <i>THBS2</i>   | thrombospondin 2                                     |
| 7993638 | 3.51E-10 | 1.55  | <i>TMC5</i>    | transmembrane channel like 5                         |
| 7993588 | 1.31E-17 | 1.14  | <i>TMC7</i>    | transmembrane channel like 7                         |
| 7945169 | 2.66E-09 | 1.12  | <i>TMEM45B</i> | transmembrane protein 45B                            |
| 7944164 | 1.38E-18 | 2.06  | <i>TMPRSS4</i> | transmembrane protease, serine 4                     |
| 8045688 | 1.22E-06 | 1.15  | <i>TNFAIP6</i> | TNF alpha induced protein 6                          |
| 8015016 | 4.18E-14 | 1.31  | <i>TNS4</i>    | tensin 4                                             |
| 8014974 | 4.39E-11 | 1.16  | <i>TOP2A</i>   | topoisomerase (DNA) II alpha                         |
| 7952290 | 6.26E-16 | 1.28  | <i>TRIM29</i>  | tripartite motif containing 29                       |
| 8179617 | 7.88E-11 | 1.35  | <i>TRIM31</i>  | tripartite motif containing 31                       |
| 7901175 | 1.30E-19 | 2.38  | <i>TSPAN1</i>  | tetraspanin 1                                        |
| 7964927 | 1.28E-07 | 1.39  | <i>TSPAN8</i>  | tetraspanin 8                                        |
| 8106743 | 9.57E-12 | 1.76  | <i>VCAN</i>    | versican                                             |
| 8169263 | 1.16E-09 | 1.6   | <i>VSIG1</i>   | V-set and immunoglobulin domain containing 1         |
| 8058591 | 2.01E-10 | -1.45 | <i>ACADL</i>   | acyl-CoA dehydrogenase, long chain                   |
| 8101881 | 8.64E-06 | -1.11 | <i>ADH1B</i>   | alcohol dehydrogenase 1B (class I), beta polypeptide |
| 8095628 | 6.14E-10 | -2.51 | <i>ALB</i>     | albumin                                              |
| 8074201 | 3.98E-08 | -1.2  | <i>ANKRD62</i> | ankyrin repeat domain 62                             |
| 7991335 | 1.40E-09 | -1.78 | <i>ANPEP</i>   | alanyl aminopeptidase, membrane                      |
| 8047300 | 4.56E-13 | -1.77 | <i>AOX1</i>    | aldehyde oxidase 1                                   |
| 7994252 | 4.52E-08 | -1.46 | <i>AQP8</i>    | aquaporin 8                                          |
| 7951910 | 7.03E-09 | -1.14 | <i>BACE1</i>   | beta-secretase 1                                     |
| 8174201 | 7.50E-10 | -1.07 | <i>BEX1</i>    | brain expressed X-linked 1                           |
| 7937079 | 9.88E-08 | -1.13 | <i>BNIP3</i>   | BCL2 interacting protein 3                           |
| 7908917 | 1.93E-12 | -1.12 | <i>BTG2</i>    | BTG anti-proliferation factor 2                      |
| 7989473 | 7.82E-09 | -1.12 | <i>C2CD4B</i>  | C2 calcium dependent domain containing 4B            |
| 8163839 | 6.42E-10 | -1.13 | <i>C5</i>      | complement component 5                               |
| 8111864 | 2.87E-07 | -1.18 | <i>C6</i>      | complement component 6                               |
| 8158976 | 2.54E-06 | -2.46 | <i>CEL</i>     | carboxyl ester lipase                                |
| 7898176 | 2.00E-06 | -2.14 | <i>CELA2A</i>  | chymotrypsin like elastase family member 2A          |

|         |          |       |               |                                                     |
|---------|----------|-------|---------------|-----------------------------------------------------|
| 7898184 | 1.26E-06 | -2.09 | <i>CELA2B</i> | chymotrypsin like elastase family member 2B         |
| 7898725 | 4.89E-06 | -2.12 | <i>CELA3A</i> | chymotrypsin like elastase family member 3A         |
| 7898713 | 2.05E-06 | -1.96 | <i>CELA3B</i> | chymotrypsin like elastase family member 3B         |
| 8158987 | 6.37E-08 | -1.45 | <i>CELP</i>   | carboxyl ester lipase pseudogene                    |
| 8135661 | 1.55E-03 | -1.28 | <i>CFTR</i>   | cystic fibrosis transmembrane conductance regulator |
| 7910915 | 2.14E-07 | -1.02 | <i>CHRM3</i>  | cholinergic receptor muscarinic 3                   |
| 8125936 | 2.10E-06 | -2.35 | <i>CLPS</i>   | colipase                                            |
| 8136235 | 3.14E-05 | -1.9  | <i>CPA1</i>   | carboxypeptidase A1                                 |
| 8136187 | 4.02E-06 | -2.5  | <i>CPA2</i>   | carboxypeptidase A2                                 |
| 8083246 | 9.24E-05 | -1.71 | <i>CPB1</i>   | carboxypeptidase B1                                 |
| 8110990 | 8.07E-10 | -1.19 | <i>CTNND2</i> | catenin delta 2                                     |
| 7898167 | 5.05E-07 | -2.57 | <i>CTRC</i>   | chymotrypsin C                                      |
| 8002121 | 7.07E-08 | -2.06 | <i>CTRL</i>   | chymotrypsin like                                   |
| 8124196 | 8.77E-07 | -1.18 | <i>DCDC2</i>  | doublecortin domain containing 2                    |
| 8044700 | 8.95E-09 | -1.1  | <i>DPP10</i>  | dipeptidyl peptidase like 10                        |
| 8096845 | 1.76E-07 | -1.82 | <i>EGF</i>    | epidermal growth factor                             |
| 8145532 | 3.54E-12 | -1.05 | <i>EPHX2</i>  | epoxide hydrolase 2                                 |
| 7925342 | 1.18E-11 | -1.62 | <i>ERO1B</i>  | endoplasmic reticulum oxidoreductase 1 beta         |
| 7961524 | 8.66E-08 | -2.42 | <i>ERP27</i>  | endoplasmic reticulum protein 27                    |
| 8098671 | 7.89E-09 | -1.67 | <i>F11</i>    | coagulation factor XI                               |
| 8176193 | 3.08E-08 | -1.07 | <i>F8</i>     | coagulation factor VIII                             |
| 8151532 | 1.57E-04 | -1.25 | <i>FABP4</i>  | fatty acid binding protein 4                        |
| 8068684 | 1.96E-05 | -1.03 | <i>FAM3B</i>  | family with sequence similarity 3 member B          |
| 8149521 | 7.69E-08 | -1.67 | <i>FGL1</i>   | fibrinogen like 1                                   |
| 8046116 | 6.36E-07 | -1.09 | <i>G6PC2</i>  | glucose-6-phosphatase catalytic subunit 2           |
| 7988414 | 1.78E-05 | -1.54 | <i>GATM</i>   | glycine amidinotransferase                          |
| 8119620 | 7.59E-07 | -1.28 | <i>GNMT</i>   | glycine N-methyltransferase                         |
| 7999920 | 1.06E-06 | -2.6  | <i>GP2</i>    | glycoprotein 2                                      |
| 7949320 | 1.96E-07 | -1.05 | <i>GPHA2</i>  | glycoprotein hormone alpha 2                        |
| 8056327 | 1.15E-08 | -1.04 | <i>GRB14</i>  | growth factor receptor bound protein 14             |
| 8166202 | 2.77E-07 | -1.2  | <i>GRPR</i>   | gastrin releasing peptide receptor                  |
| 8127065 | 5.66E-09 | -1.38 | <i>GSTA2</i>  | glutathione S-transferase alpha 2                   |
| 8089402 | 1.70E-08 | -1.17 | <i>GUCA1C</i> | guanylate cyclase activator 1C                      |

|         |          |                       |                                                                             |
|---------|----------|-----------------------|-----------------------------------------------------------------------------|
| 7991034 | 3.55E-08 | -1.15 <i>HOMER2</i>   | homer scaffolding protein 2                                                 |
| 7954377 | 2.90E-10 | -2.31 <i>IAPP</i>     | islet amyloid polypeptide                                                   |
| 7913768 | 4.46E-06 | -1.04 <i>IL22RA1</i>  | interleukin 22 receptor subunit alpha 1                                     |
| 8009493 | 2.49E-06 | -1.35 <i>KCNJ16</i>   | potassium voltage-gated channel subfamily J member 16                       |
| 7903592 | 7.50E-09 | -1.78 <i>KIAA1324</i> | KIAA1324                                                                    |
| 8038633 | 1.13E-07 | -1.79 <i>KLK1</i>     | kallikrein 1                                                                |
| 7961580 | 1.30E-11 | -1.12 <i>LMO3</i>     | LIM domain only 3                                                           |
| 8052372 | 5.28E-08 | -1.3 <i>MIR217</i>    | microRNA 217                                                                |
| 8001531 | 3.95E-08 | -1.22 <i>MT1G</i>     | metallothionein 1G                                                          |
| 7908597 | 3.29E-09 | -1.85 <i>NR5A2</i>    | nuclear receptor subfamily 5 group A member 2                               |
| 8142270 | 1.12E-09 | -1.33 <i>NRCAM</i>    | neuronal cell adhesion molecule                                             |
| 7990555 | 1.31E-07 | -1.53 <i>NRG4</i>     | neuregulin 4                                                                |
| 7938687 | 2.11E-08 | -1.02 <i>NUCB2</i>    | nucleobindin 2                                                              |
| 7988987 | 1.00E-05 | -1.02 <i>ONECUT1</i>  | one cut homeobox 1                                                          |
| 7944793 | 1.56E-08 | -1.31 <i>OR8D4</i>    | olfactory receptor family 8 subfamily D member 4                            |
| 8169389 | 2.99E-08 | -1.19 <i>PAK3</i>     | p21 (RAC1) activated kinase 3                                               |
| 7991815 | 2.27E-08 | -1.94 <i>PDIA2</i>    | protein disulfide isomerase family A member 2                               |
| 8141094 | 5.08E-11 | -1.52 <i>PDK4</i>     | pyruvate dehydrogenase kinase 4                                             |
| 8126954 | 4.13E-04 | -1.03 <i>PKHD1</i>    | polycystic kidney and hepatic disease 1 (autosomal recessive)               |
| 7967034 | 2.19E-06 | -2.22 <i>PLA2G1B</i>  | phospholipase A2 group IB                                                   |
| 7923837 | 5.02E-08 | -1.35 <i>PM20D1</i>   | peptidase M20 domain containing 1                                           |
| 7930790 | 1.51E-07 | -2.84 <i>PNLIPRP1</i> | pancreatic lipase related protein 1                                         |
| 7930804 | 1.10E-06 | -2.6 <i>PNLIPRP2</i>  | pancreatic lipase related protein 2 (gene/pseudogene)                       |
| 8136795 | 8.74E-05 | -1.64 <i>PRSS1</i>    | protease, serine 1                                                          |
| 8154848 | 4.34E-06 | -1.25 <i>PRSS3</i>    | protease, serine 3                                                          |
| 8136801 | 3.24E-05 | -1.5 <i>PRSS3P2</i>   | protease, serine 3 pseudogene 2                                             |
| 8062948 | 2.77E-08 | -1.52 <i>RBPJL</i>    | recombination signal binding protein for immunoglobulin kappa J region like |
| 8042986 | 1.89E-04 | -1.58 <i>REG1A</i>    | regenerating family member 1 alpha                                          |
| 8053330 | 1.41E-04 | -1.96 <i>REG1B</i>    | regenerating family member 1 beta                                           |
| 8053337 | 6.00E-05 | -1.98 <i>REG1CP</i>   | regenerating family member 1 gamma, pseudogene                              |
| 8053341 | 7.73E-04 | -1.49 <i>REG3A</i>    | regenerating family member 3 alpha                                          |
| 8042978 | 1.49E-04 | -1.27 <i>REG3G</i>    | regenerating family member 3 gamma                                          |
| 8167027 | 3.63E-09 | -1.03 <i>RGN</i>      | regucalcin                                                                  |

|         |          |       |                 |                                                |
|---------|----------|-------|-----------------|------------------------------------------------|
| 8117288 | 2.25E-06 | -1.28 | <i>SCGN</i>     | secretagoin, EF-hand calcium binding protein   |
| 8091910 | 3.15E-08 | -2.3  | <i>SERPINI2</i> | serpin family I member 2                       |
| 7934936 | 3.80E-10 | -1.52 | <i>SLC16A12</i> | solute carrier family 16 member 12             |
| 8117304 | 2.03E-06 | -1.15 | <i>SLC17A4</i>  | solute carrier family 17 member 4              |
| 7956229 | 2.67E-08 | -1.29 | <i>SLC39A5</i>  | solute carrier family 39 member 5              |
| 7948249 | 2.57E-09 | -1.12 | <i>SLC43A1</i>  | solute carrier family 43 member 1              |
| 8095585 | 4.87E-05 | -1.39 | <i>SLC4A4</i>   | solute carrier family 4 member 4               |
| 8144786 | 1.34E-13 | -1.39 | <i>SLC7A2</i>   | solute carrier family 7 member 2               |
| 8114964 | 1.33E-03 | -1.3  | <i>SPINK1</i>   | serine peptidase inhibitor, Kazal type 1       |
| 8092682 | 1.94E-06 | -1.03 | <i>SST</i>      | somatostatin                                   |
| 8036699 | 9.75E-07 | -1.25 | <i>SYCN</i>     | syncollin                                      |
| 8141016 | 2.75E-07 | -1.11 | <i>TFPI2</i>    | tissue factor pathway inhibitor 2              |
| 8002283 | 4.20E-10 | -1.73 | <i>TMED6</i>    | transmembrane p24 trafficking protein 6        |
| 7957221 | 1.77E-08 | -1.61 | <i>TRHDE</i>    | thyrotropin releasing hormone degrading enzyme |
| 8057056 | 1.89E-12 | -1.2  | <i>TTN</i>      | titin                                          |
| 8020795 | 1.18E-02 | -1.04 | <i>TTR</i>      | transthyretin                                  |

#### GSE28735

| ID      | P.Value  | logFC     | Gene.symbol      | Gene.title                                                      |
|---------|----------|-----------|------------------|-----------------------------------------------------------------|
| 7985310 | 1.83E-15 | 1.128362  | <i>ABHD17C</i>   | abhydrolase domain containing 17C                               |
| 7930498 | 1.19E-09 | 1.4634847 | <i>ACSL5</i>     | acyl-CoA synthetase long-chain family member 5                  |
| 7934906 | 8.51E-07 | 1.1454927 | <i>ACTA2</i>     | actin, alpha 2, smooth muscle, aorta                            |
| 7936968 | 8.37E-05 | 1.0717007 | <i>ADAM12</i>    | ADAM metallopeptidase domain 12                                 |
| 8145293 | 1.87E-07 | 1.141082  | <i>ADAM28</i>    | ADAM metallopeptidase domain 28                                 |
| 8146000 | 2.77E-09 | 1.1530387 | <i>ADAM9</i>     | ADAM metallopeptidase domain 9                                  |
| 8111387 | 2.08E-11 | 1.4163264 | <i>ADAMTS12</i>  | ADAM metallopeptidase with thrombospondin type 1 motif 12       |
| 8112342 | 2.85E-10 | 1.038462  | <i>ADAMTS6</i>   | ADAM metallopeptidase with thrombospondin type 1 motif 6        |
| 8126820 | 9.84E-11 | 1.6035156 | <i>ADGRF1</i>    | adhesion G protein-coupled receptor F1                          |
| 8132557 | 5.02E-08 | 1.1198558 | <i>AEBP1</i>     | AE binding protein 1                                            |
| 8094028 | 1.10E-09 | 1.2469322 | <i>AFAP1-AS1</i> | AFAP1 antisense RNA 1                                           |
| 8138381 | 5.69E-13 | 2.1373789 | <i>AGR2</i>      | anterior gradient 2, protein disulphide isomerase family member |
| 7981514 | 1.40E-16 | 1.7455516 | <i>AHNAK2</i>    | AHNAK nucleoprotein 2                                           |
| 7962183 | 8.82E-10 | 1.062622  | <i>AK4</i>       | adenylate kinase 4                                              |

|         |          |           |                 |                                                           |
|---------|----------|-----------|-----------------|-----------------------------------------------------------|
| 8149071 | 3.01E-07 | 1.0255767 | <i>ANGPT2</i>   | angiopoietin 2                                            |
| 7934898 | 1.10E-10 | 1.5765009 | <i>ANKRD22</i>  | ankyrin repeat domain 22                                  |
| 8132318 | 4.63E-11 | 1.6620173 | <i>ANLN</i>     | anillin actin binding protein                             |
| 7942135 | 1.27E-11 | 1.2739089 | <i>ANO1</i>     | anoctamin 1                                               |
| 8042439 | 5.32E-11 | 1.5904338 | <i>ANTXR1</i>   | anthrax toxin receptor 1                                  |
| 8098246 | 5.23E-11 | 2.3579367 | <i>ANXA10</i>   | annexin A10                                               |
| 8095986 | 1.60E-07 | 1.0462073 | <i>ANXA3</i>    | annexin A3                                                |
| 8072735 | 2.49E-12 | 1.5050227 | <i>APOL1</i>    | apolipoprotein L1                                         |
| 8095744 | 5.40E-04 | 1.0105213 | <i>AREG</i>     | amphiregulin                                              |
| 7954527 | 9.10E-11 | 1.2634424 | <i>ARNTL2</i>   | aryl hydrocarbon receptor nuclear translocator like 2     |
| 8040113 | 1.48E-14 | 1.0555331 | <i>ASAP2</i>    | ArfGAP with SH3 domain, ankyrin repeat and PH domain 2    |
| 7923086 | 5.33E-09 | 1.2180584 | <i>ASPM</i>     | abnormal spindle microtubule assembly                     |
| 7997593 | 3.79E-09 | 1.0605813 | <i>ATP2C2</i>   | ATPase secretory pathway Ca <sup>2+</sup> transporting 2  |
| 8141206 | 9.69E-10 | 1.2480627 | <i>BAIAP2L1</i> | BAI1 associated protein 2 like 1                          |
| 8067125 | 5.07E-13 | 1.5367902 | <i>BCAS1</i>    | breast carcinoma amplified sequence 1                     |
| 8170648 | 1.88E-07 | 1.2178456 | <i>BGN</i>      | biglycan                                                  |
| 8053417 | 3.20E-12 | 1.409224  | <i>CAPG</i>     | capping actin protein, gelsolin like                      |
| 8006594 | 1.67E-04 | 1.1312298 | <i>CCL18</i>    | C-C motif chemokine ligand 18                             |
| 8048864 | 3.22E-10 | 1.3648089 | <i>CCL20</i>    | C-C motif chemokine ligand 20                             |
| 8120719 | 3.63E-09 | 1.2498704 | <i>CD109</i>    | CD109 molecule                                            |
| 8086517 | 4.12E-12 | 1.1710249 | <i>CDCP1</i>    | CUB domain containing protein 1                           |
| 8001800 | 4.02E-09 | 1.4890444 | <i>CDH11</i>    | cadherin 11                                               |
| 7996819 | 8.76E-16 | 1.6362931 | <i>CDH3</i>     | cadherin 3                                                |
| 8037205 | 1.81E-11 | 1.292694  | <i>CEACAM1</i>  | carcinoembryonic antigen related cell adhesion molecule 1 |
| 8029086 | 2.16E-13 | 3.1812869 | <i>CEACAM5</i>  | carcinoembryonic antigen related cell adhesion molecule 5 |
| 8029098 | 1.06E-12 | 2.6271224 | <i>CEACAM6</i>  | carcinoembryonic antigen related cell adhesion molecule 6 |
| 7985317 | 1.68E-13 | 1.8033796 | <i>CEMIP</i>    | cell migration inducing hyaluronan binding protein        |
| 7909708 | 1.11E-10 | 1.3075462 | <i>CENPF</i>    | centromere protein F                                      |
| 8082928 | 2.26E-10 | 2.1265416 | <i>CLDN18</i>   | claudin 18                                                |
| 8129082 | 3.23E-14 | 1.5692449 | <i>COL10A1</i>  | collagen type X alpha 1 chain                             |
| 7918064 | 3.05E-13 | 2.1946749 | <i>COL11A1</i>  | collagen type XI alpha 1 chain                            |
| 8127563 | 7.18E-09 | 1.732026  | <i>COL12A1</i>  | collagen type XII alpha 1 chain                           |
| 7936144 | 2.22E-16 | 1.8936258 | <i>COL17A1</i>  | collagen type XVII alpha 1 chain                          |

|         |          |           |                |                                                |
|---------|----------|-----------|----------------|------------------------------------------------|
| 8016646 | 8.94E-07 | 1.5020929 | <i>COL1A1</i>  | collagen type I alpha 1 chain                  |
| 8046922 | 5.70E-06 | 1.3701904 | <i>COL3A1</i>  | collagen type III alpha 1 chain                |
| 8057620 | 3.70E-07 | 1.3867727 | <i>COL5A2</i>  | collagen type V alpha 2 chain                  |
| 8059905 | 6.07E-06 | 1.2233471 | <i>COL6A3</i>  | collagen type VI alpha 3 chain                 |
| 8081235 | 4.54E-09 | 1.4414827 | <i>COL8A1</i>  | collagen type VIII alpha 1 chain               |
| 8035517 | 5.99E-08 | 1.4673376 | <i>COMP</i>    | cartilage oligomeric matrix protein            |
| 8100154 | 1.61E-08 | 1.0800867 | <i>CORIN</i>   | corin, serine peptidase                        |
| 8091385 | 1.94E-06 | 1.767232  | <i>CP</i>      | ceruloplasmin (ferroxidase)                    |
| 8065412 | 2.10E-10 | 2.0248356 | <i>CST1</i>    | cystatin SN                                    |
| 8065416 | 7.25E-11 | 1.2321847 | <i>CST2</i>    | cystatin SA                                    |
| 8147777 | 5.55E-11 | 1.0049256 | <i>CTHRC1</i>  | collagen triple helix repeat containing 1      |
| 7909164 | 6.00E-15 | 2.6841011 | <i>CTSE</i>    | cathepsin E                                    |
| 7919815 | 2.32E-05 | 1.0460687 | <i>CTSK</i>    | cathepsin K                                    |
| 8100977 | 2.77E-09 | 1.5615738 | <i>CXCL5</i>   | C-X-C motif chemokine ligand 5                 |
| 7929466 | 8.67E-08 | 1.4042131 | <i>CYP2C18</i> | cytochrome P450 family 2 subfamily C member 18 |
| 8089082 | 6.57E-09 | 1.0321687 | <i>DCBLD2</i>  | discoidin, CUB and LCCL domain containing 2    |
| 8103563 | 1.29E-08 | 1.0535862 | <i>DDX60</i>   | DEXD/H-box helicase 60                         |
| 7968800 | 1.59E-08 | 1.0501716 | <i>DGKH</i>    | diacylglycerol kinase eta                      |
| 8046124 | 8.43E-08 | 1.2735449 | <i>DHRS9</i>   | dehydrogenase/reductase 9                      |
| 7927631 | 3.61E-09 | 1.2162724 | <i>DKK1</i>    | dickkopf WNT signaling pathway inhibitor 1     |
| 7979307 | 1.49E-08 | 1.1127349 | <i>DLGAP5</i>  | DLG associated protein 5                       |
| 8118061 | 6.51E-10 | 2.1386271 | <i>DPCR1</i>   | diffuse panbronchiolitis critical region 1     |
| 8114920 | 1.11E-06 | 1.1362667 | <i>DPYSL3</i>  | dihydropyrimidinase like 3                     |
| 8020779 | 2.73E-06 | 1.0892258 | <i>DSG2</i>    | desmoglein 2                                   |
| 8020762 | 1.17E-04 | 1.0104942 | <i>DSG3</i>    | desmoglein 3                                   |
| 8083941 | 1.39E-12 | 1.3293738 | <i>ECT2</i>    | epithelial cell transforming 2                 |
| 8112980 | 2.04E-08 | 1.5138422 | <i>EDIL3</i>   | EGF like repeats and discoidin domains 3       |
| 8097692 | 4.42E-09 | 1.3127658 | <i>EDNRA</i>   | endothelin receptor type A                     |
| 8113433 | 2.78E-12 | 1.1553482 | <i>EFNA5</i>   | ephrin A5                                      |
| 7972713 | 1.22E-11 | 1.0293451 | <i>EFNB2</i>   | ephrin B2                                      |
| 7978544 | 5.13E-13 | 1.6243329 | <i>EGLN3</i>   | egl-9 family hypoxia inducible factor 3        |
| 7953532 | 1.80E-09 | 1.1134007 | <i>ENO2</i>    | enolase 2                                      |
| 8059279 | 3.01E-09 | 1.1711916 | <i>EPHA4</i>   | EPH receptor A4                                |

|         |          |           |                 |                                                     |
|---------|----------|-----------|-----------------|-----------------------------------------------------|
| 7965390 | 1.27E-04 | 1.0430022 | <i>EPYC</i>     | epiphycan                                           |
| 7979179 | 4.80E-12 | 1.219264  | <i>ERO1A</i>    | endoplasmic reticulum oxidoreductase 1 alpha        |
| 8112045 | 6.30E-13 | 1.0108476 | <i>ESM1</i>     | endothelial cell specific molecule 1                |
| 8138289 | 7.65E-08 | 1.0579796 | <i>ETV1</i>     | ETS variant 1                                       |
| 8056257 | 6.13E-07 | 1.4972633 | <i>FAP</i>      | fibroblast activation protein alpha                 |
| 7988467 | 1.49E-04 | 1.0233667 | <i>FBN1</i>     | fibrillin 1                                         |
| 8152703 | 2.43E-14 | 1.4711818 | <i>FBXO32</i>   | F-box protein 32                                    |
| 8065948 | 2.05E-13 | 1.089496  | <i>FER1L4</i>   | fer-1 like family member 4, pseudogene              |
| 8148220 | 4.80E-08 | 1.3372369 | <i>FER1L6</i>   | fer-1 like family member 6                          |
| 8064904 | 2.45E-12 | 1.5010753 | <i>FERMT1</i>   | fermitin family member 1                            |
| 7965541 | 2.57E-12 | 1.2339911 | <i>FGD6</i>     | FYVE, RhoGEF and PH domain containing 6             |
| 8058765 | 3.25E-12 | 2.2111    | <i>FN1</i>      | fibronectin 1                                       |
| 8123104 | 4.97E-08 | 1.4763207 | <i>FNDC1</i>    | fibronectin type III domain containing 1            |
| 8116579 | 3.69E-11 | 1.1159918 | <i>FOXQ1</i>    | forkhead box Q1                                     |
| 8033054 | 3.99E-08 | 1.0387011 | <i>FUT3</i>     | fucosyltransferase 3 (Lewis blood group)            |
| 8027748 | 1.66E-13 | 1.5452418 | <i>FXYPD3</i>   | FXYPD domain containing ion transport regulator 3   |
| 8109926 | 9.38E-08 | 2.0308344 | <i>GABRP</i>    | gamma-aminobutyric acid type A receptor pi subunit  |
| 7984001 | 1.02E-07 | 1.4315447 | <i>GCNT3</i>    | glucosaminyl (N-acetyl) transferase 3, mucin type   |
| 7970441 | 1.15E-15 | 1.0717644 | <i>GJB2</i>     | gap junction protein beta 2                         |
| 7954065 | 2.89E-12 | 1.1751238 | <i>GPRC5A</i>   | G protein-coupled receptor class C group 5 member A |
| 7979658 | 6.73E-07 | 1.1878256 | <i>GPX2</i>     | glutathione peroxidase 2                            |
| 8105348 | 2.15E-07 | 1.0094489 | <i>GPX8</i>     | glutathione peroxidase 8 (putative)                 |
| 7982377 | 4.57E-09 | 1.0603713 | <i>GREM1</i>    | gremlin 1, DAN family BMP antagonist                |
| 8167973 | 4.92E-09 | 1.2034709 | <i>HEPH</i>     | hephaestin                                          |
| 8117589 | 7.94E-11 | 1.1253782 | <i>HIST1H3H</i> | histone cluster 1, H3h                              |
| 8124531 | 1.04E-09 | 1.0039847 | <i>HIST1H3I</i> | histone cluster 1, H3i                              |
| 8042942 | 5.71E-11 | 1.3526864 | <i>HK2</i>      | hexokinase 2                                        |
| 8016457 | 3.11E-14 | 1.0872489 | <i>HOXB5</i>    | homeobox B5                                         |
| 8103769 | 1.76E-05 | 1.1121756 | <i>HPGD</i>     | hydroxyprostaglandin dehydrogenase 15-(NAD)         |
| 7976443 | 1.65E-11 | 1.3512633 | <i>IFI27</i>    | interferon alpha inducible protein 27               |
| 7902541 | 1.27E-05 | 1.2289118 | <i>IFI44L</i>   | interferon induced protein 44 like                  |
| 8138566 | 2.82E-09 | 1.1658791 | <i>IGF2BP3</i>  | insulin like growth factor 2 mRNA binding protein 3 |
| 8058857 | 1.19E-06 | 1.3557069 | <i>IGFBP5</i>   | insulin like growth factor binding protein 5        |



|         |          |           |               |                                                          |
|---------|----------|-----------|---------------|----------------------------------------------------------|
| 8029773 | 7.32E-12 | 1.4258422 | <i>IGFL2</i>  | IGF like family member 2                                 |
| 8043981 | 2.67E-08 | 1.0359142 | <i>IL1R2</i>  | interleukin 1 receptor type 2                            |
| 8084794 | 8.95E-11 | 1.0983738 | <i>IL1RAP</i> | interleukin 1 receptor accessory protein                 |
| 8173444 | 4.46E-08 | 1.0835424 | <i>IL2RG</i>  | interleukin 2 receptor subunit gamma                     |
| 8102950 | 3.31E-11 | 1.12227   | <i>INPP4B</i> | inositol polyphosphate-4-phosphatase type II B           |
| 7989985 | 2.48E-13 | 1.3723916 | <i>ITGA11</i> | integrin subunit alpha 11                                |
| 8105267 | 5.63E-14 | 2.2658244 | <i>ITGA2</i>  | integrin subunit alpha 2                                 |
| 8008237 | 2.38E-12 | 1.5188551 | <i>ITGA3</i>  | integrin subunit alpha 3                                 |
| 8009951 | 2.71E-14 | 1.303354  | <i>ITGB4</i>  | integrin subunit beta 4                                  |
| 8037408 | 1.65E-18 | 1.0487336 | <i>KCNN4</i>  | potassium calcium-activated channel subfamily N member 4 |
| 7984540 | 6.91E-09 | 1.0248458 | <i>KIF23</i>  | kinesin family member 23                                 |
| 8005449 | 1.19E-10 | 1.1537338 | <i>KRT17</i>  | keratin 17                                               |
| 8015349 | 1.25E-14 | 2.0580204 | <i>KRT19</i>  | keratin 19                                               |
| 7963421 | 3.52E-05 | 1.0361116 | <i>KRT6A</i>  | keratin 6A                                               |
| 7955613 | 1.27E-08 | 1.6835824 | <i>KRT7</i>   | keratin 7                                                |
| 8045539 | 4.37E-08 | 1.2622391 | <i>KYNU</i>   | kynureninase                                             |
| 8020551 | 7.66E-15 | 1.3547947 | <i>LAMA3</i>  | laminin subunit alpha 3                                  |
| 7924029 | 1.19E-18 | 2.3442298 | <i>LAMB3</i>  | laminin subunit beta 3                                   |
| 7908072 | 7.03E-19 | 2.9016536 | <i>LAMC2</i>  | laminin subunit gamma 2                                  |
| 8060940 | 6.15E-07 | 1.2891922 | <i>LAMP5</i>  | lysosomal associated membrane protein family member 5    |
| 8158167 | 4.06E-06 | 1.1424984 | <i>LCN2</i>   | lipocalin 2                                              |
| 8102232 | 4.12E-11 | 1.3104127 | <i>LEF1</i>   | lymphoid enhancer binding factor 1                       |
| 8092541 | 1.05E-10 | 1.6364271 | <i>LIPH</i>   | lipase H                                                 |
| 7969438 | 7.10E-12 | 1.177314  | <i>LMO7</i>   | LIM domain 7                                             |
| 8149774 | 1.02E-10 | 1.2380353 | <i>LOXL2</i>  | lysyl oxidase like 2                                     |
| 8077366 | 1.05E-07 | 1.1022207 | <i>LRRN1</i>  | leucine rich repeat neuronal 1                           |
| 8041383 | 1.39E-08 | 1.0574087 | <i>LTBP1</i>  | latent transforming growth factor beta binding protein 1 |
| 8138466 | 2.44E-05 | 1.0055842 | <i>MACC1</i>  | metastasis associated in colon cancer 1                  |
| 8054479 | 6.50E-10 | 1.0471758 | <i>MALL</i>   | mal, T-cell differentiation protein like                 |
| 8050537 | 1.98E-08 | 1.3906947 | <i>MATN3</i>  | matrilin 3                                               |
| 8050160 | 1.95E-14 | 1.5977576 | <i>MBOAT2</i> | membrane bound O-acyltransferase domain containing 2     |
| 8155214 | 2.08E-09 | 1.1532836 | <i>MELK</i>   | maternal embryonic leucine zipper kinase                 |
| 8135601 | 5.01E-12 | 1.4803842 | <i>MET</i>    | MET proto-oncogene, receptor tyrosine kinase             |

|         |          |           |               |                                                                            |
|---------|----------|-----------|---------------|----------------------------------------------------------------------------|
| 7960919 | 1.47E-04 | 1.0858004 | <i>MFAP5</i>  | microfibrillar associated protein 5                                        |
| 7938485 | 1.33E-13 | 1.2684082 | <i>MICAL2</i> | microtubule associated monooxygenase, calponin and LIM domain containing 2 |
| 7937020 | 3.11E-09 | 1.1643182 | <i>MKI67</i>  | marker of proliferation Ki-67                                              |
| 8049487 | 2.82E-18 | 1.4629327 | <i>MLPH</i>   | melanophilin                                                               |
| 7951271 | 1.96E-04 | 1.2251593 | <i>MMP1</i>   | matrix metalloproteinase 1                                                 |
| 8071758 | 1.08E-11 | 1.5014524 | <i>MMP11</i>  | matrix metalloproteinase 11                                                |
| 7951297 | 4.19E-09 | 1.7443562 | <i>MMP12</i>  | matrix metalloproteinase 12                                                |
| 7973336 | 7.61E-11 | 1.325874  | <i>MMP14</i>  | matrix metalloproteinase 14                                                |
| 7951217 | 2.34E-04 | 1.2129338 | <i>MMP7</i>   | matrix metalloproteinase 7                                                 |
| 8063115 | 5.12E-09 | 1.1166764 | <i>MMP9</i>   | matrix metalloproteinase 9                                                 |
| 8087547 | 5.22E-16 | 1.1476047 | <i>MST1R</i>  | macrophage stimulating 1 receptor                                          |
| 7919669 | 1.87E-13 | 1.1160298 | <i>MTMR11</i> | myotubularin related protein 11                                            |
| 7920642 | 4.51E-06 | 1.1236976 | <i>MUC1</i>   | mucin 1, cell surface associated                                           |
| 8090180 | 1.44E-06 | 1.6196007 | <i>MUC13</i>  | mucin 13, cell surface associated                                          |
| 8033674 | 2.46E-09 | 1.2668127 | <i>MUC16</i>  | mucin 16, cell surface associated                                          |
| 8135048 | 9.06E-07 | 1.7016829 | <i>MUC17</i>  | mucin 17, cell surface associated                                          |
| 8171172 | 4.22E-08 | 1.1398482 | <i>MXRA5</i>  | matrix remodeling associated 5                                             |
| 7935058 | 4.50E-11 | 1.3488062 | <i>MYOF</i>   | myoferlin                                                                  |
| 8100464 | 2.02E-10 | 1.0295189 | <i>NMU</i>    | neuromedin U                                                               |
| 7950933 | 5.05E-13 | 1.6264947 | <i>NOX4</i>   | NADPH oxidase 4                                                            |
| 8104746 | 2.75E-08 | 1.2844418 | <i>NPR3</i>   | natriuretic peptide receptor 3                                             |
| 8002303 | 3.20E-13 | 1.4664629 | <i>NQO1</i>   | NAD(P)H quinone dehydrogenase 1                                            |
| 8047763 | 2.66E-08 | 1.2613624 | <i>NRP2</i>   | neuropilin 2                                                               |
| 8120967 | 2.80E-07 | 1.208268  | <i>NT5E</i>   | 5'-nucleotidase ecto                                                       |
| 7945245 | 1.21E-11 | 1.0137033 | <i>NTM</i>    | neurotrimin                                                                |
| 7958884 | 3.86E-10 | 1.130268  | <i>OAS1</i>   | 2'-5'-oligoadenylate synthetase 1                                          |
| 7958913 | 5.84E-09 | 1.0571731 | <i>OAS2</i>   | 2'-5'-oligoadenylate synthetase 2                                          |
| 8100298 | 5.13E-10 | 1.1130531 | <i>OCIAD2</i> | OCIA domain containing 2                                                   |
| 7961142 | 1.72E-05 | 1.2763264 | <i>OLR1</i>   | oxidized low density lipoprotein receptor 1                                |
| 8138613 | 3.71E-10 | 1.1831684 | <i>OSBPL3</i> | oxysterol binding protein like 3                                           |
| 7898413 | 2.37E-10 | 1.3742273 | <i>PADI1</i>  | peptidyl arginine deiminase 1                                              |
| 8094520 | 3.29E-12 | 1.0136969 | <i>PCDH7</i>  | protocadherin 7                                                            |
| 7950391 | 1.75E-11 | 1.0538702 | <i>PGM2L1</i> | phosphoglucomutase 2 like 1                                                |

|         |          |           |                 |                                                          |
|---------|----------|-----------|-----------------|----------------------------------------------------------|
| 7990151 | 1.10E-11 | 1.021846  | <i>PKM</i>      | pyruvate kinase, muscle                                  |
| 8056151 | 4.39E-09 | 1.1070027 | <i>PLA2R1</i>   | phospholipase A2 receptor 1                              |
| 8101429 | 8.34E-10 | 1.8359027 | <i>PLAC8</i>    | placenta specific 8                                      |
| 8150509 | 2.00E-08 | 1.3462227 | <i>PLAT</i>     | plasminogen activator, tissue type                       |
| 7928429 | 2.54E-10 | 1.3743673 | <i>PLAU</i>     | plasminogen activator, urokinase                         |
| 7979710 | 1.11E-14 | 1.2965764 | <i>PLEK2</i>    | pleckstrin 2                                             |
| 7930980 | 5.44E-15 | 1.1414518 | <i>PLPP4</i>    | phospholipid phosphatase 4                               |
| 8083146 | 1.05E-05 | 1.0651547 | <i>PLS1</i>     | plastin 1                                                |
| 7971077 | 6.76E-13 | 2.6298373 | <i>POSTN</i>    | periostin                                                |
| 7964907 | 2.94E-12 | 1.2630898 | <i>PTPRR</i>    | protein tyrosine phosphatase, receptor type R            |
| 8050007 | 4.54E-07 | 1.1653407 | <i>PXDN</i>     | peroxidasin                                              |
| 8104788 | 2.46E-09 | 1.0131847 | <i>RAI14</i>    | retinoic acid induced 14                                 |
| 7915184 | 1.90E-13 | 1.1258644 | <i>RHBDL2</i>   | rhomboid like 2                                          |
| 7933855 | 3.56E-11 | 1.0185636 | <i>RTKN2</i>    | rhotekin 2                                               |
| 8120043 | 4.49E-13 | 1.2121193 | <i>RUNX2</i>    | runt related transcription factor 2                      |
| 7920297 | 3.91E-10 | 1.2504989 | <i>S100A14</i>  | S100 calcium binding protein A14                         |
| 7920291 | 1.04E-12 | 1.1656542 | <i>S100A16</i>  | S100 calcium binding protein A16                         |
| 8093950 | 1.43E-17 | 1.2260793 | <i>S100P</i>    | S100 calcium binding protein P                           |
| 7969493 | 9.21E-14 | 1.6301907 | <i>SCEL</i>     | sciellin                                                 |
| 7960529 | 2.41E-07 | 1.0022056 | <i>SCNN1A</i>   | sodium channel epithelial 1 alpha subunit                |
| 8150889 | 2.50E-15 | 1.5155709 | <i>SDR16C5</i>  | short chain dehydrogenase/reductase family 16C, member 5 |
| 8140534 | 4.29E-05 | 1.0999293 | <i>SEMA3C</i>   | semaphorin 3C                                            |
| 7990345 | 2.29E-12 | 1.0218449 | <i>SEMA7A</i>   | semaphorin 7A (John Milton Hagen blood group)            |
| 8023696 | 7.48E-05 | 1.2747167 | <i>SERPINB3</i> | serpin family B member 3                                 |
| 8021584 | 1.26E-14 | 2.1830693 | <i>SERPINB5</i> | serpin family B member 5                                 |
| 7902127 | 1.52E-11 | 1.0548758 | <i>SGIP1</i>    | SH3 domain GRB2 like endophilin interacting protein 1    |
| 8010770 | 1.32E-13 | 1.0000809 | <i>SLC16A3</i>  | solute carrier family 16 member 3                        |
| 8123246 | 1.57E-07 | 1.14787   | <i>SLC22A3</i>  | solute carrier family 22 member 3                        |
| 7923850 | 2.85E-07 | 1.0173151 | <i>SLC26A9</i>  | solute carrier family 26 member 9                        |
| 7915472 | 2.13E-15 | 1.8381029 | <i>SLC2A1</i>   | solute carrier family 2 member 1                         |
| 8125149 | 1.29E-09 | 1.2232882 | <i>SLC44A4</i>  | solute carrier family 44 member 4                        |
| 8169504 | 2.65E-15 | 3.075768  | <i>SLC6A14</i>  | solute carrier family 6 member 14                        |
| 8078014 | 4.11E-10 | 1.2712856 | <i>SLC6A6</i>   | solute carrier family 6 member 6                         |

|         |          |           |                   |                                                            |
|---------|----------|-----------|-------------------|------------------------------------------------------------|
| 8044080 | 1.44E-10 | 1.0730247 | <i>SLC9A2</i>     | solute carrier family 9 member A2                          |
| 7954330 | 3.35E-05 | 1.1014516 | <i>SLCO1B3</i>    | solute carrier organic anion transporter family member 1B3 |
| 8066493 | 6.36E-11 | 1.7899024 | <i>SLPI</i>       | secretory leukocyte peptidase inhibitor                    |
| 8168749 | 2.01E-06 | 1.1052856 | <i>SRPX2</i>      | sushi repeat containing protein, X-linked 2                |
| 8018774 | 1.77E-09 | 1.028552  | <i>ST6GALNAC1</i> | ST6 N-acetylgalactosaminide alpha-2,6-sialyltransferase 1  |
| 7961215 | 2.27E-16 | 1.2155107 | <i>STYK1</i>      | serine/threonine/tyrosine kinase 1                         |
| 8146863 | 1.31E-10 | 1.9594916 | <i>SULF1</i>      | sulfatase 1                                                |
| 8066822 | 1.82E-06 | 1.0889349 | <i>SULF2</i>      | sulfatase 2                                                |
| 8100798 | 1.85E-05 | 1.0806951 | <i>SULT1B1</i>    | sulfotransferase family 1B member 1                        |
| 8044212 | 4.43E-05 | 1.0128167 | <i>SULT1C2</i>    | sulfotransferase family 1C member 2                        |
| 7950810 | 1.15E-10 | 1.0928962 | <i>SYTL2</i>      | synaptotagmin like 2                                       |
| 7948444 | 1.75E-05 | 1.5896369 | <i>TCN1</i>       | transcobalamin 1                                           |
| 8070579 | 9.91E-09 | 1.9432884 | <i>TFF1</i>       | trefoil factor 1                                           |
| 8070574 | 2.96E-05 | 1.1430847 | <i>TFF2</i>       | trefoil factor 2                                           |
| 8108217 | 5.41E-08 | 1.1341551 | <i>TGFBI</i>      | transforming growth factor beta induced                    |
| 8066214 | 8.35E-08 | 1.205276  | <i>TGM2</i>       | transglutaminase 2                                         |
| 8130867 | 4.55E-09 | 1.6264449 | <i>THBS2</i>      | thrombospondin 2                                           |
| 7993638 | 6.43E-09 | 1.7178244 | <i>TMC5</i>       | transmembrane channel like 5                               |
| 7993588 | 8.57E-15 | 1.285476  | <i>TMC7</i>       | transmembrane channel like 7                               |
| 7945169 | 1.21E-08 | 1.3963273 | <i>TMEM45B</i>    | transmembrane protein 45B                                  |
| 7944164 | 2.85E-16 | 2.2573618 | <i>TMPRSS4</i>    | transmembrane protease, serine 4                           |
| 8045688 | 1.54E-05 | 1.30502   | <i>TNFAIP6</i>    | TNF alpha induced protein 6                                |
| 8015016 | 2.19E-12 | 1.4127467 | <i>TNS4</i>       | tensin 4                                                   |
| 8014974 | 1.86E-09 | 1.3128398 | <i>TOP2A</i>      | topoisomerase (DNA) II alpha                               |
| 8061579 | 1.48E-09 | 1.1088969 | <i>TPX2</i>       | TPX2, microtubule nucleation factor                        |
| 8012953 | 1.65E-13 | 1.0200102 | <i>TRIM16</i>     | tripartite motif containing 16                             |
| 7952290 | 7.15E-14 | 1.4077371 | <i>TRIM29</i>     | tripartite motif containing 29                             |
| 8124707 | 4.49E-09 | 1.3998011 | <i>TRIM31</i>     | tripartite motif containing 31                             |
| 7901175 | 2.49E-18 | 2.7266844 | <i>TSPAN1</i>     | tetraspanin 1                                              |
| 7964927 | 9.05E-06 | 1.4074942 | <i>TSPAN8</i>     | tetraspanin 8                                              |
| 8106743 | 4.80E-08 | 1.7040513 | <i>VCAN</i>       | versican                                                   |
| 8169263 | 1.03E-09 | 1.9952567 | <i>VSIG1</i>      | V-set and immunoglobulin domain containing 1               |
| 8051322 | 4.34E-10 | 1.1333331 | <i>XDH</i>        | xanthine dehydrogenase                                     |

|         |          |            |                 |                                                               |
|---------|----------|------------|-----------------|---------------------------------------------------------------|
| 8163116 | 6.30E-07 | -1.0014458 | <i>EPB41L4B</i> | erythrocyte membrane protein band 4.1 like 4B                 |
| 7922846 | 5.04E-07 | -1.0048831 | <i>FAM129A</i>  | family with sequence similarity 129 member A                  |
| 7947496 | 6.83E-06 | -1.0052447 | <i>SLC1A2</i>   | solute carrier family 1 member 2                              |
| 8098654 | 1.25E-10 | -1.0101842 | <i>KLKB1</i>    | kallikrein B1                                                 |
| 8161755 | 1.73E-08 | -1.0122549 | <i>ALDH1A1</i>  | aldehyde dehydrogenase 1 family member A1                     |
| 7965884 | 3.44E-06 | -1.0185951 | <i>PAH</i>      | phenylalanine hydroxylase                                     |
| 7976322 | 2.99E-05 | -1.02353   | <i>CHGA</i>     | chromogranin A                                                |
| 8022666 | 3.28E-09 | -1.0283231 | <i>CHST9</i>    | carbohydrate sulfotransferase 9                               |
| 8113666 | 5.34E-10 | -1.0293164 | <i>SEMA6A</i>   | semaphorin 6A                                                 |
| 7976488 | 8.47E-05 | -1.0333527 | <i>SERPINA5</i> | serpin family A member 5                                      |
| 8060134 | 9.80E-10 | -1.0356758 | <i>KIF1A</i>    | kinesin family member 1A                                      |
| 8174513 | 6.56E-05 | -1.0388273 | <i>CHRD1</i>    | chordin like 1                                                |
| 8121515 | 5.26E-05 | -1.0443833 | <i>SLC16A10</i> | solute carrier family 16 member 10                            |
| 8149927 | 3.58E-11 | -1.0502238 | <i>CLU</i>      | clusterin                                                     |
| 8135378 | 7.42E-10 | -1.0549731 | <i>PRKAR2B</i>  | protein kinase cAMP-dependent type II regulatory subunit beta |
| 8068684 | 5.66E-04 | -1.0574936 | <i>FAM3B</i>    | family with sequence similarity 3 member B                    |
| 8146687 | 3.89E-10 | -1.0653827 | <i>ADHFE1</i>   | alcohol dehydrogenase, iron containing 1                      |
| 8054281 | 4.54E-12 | -1.0700796 | <i>LONRF2</i>   | LON peptidase N-terminal domain and ring finger 2             |
| 7922130 | 1.37E-06 | -1.0727789 | <i>DPT</i>      | dermatopontin                                                 |
| 7910915 | 1.69E-05 | -1.0729804 | <i>CHRM3</i>    | cholinergic receptor muscarinic 3                             |
| 8041727 | 1.42E-03 | -1.073476  | <i>SLC3A1</i>   | solute carrier family 3 member 1                              |
| 7993126 | 1.13E-08 | -1.0759596 | <i>ABAT</i>     | 4-aminobutyrate aminotransferase                              |
| 8015884 | 1.36E-02 | -1.0792696 | <i>PPY</i>      | pancreatic polypeptide                                        |
| 7937079 | 6.24E-06 | -1.093632  | <i>BNIP3</i>    | BCL2 interacting protein 3                                    |
| 7938687 | 5.50E-07 | -1.0996724 | <i>NUCB2</i>    | nucleobindin 2                                                |
| 7949320 | 5.08E-06 | -1.10197   | <i>GPHA2</i>    | glycoprotein hormone alpha 2                                  |
| 7930714 | 1.30E-08 | -1.1040269 | <i>ATRNL1</i>   | attractin like 1                                              |
| 7924309 | 1.15E-09 | -1.1041791 | <i>ESRRG</i>    | estrogen related receptor gamma                               |
| 8017885 | 1.29E-06 | -1.104388  | <i>ABCA8</i>    | ATP binding cassette subfamily A member 8                     |
| 8049990 | 1.60E-08 | -1.1093278 | <i>FAM150B</i>  | family with sequence similarity 150 member B                  |
| 7988987 | 1.52E-04 | -1.1098869 | <i>ONECUT1</i>  | one cut homeobox 1                                            |
| 7944795 | 6.30E-07 | -1.1183533 | <i>OR4D5</i>    | olfactory receptor family 4 subfamily D member 5              |
| 7933194 | 3.74E-12 | -1.1287498 | <i>CXCL12</i>   | C-X-C motif chemokine ligand 12                               |

|         |          |            |                |                                                               |
|---------|----------|------------|----------------|---------------------------------------------------------------|
| 7913768 | 7.64E-05 | -1.1288124 | <i>IL22RA1</i> | interleukin 22 receptor subunit alpha 1                       |
| 8166784 | 3.70E-11 | -1.1334431 | <i>TSPAN7</i>  | tetraspanin 7                                                 |
| 8176193 | 6.97E-07 | -1.1382302 | <i>F8</i>      | coagulation factor VIII                                       |
| 8056250 | 2.42E-02 | -1.13885   | <i>GCG</i>     | glucagon                                                      |
| 8106827 | 2.44E-09 | -1.1424538 | <i>ADGRV1</i>  | adhesion G protein-coupled receptor V1                        |
| 7986195 | 1.21E-08 | -1.1493667 | <i>SV2B</i>    | synaptic vesicle glycoprotein 2B                              |
| 8114964 | 1.26E-02 | -1.1548584 | <i>SPINK1</i>  | serine peptidase inhibitor, Kazal type 1                      |
| 7909681 | 1.77E-10 | -1.1566953 | <i>PROX1</i>   | prospero homeobox 1                                           |
| 7922598 | 1.40E-11 | -1.1579211 | <i>ANGPTL1</i> | angiopoietin like 1                                           |
| 7976350 | 3.71E-10 | -1.1597007 | <i>UNC79</i>   | unc-79 homolog (C. elegans)                                   |
| 7917304 | 2.28E-09 | -1.1641287 | <i>MCOLN3</i>  | mucolipin 3                                                   |
| 8105607 | 1.61E-06 | -1.1697213 | <i>FAM159B</i> | family with sequence similarity 159 member B                  |
| 8029693 | 7.21E-06 | -1.1699062 | <i>FOSB</i>    | FosB proto-oncogene, AP-1 transcription factor subunit        |
| 7908917 | 1.26E-10 | -1.1710536 | <i>BTG2</i>    | BTG anti-proliferation factor 2                               |
| 7948249 | 5.52E-07 | -1.1801271 | <i>SLC43A1</i> | solute carrier family 43 member 1                             |
| 7976073 | 5.50E-10 | -1.1848582 | <i>FLRT2</i>   | fibronectin leucine rich transmembrane protein 2              |
| 8127072 | 4.43E-06 | -1.1862356 | <i>GSTA1</i>   | glutathione S-transferase alpha 1                             |
| 8163839 | 1.30E-07 | -1.1974638 | <i>C5</i>      | complement component 5                                        |
| 7983718 | 2.92E-07 | -1.2012936 | <i>SCG3</i>    | secretogranin III                                             |
| 8057377 | 3.89E-11 | -1.2015218 | <i>CCDC141</i> | coiled-coil domain containing 141                             |
| 8044700 | 2.52E-06 | -1.204828  | <i>DPP10</i>   | dipeptidyl peptidase like 10                                  |
| 8126954 | 1.03E-03 | -1.2130362 | <i>PKHD1</i>   | polycystic kidney and hepatic disease 1 (autosomal recessive) |
| 8154848 | 1.02E-04 | -1.2143664 | <i>PRSS3</i>   | protease, serine 3                                            |
| 7989473 | 2.64E-07 | -1.2225682 | <i>C2CD4B</i>  | C2 calcium dependent domain containing 4B                     |
| 8001531 | 5.08E-06 | -1.2238896 | <i>MT1G</i>    | metallothionein 1G                                            |
| 7991034 | 2.00E-06 | -1.248792  | <i>HOMER2</i>  | homer scaffolding protein 2                                   |
| 8056327 | 1.63E-07 | -1.2659649 | <i>GRB14</i>   | growth factor receptor bound protein 14                       |
| 7946579 | 1.42E-05 | -1.2742767 | <i>LYVE1</i>   | lymphatic vessel endothelial hyaluronan receptor 1            |
| 7951910 | 1.16E-07 | -1.2745662 | <i>BACE1</i>   | beta-secretase 1                                              |
| 7956229 | 1.41E-06 | -1.2896791 | <i>SLC39A5</i> | solute carrier family 39 member 5                             |
| 8133876 | 1.18E-07 | -1.2904853 | <i>CD36</i>    | CD36 molecule                                                 |
| 8167027 | 7.44E-09 | -1.2929591 | <i>RGN</i>     | regucalcin                                                    |
| 8036699 | 2.95E-05 | -1.2944747 | <i>SYCN</i>    | syncollin                                                     |

|         |          |            |                |                                                       |
|---------|----------|------------|----------------|-------------------------------------------------------|
| 8100853 | 5.86E-05 | -1.3070631 | <i>GC</i>      | GC, vitamin D binding protein                         |
| 8145532 | 1.13E-11 | -1.309602  | <i>EPHX2</i>   | epoxide hydrolase 2                                   |
| 8042978 | 1.40E-03 | -1.3113611 | <i>REG3G</i>   | regenerating family member 3 gamma                    |
| 8124196 | 1.33E-05 | -1.3135133 | <i>DCDC2</i>   | doublecortin domain containing 2                      |
| 8089402 | 1.17E-06 | -1.321844  | <i>GUCA1C</i>  | guanylate cyclase activator 1C                        |
| 8092682 | 1.64E-06 | -1.3220569 | <i>SST</i>     | somatostatin                                          |
| 8113234 | 1.93E-09 | -1.3241064 | <i>PCSK1</i>   | proprotein convertase subtilisin/kexin type 1         |
| 8174201 | 2.54E-09 | -1.3355184 | <i>BEX1</i>    | brain expressed X-linked 1                            |
| 8111677 | 5.47E-11 | -1.3452642 | <i>LIFR</i>    | leukemia inhibitory factor receptor alpha             |
| 8166202 | 4.45E-06 | -1.3544622 | <i>GRPR</i>    | gastrin releasing peptide receptor                    |
| 8148003 | 3.28E-05 | -1.3557504 | <i>SLC30A8</i> | solute carrier family 30 member 8                     |
| 8052372 | 8.15E-06 | -1.3568427 | <i>MIR217</i>  | microRNA 217                                          |
| 7961580 | 9.74E-12 | -1.3596111 | <i>LMO3</i>    | LIM domain only 3                                     |
| 8074201 | 5.00E-07 | -1.3759078 | <i>ANKRD62</i> | ankyrin repeat domain 62                              |
| 8110990 | 4.60E-08 | -1.3781816 | <i>CTNND2</i>  | catenin delta 2                                       |
| 7923837 | 5.61E-06 | -1.380062  | <i>PM20D1</i>  | peptidase M20 domain containing 1                     |
| 8135661 | 5.01E-03 | -1.3874427 | <i>CFTR</i>    | cystic fibrosis transmembrane conductance regulator   |
| 8119620 | 1.70E-05 | -1.3901202 | <i>GNMT</i>    | glycine N-methyltransferase                           |
| 8141016 | 4.15E-07 | -1.4106651 | <i>TFPI2</i>   | tissue factor pathway inhibitor 2                     |
| 8117304 | 1.00E-05 | -1.4346631 | <i>SLC17A4</i> | solute carrier family 17 member 4                     |
| 8169389 | 5.30E-08 | -1.4388473 | <i>PAK3</i>    | p21 (RAC1) activated kinase 3                         |
| 8127065 | 6.38E-07 | -1.4493653 | <i>GSTA2</i>   | glutathione S-transferase alpha 2                     |
| 8105084 | 7.84E-06 | -1.4541744 | <i>C7</i>      | complement component 7                                |
| 8046116 | 1.49E-07 | -1.4543064 | <i>G6PC2</i>   | glucose-6-phosphatase catalytic subunit 2             |
| 8057056 | 1.78E-11 | -1.4561933 | <i>TTN</i>     | titin                                                 |
| 8158987 | 2.16E-06 | -1.4747756 | <i>CELP</i>    | carboxyl ester lipase pseudogene                      |
| 8095585 | 1.26E-04 | -1.5267887 | <i>SLC4A4</i>  | solute carrier family 4 member 4                      |
| 8136801 | 2.13E-04 | -1.5307853 | <i>PRSS3P2</i> | protease, serine 3 pseudogene 2                       |
| 8111864 | 4.60E-08 | -1.5355449 | <i>C6</i>      | complement component 6                                |
| 8020795 | 2.20E-03 | -1.5423422 | <i>TTR</i>     | transthyretin                                         |
| 7994252 | 1.40E-06 | -1.5447562 | <i>AQP8</i>    | aquaporin 8                                           |
| 8144786 | 3.48E-11 | -1.5674787 | <i>SLC7A2</i>  | solute carrier family 7 member 2                      |
| 8009493 | 5.72E-06 | -1.5883822 | <i>KCNJ16</i>  | potassium voltage-gated channel subfamily J member 16 |

|         |          |            |                 |                                                                             |
|---------|----------|------------|-----------------|-----------------------------------------------------------------------------|
| 8141094 | 1.33E-08 | -1.61166   | <i>PK4</i>      | pyruvate dehydrogenase kinase 4                                             |
| 7944793 | 3.26E-07 | -1.6139998 | <i>OR8D4</i>    | olfactory receptor family 8 subfamily D member 4                            |
| 8053341 | 2.80E-03 | -1.6238604 | <i>REG3A</i>    | regenerating family member 3 alpha                                          |
| 8151532 | 8.18E-06 | -1.6241164 | <i>FABP4</i>    | fatty acid binding protein 4                                                |
| 8142270 | 1.12E-08 | -1.6280118 | <i>NRCAM</i>    | neuronal cell adhesion molecule                                             |
| 7990555 | 8.69E-06 | -1.6338384 | <i>NRG4</i>     | neuregulin 4                                                                |
| 7988414 | 7.45E-05 | -1.6627798 | <i>GATM</i>     | glycine amidinotransferase                                                  |
| 8149521 | 1.94E-05 | -1.6669633 | <i>FGL1</i>     | fibrinogen like 1                                                           |
| 8058591 | 2.09E-08 | -1.6686389 | <i>ACADL</i>    | acyl-CoA dehydrogenase, long chain                                          |
| 8101881 | 4.00E-08 | -1.6765011 | <i>ADH1B</i>    | alcohol dehydrogenase 1B (class I), beta polypeptide                        |
| 7957221 | 5.25E-07 | -1.680468  | <i>TRHDE</i>    | thyrotropin releasing hormone degrading enzyme                              |
| 8062948 | 8.62E-07 | -1.7077773 | <i>RBPJL</i>    | recombination signal binding protein for immunoglobulin kappa J region like |
| 8117288 | 3.72E-07 | -1.7441982 | <i>SCGN</i>     | secretagogin, EF-hand calcium binding protein                               |
| 8042986 | 6.69E-04 | -1.7448384 | <i>REG1A</i>    | regenerating family member 1 alpha                                          |
| 8136795 | 2.30E-04 | -1.7786876 | <i>PRSS1</i>    | protease, serine 1                                                          |
| 8083246 | 3.07E-04 | -1.8422931 | <i>CPB1</i>     | carboxypeptidase B1                                                         |
| 7934936 | 1.94E-09 | -1.8661882 | <i>SLC16A12</i> | solute carrier family 16 member 12                                          |
| 7991335 | 1.81E-07 | -1.8945569 | <i>ANPEP</i>    | alanyl aminopeptidase, membrane                                             |
| 8002283 | 6.04E-08 | -1.8966689 | <i>TMED6</i>    | transmembrane p24 trafficking protein 6                                     |
| 8038633 | 4.35E-06 | -1.9187229 | <i>KLK1</i>     | kallikrein 1                                                                |
| 7925342 | 5.57E-11 | -1.9621349 | <i>ERO1B</i>    | endoplasmic reticulum oxidoreductase 1 beta                                 |
| 8098671 | 4.77E-08 | -2.006714  | <i>F11</i>      | coagulation factor XI                                                       |
| 8047300 | 6.71E-12 | -2.0361547 | <i>AOX1</i>     | aldehyde oxidase 1                                                          |
| 7908597 | 1.63E-07 | -2.0610724 | <i>NR5A2</i>    | nuclear receptor subfamily 5 group A member 2                               |
| 7903592 | 1.35E-08 | -2.0721882 | <i>KIAA1324</i> | KIAA1324                                                                    |
| 7898713 | 2.25E-05 | -2.0730927 | <i>CELA3B</i>   | chymotrypsin like elastase family member 3B                                 |
| 8096845 | 2.96E-06 | -2.0791816 | <i>EGF</i>      | epidermal growth factor                                                     |
| 8136235 | 1.22E-04 | -2.0943071 | <i>CPA1</i>     | carboxypeptidase A1                                                         |
| 7991815 | 4.02E-07 | -2.1084087 | <i>PDIA2</i>    | protein disulfide isomerase family A member 2                               |
| 8053337 | 2.53E-04 | -2.1295849 | <i>REG1CP</i>   | regenerating family member 1 gamma, pseudogene                              |
| 8053330 | 4.80E-04 | -2.1335769 | <i>REG1B</i>    | regenerating family member 1 beta                                           |
| 8002121 | 1.73E-06 | -2.2352664 | <i>CTRL</i>     | chymotrypsin like                                                           |
| 7898725 | 2.93E-05 | -2.2463916 | <i>CELA3A</i>   | chymotrypsin like elastase family member 3A                                 |



|         |          |            |                 |                                             |
|---------|----------|------------|-----------------|---------------------------------------------|
| 7898184 | 1.02E-05 | -2.2770016 | <i>CELA2B</i>   | chymotrypsin like elastase family member 2B |
| 7898176 | 1.43E-05 | -2.2827218 | <i>CELA2A</i>   | chymotrypsin like elastase family member 2A |
| 7967034 | 2.51E-05 | -2.3100656 | <i>PLA2G1B</i>  | phospholipase A2 group IB                   |
| 8091910 | 1.28E-06 | -2.4767376 | <i>SERPINI2</i> | serpin family I member 2                    |
| 8125936 | 1.29E-05 | -2.5449413 | <i>CLPS</i>     | colipase                                    |
| 7961524 | 1.64E-06 | -2.5885804 | <i>ERP27</i>    | endoplasmic reticulum protein 27            |
| 8095628 | 1.43E-07 | -2.6310982 | <i>ALB</i>      | albumin                                     |
| 8136187 | 2.38E-05 | -2.6502338 | <i>CPA2</i>     | carboxypeptidase A2                         |
| 8158976 | 1.14E-05 | -2.71677   | <i>CEL</i>      | carboxyl ester lipase                       |
| 7999920 | 8.79E-06 | -2.793808  | <i>GP2</i>      | glycoprotein 2                              |
| 7898167 | 3.47E-06 | -2.7982229 | <i>CTRC</i>     | chymotrypsin C                              |
| 7954377 | 2.36E-09 | -2.809762  | <i>IAPP</i>     | islet amyloid polypeptide                   |
| 7930790 | 2.37E-06 | -3.0266571 | <i>PNLIPRP1</i> | pancreatic lipase related protein 1         |

---

**Table S3. The 4 DEmiRNAs' targets for 47 of the 98 downregulated genes were found in the two GEO databases**

| <b>miR-222-3p</b> | <b>miR-345-5p</b> | <b>miR-100-5p</b> | <b>miR-221-3p</b> |
|-------------------|-------------------|-------------------|-------------------|
| <i>ACADL</i>      | <i>ACADL</i>      | <i>ADH1B</i>      | <i>ACADL</i>      |
| <i>ADH1B</i>      | <i>ADH1B</i>      | <i>EPHX2</i>      | <i>ADH1B</i>      |
| <i>BNIP3</i>      | <i>AOX1</i>       | <i>G6PC2</i>      | <i>BNIP3</i>      |
| <i>C6</i>         | <i>BACE1</i>      | <i>IL22RA1</i>    | <i>C6</i>         |
| <i>CHRM3</i>      | <i>BNIP3</i>      | <i>LMO3</i>       | <i>CHRM3</i>      |
| <i>DPP10</i>      | <i>C5</i>         | <i>SLC17A4</i>    | <i>DPP10</i>      |
| <i>EGF</i>        | <i>CHRM3</i>      | <i>SLC4A4</i>     | <i>EGF</i>        |
| <i>EPHX2</i>      | <i>CTNND2</i>     |                   | <i>EPHX2</i>      |
| <i>FAM3B</i>      | <i>DPP10</i>      |                   | <i>FAM3B</i>      |
| <i>KIAA1324</i>   | <i>EGF</i>        |                   | <i>FGL1</i>       |
| <i>LMO3</i>       | <i>EPHX2</i>      |                   | <i>KIAA1324</i>   |
| <i>NR5A2</i>      | <i>ERO1B</i>      |                   | <i>LMO3</i>       |
| <i>NRG4</i>       | <i>ERP27</i>      |                   | <i>NR5A2</i>      |
| <i>ONECUT1</i>    | <i>F11</i>        |                   | <i>NRG4</i>       |
| <i>PAK3</i>       | <i>F8</i>         |                   | <i>ONECUT1</i>    |
| <i>PKHD1</i>      | <i>FABP4</i>      |                   | <i>PAK3</i>       |
| <i>SLC17A4</i>    | <i>G6PC2</i>      |                   | <i>PKHD1</i>      |
| <i>SLC4A4</i>     | <i>GATM</i>       |                   | <i>SLC17A4</i>    |
| <i>SLC7A2</i>     | <i>GRB14</i>      |                   | <i>SLC4A4</i>     |
| <i>TTR</i>        | <i>GRPR</i>       |                   | <i>SLC7A2</i>     |
|                   | <i>GUCA1C</i>     |                   | <i>TTR</i>        |
|                   | <i>IAPP</i>       |                   |                   |
|                   | <i>IL22RA1</i>    |                   |                   |
|                   | <i>KIAA1324</i>   |                   |                   |
|                   | <i>LMO3</i>       |                   |                   |
|                   | <i>NR5A2</i>      |                   |                   |
|                   | <i>NRCAM</i>      |                   |                   |
|                   | <i>NRG4</i>       |                   |                   |
|                   | <i>NUCB2</i>      |                   |                   |
|                   | <i>ONECUT1</i>    |                   |                   |
|                   | <i>PAK3</i>       |                   |                   |
|                   | <i>PDK4</i>       |                   |                   |
|                   | <i>PKHD1</i>      |                   |                   |
|                   | <i>PM20D1</i>     |                   |                   |
|                   | <i>REG3A</i>      |                   |                   |
|                   | <i>REG3G</i>      |                   |                   |
|                   | <i>RGN</i>        |                   |                   |
|                   | <i>SLC17A4</i>    |                   |                   |
|                   | <i>SLC4A4</i>     |                   |                   |
|                   | <i>SLC7A2</i>     |                   |                   |
|                   | <i>TFPI2</i>      |                   |                   |

*TRHDE*

*TTN*

*TTR*

---

Table S4. Clinicopathological features of samples used in this study.

| Type of samples | Cohort                      | Assay                               | Sample     | Gender | Age | Alcohol | Smoking | Ethnicity       | Tumor size | TNM | Differentiation grade | Survival |
|-----------------|-----------------------------|-------------------------------------|------------|--------|-----|---------|---------|-----------------|------------|-----|-----------------------|----------|
| Tissue          | First Cohort Controls (13)  | Microarrays Identification=3        | Control 1  | F      | 36  | -       | -       | Mexican-Mestizo | -          | -   | -                     | -        |
|                 |                             |                                     | Control 2  | F      | 49  | -       | -       | Mexican-Mestizo | -          | -   | -                     | -        |
|                 |                             |                                     | Control 3  | M      | 52  | -       | -       | Mexican-Mestizo | -          | -   | -                     | -        |
|                 |                             | Validation (pool) RT-qPCR=10        | Control 4  | M      | 50  | -       | -       | Mexican-Mestizo | -          | -   | -                     | -        |
|                 |                             |                                     | Control 5  | M      | 50  | -       | -       | Mexican-Mestizo | -          | -   | -                     | -        |
|                 |                             |                                     | Control 6  | F      | 47  | -       | -       | Mexican-Mestizo | -          | -   | -                     | -        |
|                 |                             |                                     | Control 7  | F      | 58  | -       | -       | Mexican-Mestizo | -          | -   | -                     | -        |
|                 |                             |                                     | Control 8  | F      | 64  | -       | -       | Mexican-Mestizo | -          | -   | -                     | -        |
|                 |                             |                                     | Control 9  | M      | 59  | -       | -       | Mexican-Mestizo | -          | -   | -                     | -        |
|                 |                             |                                     | Control 10 | M      | 78  | -       | -       | Mexican-Mestizo | -          | -   | -                     | -        |
|                 |                             |                                     | Control 11 | M      | 73  | -       | -       | Mexican-Mestizo | -          | -   | -                     | -        |
|                 |                             |                                     | Control 12 | M      | 70  | -       | -       | Mexican-Mestizo | -          | -   | -                     | -        |
|                 |                             |                                     | Control 13 | M      | 66  | -       | -       | Mexican-Mestizo | -          | -   | -                     | -        |
|                 | Second Cohort Controls (15) | Validation (independent) RT-qPCR=15 | Control 14 | M      | 31  | -       | -       | Mexican-Mestizo | -          | -   | -                     | -        |
|                 |                             |                                     | Control 15 | M      | 49  | -       | -       | Mexican-Mestizo | -          | -   | -                     | -        |
|                 |                             |                                     | Control 16 | F      | 28  | -       | -       | Mexican-Mestizo | -          | -   | -                     | -        |
|                 |                             |                                     | Control 17 | F      | 38  | -       | -       | Mexican-Mestizo | -          | -   | -                     | -        |
|                 |                             |                                     | Control 18 | M      | 26  | -       | -       | Mexican-Mestizo | -          | -   | -                     | -        |

|  |                            |                               |            |   |    |         |         |                 |      |     |    |    |
|--|----------------------------|-------------------------------|------------|---|----|---------|---------|-----------------|------|-----|----|----|
|  |                            |                               | Control 19 | F | 33 | -       | -       | Mexican-Mestizo | -    | -   | -  | -  |
|  |                            |                               | Control 20 | M | 74 | -       | -       | Mexican-Mestizo | -    | -   | -  | -  |
|  |                            |                               | Control 21 | F | 26 | -       | -       | Mexican-Mestizo | -    | -   | -  | -  |
|  |                            |                               | Control 22 | M | 60 | -       | -       | Mexican-Mestizo | -    | -   | -  | -  |
|  |                            |                               | Control 23 | M | 40 | -       | -       | Mexican-Mestizo | -    | -   | -  | -  |
|  |                            |                               | Control 24 | M | 27 | -       | -       | Mexican-Mestizo | -    | -   | -  | -  |
|  |                            |                               | Control 25 | M | 65 | -       | -       | Mexican-Mestizo | -    | -   | -  | -  |
|  |                            |                               | Control 26 | M | 27 | -       | -       | Mexican-Mestizo | -    | -   | -  | -  |
|  |                            |                               | Control 27 | F | 64 | -       | -       | Mexican-Mestizo | -    | -   | -  | -  |
|  |                            |                               | Control 28 | F | 52 | -       | -       | Mexican-Mestizo | -    | -   | -  | -  |
|  | First Cohort Patients (25) | Microarrays Identification=12 | Patient 1  | M | 66 | No data | No data | Mexican-Mestizo | 5.5  | IIA | G2 | -  |
|  |                            |                               | Patient 2  | F | 66 | No data | No data | Mexican-Mestizo | -    | IIA | G2 | 13 |
|  |                            |                               | Patient 3  | F | 57 | No data | No data | Mexican-Mestizo | 5.5  | IIA | G2 | -  |
|  |                            |                               | Patient 4  | M | 48 | No data | No data | Mexican-Mestizo | 5.1  | IIB | G2 | 18 |
|  |                            |                               | Patient 5  | M | 75 | No data | No data | Mexican-Mestizo | -    | IIB | G2 | 12 |
|  |                            |                               | Patient 6  | F | 47 | No data | No data | Mexican-Mestizo | 9    | IIB | G2 | 11 |
|  |                            |                               | Patient 7  | M | 78 | No data | No data | Mexican-Mestizo | 7.4  | III | G1 | 4  |
|  |                            |                               | Patient 8  | M | 40 | No data | No data | Mexican-Mestizo | 2.59 | III | G2 | 20 |
|  |                            |                               | Patient 9  | M | 61 | No data | No data | Mexican-Mestizo | 6.8  | III | G3 | 4  |

|  |                                |                                           |            |   |    |         |         |                 |      |     |    |    |
|--|--------------------------------|-------------------------------------------|------------|---|----|---------|---------|-----------------|------|-----|----|----|
|  |                                |                                           | Patient 10 | F | 66 | No data | No data | Mexican-Mestizo | 40   | IV  | G2 | 1  |
|  |                                |                                           | Patient 11 | F | 64 | No data | No data | Mexican-Mestizo | -    | IV  | G2 | -  |
|  |                                |                                           | Patient 12 | M | 54 | No data | No data | Mexican-Mestizo | -    | IV  | G3 | 10 |
|  |                                | Validation (pool)<br>RT-qPCR=13           | Patient 13 | F | 81 | No data | No data | Mexican-Mestizo | 5    | IIB | G2 | 14 |
|  |                                |                                           | Patient 14 | M | 66 | No data | No data | Mexican-Mestizo | 5    | IIB | G2 | 14 |
|  |                                |                                           | Patient 15 | M | 52 | No data | No data | Mexican-Mestizo | 3    | IIB | G2 | 5  |
|  |                                |                                           | Patient 16 | M | 72 | No data | No data | Mexican-Mestizo | 3.96 | III | G3 | 9  |
|  |                                |                                           | Patient 17 | M | 70 | No data | No data | Mexican-Mestizo | 2.1  | III | G2 | 9  |
|  |                                |                                           | Patient 18 | M | 47 | No data | No data | Mexican-Mestizo | 2.1  | III | G2 | -  |
|  |                                |                                           | Patient 19 | F | 55 | No data | No data | Mexican-Mestizo | 16   | III | G2 | 16 |
|  |                                |                                           | Patient 20 | F | 42 | No data | No data | Mexican-Mestizo | 4.1  | IV  | G2 | 20 |
|  |                                |                                           | Patient 21 | F | 56 | No data | No data | Mexican-Mestizo | 5    | IV  | G2 | 3  |
|  |                                |                                           | Patient 22 | F | 62 | No data | No data | Mexican-Mestizo | -    | IV  | G2 | 1  |
|  |                                |                                           | Patient 23 | F | 68 | No data | No data | Mexican-Mestizo | 5    | IV  | G3 | 10 |
|  |                                |                                           | Patient 24 | F | 54 | No data | No data | Mexican-Mestizo | -    | IV  | G3 | -  |
|  |                                |                                           | Patient 25 | F | 69 | No data | No data | Mexican-Mestizo | 6    | IV  | G3 | -  |
|  | Second Cohort<br>Patients (15) | Validation<br>(independent)<br>RT-qPCR=15 | Patient 26 | F | 86 | No data | No data | Mexican-Mestizo | 2.1  | IIB | G2 | -  |
|  |                                |                                           | Patient 27 | M | 60 | No data | No data | Mexican-Mestizo | 6    | IIB | G2 | -  |
|  |                                |                                           | Patient 28 | F | 75 | No data | No data | Mexican-Mestizo | -    | -   | G2 | -  |

|        |                            |                                     |            |   |    |         |         |                 |     |     |    |     |
|--------|----------------------------|-------------------------------------|------------|---|----|---------|---------|-----------------|-----|-----|----|-----|
|        |                            |                                     | Patient 29 | F | 77 | No data | No data | Mexican-Mestizo | 4   | IIB | G2 | -   |
|        |                            |                                     | Patient 30 | F | 62 | No data | No data | Mexican-Mestizo | -   | -   | G2 | -   |
|        |                            |                                     | Patient 31 | M | 65 | No data | No data | Mexican-Mestizo | -   | -   | G2 | -   |
|        |                            |                                     | Patient 32 | M | 64 | No data | No data | Mexican-Mestizo | 3.2 | IIA | G2 | -   |
|        |                            |                                     | Patient 33 | F | 77 | No data | No data | Mexican-Mestizo | 4   | IIB | G2 | -   |
|        |                            |                                     | Patient 34 | M | 68 | No data | No data | Mexican-Mestizo | -   | IIA | -  | -   |
|        |                            |                                     | Patient 35 | F | 58 | No data | No data | Mexican-Mestizo | -   | IIA | G2 | -   |
|        |                            |                                     | Patient 36 | F | 66 | No data | No data | Mexican-Mestizo | -   | IIA | G2 | 132 |
|        |                            |                                     | Patient 37 | F | 47 | No data | No data | Mexican-Mestizo | 9   | IIB | G2 | 11  |
|        |                            |                                     | Patient 38 | M | 78 | No data | No data | Mexican-Mestizo | 7.4 | III | G1 | 46  |
|        |                            |                                     | Patient 39 | F | 64 | No data | No data | Mexican-Mestizo | -   | IV  | G2 | -   |
|        |                            |                                     | Patient 40 | F | 68 | No data | No data | Mexican-Mestizo | 5   | IV  | G3 | 10  |
| Plasma | First Cohort Controls (20) | Validation (independent) RT-qPCR=20 | Control 1  | F | 43 | -       | -       | Mexican-Mestizo | -   | -   | -  | -   |
|        |                            |                                     | Control 2  | F | 47 | -       | -       | Mexican-Mestizo | -   | -   | -  | -   |
|        |                            |                                     | Control 3  | F | 51 | -       | -       | Mexican-Mestizo | -   | -   | -  | -   |
|        |                            |                                     | Control 4  | M | 54 | -       | -       | Mexican-Mestizo | -   | -   | -  | -   |
|        |                            |                                     | Control 5  | F | 47 | -       | -       | Mexican-Mestizo | -   | -   | -  | -   |
|        |                            |                                     | Control 6  | F | 39 | -       | -       | Mexican-Mestizo | -   | -   | -  | -   |
|        |                            |                                     | Control 7  | F | 56 | -       | -       | Mexican-Mestizo | -   | -   | -  | -   |

|  |                            |                                     |            |   |    |     |     |                 |   |     |   |   |
|--|----------------------------|-------------------------------------|------------|---|----|-----|-----|-----------------|---|-----|---|---|
|  |                            |                                     | Control 8  | F | 45 | -   | -   | Mexican-Mestizo | - | -   | - | - |
|  |                            |                                     | Control 9  | F | 62 | -   | -   | Mexican-Mestizo | - | -   | - | - |
|  |                            |                                     | Control 10 | M | 49 | -   | -   | Mexican-Mestizo | - | -   | - | - |
|  |                            |                                     | Control 11 | M | 47 | -   | -   | Mexican-Mestizo | - | -   | - | - |
|  |                            |                                     | Control 12 | M | 44 | -   | -   | Mexican-Mestizo | - | -   | - | - |
|  |                            |                                     | Control 13 | M | 30 | -   | -   | Mexican-Mestizo | - | -   | - | - |
|  |                            |                                     | Control 14 | M | 30 | -   | -   | Mexican-Mestizo | - | -   | - | - |
|  |                            |                                     | Control 15 | F | 57 | -   | -   | Mexican-Mestizo | - | -   | - | - |
|  |                            |                                     | Control 16 | M | 27 | -   | -   | Mexican-Mestizo | - | -   | - | - |
|  |                            |                                     | Control 17 | M | 31 | -   | -   | Mexican-Mestizo | - | -   | - | - |
|  |                            |                                     | Control 18 | M | 27 | -   | -   | Mexican-Mestizo | - | -   | - | - |
|  |                            |                                     | Control 19 | F | 27 | -   | -   | Mexican-Mestizo | - | -   | - | - |
|  |                            |                                     | Control 20 | F | 50 | -   | -   | Mexican-Mestizo | - | -   | - | - |
|  | First Cohort Patients (46) | Validation (independent) RT-qPCR=46 | Patient 1  | F | 63 | No  | No  | Mexican-Mestizo | - | IV  | - | - |
|  |                            |                                     | Patient 2  | M | 44 | No  | Yes | Mexican-Mestizo | - | III | - | - |
|  |                            |                                     | Patient 3  | F | 70 | Yes | Yes | Mexican-Mestizo | - | IV  | - | - |
|  |                            |                                     | Patient 4  | F | 69 | Yes | No  | Mexican-Mestizo | - | III | - | - |
|  |                            |                                     | Patient 5  | F | 56 | No  | No  | Mexican-Mestizo | - | III | - | - |
|  |                            |                                     | Patient 6  | M | 78 | No  | No  | Mexican-Mestizo | - | III | - | - |



|  |  |  |            |   |    |         |         |                 |   |     |   |   |
|--|--|--|------------|---|----|---------|---------|-----------------|---|-----|---|---|
|  |  |  | Patient 7  | F | 79 | No      | No      | Mexican-Mestizo | - | IV  | - | - |
|  |  |  | Patient 8  | F | 82 | No      | Yes     | Mexican-Mestizo | - | IV  | - | - |
|  |  |  | Patient 9  | F | 51 | Yes     | Yes     | Mexican-Mestizo | - | III | - | - |
|  |  |  | Patient 10 | F | 70 | No      | No      | Mexican-Mestizo | - | IV  | - | - |
|  |  |  | Patient 11 | F | 41 | No      | No      | Mexican-Mestizo | - | IV  | - | - |
|  |  |  | Patient 12 | M | 48 | No      | No      | Mexican-Mestizo | - | III | - | - |
|  |  |  | Patient 13 | F | 83 | Yes     | Yes     | Mexican-Mestizo | - | IV  | - | - |
|  |  |  | Patient 14 | M | 63 | No      | No      | Mexican-Mestizo | - | IV  | - | - |
|  |  |  | Patient 15 | M | 46 | No data | No data | Mexican-Mestizo | - | IV  | - | - |
|  |  |  | Patient 16 | F | 63 | No      | Yes     | Mexican-Mestizo | - | III | - | - |
|  |  |  | Patient 17 | F | 75 | Yes     | Yes     | Mexican-Mestizo | - | IV  | - | - |
|  |  |  | Patient 18 | F | 65 | No      | Yes     | Mexican-Mestizo | - | III | - | - |
|  |  |  | Patient 19 | M | 75 | No      | No      | Mexican-Mestizo | - | IV  | - | - |
|  |  |  | Patient 20 | M | 56 | No data | No data | Mexican-Mestizo | - | III | - | - |
|  |  |  | Patient 21 | M | 62 | No      | No      | Mexican-Mestizo | - | IV  | - | - |
|  |  |  | Patient 22 | F | 68 | Yes     | Yes     | Mexican-Mestizo | - | I   | - | - |
|  |  |  | Patient 23 | F | 51 | No      | Yes     | Mexican-Mestizo | - | III | - | - |
|  |  |  | Patient 24 | M | 48 | No      | Yes     | Mexican-Mestizo | - | IV  | - | - |
|  |  |  | Patient 25 | M | 56 | No      | No      | Mexican-Mestizo | - | IV  | - | - |

|            |   |    |         |         |                 |   |     |   |   |
|------------|---|----|---------|---------|-----------------|---|-----|---|---|
| Patient 26 | F | 71 | No      | Yes     | Mexican-Mestizo | - | IV  | - | - |
| Patient 27 | M | 48 | No      | No      | Mexican-Mestizo | - | III | - | - |
| Patient 28 | M | 72 | No      | No      | Mexican-Mestizo | - | III | - | - |
| Patient 29 | M | 46 | No      | No      | Mexican-Mestizo | - | IV  | - | - |
| Patient 30 | F | 63 | No      | No      | Mexican-Mestizo | - | IV  | - | - |
| Patient 31 | M | 69 | No      | No      | Mexican-Mestizo | - | III | - | - |
| Patient 32 | F | 51 | Yes     | No data | Mexican-Mestizo | - | II  | - | - |
| Patient 33 | F | 50 | No      | No data | Mexican-Mestizo | - | II  | - | - |
| Patient 34 | M | 62 | No      | No data | Mexican-Mestizo | - | IV  | - | - |
| Patient 35 | F | 60 | No      | Yes     | Mexican-Mestizo | - | III | - | - |
| Patient 36 | M | 57 | No data | No data | Mexican-Mestizo | - | II  | - | - |
| Patient 37 | M | 65 | No data | No data | Mexican-Mestizo | - | IV  | - | - |
| Patient 38 | M | 60 | No data | No data | Mexican-Mestizo | - | III | - | - |
| Patient 39 | M | 60 | No data | No data | Mexican-Mestizo | - | III | - | - |
| Patient 40 | M | 44 | No data | No data | Mexican-Mestizo | - | III | - | - |
| Patient 41 | F | 82 | No data | No      | Mexican-Mestizo | - | IV  | - | - |
| Patient 42 | F | 71 | Yes     | Yes     | Mexican-Mestizo | - | III | - | - |
| Patient 43 | F | 68 | No      | Yes     | Mexican-Mestizo | - | -   | - | - |
| Patient 44 | M | -  | No      | No      | Mexican-Mestizo | - | -   | - | - |

|  |  |  |            |   |    |     |     |                 |     |    |   |   |
|--|--|--|------------|---|----|-----|-----|-----------------|-----|----|---|---|
|  |  |  | Patient 45 | F | 63 | No  | No  | Mexican-Mestizo | -   | II | - | - |
|  |  |  | Patient 46 | F | 71 | Yes | Yes | Mexican-Mestizo | 2.9 | II | - | - |

Blue letters correspond to plasma samples and dark letters indicate tissue samples.
